# Supplementary material for: Potential energy surface for cyclotrimethylene trinitramine dimer from symmetry-adapted perturbation theory
Source: Royal Society of Chemistry journal article supplement (doi:10.1039/b709192c), 2007-01-01
Supplement: b709192c.pdf [file b709192c.pdf]

Supplement to the paper:  
**Three-body symmetry-adapted perturbation theory based on Kohn-Sham description  
of the monomers**

Rafał Podeszwa<sup>a,\*</sup>, Robert Bukowski<sup>b</sup>, Betsy M. Rice<sup>c</sup>, and Krzysztof Szalewicz<sup>a</sup>

<sup>a</sup>*Department of Physics and Astronomy, University of Delaware, Newark, DE 19716*

<sup>b</sup>*Computational Biology Service Unit, Cornell University, 620 Rhodes Hall, Ithaca, NY 14853*

<sup>c</sup>*The U.S. Army Research Laboratory, Aberdeen Proving Ground, Maryland 21005*

Due to requirements of the journal, the supplementary data are presented in the PDF format.  
Machine readable files with these results (including induction and dispersion asymptotic coefficients  
 $C_9$ - $C_{12}$ ) can be requested by contacting the authors.

**Contents**

|                                                                     |    |
|---------------------------------------------------------------------|----|
| <b>I. Internal coordinates</b>                                      | 2  |
| <b>II. Monomer coordinates and orientation after symmetrization</b> | 2  |
| <b>III. SAPT(DFT) results</b>                                       | 2  |
| A. Points used for the fit                                          | 2  |
| B. Minima                                                           | 20 |
| C. Results used for testing the accuracy of the fit                 | 21 |
| <b>IV. Parameters of the fit</b>                                    | 22 |
| <b>V. Asymptotic properties</b>                                     | 24 |
| A. Multipole moments                                                | 24 |
| B. Induction and dispersion asymptotic coefficients                 | 25 |
| <b>References</b>                                                   | 63 |

---

\*E-mail: poszwa@physics.udel.edu

The grid constructed in the space of 6 dimer coordinates: the “ $zyz$ ” Euler angles  $\beta_A$  and  $\gamma_A$  of monomer  $A$ , the “ $zyz$ ” Euler angles  $\alpha_B, \beta_B$ , and  $\gamma_B$  of monomer  $B$ , and the distance  $R$  between the centers of mass of the monomers. The “ $zyz$ ” Euler angles [1] of a given monomer are defined in a local coordinate frame with the origin in the center of this monomer and the  $z$  axes parallel to the vector pointing from the center of  $A$  to the center of  $B$ . Both local frames are parallel to each other. When all three Euler angles of a monomer are equal to zero, this monomer is located in the  $xy$  plane of its local frame with two carbon atoms on the  $y$  axis. With dimer coordinates defined in this way, the coordinate  $\alpha_A$  can be arbitrarily set to zero since the dependence of the potential on this coordinate is only through the difference  $\alpha_B - \alpha_A$ .

## II. MONOMER COORDINATES AND ORIENTATION AFTER SYMMETRIZATION

Initial configuration of the RDX monomer corresponding to all Euler angles equal to zero and the center of the mass at the origin. Index denotes symmetry non-equivalent atoms. This value is used in labeling of the fit parameters.

| #                  | x                  | y                  | z    | label | index |
|--------------------|--------------------|--------------------|------|-------|-------|
| # units in bohr    |                    |                    |      |       |       |
| -0.647945115066884 | -2.323809004629406 | -2.205988699518148 | 'C1' | 1     |       |
| 3.285635172431240  | 0.000000025466144  | -1.519143945702228 | 'C2' | 2     |       |
| -0.647945149617100 | 2.323808998018714  | -2.205988696333813 | 'C3' | 1     |       |
| -1.955754439090642 | -0.000000013498146 | -1.519143962627577 | 'N1' | 3     |       |
| 1.812157320388382  | -2.287568591743575 | -1.036779262835576 | 'N2' | 4     |       |
| 1.812157286376986  | 2.287568620107320  | -1.036779259700903 | 'N3' | 4     |       |
| -4.483780227519703 | -0.000000032530831 | -1.169683712374306 | 'N4' | 5     |       |
| 1.974155437519109  | -3.332381744880436 | 1.378465665081043  | 'N5' | 6     |       |
| 1.974155387973510  | 3.332381772343128  | 1.378465669647432  | 'N6' | 6     |       |
| -5.534446819909161 | 2.043859511459925  | -0.995613797994236 | 'O1' | 7     |       |
| -5.534446789521211 | -2.043859592381344 | -0.995613800794954 | 'O2' | 7     |       |
| 3.836698841059196  | -2.871076647963207 | 2.586652259344398  | 'O3' | 8     |       |
| 0.310973098949443  | -4.754894775950226 | 2.000796079265844  | 'O4' | 9     |       |
| 3.836698798372247  | 2.871076701462458  | 2.586652263278656  | 'O5' | 8     |       |
| 0.310973028254029  | 4.754894777832066  | 2.000796085781512  | 'O6' | 9     |       |
| -0.375382385049345 | -2.388713213601610 | -4.214894211133457 | 'H1' | 10    |       |
| -1.711697641368477 | -3.961327612308654 | -1.594366893673368 | 'H2' | 11    |       |
| 4.996855782814205  | 0.000000037412486  | -0.388292852855849 | 'H3' | 12    |       |
| 3.760442558791464  | 0.000000030365295  | -3.517891634938608 | 'H4' | 13    |       |
| -0.375382420564552 | 2.388713213796177  | -4.214894207860185 | 'H5' | 10    |       |
| -1.711697700265195 | 3.961327589044061  | -1.594366888245129 | 'H6' | 11    |       |

## III. SAPT(DFT) RESULTS

### A. Points used for the fit

TABLE I: SAPT(DFT) results used for the fit.  $R$ —distance between centers of the mass of the monomers (in Å),  $\beta_A, \gamma_A, \alpha_B, \beta_B, \gamma_B$ —Euler angles (in degrees), ‘elst’— $E_{\text{elst}}^{(1)}$ (KS), ‘exch’— $E_{\text{exch}}^{(1)}$ (KS), ‘ind’— $E_{\text{ind}}^{(2)}$ (CKS), ‘ex-ind’— $\tilde{E}_{\text{exch-ind}}^{(2)}$ (CKS), ‘disp’— $E_{\text{disp}}^{(2)}$ (CKS), ‘ex-disp’— $\tilde{E}_{\text{exch-disp}}^{(2)}$ (CKS),  $E_{\text{int}}$ —total interaction energy,  $E_{\text{diff}} = E_{\text{int}} - E_{\text{fit}}$ , where  $E_{\text{fit}}$  is the energy obtained from the fit. Energies in kcal/mol

| $R$      | $\beta_A$ | $\gamma_A$ | $\alpha_B$ | $\beta_B$  | $\gamma_B$ | elst     | exch    | ind      | ex-ind  | disp     | ex-disp | $E_{\text{int}}$ | $E_{\text{diff}}$ |
|----------|-----------|------------|------------|------------|------------|----------|---------|----------|---------|----------|---------|------------------|-------------------|
| 4.500000 | 0.000000  | 0.000000   | 0.000000   | 180.000000 | 0.000000   | -6.1391  | 28.3386 | -12.8502 | 12.3500 | -12.3007 | 1.8004  | 11.1990          | 5.2175            |
| 4.800000 | 0.000000  | 0.000000   | 0.000000   | 0.000000   | 0.000000   | -13.1526 | 37.2115 | -18.6854 | 15.3669 | -17.8393 | 2.4858  | 5.3869           | 1.1406            |
| 4.800000 | 0.000000  | 0.000000   | 180.000000 | 90.000000  | 90.000000  | -14.6370 | 43.1273 | -20.8943 | 17.4907 | -21.8563 | 2.9848  | 6.2152           | 0.3355            |
| 4.900000 | 0.000000  | 0.000000   | 180.000000 | 90.000000  | 0.000000   | -12.9652 | 40.8691 | -18.6108 | 15.3585 | -21.1503 | 2.8327  | 6.3340           | 0.3934            |
| 5.000000 | 0.000000  | 0.000000   | 0.000000   | 0.000000   | 90.000000  | -8.4486  | 21.0690 | -9.8802  | 7.4510  | -13.0900 | 1.4646  | -1.4342          | 0.3738            |
| 5.100000 | 0.000000  | 0.000000   | 0.000000   | 180.000000 | 90.000000  | -1.8048  | 13.9870 | -6.1720  | 5.8734  | -7.9948  | 1.0105  | 4.8993           | 1.3440            |
| 5.100000 | 45.000000 | 45.000000  | 135.000000 | 135.000000 | 45.000000  | -13.0842 | 35.2163 | -15.5074 | 14.3081 | -16.9000 | 2.3475  | 6.3802           | 0.4106            |
| 5.100000 | 81.671183 | 162.444532 | 223.638285 | 166.525426 | 218.035092 | -9.4154  | 26.8478 | -12.6514 | 10.2947 | -15.4889 | 1.8471  | 1.4339           | -0.1470           |

continued on next page

| $R$      | $\beta_A$  | $\gamma_A$ | $\alpha_B$ | $\beta_B$  | $\gamma_B$ | elst     | exch    | ind      | ex-ind  | disp     | ex-disp | $E_{\text{int}}$ | $E_{\text{diff}}$ |
|----------|------------|------------|------------|------------|------------|----------|---------|----------|---------|----------|---------|------------------|-------------------|
| 5.400000 | 0.000000   | 0.000000   | 90.000000  | 90.000000  | 90.000000  | -7.2468  | 21.4084 | -9.2705  | 8.0864  | -11.3280 | 1.3816  | 3.0312           | 0.4796            |
| 5.400000 | 8.596947   | 83.130018  | 244.316097 | 98.769969  | 334.717385 | -8.2363  | 23.0509 | -10.1881 | 7.8337  | -13.1395 | 1.5327  | 0.8535           | 0.2089            |
| 5.400000 | 35.000000  | 270.000000 | 180.000000 | 180.000000 | 270.000000 | -5.7140  | 17.8468 | -8.0675  | 7.5958  | -8.4996  | 1.1964  | 4.3578           | -0.1471           |
| 5.400000 | 45.000000  | 45.000000  | 135.000000 | 45.000000  | 45.000000  | -12.3938 | 31.2057 | -14.7473 | 13.4372 | -13.8908 | 2.0671  | 5.6782           | 0.3203            |
| 5.400000 | 45.000000  | 45.000000  | 135.000000 | 135.000000 | 135.000000 | -5.7733  | 19.6847 | -9.6625  | 9.1862  | -8.3907  | 1.3241  | 6.3683           | 0.8427            |
| 5.400000 | 75.000000  | 270.000000 | 180.000000 | 180.000000 | 270.000000 | -5.2718  | 10.8059 | -4.9783  | 3.8916  | -9.3646  | 0.8395  | -4.0778          | -0.0381           |
| 5.400000 | 85.000000  | 270.000000 | 180.000000 | 180.000000 | 270.000000 | -6.5924  | 18.0636 | -7.8819  | 6.6968  | -10.7774 | 1.2159  | 0.7246           | 0.4450            |
| 5.400000 | 95.000000  | 270.000000 | 180.000000 | 180.000000 | 270.000000 | -7.5140  | 23.0302 | -9.9685  | 8.8175  | -11.5649 | 1.4616  | 4.2618           | 0.3606            |
| 5.400000 | 115.000000 | 270.000000 | 180.000000 | 180.000000 | 270.000000 | -4.2534  | 13.4052 | -5.8964  | 4.7277  | -9.7968  | 0.9898  | -0.8240          | 0.0668            |
| 5.400000 | 175.000000 | 270.000000 | 180.000000 | 180.000000 | 270.000000 | -3.9065  | 7.6842  | -4.1421  | 2.8189  | -7.5453  | 0.6194  | -4.4714          | 0.0777            |
| 5.400000 | 215.000000 | 270.000000 | 180.000000 | 180.000000 | 270.000000 | -2.8655  | 6.2059  | -3.1254  | 1.9357  | -7.4396  | 0.5205  | -4.7684          | -0.1690           |
| 5.400000 | 235.000000 | 270.000000 | 180.000000 | 180.000000 | 270.000000 | -3.2050  | 9.5973  | -4.4990  | 3.2277  | -8.7975  | 0.7586  | -2.9180          | -0.1859           |
| 5.400000 | 255.000000 | 270.000000 | 180.000000 | 180.000000 | 270.000000 | -6.3029  | 19.7740 | -8.5643  | 7.4746  | -10.9969 | 1.3143  | 2.6987           | 0.1393            |
| 5.400000 | 265.000000 | 270.000000 | 180.000000 | 180.000000 | 270.000000 | -7.5140  | 23.0302 | -9.9686  | 8.8175  | -11.5649 | 1.4616  | 4.2618           | 0.3606            |
| 5.400000 | 275.000000 | 270.000000 | 180.000000 | 180.000000 | 270.000000 | -6.5924  | 18.0636 | -7.8819  | 6.6968  | -10.7774 | 1.2159  | 0.7246           | 0.4450            |
| 5.400000 | 285.000000 | 270.000000 | 180.000000 | 180.000000 | 270.000000 | -5.2718  | 10.8059 | -4.9783  | 3.8916  | -9.3646  | 0.8395  | -4.0778          | -0.0381           |
| 5.400000 | 310.000000 | 270.000000 | 180.000000 | 180.000000 | 270.000000 | -5.8711  | 13.7548 | -6.3116  | 5.6037  | -8.9911  | 0.9998  | -0.8156          | -0.5244           |
| 5.400000 | 315.000000 | 270.000000 | 180.000000 | 180.000000 | 270.000000 | -6.3210  | 16.5472 | -7.5476  | 6.9108  | -9.1474  | 1.1428  | 1.5848           | -0.6004           |
| 5.400000 | 335.000000 | 270.000000 | 180.000000 | 180.000000 | 270.000000 | -2.6061  | 11.7584 | -5.1042  | 4.7951  | -6.4881  | 0.8257  | 3.1808           | 0.7885            |
| 5.400000 | 355.000000 | 270.000000 | 180.000000 | 180.000000 | 270.000000 | 1.5151   | 1.8433  | -0.7288  | 0.5126  | -3.3043  | 0.1510  | -0.0111          | 0.4304            |
| 5.500000 | 0.000000   | 0.000000   | 0.000000   | 0.000000   | 0.000000   | -3.7299  | 5.2819  | -2.8180  | 1.6093  | -6.3492  | 0.4402  | -5.5658          | -0.1212           |
| 5.500000 | 0.000000   | 0.000000   | 0.000000   | 90.000000  | 90.000000  | -9.1350  | 28.6656 | -14.6043 | 13.3144 | -13.5782 | 2.0363  | 6.6987           | 0.2286            |
| 5.500000 | 0.000000   | 0.000000   | 0.000000   | 180.000000 | 0.000000   | 1.6523   | 1.0854  | -0.4457  | 0.2607  | -2.7750  | 0.0921  | -0.1302          | 0.1658            |
| 5.500000 | 0.000000   | 0.000000   | 0.000000   | 180.000000 | 180.000000 | 1.0416   | 8.2955  | -3.1437  | 2.7672  | -6.0964  | 0.6004  | 3.4647           | 1.4576            |
| 5.500000 | 0.000000   | 0.000000   | 90.000000  | 90.000000  | 0.000000   | -9.3391  | 30.8237 | -13.7558 | 12.3805 | -12.6150 | 1.7862  | 9.2804           | 0.8359            |
| 5.500000 | 0.000000   | 0.000000   | 90.000000  | 90.000000  | 270.000000 | -10.7995 | 27.8875 | -15.4951 | 14.2194 | -13.2995 | 2.0093  | 4.5220           | -0.2185           |
| 5.500000 | 12.517717  | 277.527859 | 83.116866  | 104.229433 | 355.373530 | -11.0880 | 29.6060 | -14.1747 | 12.3565 | -13.9504 | 1.9758  | 4.7252           | 0.4515            |
| 5.500000 | 29.387152  | 39.370209  | 202.262819 | 75.098244  | 331.672406 | -9.5673  | 25.2736 | -10.5401 | 8.7738  | -11.7245 | 1.5292  | 3.7448           | 1.1133            |
| 5.500000 | 71.019778  | 185.771849 | 298.861236 | 167.061553 | 284.654555 | -23.9385 | 62.0446 | -32.0886 | 28.7546 | -19.4763 | 3.5122  | 18.8080          | -0.6293           |
| 5.600000 | 0.000000   | 0.000000   | 180.000000 | 90.000000  | 90.000000  | -2.4100  | 4.2109  | -2.0191  | 1.1316  | -6.6423  | 0.3697  | -5.3591          | 0.0142            |
| 5.600000 | 45.000000  | 45.000000  | 45.000000  | 45.000000  | 45.000000  | -10.5940 | 25.8799 | -9.9812  | 7.5973  | -11.4448 | 1.4921  | 2.9493           | -0.3411           |
| 5.600000 | 45.000000  | 45.000000  | 45.000000  | 45.000000  | 135.000000 | -10.8580 | 26.8240 | -10.8485 | 7.9112  | -11.7581 | 1.4859  | 2.7564           | -0.4435           |
| 5.700000 | 98.554589  | 241.861990 | 296.705317 | 59.550224  | 60.367812  | -28.9209 | 76.5583 | -46.3474 | 41.4524 | -27.7420 | 5.2289  | 20.2293          | -1.8558           |
| 5.700000 | 135.000000 | 135.000000 | 135.000000 | 135.000000 | 135.000000 | -10.1604 | 23.2224 | -10.0467 | 7.8034  | -9.9701  | 1.3065  | 2.1551           | 0.0215            |
| 5.800000 | 0.000000   | 0.000000   | 0.000000   | 90.000000  | 0.000000   | -3.6136  | 17.1174 | -7.0917  | 6.1939  | -9.3557  | 1.1465  | 4.3968           | 0.1938            |
| 5.800000 | 0.000000   | 0.000000   | 0.000000   | 90.000000  | 180.000000 | -9.5459  | 24.3927 | -11.6144 | 10.7666 | -11.5549 | 1.6413  | 4.0854           | -1.1235           |
| 5.800000 | 45.000000  | 45.000000  | 45.000000  | 135.000000 | 45.000000  | -8.8432  | 25.3722 | -11.7640 | 11.0822 | -12.2359 | 1.7455  | 5.3569           | -0.0926           |
| 5.800000 | 81.671183  | 162.444532 | 223.638285 | 166.525426 | 218.035092 | -2.2126  | 3.6393  | -1.6984  | 0.9626  | -5.5021  | 0.2981  | -4.5131          | -0.1004           |
| 5.900000 | 71.019778  | 185.771849 | 298.861236 | 167.061553 | 284.654555 | -8.3242  | 21.0254 | -9.7548  | 8.3885  | -10.4617 | 1.4115  | 2.2845           | 0.1541            |
| 5.900000 | 121.551323 | 222.058840 | 180.000000 | 58.448677  | 317.941160 | -4.9805  | 18.4461 | -9.7432  | 7.6344  | -12.8493 | 1.5740  | 0.0816           | 0.0186            |
| 5.900000 | 135.000000 | 45.000000  | 135.000000 | 135.000000 | 135.000000 | -8.3712  | 22.6519 | -9.1500  | 7.9388  | -10.3283 | 1.3359  | 4.0771           | -0.6626           |
| 6.000000 | 0.000000   | 0.000000   | 0.000000   | 0.000000   | 180.000000 | -2.3227  | 1.3673  | -0.9535  | 0.3537  | -3.2541  | 0.1248  | -4.6844          | 0.1029            |
| 6.000000 | 0.000000   | 0.000000   | 90.000000  | 90.000000  | 0.000000   | -1.3468  | 5.7514  | -2.4192  | 1.7784  | -5.5977  | 0.4259  | -1.4080          | 0.3577            |
| 6.000000 | 0.000000   | 0.000000   | 90.000000  | 90.000000  | 180.000000 | -11.7612 | 30.0283 | -15.3626 | 14.2560 | -12.4435 | 1.9856  | 6.7026           | -0.2540           |
| 6.000000 | 27.975184  | 222.940928 | 156.291557 | 131.529174 | 295.198928 | -8.2729  | 24.4079 | -11.2896 | 10.7077 | -11.7603 | 1.7596  | 5.5526           | -0.8577           |
| 6.000000 | 45.000000  | 45.000000  | 135.000000 | 135.000000 | 45.000000  | -1.0601  | 3.8332  | -1.6182  | 1.2130  | -5.2760  | 0.3432  | -2.5650          | 0.0699            |
| 6.000000 | 50.599977  | 196.174792 | 201.009517 | 22.666173  | 155.246366 | -25.8947 | 55.0860 | -22.7417 | 17.9367 | -20.2904 | 3.1768  | 7.2727           | 0.7068            |
| 6.000000 | 90.000000  | 180.000000 | 0.000000   | 0.000000   | 0.000000   | -4.6724  | 23.8497 | -10.3896 | 6.3219  | -13.6349 | 1.5154  | 2.9901           | 0.2768            |
| 6.000000 | 98.554589  | 241.861990 | 296.705317 | 59.550224  | 60.367812  | -10.6127 | 28.6285 | -16.9936 | 14.7151 | -16.0554 | 2.2853  | 1.9671           | -0.4327           |
| 6.000000 | 104.308972 | 234.148849 | 303.793958 | 55.899948  | 49.989063  | -4.4953  | 20.9249 | -10.8322 | 8.7826  | -13.7636 | 1.7309  | 2.3474           | 0.2740            |
| 6.000000 | 108.150624 | 202.758704 | 180.000000 | 71.849376  | 337.241296 | -18.0014 | 46.6534 | -20.4512 | 15.9168 | -19.4053 | 2.9867  | 7.6990           | -0.2976           |
| 6.000000 | 117.405477 | 127.653940 | 200.980538 | 44.030741  | 42.389158  | -1.4973  | 11.6030 | -6.3279  | 4.3802  | -10.1922 | 1.0508  | -0.9834          | -0.1495           |
| 6.000000 | 131.733633 | 123.437859 | 47.850900  | 74.725529  | 332.270502 | -2.6804  | 21.0914 | -9.4174  | 6.9564  | -13.5530 | 1.5988  | 3.9959           | -0.8852           |
| 6.000000 | 135.000000 | 45.000000  | 135.000000 | 45.000000  | 45.000000  | -7.1915  | 24.5791 | -11.5793 | 8.1465  | -13.4280 | 1.7567  | 2.2834           | -0.0446           |
| 6.000000 | 143.861890 | 12.707657  | 33.454380  | 132.217886 | 40.863495  | -33.2283 | 88.8905 | -45.7665 | 38.8181 | -26.9076 | 5.3284  | 27.1346          | -0.8201           |
| 6.100000 | 76.607777  | 62.516200  | 241.207034 | 62.372825  | 304.186672 | -7.8906  | 21.3401 | -8.4049  | 6.6597  | -12.5438 | 1.4923  | 0.6528           | -0.7149           |
| 6.100000 | 90.000000  | 90.000000  | 0.000000   | 0.000000   | 0.000000   | -9.4722  | 26.6373 | -13.5989 | 9.9867  | -13.0903 | 1.8388  | 2.3014           | 0.3745            |
| 6.100000 | 90.000000  | 90.000000  | 0.000000   | 0.000000   | 180.000000 | -6.3262  | 25.8800 | -13.6841 | 10.2338 | -13.0985 | 1.7965  | 4.8015           | 0.2264            |
| 6.100000 | 121.376328 | 143.341280 | 227.256700 | 114.792860 | 229.047950 | -10.4578 | 27.6588 | -11.8318 | 9.5560  | -12.0112 | 1.6753  | 4.5894           | -0.8779           |
| 6.200000 | 0.000000   | 0.000000   | 0.000000   | 180.000000 | 90.000000  | 1.5706   | 0.3708  | -0.1987  | 0.0738  | -1.6035  | 0.0356  | 0.2486           | 0.0224            |
| 6.200000 | 0.000000   | 0.000000   | 180.000000 | 90.000000  | 0.000000   | -1.0145  | 1.1435  | -0.7351  | 0.2206  | -3.4121  | 0.1076  | -3.6900          | 0.1992            |
| 6.200000 | 0.000000   | 0.000000   | 180.000000 | 90.000000  | 180.000000 | -10.9820 | 28.5454 | -14.4459 | 13.5932 | -12.5299 | 2.0857  | 6.2665           | 0.3627            |
| 6.200000 | 8.596947   | 83.130018  | 244.316097 | 98.769969  | 334.717385 | -1.8278  | 2.0701  | -1.0313  | 0.4262  | -4.0226  | 0.1746  | -4.2108          | -0.3085           |
| 6.200000 | 50.599977  | 196.174792 | 201.009517 | 22.666173  | 155.246366 | -16.5935 | 29.7076 | -11.9041 | 8.7021  | -14.4507 | 1.9017  | -2.6369          | 0.4098            |
| 6.200000 | 97.239603  | 59.157214  | 12.332528  | 75.554587  | 61.199728  | -6.5288  | 25.8188 | -10.5012 | 8.6226  | -13.5536 | 1.7266  | 5.5844           | -0.2556           |
| 6.200000 | 97.803762  | 215.755776 | 180.000000 | 82.196238  | 324.244224 | -11.1278 | 25.8763 | -12.1551 | 9.8543  | -15.2508 | 2.0075  | -0.7955          | -0.0812           |

continued on next page

*Energies continued from previous page*

| $R$      | $\beta_A$  | $\gamma_A$ | $\alpha_B$ | $\beta_B$  | $\gamma_B$ | elst     | exch    | ind      | ex-ind  | disp     | ex-disp | $E_{\text{int}}$ | $E_{\text{diff}}$ |
|----------|------------|------------|------------|------------|------------|----------|---------|----------|---------|----------|---------|------------------|-------------------|
| 6.200000 | 127.704139 | 256.782821 | 296.996640 | 85.290675  | 39.984254  | -6.8085  | 22.5736 | -12.2249 | 10.6327 | -12.4187 | 1.7549  | 3.5090           | 0.8054            |
| 6.200000 | 135.000000 | 45.000000  | 135.000000 | 45.000000  | 135.000000 | -9.5551  | 25.9312 | -12.4112 | 8.7746  | -13.4525 | 1.7599  | 1.0469           | 0.1961            |
| 6.200000 | 161.968501 | 69.385966  | 11.865985  | 137.683973 | 82.721725  | -10.8814 | 21.2706 | -10.4328 | 8.1244  | -10.6719 | 1.5801  | -1.0109          | -0.1690           |
| 6.300000 | 0.000000   | 0.000000   | 0.000000   | 180.000000 | 180.000000 | 2.0035   | 0.5304  | -0.2646  | 0.1002  | -1.8238  | 0.0472  | 0.5929           | -0.1537           |
| 6.300000 | 79.236471  | 158.472518 | 67.739575  | 4.404374   | 274.067687 | -8.1200  | 22.2249 | -10.3845 | 6.9645  | -11.7239 | 1.4882  | 0.4492           | -0.0674           |
| 6.300000 | 94.225864  | 143.871740 | 200.650284 | 71.173976  | 34.759276  | -12.3227 | 28.8057 | -13.5639 | 10.5579 | -13.8438 | 1.8518  | 1.4849           | -0.1868           |
| 6.300000 | 121.618720 | 298.804815 | 180.000000 | 58.381280  | 241.195185 | -7.5887  | 19.3642 | -7.3016  | 4.6096  | -11.2698 | 1.2420  | -0.9444          | -0.0088           |
| 6.300000 | 135.000000 | 135.000000 | 45.000000  | 45.000000  | 135.000000 | 2.3933   | 11.9602 | -6.1261  | 4.0007  | -9.1190  | 0.9354  | 4.0446           | -0.2102           |
| 6.400000 | 30.526642  | 175.582130 | 220.086395 | 139.428567 | 40.437647  | -6.4241  | 21.5597 | -9.9874  | 9.4573  | -9.2771  | 1.5294  | 6.8577           | 0.6658            |
| 6.400000 | 90.420384  | 358.489876 | 232.059589 | 19.761823  | 323.504456 | -31.1441 | 77.0212 | -40.9921 | 34.9385 | -24.2591 | 5.1307  | 20.6951          | -1.5053           |
| 6.400000 | 97.982017  | 306.372973 | 196.844368 | 62.907327  | 225.611445 | -25.7132 | 58.6638 | -23.2803 | 17.8845 | -18.3806 | 2.9654  | 12.1396          | -0.4156           |
| 6.400000 | 131.620340 | 315.122197 | 161.712968 | 67.978962  | 237.556912 | -13.5172 | 29.0631 | -12.0371 | 8.6185  | -12.7777 | 1.7532  | 1.1027           | 0.3915            |
| 6.400000 | 135.000000 | 135.000000 | 135.000000 | 45.000000  | 45.000000  | 2.3661   | 5.0977  | -2.6404  | 1.1400  | -5.5926  | 0.3904  | 0.7612           | 0.1043            |
| 6.400000 | 135.000000 | 135.000000 | 135.000000 | 45.000000  | 45.000000  | 2.3661   | 5.0977  | -2.6404  | 1.1400  | -5.5926  | 0.3904  | 0.7612           | 0.1043            |
| 6.400000 | 135.000000 | 135.000000 | 135.000000 | 135.000000 | 45.000000  | -16.6436 | 36.7810 | -19.3422 | 17.2219 | -14.0741 | 2.5705  | 6.5135           | -1.0729           |
| 6.400000 | 180.000000 | 0.000000   | 0.000000   | 0.000000   | 90.000000  | 7.1866   | 2.6551  | -2.2378  | 0.5418  | -4.2285  | 0.2080  | 4.1251           | 0.0238            |
| 6.447794 | 98.554589  | 241.861990 | 296.705317 | 59.550224  | 60.367812  | -2.0463  | 6.4329  | -3.9526  | 2.8235  | -7.4129  | 0.6093  | -3.5461          | -0.3017           |
| 6.500000 | 0.000000   | 0.000000   | 0.000000   | 0.000000   | 90.000000  | -2.0347  | 0.2646  | -0.4052  | 0.0470  | -1.6972  | 0.0274  | -3.7980          | 0.0358            |
| 6.500000 | 0.000000   | 0.000000   | 90.000000  | 90.000000  | 90.000000  | -0.3183  | 0.8333  | -0.4427  | 0.1844  | -2.4384  | 0.0744  | -2.1074          | -0.0799           |
| 6.500000 | 0.000000   | 0.000000   | 90.000000  | 90.000000  | 270.000000 | -0.5330  | 1.3477  | -0.7368  | 0.4558  | -2.8901  | 0.1299  | -2.2266          | 0.0436            |
| 6.500000 | 8.759236   | 130.662423 | 136.187337 | 65.629709  | 194.187098 | -5.8368  | 20.3562 | -9.8919  | 9.0951  | -10.3072 | 1.6391  | 5.0545           | 0.9863            |
| 6.500000 | 12.517717  | 277.527859 | 83.116866  | 104.229433 | 355.373530 | -1.1268  | 1.8399  | -0.8992  | 0.4482  | -3.2830  | 0.1595  | -2.8613          | 0.1150            |
| 6.500000 | 13.138499  | 290.372962 | 360.000000 | 13.138499  | 290.372962 | -2.2835  | 0.4528  | -0.5042  | 0.0812  | -1.8099  | 0.0419  | -4.0217          | 0.0093            |
| 6.500000 | 13.740451  | 22.493003  | 5.019652   | 91.284163  | 198.573686 | -0.6123  | 3.0587  | -1.4030  | 1.0418  | -3.6831  | 0.2679  | -1.3299          | 0.4724            |
| 6.500000 | 19.351586  | 80.453534  | 0.000000   | 19.351586  | 80.453534  | -2.6843  | 0.8656  | -0.6924  | 0.1687  | -2.1328  | 0.0751  | -4.4000          | 0.0522            |
| 6.500000 | 25.817151  | 128.499906 | 290.313904 | 119.235591 | 342.406001 | -4.0000  | 11.9985 | -4.4908  | 3.4868  | -8.2197  | 0.9224  | -0.3027          | -0.1090           |
| 6.500000 | 28.272226  | 180.103173 | 180.000000 | 151.727774 | 359.896827 | 0.7073   | 2.7929  | -1.1660  | 0.8646  | -3.7099  | 0.2494  | -0.2617          | 0.5266            |
| 6.500000 | 28.831759  | 22.225265  | 219.199012 | 79.930228  | 359.170590 | -0.3869  | 0.2365  | -0.2938  | 0.0417  | -1.8443  | 0.0240  | -2.2228          | -0.1449           |
| 6.500000 | 31.766957  | 40.754324  | 52.752985  | 23.076839  | 355.951514 | -1.9383  | 0.4395  | -0.4435  | 0.0767  | -1.8231  | 0.0424  | -3.6464          | -0.0832           |
| 6.500000 | 36.772391  | 201.030942 | 329.920118 | 50.924896  | 225.963118 | -7.1706  | 15.8496 | -6.7380  | 4.7103  | -8.5322  | 0.9947  | -0.8863          | -0.2378           |
| 6.500000 | 38.798573  | 197.354376 | 0.000000   | 38.798573  | 197.354376 | -3.9832  | 6.4351  | -3.0869  | 1.5330  | -6.7911  | 0.5147  | -5.3784          | 0.1454            |
| 6.500000 | 41.325815  | 206.338056 | 39.343148  | 37.030696  | 172.504206 | -8.0865  | 19.5647 | -8.9369  | 6.3609  | -10.1435 | 1.3077  | 0.0664           | -0.2351           |
| 6.500000 | 42.198447  | 135.539694 | 0.000000   | 42.198447  | 135.539694 | -19.1750 | 51.3223 | -25.8360 | 19.9382 | -14.1814 | 2.4580  | 14.5261          | 2.0091            |
| 6.500000 | 45.000000  | 45.000000  | 45.000000  | 135.000000 | 135.000000 | 1.0384   | 1.1296  | -0.4117  | 0.2412  | -2.2701  | 0.0928  | -0.1799          | 0.1933            |
| 6.500000 | 45.000000  | 45.000000  | 135.000000 | 45.000000  | 45.000000  | -2.1949  | 1.1185  | -0.6188  | 0.2662  | -2.6852  | 0.1057  | -4.0085          | 0.0697            |
| 6.500000 | 45.000000  | 135.000000 | 135.000000 | 45.000000  | 45.000000  | -15.7849 | 35.4484 | -17.4327 | 15.4173 | -13.3501 | 2.4636  | 6.7616           | -2.4814           |
| 6.500000 | 45.000000  | 135.000000 | 135.000000 | 135.000000 | 135.000000 | -3.3013  | 10.5966 | -4.6677  | 4.3227  | -6.1072  | 0.8414  | 1.6845           | -0.0505           |
| 6.500000 | 46.595194  | 179.202766 | 209.735805 | 34.133897  | 140.993854 | -9.4386  | 12.9777 | -4.8183  | 3.2173  | -9.0953  | 0.8897  | -6.2675          | 0.0839            |
| 6.500000 | 49.619865  | 340.664642 | 167.241210 | 59.278600  | 2.358635   | -1.6428  | 2.2813  | -1.0335  | 0.5083  | -3.4744  | 0.1845  | -3.1766          | 0.0482            |
| 6.500000 | 55.799462  | 203.496852 | 44.621917  | 158.537555 | 45.457470  | -3.3620  | 10.8942 | -4.2002  | 3.5040  | -7.7501  | 0.8481  | -0.0660          | -0.3785           |
| 6.500000 | 58.908192  | 79.201189  | 245.000600 | 84.185909  | 313.169607 | -10.0793 | 26.9118 | -12.2136 | 11.1478 | -12.0507 | 1.9237  | 5.6397           | -1.7341           |
| 6.500000 | 71.019778  | 185.771849 | 298.861236 | 167.061553 | 284.654555 | -1.7048  | 3.6694  | -1.6156  | 1.0425  | -4.2328  | 0.2975  | -2.5437          | 0.0409            |
| 6.500000 | 72.143319  | 163.140130 | 274.499519 | 146.573704 | 266.341096 | -5.2146  | 11.3271 | -4.3173  | 3.2275  | -7.4722  | 0.8257  | -1.6238          | -0.4472           |
| 6.500000 | 73.669434  | 81.738146  | 80.422703  | 77.965133  | 238.316997 | -12.3317 | 31.7767 | -12.3596 | 9.7564  | -13.1134 | 1.9581  | 5.6865           | -0.0220           |
| 6.500000 | 75.341589  | 76.995567  | 6.241542   | 51.058083  | 76.949383  | -4.2777  | 17.0437 | -7.8727  | 6.7420  | -8.8155  | 1.2092  | 4.0289           | 0.2704            |
| 6.500000 | 79.216061  | 216.092425 | 287.894373 | 28.262087  | 71.437569  | -10.0637 | 25.9923 | -12.7479 | 10.0114 | -11.9650 | 1.7849  | 3.0120           | -1.4621           |
| 6.500000 | 79.976656  | 303.441692 | 119.073580 | 44.937169  | 79.144606  | -3.1657  | 6.4799  | -2.8175  | 1.6004  | -6.1016  | 0.4911  | -3.5135          | -0.0412           |
| 6.500000 | 80.631220  | 255.279871 | 8.032994   | 56.860817  | 249.465243 | -14.0495 | 50.5905 | -24.9545 | 19.4555 | -16.0236 | 2.5807  | 17.5991          | -1.0263           |
| 6.500000 | 84.398751  | 230.415868 | 180.000000 | 95.601249  | 309.584132 | -17.1466 | 38.5368 | -20.6156 | 18.5484 | -17.7199 | 2.8774  | 4.4804           | -0.5862           |
| 6.500000 | 85.783411  | 230.004768 | 106.265646 | 146.709078 | 84.051029  | -17.3931 | 50.1828 | -25.0943 | 22.9844 | -13.6272 | 2.7285  | 19.7811          | -1.1370           |
| 6.500000 | 86.057601  | 67.728231  | 67.570054  | 117.055324 | 247.914532 | -5.2815  | 14.8899 | -5.3193  | 4.8173  | -7.3611  | 0.8982  | 2.6435           | -0.4078           |
| 6.500000 | 86.817589  | 354.490138 | 186.095085 | 21.227554  | 345.777194 | -32.2167 | 81.5526 | -46.5958 | 38.0345 | -23.0470 | 4.9031  | 22.6306          | -2.8394           |
| 6.500000 | 89.393632  | 234.380808 | 113.528542 | 131.109999 | 113.339357 | -3.6525  | 9.3018  | -3.9191  | 3.3575  | -7.1595  | 0.7746  | -1.2973          | 0.2145            |
| 6.500000 | 89.402523  | 148.066340 | 21.141098  | 102.825328 | 147.524657 | -13.0350 | 34.4387 | -18.6193 | 16.9599 | -13.6370 | 2.3376  | 8.4449           | 0.9455            |
| 6.500000 | 89.410771  | 204.800914 | 203.114993 | 100.160560 | 340.236216 | -27.1002 | 68.3294 | -31.0753 | 23.4275 | -19.6141 | 3.1879  | 17.1552          | 0.2149            |
| 6.500000 | 89.458834  | 196.830725 | 307.039843 | 29.819647  | 64.848338  | -2.4255  | 16.3239 | -6.7373  | 4.2265  | -8.9137  | 0.9722  | 3.4460           | -0.4993           |
| 6.500000 | 89.885999  | 97.908478  | 355.694844 | 65.339668  | 101.688668 | -3.8777  | 23.0150 | -10.1091 | 8.1523  | -11.0358 | 1.5132  | 7.6578           | 0.2635            |
| 6.500000 | 90.000000  | 90.000000  | 0.000000   | 0.000000   | 90.000000  | -5.4842  | 18.4455 | -9.0834  | 6.4196  | -8.5277  | 1.1262  | 2.8960           | -0.2384           |
| 6.500000 | 90.000000  | 90.000000  | 0.000000   | 0.000000   | 270.000000 | -7.4505  | 20.9108 | -10.4460 | 7.2533  | -8.9429  | 1.2174  | 2.5421           | -0.3660           |
| 6.500000 | 90.000000  | 90.000000  | 180.000000 | 90.000000  | 90.000000  | -13.4880 | 26.6339 | -11.7947 | 9.5109  | -12.6854 | 1.8067  | -0.0166          | -0.0687           |
| 6.500000 | 90.000000  | 90.000000  | 180.000000 | 90.000000  | 270.000000 | -11.4606 | 21.6591 | -9.9773  | 8.3031  | -11.9230 | 1.6276  | -1.7711          | -0.0579           |
| 6.500000 | 90.000000  | 180.000000 | 0.000000   | 0.000000   | 90.000000  | 0.6599   | 7.4194  | -3.5426  | 1.5802  | -6.6307  | 0.5091  | -0.0046          | 0.1080            |
| 6.500000 | 90.000000  | 180.000000 | 0.000000   | 0.000000   | 180.000000 | 1.7983   | 7.2325  | -3.5317  | 1.6165  | -6.6552  | 0.5174  | 0.9778           | -0.2153           |
| 6.500000 | 90.000000  | 180.000000 | 180.000000 | 90.000000  | 0.000000   | -4.4658  | 21.5241 | -8.6086  | 4.4524  | -11.6950 | 1.0661  | 2.2733           | -0.0575           |
| 6.500000 | 90.011145  | 279.241108 | 108.688327 | 73.781411  | 76.788648  | -3.3277  | 12.6661 | -5.0526  | 3.7644  | -8.7852  | 0.9096  | 0.1746           | -0.1254           |
| 6.500000 | 92.251661  | 149.257560 | 240.419439 | 136.992577 | 253.792141 | -8.6816  | 20.5581 | -8.1141  | 6.5550  | -8.9711  | 1.2559  | 2.6023           | 0.3500            |

*continued on next page*

| $R$      | $\beta_A$  | $\gamma_A$ | $\alpha_B$ | $\beta_B$  | $\gamma_B$ | elst     | exch     | ind      | ex-ind  | disp     | ex-disp | $E_{\text{int}}$ | $E_{\text{diff}}$ |
|----------|------------|------------|------------|------------|------------|----------|----------|----------|---------|----------|---------|------------------|-------------------|
| 6.500000 | 92.985634  | 87.174525  | 180.000000 | 87.014366  | 92.825475  | -12.3300 | 23.7350  | -9.7723  | 7.3368  | -11.3618 | 1.4698  | -0.9225          | 0.1193            |
| 6.500000 | 93.378903  | 151.441111 | 43.125534  | 29.521255  | 322.000701 | -6.7569  | 25.2492  | -12.2433 | 8.9375  | -10.2608 | 1.4130  | 6.3387           | 0.0573            |
| 6.500000 | 94.243532  | 197.078778 | 180.000000 | 85.756468  | 342.921222 | -12.2709 | 27.6107  | -11.1430 | 8.3395  | -12.7310 | 1.7221  | 1.5274           | 0.8053            |
| 6.500000 | 96.047951  | 127.191286 | 164.333198 | 103.390092 | 48.949985  | -18.2794 | 41.4065  | -23.4445 | 21.3662 | -17.0607 | 2.9252  | 6.9134           | 1.2631            |
| 6.500000 | 96.361439  | 47.367438  | 249.662092 | 40.242472  | 289.472366 | -5.1073  | 17.6025  | -7.2277  | 5.5447  | -9.8228  | 1.2372  | 2.2265           | -0.3207           |
| 6.500000 | 100.504264 | 306.337058 | 99.422604  | 69.419461  | 79.353920  | -22.2827 | 70.1818  | -35.4994 | 31.3865 | -16.3912 | 3.2100  | 30.6050          | -6.2915           |
| 6.500000 | 100.618891 | 192.324259 | 307.231123 | 37.398694  | 35.896834  | -0.0868  | 10.6513  | -4.5743  | 2.5384  | -7.6916  | 0.7320  | 1.5691           | -0.2220           |
| 6.500000 | 102.448819 | 271.417320 | 0.000000   | 102.448819 | 271.417320 | -26.1769 | 79.7310  | -44.8662 | 40.1963 | -19.1338 | 4.2066  | 33.9570          | -0.2888           |
| 6.500000 | 103.896370 | 224.194037 | 18.033172  | 86.577175  | 223.038057 | -10.5577 | 33.9783  | -17.0854 | 15.6071 | -13.2710 | 2.1978  | 10.8691          | 0.5416            |
| 6.500000 | 106.585047 | 129.097329 | 0.000000   | 106.585047 | 129.097329 | -1.3213  | 4.4213   | -1.8045  | 1.0955  | -5.7178  | 0.3759  | -2.9508          | -0.1311           |
| 6.500000 | 106.605328 | 191.755547 | 204.934749 | 79.232930  | 345.082209 | -5.2254  | 15.7120  | -6.2611  | 3.8869  | -10.0486 | 1.0652  | -0.8710          | -0.0462           |
| 6.500000 | 106.757192 | 106.653743 | 188.375978 | 49.422826  | 72.068800  | -1.9463  | 3.8565   | -2.5117  | 1.4443  | -5.4521  | 0.3687  | -4.2406          | -0.1409           |
| 6.500000 | 107.322383 | 203.512812 | 348.029195 | 30.341196  | 29.051462  | 2.4044   | 7.3150   | -3.6361  | 1.9197  | -6.6283  | 0.5537  | 1.9284           | -0.1819           |
| 6.500000 | 107.829056 | 68.641296  | 347.654382 | 130.334680 | 59.670429  | -14.7875 | 45.4685  | -20.8491 | 17.7943 | -16.2902 | 2.9121  | 14.2480          | -1.8855           |
| 6.500000 | 108.370984 | 245.563843 | 112.505158 | 99.273552  | 105.031704 | -3.9524  | 12.1736  | -5.1965  | 4.1643  | -8.5234  | 0.9375  | -0.3969          | 0.0613            |
| 6.500000 | 109.567576 | 72.358197  | 186.775462 | 94.421594  | 103.893255 | -11.1950 | 22.3734  | -8.6342  | 6.5466  | -10.5736 | 1.3520  | -0.1308          | 0.1053            |
| 6.500000 | 109.801615 | 260.749211 | 287.370499 | 94.702321  | 78.517872  | -8.6162  | 23.3207  | -12.6981 | 11.1885 | -12.1741 | 1.8049  | 2.8256           | 0.7647            |
| 6.500000 | 110.132117 | 147.451376 | 214.161856 | 134.873547 | 205.824004 | -1.2509  | 1.8346   | -0.9115  | 0.4752  | -3.2240  | 0.1597  | -2.9169          | 0.0841            |
| 6.500000 | 112.135120 | 244.054354 | 180.000000 | 67.864880  | 295.945646 | -2.3472  | 2.4896   | -1.6718  | 0.9247  | -4.8418  | 0.2623  | -5.1841          | 0.2433            |
| 6.500000 | 112.652309 | 298.632189 | 94.946285  | 50.186131  | 97.088871  | 0.8478   | 11.3663  | -4.3104  | 2.5158  | -7.8361  | 0.7238  | 3.3072           | -0.4987           |
| 6.500000 | 113.161528 | 139.502536 | 40.662497  | 52.023438  | 328.802332 | 1.7369   | 5.0003   | -2.6217  | 1.4330  | -5.9932  | 0.4322  | -0.0125          | 0.0922            |
| 6.500000 | 116.552800 | 217.980474 | 180.000000 | 63.447200  | 322.019526 | -0.9521  | 3.4396   | -2.1187  | 1.1588  | -5.4408  | 0.3455  | -3.5678          | 0.0931            |
| 6.500000 | 116.597197 | 3.593228   | 25.134074  | 9.516061   | 164.299903 | -21.0369 | 59.5190  | -28.9541 | 24.0342 | -18.9746 | 3.4534  | 18.0409          | 0.9773            |
| 6.500000 | 117.895123 | 164.601583 | 180.000000 | 62.104876  | 15.398417  | -1.0751  | 12.3480  | -5.1168  | 3.0720  | -8.4737  | 0.8657  | 1.6201           | 0.1150            |
| 6.500000 | 122.981360 | 131.105003 | 246.198688 | 102.300886 | 214.444470 | -10.3553 | 26.6561  | -13.1376 | 11.6601 | -11.8606 | 1.9117  | 4.8745           | -0.5141           |
| 6.500000 | 123.838213 | 9.928227   | 19.278781  | 22.478044  | 146.338111 | -7.7126  | 33.3395  | -17.3854 | 14.5187 | -15.4841 | 2.4780  | 9.7540           | 0.0896            |
| 6.500000 | 124.518216 | 329.304131 | 180.000000 | 55.481784  | 210.695869 | -30.8344 | 64.3790  | -30.6558 | 24.2194 | -19.9471 | 3.5146  | 10.6758          | 0.2375            |
| 6.500000 | 124.526964 | 275.311938 | 287.023112 | 87.355605  | 71.118278  | -2.7480  | 9.8735   | -4.5569  | 3.2035  | -8.3982  | 0.8165  | -1.8096          | 0.2810            |
| 6.500000 | 125.326979 | 225.524713 | 0.000000   | 125.326979 | 225.524713 | -3.2121  | 3.3721   | -1.4739  | 0.6264  | -3.9237  | 0.2423  | -4.3689          | 0.1393            |
| 6.500000 | 126.038981 | 172.174468 | 0.000000   | 126.038981 | 172.174468 | -2.8545  | 2.0502   | -1.3516  | 0.5811  | -3.3489  | 0.1860  | -4.7378          | 0.1670            |
| 6.500000 | 128.795357 | 196.485691 | 333.425530 | 61.117916  | 29.322339  | 1.9530   | 8.4218   | -3.8679  | 2.1622  | -7.0521  | 0.6433  | 2.2603           | -0.0066           |
| 6.500000 | 129.735107 | 117.079518 | 21.837652  | 150.650532 | 131.384587 | -2.1253  | 0.5982   | -0.5246  | 0.0957  | -2.0037  | 0.0539  | -3.9059          | -0.1993           |
| 6.500000 | 131.264269 | 32.984948  | 180.000000 | 48.735731  | 147.015052 | -19.5113 | 37.9985  | -18.9669 | 13.8592 | -14.0710 | 2.1385  | 1.4469           | 0.3449            |
| 6.500000 | 132.061289 | 234.862930 | 151.961951 | 29.814450  | 324.573156 | 3.5643   | 3.4429   | -2.1440  | 0.7639  | -4.6624  | 0.2823  | 1.2470           | -0.1361           |
| 6.500000 | 132.324408 | 279.042881 | 102.672835 | 77.165043  | 138.526806 | -28.2051 | 94.1942  | -45.5756 | 33.0638 | -20.6931 | 3.5680  | 36.3522          | 0.0571            |
| 6.500000 | 135.000000 | 45.000000  | 45.000000  | 45.000000  | 135.000000 | -2.4283  | 23.3450  | -11.3132 | 9.1884  | -11.3390 | 1.6055  | 9.0584           | 0.2140            |
| 6.500000 | 135.960248 | 96.618787  | 0.000000   | 135.960248 | 96.618787  | -9.0284  | 20.4174  | -9.5021  | 7.1917  | -8.2018  | 1.2624  | 2.1391           | 0.0203            |
| 6.500000 | 136.730333 | 157.504458 | 42.076602  | 69.050113  | 349.300548 | 2.0545   | 13.1116  | -5.4511  | 3.1794  | -8.2201  | 0.8342  | 5.5084           | -1.0560           |
| 6.500000 | 137.142558 | 9.931965   | 211.344544 | 52.513934  | 145.767418 | -12.0354 | 17.7546  | -9.3984  | 6.1372  | -11.5386 | 1.3197  | -7.7609          | -0.1247           |
| 6.500000 | 138.654749 | 141.326083 | 23.289026  | 63.910230  | 327.134810 | 3.1385   | 4.5658   | -2.4352  | 1.0677  | -5.5639  | 0.3673  | 1.1402           | 0.0941            |
| 6.500000 | 138.728453 | 292.815974 | 258.840567 | 123.446494 | 50.681724  | -41.2466 | 107.1272 | -51.5723 | 41.4312 | -21.9750 | 4.5150  | 38.2795          | 4.5717            |
| 6.500000 | 139.729546 | 166.312792 | 212.939416 | 112.149344 | 183.738345 | -15.0947 | 36.0969  | -17.7856 | 15.0237 | -13.0127 | 2.3550  | 7.5825           | -0.9152           |
| 6.500000 | 139.954896 | 144.949963 | 199.241846 | 115.735515 | 209.893143 | -4.0420  | 6.3263   | -2.8397  | 2.0081  | -5.6602  | 0.5339  | -3.6737          | -0.2463           |
| 6.500000 | 140.113063 | 188.492543 | 213.911792 | 48.490442  | 329.610575 | 3.1996   | 6.9747   | -3.5758  | 1.6427  | -6.1330  | 0.5248  | 2.6330           | -0.2035           |
| 6.500000 | 140.782720 | 91.856683  | 180.000000 | 39.217280  | 88.143317  | 0.7544   | 6.6714   | -4.3818  | 2.5093  | -6.2612  | 0.6252  | 2.9173           | 0.0827            |
| 6.500000 | 141.978655 | 190.429139 | 7.486735   | 64.660069  | 12.640797  | 2.9385   | 13.7438  | -6.1424  | 3.6199  | -8.1162  | 0.8567  | 6.9003           | 0.4120            |
| 6.500000 | 142.594799 | 243.533806 | 13.092486  | 119.636053 | 249.505282 | -4.9075  | 10.5275  | -4.2725  | 2.7395  | -6.8614  | 0.7514  | -2.0231          | -0.1608           |
| 6.500000 | 143.861890 | 12.707657  | 33.454380  | 132.217886 | 40.863495  | -8.4922  | 20.0646  | -9.9313  | 7.3951  | -11.6155 | 1.5551  | -1.0243          | 0.0216            |
| 6.500000 | 145.530485 | 282.935107 | 83.339774  | 63.603795  | 135.959468 | -11.8017 | 47.0157  | -19.5066 | 15.3340 | -14.5766 | 2.4275  | 18.8923          | 1.0479            |
| 6.500000 | 146.250508 | 125.944622 | 180.000000 | 33.749492  | 54.055378  | 4.0806   | 4.1450   | -2.4129  | 0.8588  | -4.7792  | 0.3126  | 2.2049           | 0.4833            |
| 6.500000 | 152.433504 | 286.723639 | 171.888307 | 51.963101  | 262.494366 | -0.5109  | 12.6055  | -5.2742  | 3.1758  | -6.8230  | 0.7330  | 3.9064           | 0.5567            |
| 6.500000 | 153.141163 | 340.302144 | 224.524214 | 122.940586 | 36.281971  | -15.2323 | 26.7783  | -12.2198 | 9.4213  | -13.1209 | 1.8405  | -2.5330          | -0.1956           |
| 6.500000 | 154.981718 | 260.870327 | 180.000000 | 25.018282  | 279.129673 | 4.1553   | 7.5529   | -3.8274  | 1.6576  | -5.3573  | 0.4433  | 4.6244           | 0.8004            |
| 6.500000 | 156.230851 | 270.537707 | 290.263971 | 94.742599  | 40.131139  | -9.0280  | 25.2431  | -13.5038 | 10.6848 | -11.2551 | 1.6834  | 3.8243           | -0.1409           |
| 6.500000 | 163.927057 | 175.625996 | 347.306616 | 86.726525  | 346.216854 | -1.4337  | 12.5426  | -5.6134  | 3.2307  | -7.6588  | 0.7802  | 1.8475           | 0.1051            |
| 6.500000 | 164.620920 | 99.786717  | 180.000000 | 15.379080  | 80.213283  | 5.6975   | 3.4041   | -2.3341  | 0.6839  | -4.1882  | 0.2481  | 3.5114           | -0.3144           |
| 6.500000 | 167.305818 | 183.487761 | 111.379063 | 26.772731  | 59.501413  | 6.3716   | 3.7128   | -2.4475  | 0.7010  | -4.3560  | 0.2564  | 4.2382           | -0.7739           |
| 6.500000 | 168.126948 | 194.808529 | 338.354937 | 96.918412  | 12.400308  | -1.8178  | 10.1042  | -4.5090  | 2.3135  | -7.1422  | 0.6390  | -0.4124          | 0.2485            |
| 6.500000 | 170.868928 | 15.952891  | 236.292875 | 28.881408  | 106.857519 | 4.0466   | 4.1289   | -2.5220  | 0.9144  | -4.5937  | 0.2983  | 2.2725           | -0.2597           |
| 6.549853 | 45.236642  | 43.010758  | 215.590016 | 70.400379  | 342.085241 | -2.0990  | 2.7359   | -1.1265  | 0.5780  | -3.5674  | 0.2037  | -3.2754          | 0.0884            |
| 6.600000 | 90.000000  | 90.000000  | 270.000000 | 90.000000  | 270.000000 | -7.1097  | 25.3072  | -10.5905 | 9.0592  | -11.5434 | 1.6848  | 6.8076           | -0.5477           |
| 6.600000 | 180.000000 | 0.000000   | 0.000000   | 0.000000   | 180.000000 | 7.3722   | 3.0142   | -2.1628  | 0.5254  | -3.6933  | 0.1887  | 5.2444           | -0.0679           |
| 6.700000 | 77.129563  | 239.696506 | 283.984960 | 64.964425  | 103.986804 | -6.8680  | 20.4406  | -9.4358  | 7.7144  | -10.9335 | 1.4765  | 2.3941           | -0.4863           |
| 6.700000 | 90.000000  | 0.000000   | 0.000000   | 0.000000   | 90.000000  | -15.9612 | 31.4180  | -16.5565 | 13.4163 | -13.7329 | 2.3337  | 0.9174           | 0.1619            |
| 6.700000 | 90.000000  | 90.000000  | 90.000000  | 90.000000  | 0.000000   | -8.1991  | 22.0763  | -9.5128  | 7.4227  | -10.5202 | 1.4326  | 2.6995           | 0.1324            |
| 6.700000 | 90.000000  | 90.000000  | 180.000000 | 90.000000  | 0.000000   | -14.4494 | 30.5678  | -12.9198 | 9.9183  | -11.3716 | 1.6427  | 3.3879           | -0.3130           |

continued on next page

| $R$      | $\beta_A$  | $\gamma_A$ | $\alpha_B$ | $\beta_B$  | $\gamma_B$ | elst     | exch    | ind      | ex-ind  | disp     | ex-disp | $E_{\text{int}}$ | $E_{\text{diff}}$ |
|----------|------------|------------|------------|------------|------------|----------|---------|----------|---------|----------|---------|------------------|-------------------|
| 6.700000 | 90.000000  | 90.000000  | 270.000000 | 90.000000  | 0.000000   | -6.2423  | 20.0913 | -8.5258  | 6.6514  | -10.0575 | 1.2629  | 3.1801           | -0.6329           |
| 6.800000 | 0.000000   | 0.000000   | 0.000000   | 90.000000  | 180.000000 | -0.0967  | 1.5263  | -0.7159  | 0.4544  | -2.9318  | 0.1429  | -1.6207          | -0.0366           |
| 6.800000 | 0.000000   | 0.000000   | 90.000000  | 90.000000  | 180.000000 | -0.7720  | 3.0646  | -1.3597  | 1.0345  | -3.7769  | 0.2727  | -1.5368          | -0.4292           |
| 6.800000 | 15.340644  | 195.040002 | 177.446206 | 62.270145  | 198.045933 | -6.8590  | 25.8180 | -10.6956 | 9.7249  | -9.9957  | 1.6739  | 9.6665           | 0.0209            |
| 6.800000 | 45.000000  | 45.000000  | 135.000000 | 135.000000 | 135.000000 | 0.9331   | 0.2481  | -0.1475  | 0.0450  | -1.1260  | 0.0236  | -0.0236          | 0.0522            |
| 6.800000 | 52.885098  | 168.966453 | 14.543465  | 154.646868 | 29.185659  | -5.2747  | 21.9009 | -9.3652  | 8.7080  | -8.8659  | 1.4448  | 8.5479           | 0.7448            |
| 6.800000 | 78.926032  | 173.472520 | 204.824926 | 96.725822  | 13.265282  | -11.1498 | 18.4994 | -6.9375  | 4.6519  | -9.8278  | 1.1084  | -3.6553          | -0.0589           |
| 6.800000 | 90.000000  | 90.000000  | 0.000000   | 90.000000  | 0.000000   | -0.4446  | 13.2562 | -5.3681  | 4.0575  | -8.4408  | 0.9437  | 4.0039           | -0.6512           |
| 6.800000 | 90.000000  | 90.000000  | 90.000000  | 90.000000  | 90.000000  | -6.7601  | 18.2061 | -8.5694  | 7.6905  | -9.0364  | 1.2892  | 2.8199           | -0.1797           |
| 6.800000 | 90.000000  | 90.000000  | 90.000000  | 90.000000  | 270.000000 | -14.2521 | 31.7046 | -19.3271 | 17.6554 | -11.8398 | 2.1219  | 6.0630           | -1.3365           |
| 6.800000 | 108.268956 | 227.990388 | 313.201516 | 43.058753  | 62.487613  | 1.9759   | 1.2824  | -1.0181  | 0.3437  | -3.3591  | 0.1346  | -0.6406          | 0.0663            |
| 6.800000 | 121.551323 | 222.058840 | 180.000000 | 58.448677  | 317.941160 | 0.4438   | 1.0913  | -0.9287  | 0.3019  | -3.1605  | 0.1202  | -2.1321          | -0.0969           |
| 6.800000 | 131.738216 | 302.650014 | 346.602709 | 109.587100 | 292.830091 | -6.3078  | 24.3242 | -11.3194 | 9.7113  | -11.5035 | 1.7910  | 6.6958           | -0.6859           |
| 6.800000 | 135.000000 | 45.000000  | 45.000000  | 135.000000 | 45.000000  | -8.2295  | 21.1572 | -10.0482 | 7.8946  | -9.9111  | 1.5184  | 2.3815           | 0.4109            |
| 6.800000 | 135.000000 | 45.000000  | 135.000000 | 135.000000 | 45.000000  | -16.9102 | 34.1942 | -19.6108 | 17.8491 | -12.7162 | 2.4033  | 5.2095           | 0.5138            |
| 6.800000 | 152.789306 | 129.100846 | 234.502474 | 87.260372  | 210.858624 | -11.6670 | 28.5269 | -12.2252 | 9.3545  | -11.4868 | 1.8260  | 4.3285           | -1.2940           |
| 6.800000 | 180.000000 | 0.000000   | 0.000000   | 0.000000   | 0.000000   | 5.8303   | 1.4448  | -1.3889  | 0.2437  | -2.6663  | 0.1012  | 3.5648           | 0.1880            |
| 6.900000 | 0.000000   | 0.000000   | 180.000000 | 90.000000  | 180.000000 | -0.6195  | 3.7047  | -1.6457  | 1.2981  | -4.2136  | 0.3421  | -1.1338          | 0.1959            |
| 6.900000 | 45.000000  | 135.000000 | 45.000000  | 45.000000  | 135.000000 | -8.7106  | 20.7608 | -8.7030  | 7.0479  | -8.3687  | 1.2682  | 3.2947           | 1.2313            |
| 6.900000 | 58.626782  | 174.054617 | 207.486287 | 115.224283 | 22.026042  | -10.8444 | 29.7224 | -11.0934 | 10.0611 | -12.4703 | 1.8482  | 7.2236           | -1.4314           |
| 6.900000 | 80.494270  | 85.340679  | 180.000000 | 99.505730  | 94.659321  | -12.1024 | 27.3526 | -11.9466 | 10.8884 | -10.3683 | 1.7149  | 5.5385           | -0.9863           |
| 6.900000 | 90.000000  | 0.000000   | 0.000000   | 0.000000   | 180.000000 | -16.1035 | 31.2859 | -14.2909 | 11.1618 | -11.5795 | 2.0211  | 2.4949           | 0.5564            |
| 6.900000 | 90.000000  | 90.000000  | 0.000000   | 0.000000   | 0.000000   | -1.9041  | 2.6780  | -1.7522  | 0.6980  | -3.7974  | 0.2392  | -3.8386          | -0.0034           |
| 6.900000 | 90.420384  | 358.489876 | 232.059589 | 19.761823  | 323.504456 | -11.0456 | 19.9198 | -9.6540  | 7.4371  | -10.7206 | 1.6191  | -2.4442          | -0.1340           |
| 6.900000 | 97.982017  | 306.372973 | 196.844368 | 62.907327  | 225.611445 | -8.8094  | 12.5062 | -4.5549  | 3.0104  | -7.9472  | 0.8298  | -4.9651          | 0.0343            |
| 6.943626 | 143.861890 | 12.707657  | 33.454380  | 132.217886 | 40.863495  | -3.0315  | 5.1213  | -2.8512  | 1.5392  | -5.7010  | 0.4659  | -4.4572          | -0.3073           |
| 7.000000 | 0.000000   | 0.000000   | 0.000000   | 0.000000   | 0.000000   | -1.9017  | 0.0583  | -0.2571  | 0.0096  | -0.9778  | 0.0069  | -3.0618          | 0.0563            |
| 7.000000 | 0.000000   | 0.000000   | 0.000000   | 90.000000  | 0.000000   | 0.3755   | 0.2859  | -0.2437  | 0.0443  | -1.5942  | 0.0277  | -1.1046          | 0.1604            |
| 7.000000 | 0.000000   | 0.000000   | 0.000000   | 90.000000  | 90.000000  | 0.3477   | 0.3487  | -0.2413  | 0.0724  | -1.6042  | 0.0371  | -1.0395          | 0.0547            |
| 7.000000 | 27.975184  | 222.940928 | 156.291557 | 131.529174 | 295.198928 | 0.2141   | 2.4133  | -1.0116  | 0.7479  | -3.2521  | 0.2240  | -0.6645          | -0.1779           |
| 7.000000 | 29.387152  | 39.370209  | 202.262819 | 75.098244  | 331.672406 | -1.0879  | 0.2170  | -0.2322  | 0.0338  | -1.3324  | 0.0197  | -2.3819          | -0.1811           |
| 7.000000 | 29.387152  | 39.370209  | 202.262819 | 75.098244  | 331.672406 | -1.0878  | 0.2170  | -0.2322  | 0.0338  | -1.3324  | 0.0197  | -2.3819          | -0.1811           |
| 7.000000 | 45.000000  | 45.000000  | 45.000000  | 45.000000  | 135.000000 | -1.3131  | 0.3485  | -0.3535  | 0.0463  | -1.6141  | 0.0322  | -2.8536          | 0.0429            |
| 7.000000 | 45.000000  | 45.000000  | 45.000000  | 135.000000 | 45.000000  | 0.3416   | 1.1060  | -0.4521  | 0.2641  | -2.3925  | 0.1016  | -1.0313          | -0.1303           |
| 7.000000 | 52.506283  | 34.763197  | 43.838943  | 111.622660 | 223.105736 | -0.6240  | 5.4173  | -1.7972  | 1.4436  | -3.6377  | 0.3816  | 1.1836           | -1.2335           |
| 7.000000 | 81.671183  | 162.444532 | 223.638285 | 166.525426 | 218.035092 | -0.6721  | 0.0878  | -0.1741  | 0.0130  | -1.2228  | 0.0095  | -1.9586          | -0.0815           |
| 7.000000 | 89.393632  | 234.380808 | 113.528542 | 131.109999 | 113.339357 | -1.1305  | 2.0525  | -0.9104  | 0.5972  | -3.3824  | 0.1960  | -2.5777          | -0.0753           |
| 7.000000 | 90.000000  | 0.000000   | 0.000000   | 0.000000   | 0.000000   | -16.9926 | 30.8580 | -13.5571 | 10.4099 | -10.7933 | 1.8912  | 1.8161           | 0.5250            |
| 7.000000 | 90.000000  | 180.000000 | 0.000000   | 0.000000   | 0.000000   | 0.5000   | 1.4043  | -1.1536  | 0.2307  | -3.0661  | 0.1166  | -1.9680          | -0.1556           |
| 7.000000 | 90.000000  | 180.000000 | 90.000000  | 90.000000  | 0.000000   | 0.9006   | 5.9880  | -2.3345  | 1.1319  | -5.7233  | 0.3843  | 0.3470           | 0.0956            |
| 7.000000 | 97.239603  | 59.157214  | 12.332528  | 75.554587  | 61.199728  | 1.3243   | 1.7255  | -0.8738  | 0.3833  | -3.7268  | 0.1565  | -1.0110          | -0.0312           |
| 7.000000 | 97.803762  | 215.755776 | 180.000000 | 82.196238  | 324.244224 | -2.9341  | 2.0450  | -1.2464  | 0.5469  | -4.2092  | 0.2083  | -5.5896          | -0.0273           |
| 7.000000 | 102.448819 | 271.417320 | 0.000000   | 102.448819 | 271.417320 | -3.1797  | 16.8621 | -7.9000  | 7.1289  | -7.7855  | 1.1866  | 6.3124           | 0.6559            |
| 7.000000 | 104.308972 | 234.148849 | 303.793958 | 55.899948  | 49.989063  | 1.2722   | 0.7617  | -0.6957  | 0.2032  | -2.8273  | 0.0870  | -1.1989          | 0.0366            |
| 7.000000 | 108.150624 | 202.758704 | 180.000000 | 71.849376  | 337.241296 | -1.6118  | 1.8819  | -1.1646  | 0.3590  | -3.7132  | 0.1678  | -4.0809          | -0.1070           |
| 7.000000 | 117.405477 | 127.653940 | 200.980538 | 44.030741  | 42.389158  | 1.2043   | 0.5094  | -0.6509  | 0.1287  | -2.2992  | 0.0601  | -1.0475          | -0.1733           |
| 7.000000 | 121.376328 | 143.341280 | 227.256700 | 114.792860 | 229.047950 | -1.6651  | 1.3280  | -0.7379  | 0.2510  | -2.8214  | 0.1121  | -3.5334          | -0.0850           |
| 7.000000 | 126.158624 | 333.191361 | 70.574116  | 46.179818  | 111.419903 | 0.4518   | 12.3213 | -5.3669  | 4.0392  | -7.4015  | 0.9214  | 4.9653           | 0.9357            |
| 7.000000 | 127.704139 | 256.782821 | 296.996640 | 85.290675  | 39.984254  | 0.3252   | 1.6935  | -1.0665  | 0.5358  | -3.4183  | 0.1731  | -1.7573          | 0.1651            |
| 7.000000 | 135.000000 | 45.000000  | 135.000000 | 135.000000 | 135.000000 | -1.0639  | 0.6735  | -0.4289  | 0.1322  | -2.0616  | 0.0614  | -2.6872          | -0.2164           |
| 7.000000 | 135.000000 | 135.000000 | 135.000000 | 135.000000 | 135.000000 | -1.8538  | 0.3089  | -0.3074  | 0.0479  | -1.4181  | 0.0280  | -3.1945          | 0.1345            |
| 7.000000 | 143.699250 | 281.814384 | 253.262217 | 117.058974 | 18.130570  | -9.2140  | 17.8555 | -8.2555  | 5.8332  | -7.3292  | 1.0239  | -0.0862          | 0.0883            |
| 7.000000 | 146.115961 | 279.807332 | 355.873567 | 121.386766 | 274.050749 | -9.8847  | 23.6794 | -11.0776 | 8.5122  | -7.9502  | 1.3794  | 4.6585           | 0.5279            |
| 7.000000 | 146.536840 | 77.733736  | 78.909427  | 97.551679  | 309.001475 | -3.3611  | 7.8373  | -4.4803  | 3.3508  | -5.8517  | 0.6402  | -1.8649          | -0.2586           |
| 7.000000 | 155.229456 | 313.357539 | 71.201428  | 68.011089  | 138.684696 | -0.8006  | 9.7375  | -4.2629  | 2.8528  | -6.5168  | 0.7237  | 1.7337           | 0.6658            |
| 7.000000 | 161.968501 | 69.385966  | 11.865985  | 137.683973 | 82.721725  | -3.6259  | 2.4472  | -1.4496  | 0.6486  | -3.1883  | 0.2236  | -4.9444          | -0.2352           |
| 7.000000 | 165.482956 | 237.073917 | 108.107856 | 81.824443  | 183.234791 | -14.7000 | 29.4038 | -13.8922 | 10.8413 | -11.3894 | 1.9526  | 2.2160           | 0.2626            |
| 7.100000 | 0.000000   | 0.000000   | 180.000000 | 90.000000  | 90.000000  | -0.4428  | 0.0396  | -0.1340  | 0.0069  | -1.0620  | 0.0056  | -1.5867          | -0.0924           |
| 7.100000 | 42.198447  | 135.539694 | 0.000000   | 42.198447  | 135.539694 | -4.1385  | 7.4221  | -3.2331  | 2.0337  | -4.9076  | 0.5217  | -2.3016          | 0.0831            |
| 7.100000 | 45.000000  | 135.000000 | 135.000000 | 135.000000 | 45.000000  | -7.2470  | 24.6768 | -11.8011 | 11.2516 | -9.0814  | 1.7831  | 9.5819           | 1.3804            |
| 7.100000 | 80.631220  | 255.279871 | 8.032994   | 56.860817  | 249.465243 | -0.2939  | 7.0565  | -2.8590  | 1.9783  | -5.4725  | 0.5178  | 0.9272           | -0.3639           |
| 7.100000 | 90.000000  | 0.000000   | 0.000000   | 90.000000  | 90.000000  | -10.6609 | 25.6667 | -13.3406 | 12.1028 | -11.8693 | 2.0347  | 3.9335           | 0.3938            |
| 7.100000 | 102.448819 | 271.417320 | 0.000000   | 102.448819 | 271.417320 | -1.6517  | 12.2543 | -5.6001  | 4.9532  | -6.5367  | 0.9007  | 4.3197           | 0.5784            |
| 7.100000 | 135.000000 | 45.000000  | 135.000000 | 45.000000  | 45.000000  | 0.1947   | 0.9277  | -0.8991  | 0.1933  | -2.5785  | 0.0913  | -2.0705          | -0.1095           |
| 7.200000 | 0.000000   | 0.000000   | 0.000000   | 180.000000 | 0.000000   | 1.0045   | 0.0041  | -0.0427  | 0.0005  | -0.4586  | 0.0006  | 0.5085           | -0.1022           |
| 7.200000 | 0.000000   | 0.000000   | 180.000000 | 90.000000  | 0.000000   | -0.6839  | 0.0544  | -0.1793  | 0.0075  | -1.0504  | 0.0064  | -1.8454          | 0.1464            |

continued on next page

| $R$      | $\beta_A$  | $\gamma_A$ | $\alpha_B$ | $\beta_B$  | $\gamma_B$ | elst     | exch    | ind      | ex-ind  | disp     | ex-disp | $E_{\text{int}}$ | $E_{\text{diff}}$ |
|----------|------------|------------|------------|------------|------------|----------|---------|----------|---------|----------|---------|------------------|-------------------|
| 7.200000 | 30.526642  | 175.582130 | 220.086395 | 139.428567 | 40.437647  | 0.5809   | 1.8950  | -0.8007  | 0.5205  | -2.7278  | 0.1787  | -0.3534          | 0.0041            |
| 7.200000 | 45.000000  | 45.000000  | 45.000000  | 45.000000  | 45.000000  | -1.6868  | 0.1463  | -0.2757  | 0.0177  | -1.1608  | 0.0146  | -2.9447          | 0.0153            |
| 7.200000 | 45.000000  | 45.000000  | 45.000000  | 45.000000  | 45.000000  | -1.6868  | 0.1463  | -0.2757  | 0.0177  | -1.1608  | 0.0146  | -2.9447          | 0.0153            |
| 7.200000 | 85.783411  | 230.004768 | 106.265646 | 146.709078 | 84.051029  | -1.8333  | 5.7256  | -2.4402  | 2.0082  | -4.0829  | 0.4519  | -0.1708          | -0.0375           |
| 7.200000 | 90.000000  | 0.000000   | 180.000000 | 90.000000  | 0.000000   | -13.0742 | 34.6581 | -14.6440 | 12.7889 | -13.3293 | 2.3768  | 8.7762           | 1.0925            |
| 7.200000 | 113.961106 | 43.865354  | 93.195234  | 145.897847 | 278.651839 | -8.4598  | 26.3056 | -12.4671 | 11.6943 | -9.2446  | 1.8691  | 9.6975           | 0.1033            |
| 7.200000 | 131.620340 | 315.122197 | 161.712968 | 67.978962  | 237.556912 | -3.9934  | 2.4492  | -1.3354  | 0.4677  | -3.5977  | 0.2002  | -5.8094          | 0.1131            |
| 7.200000 | 166.914647 | 120.656676 | 220.846324 | 87.429118  | 206.074782 | -9.4651  | 17.3115 | -8.0586  | 5.5724  | -7.3941  | 1.1251  | -0.9089          | -0.5610           |
| 7.292291 | 97.982017  | 306.372973 | 196.844368 | 62.907327  | 225.611445 | -4.9150  | 3.5133  | -1.3926  | 0.6740  | -4.2607  | 0.2717  | -6.1095          | -0.0357           |
| 7.292375 | 90.420384  | 358.489876 | 232.059589 | 19.761823  | 323.504456 | -6.1469  | 6.6590  | -3.3261  | 2.0099  | -5.7131  | 0.6042  | -5.9129          | 0.0128            |
| 7.300000 | 98.554589  | 241.861990 | 296.705317 | 59.550224  | 60.367812  | 0.3544   | 0.3526  | -0.4599  | 0.1055  | -2.0699  | 0.0433  | -1.6740          | -0.0952           |
| 7.400000 | 90.000000  | 0.000000   | 0.000000   | 90.000000  | 0.000000   | -6.2265  | 15.8615 | -6.6065  | 5.2339  | -8.4441  | 1.1990  | 1.0173           | -0.0307           |
| 7.400000 | 90.000000  | 0.000000   | 90.000000  | 90.000000  | 0.000000   | -7.5740  | 18.7899 | -7.5575  | 5.8467  | -9.1195  | 1.3422  | 1.7278           | 0.5580            |
| 7.400000 | 90.000000  | 90.000000  | 0.000000   | 0.000000   | 180.000000 | 0.5613   | 0.5783  | -0.6422  | 0.1242  | -1.8715  | 0.0567  | -1.1931          | 0.3147            |
| 7.500000 | 0.000000   | 0.000000   | 0.000000   | 0.000000   | 180.000000 | -1.6269  | 0.0135  | -0.1429  | 0.0021  | -0.5899  | 0.0017  | -2.3423          | -0.0155           |
| 7.500000 | 0.000000   | 0.000000   | 90.000000  | 90.000000  | 270.000000 | 0.0033   | 0.0556  | -0.1108  | 0.0127  | -0.8411  | 0.0070  | -0.8732          | 0.0657            |
| 7.500000 | 10.229764  | 230.533091 | 331.967705 | 33.512601  | 259.982441 | -1.5409  | 0.0354  | -0.1971  | 0.0058  | -0.7227  | 0.0042  | -2.4153          | -0.0010           |
| 7.500000 | 12.517717  | 277.527859 | 83.116866  | 104.229433 | 355.373530 | -0.3093  | 0.0837  | -0.1467  | 0.0121  | -0.9609  | 0.0091  | -1.3120          | 0.1327            |
| 7.500000 | 45.000000  | 45.000000  | 135.000000 | 45.000000  | 135.000000 | -0.4814  | 0.6003  | -0.3092  | 0.1248  | -1.4320  | 0.0509  | -1.4467          | -0.1699           |
| 7.500000 | 45.236642  | 43.010758  | 215.590016 | 70.400379  | 342.085241 | -1.0933  | 0.1245  | -0.1939  | 0.0165  | -1.0367  | 0.0117  | -2.1711          | -0.1640           |
| 7.500000 | 50.599977  | 196.174792 | 201.009517 | 22.666173  | 155.246366 | -3.7337  | 0.4628  | -0.5449  | 0.0692  | -2.0079  | 0.0451  | -5.7093          | 0.0552            |
| 7.500000 | 67.113051  | 108.432073 | 180.000000 | 112.886949 | 71.567927  | -9.0064  | 20.0738 | -11.1150 | 10.6337 | -9.3350  | 1.6250  | 2.8760           | -0.3570           |
| 7.500000 | 69.062722  | 261.502715 | 106.588399 | 96.914147  | 62.352267  | -3.4071  | 8.9631  | -4.3499  | 3.7680  | -5.8382  | 0.7408  | -0.1234          | -0.4480           |
| 7.500000 | 80.494270  | 85.340679  | 180.000000 | 99.505730  | 94.659321  | -3.2099  | 4.3804  | -1.5985  | 1.3012  | -3.8191  | 0.3524  | -2.5934          | -0.1118           |
| 7.500000 | 90.000000  | 0.000000   | 180.000000 | 90.000000  | 90.000000  | -11.2646 | 27.5951 | -14.6513 | 13.8207 | -10.6398 | 2.0815  | 6.9417           | -0.0042           |
| 7.500000 | 90.000000  | 90.000000  | 0.000000   | 90.000000  | 90.000000  | 0.5214   | 8.1884  | -3.4001  | 2.9947  | -4.5826  | 0.5749  | 4.2966           | -0.2018           |
| 7.500000 | 90.000000  | 90.000000  | 0.000000   | 90.000000  | 270.000000 | 0.3192   | 7.0320  | -2.6735  | 2.3194  | -4.1681  | 0.4938  | 3.3227           | -0.3602           |
| 7.500000 | 90.000000  | 180.000000 | 0.000000   | 90.000000  | 0.000000   | 4.1155   | 1.3645  | -0.7379  | 0.2079  | -2.8341  | 0.1002  | 2.2160           | -0.4134           |
| 7.500000 | 102.448819 | 271.417320 | 0.000000   | 102.448819 | 271.417320 | 0.9989   | 3.3556  | -1.4731  | 1.0991  | -3.3451  | 0.2841  | 0.9195           | 0.2516            |
| 7.500000 | 102.482834 | 20.165759  | 265.934958 | 36.607245  | 283.048193 | -6.6308  | 14.6109 | -6.4410  | 4.6561  | -6.4400  | 0.9555  | 0.7108           | -0.1284           |
| 7.500000 | 131.733633 | 123.437859 | 47.850900  | 74.725529  | 332.270502 | 1.9295   | 0.1653  | -0.3610  | 0.0325  | -1.4638  | 0.0197  | 0.3222           | -0.0119           |
| 7.500000 | 135.000000 | 45.000000  | 45.000000  | 45.000000  | 135.000000 | 3.0776   | 1.1307  | -0.8128  | 0.2901  | -2.4511  | 0.1066  | 1.3411           | 0.0097            |
| 7.600000 | 45.000000  | 135.000000 | 45.000000  | 135.000000 | 45.000000  | -5.5811  | 23.2419 | -10.6068 | 10.0480 | -7.7731  | 1.5188  | 10.8476          | 0.9556            |
| 7.600000 | 90.000000  | 0.000000   | 90.000000  | 90.000000  | 270.000000 | -7.1514  | 20.5220 | -8.9540  | 8.0129  | -7.8538  | 1.3763  | 5.9519           | -0.0695           |
| 7.600000 | 135.000000 | 135.000000 | 45.000000  | 135.000000 | 45.000000  | -2.2650  | 0.9302  | -0.6837  | 0.1807  | -2.0328  | 0.0910  | -3.7795          | 0.0271            |
| 7.600000 | 143.699250 | 281.814384 | 253.262217 | 117.058974 | 18.130570  | -3.6014  | 2.4291  | -1.2316  | 0.5205  | -2.6409  | 0.1833  | -4.3409          | -0.0119           |
| 7.700000 | 45.000000  | 135.000000 | 45.000000  | 45.000000  | 135.000000 | -1.5248  | 1.4577  | -0.7443  | 0.3294  | -2.1934  | 0.1232  | -2.5522          | 0.1825            |
| 7.700000 | 45.000000  | 135.000000 | 135.000000 | 45.000000  | 45.000000  | -2.5510  | 0.7676  | -0.5379  | 0.1729  | -1.8683  | 0.0805  | -3.9362          | -0.1088           |
| 7.700000 | 45.000000  | 135.000000 | 135.000000 | 135.000000 | 135.000000 | 0.5715   | 0.2568  | -0.1644  | 0.0504  | -1.0543  | 0.0278  | -0.3121          | -0.0606           |
| 7.700000 | 90.000000  | 0.000000   | 90.000000  | 90.000000  | 90.000000  | -6.5069  | 19.9564 | -9.6240  | 8.6840  | -7.7667  | 1.4317  | 6.1746           | 0.3951            |
| 7.700000 | 135.000000 | 45.000000  | 45.000000  | 135.000000 | 45.000000  | -1.0758  | 1.3084  | -0.8460  | 0.2894  | -2.3752  | 0.1249  | -2.5743          | 0.0926            |
| 7.750000 | 143.861890 | 12.707657  | 33.454380  | 132.217886 | 40.863495  | -0.8174  | 0.4053  | -0.5192  | 0.0905  | -1.7991  | 0.0461  | -2.5937          | 0.0030            |
| 7.800000 | 0.000000   | 0.000000   | 90.000000  | 90.000000  | 180.000000 | 0.6072   | 0.1434  | -0.1385  | 0.0290  | -1.0335  | 0.0167  | -0.3757          | 0.0371            |
| 7.800000 | 45.000000  | 45.000000  | 135.000000 | 135.000000 | 45.000000  | 0.6473   | 0.0401  | -0.0865  | 0.0060  | -0.7079  | 0.0049  | -0.0961          | -0.1148           |
| 7.800000 | 45.000000  | 135.000000 | 45.000000  | 45.000000  | 45.000000  | -1.9980  | 0.7053  | -0.5318  | 0.1274  | -1.6838  | 0.0652  | -3.3157          | -0.1624           |
| 7.800000 | 90.000000  | 90.000000  | 270.000000 | 90.000000  | 270.000000 | 0.6813   | 0.6582  | -0.3400  | 0.1359  | -1.8167  | 0.0639  | -0.6175          | -0.1932           |
| 7.800000 | 180.000000 | 0.000000   | 0.000000   | 0.000000   | 90.000000  | 4.2000   | 0.0452  | -0.4114  | 0.0073  | -0.7581  | 0.0045  | 3.0875           | 0.1138            |
| 8.000000 | 0.000000   | 0.000000   | 0.000000   | 0.000000   | 90.000000  | -1.4655  | 0.0023  | -0.1079  | 0.0004  | -0.3730  | 0.0004  | -1.9433          | -0.0325           |
| 8.000000 | 0.000000   | 0.000000   | 0.000000   | 90.000000  | 180.000000 | 0.6767   | 0.0414  | -0.0909  | 0.0079  | -0.7197  | 0.0055  | -0.0791          | 0.1560            |
| 8.000000 | 0.000000   | 0.000000   | 90.000000  | 90.000000  | 0.000000   | -0.2994  | 0.0063  | -0.0840  | 0.0010  | -0.5054  | 0.0009  | -0.8805          | 0.0385            |
| 8.000000 | 0.000000   | 0.000000   | 90.000000  | 90.000000  | 90.000000  | 0.0033   | 0.0066  | -0.0636  | 0.0011  | -0.4766  | 0.0010  | -0.5283          | -0.0531           |
| 8.000000 | 0.000000   | 0.000000   | 180.000000 | 90.000000  | 180.000000 | 0.8343   | 0.1204  | -0.1274  | 0.0241  | -0.9621  | 0.0149  | -0.0958          | 0.1732            |
| 8.000000 | 8.596947   | 83.130018  | 244.316097 | 98.769969  | 334.717385 | -0.3652  | 0.0068  | -0.0799  | 0.0009  | -0.5243  | 0.0010  | -0.9609          | -0.0167           |
| 8.000000 | 8.759236   | 130.662423 | 136.187337 | 65.629709  | 194.187098 | 0.7159   | 0.2448  | -0.2149  | 0.0469  | -1.1750  | 0.0280  | -0.3543          | 0.1866            |
| 8.000000 | 13.138499  | 290.372962 | 360.000000 | 13.138499  | 290.372962 | -1.4996  | 0.0036  | -0.1206  | 0.0006  | -0.3801  | 0.0005  | -1.9956          | -0.0582           |
| 8.000000 | 13.740451  | 22.493003  | 5.019652   | 91.284163  | 198.573686 | 0.5849   | 0.0275  | -0.0759  | 0.0049  | -0.5988  | 0.0036  | -0.0537          | 0.2296            |
| 8.000000 | 15.340644  | 195.040002 | 177.446206 | 62.270145  | 198.045933 | 0.5809   | 0.5663  | -0.3223  | 0.1009  | -1.5265  | 0.0560  | -0.5447          | -0.0929           |
| 8.000000 | 19.351586  | 80.453534  | 0.000000   | 19.351586  | 80.453534  | -1.5588  | 0.0086  | -0.1349  | 0.0012  | -0.4130  | 0.0011  | -2.0958          | -0.0118           |
| 8.000000 | 25.817151  | 128.499906 | 290.313904 | 119.235591 | 342.406001 | 0.5243   | 0.1307  | -0.1421  | 0.0178  | -1.0544  | 0.0147  | -0.5090          | -0.0453           |
| 8.000000 | 27.975184  | 222.940928 | 156.291557 | 131.529174 | 295.198928 | 0.8369   | 0.1697  | -0.1485  | 0.0325  | -0.9589  | 0.0188  | -0.0495          | 0.0506            |
| 8.000000 | 28.272226  | 180.103173 | 180.000000 | 151.727774 | 359.896827 | 1.0147   | 0.0361  | -0.0965  | 0.0049  | -0.6359  | 0.0044  | 0.3277           | -0.0673           |
| 8.000000 | 28.831759  | 22.225265  | 219.199012 | 79.930228  | 359.170590 | -0.4986  | 0.0015  | -0.0721  | 0.0003  | -0.4076  | 0.0003  | -0.9762          | -0.1799           |
| 8.000000 | 31.766957  | 40.754324  | 52.752985  | 23.076839  | 355.951514 | -1.4589  | 0.0046  | -0.1093  | 0.0006  | -0.3836  | 0.0006  | -1.9460          | -0.1073           |
| 8.000000 | 34.188652  | 279.127380 | 180.000000 | 145.811348 | 260.872620 | 0.6129   | 0.0053  | -0.0426  | 0.0007  | -0.3784  | 0.0008  | 0.1988           | -0.0293           |
| 8.000000 | 36.772391  | 201.030942 | 329.920118 | 50.924896  | 225.963118 | -0.6152  | 0.1379  | -0.2339  | 0.0214  | -1.0459  | 0.0145  | -1.7213          | 0.0938            |
| 8.000000 | 38.798573  | 197.354376 | 0.000000   | 38.798573  | 197.354376 | -0.5824  | 0.0549  | -0.2341  | 0.0091  | -0.9697  | 0.0069  | -1.7153          | 0.0903            |

continued on next page

| $R$      | $\beta_A$  | $\gamma_A$ | $\alpha_B$ | $\beta_B$  | $\gamma_B$ | elst    | exch    | ind      | ex-ind  | disp    | ex-disp | $E_{\text{int}}$ | $E_{\text{diff}}$ |
|----------|------------|------------|------------|------------|------------|---------|---------|----------|---------|---------|---------|------------------|-------------------|
| 8.000000 | 41.325815  | 206.338056 | 39.343148  | 37.030696  | 172.504206 | -0.5900 | 0.1646  | -0.2970  | 0.0282  | -1.1474 | 0.0181  | -1.8235          | 0.1293            |
| 8.000000 | 42.198447  | 135.539694 | 0.000000   | 42.198447  | 135.539694 | -0.9793 | 0.3869  | -0.3722  | 0.0672  | -1.2803 | 0.0362  | -2.1414          | 0.0642            |
| 8.000000 | 45.000000  | 45.000000  | 45.000000  | 135.000000 | 135.000000 | 0.9106  | 0.0072  | -0.0447  | 0.0008  | -0.4158 | 0.0009  | 0.4591           | 0.1547            |
| 8.000000 | 45.000000  | 45.000000  | 135.000000 | 45.000000  | 45.000000  | -1.3924 | 0.0085  | -0.0957  | 0.0013  | -0.4875 | 0.0012  | -1.9646          | 0.0536            |
| 8.000000 | 46.595194  | 179.202766 | 209.735805 | 34.133897  | 140.993854 | -2.6126 | 0.0998  | -0.2248  | 0.0146  | -1.1192 | 0.0110  | -3.8312          | -0.0377           |
| 8.000000 | 47.597820  | 235.361897 | 180.000000 | 132.402180 | 304.638103 | 0.6866  | 1.8006  | -0.7805  | 0.5422  | -2.3090 | 0.1768  | 0.1166           | 0.4202            |
| 8.000000 | 49.619865  | 340.664642 | 167.241210 | 59.278600  | 2.358635   | -1.0348 | 0.0211  | -0.1010  | 0.0029  | -0.5784 | 0.0025  | -1.6877          | -0.0892           |
| 8.000000 | 50.139489  | 74.454496  | 81.544755  | 80.716250  | 213.669434 | -0.8301 | 5.6854  | -1.9271  | 1.5686  | -3.3800 | 0.4134  | 1.5302           | -1.3453           |
| 8.000000 | 50.599977  | 196.174792 | 201.009517 | 22.666173  | 155.246366 | -2.8620 | 0.0911  | -0.2833  | 0.0125  | -1.0801 | 0.0100  | -4.1119          | -0.0100           |
| 8.000000 | 55.799462  | 203.496852 | 44.621917  | 158.537555 | 45.457470  | 0.7259  | 0.1483  | -0.1326  | 0.0225  | -1.0279 | 0.0158  | -0.2480          | -0.1083           |
| 8.000000 | 58.477774  | 210.976988 | 158.252435 | 106.378031 | 317.192516 | -4.6333 | 12.1930 | -5.1249  | 4.7120  | -5.4033 | 0.8606  | 2.6040           | -0.3616           |
| 8.000000 | 58.908192  | 79.201189  | 245.000600 | 84.185909  | 313.169607 | -0.5961 | 0.2251  | -0.1964  | 0.0500  | -1.2420 | 0.0256  | -1.7338          | 0.1699            |
| 8.000000 | 62.032323  | 239.447754 | 0.000000   | 62.032323  | 239.447754 | 0.7584  | 0.9337  | -0.4985  | 0.1895  | -1.9913 | 0.0896  | -0.5186          | -0.0302           |
| 8.000000 | 64.722651  | 195.480678 | 335.216978 | 73.938956  | 207.212912 | -1.6613 | 15.0058 | -5.9363  | 5.4014  | -6.2061 | 0.9743  | 7.5777           | -0.7936           |
| 8.000000 | 67.051550  | 175.698387 | 180.000000 | 112.948450 | 4.301613   | -1.6330 | 0.5947  | -0.2811  | 0.0956  | -1.9404 | 0.0500  | -3.1142          | -0.0625           |
| 8.000000 | 67.568822  | 223.047221 | 90.975896  | 121.860159 | 88.490493  | -1.3824 | 7.7296  | -3.0934  | 2.7314  | -4.1226 | 0.5745  | 2.4370           | -0.0791           |
| 8.000000 | 71.019778  | 185.771849 | 298.861236 | 167.061553 | 284.654555 | -0.0275 | 0.0318  | -0.0966  | 0.0041  | -0.6587 | 0.0038  | -0.7431          | 0.1041            |
| 8.000000 | 72.143319  | 163.140130 | 274.499519 | 146.573704 | 266.341096 | -0.1932 | 0.1162  | -0.1401  | 0.0159  | -0.9536 | 0.0127  | -1.1421          | -0.0178           |
| 8.000000 | 73.669434  | 81.738146  | 80.422703  | 77.965133  | 238.316997 | -1.2402 | 0.3196  | -0.2077  | 0.0515  | -1.4190 | 0.0320  | -2.4637          | -0.0050           |
| 8.000000 | 73.944359  | 227.668488 | 100.593656 | 127.091258 | 75.289126  | -1.1002 | 5.7055  | -2.4529  | 2.0858  | -3.6871 | 0.4709  | 1.0219           | 0.2397            |
| 8.000000 | 75.341589  | 76.995567  | 6.241542   | 51.058083  | 76.949383  | 0.4370  | 0.1149  | -0.1921  | 0.0192  | -0.9734 | 0.0132  | -0.5812          | 0.2757            |
| 8.000000 | 75.398437  | 99.961501  | 173.872611 | 128.907113 | 74.380164  | -1.0330 | 3.6817  | -1.6081  | 1.3593  | -3.1680 | 0.3483  | -0.4198          | 0.8285            |
| 8.000000 | 75.718661  | 209.120443 | 180.000000 | 104.281339 | 330.879557 | -2.9852 | 2.0978  | -0.8891  | 0.6087  | -2.7131 | 0.1891  | -3.6919          | 0.0881            |
| 8.000000 | 78.610883  | 183.966041 | 0.000000   | 78.610883  | 183.966041 | 0.7680  | 4.5114  | -1.7877  | 1.1891  | -4.2701 | 0.3909  | 0.8016           | -0.0013           |
| 8.000000 | 79.236471  | 158.472518 | 67.739575  | 4.404374   | 274.067687 | -0.9138 | 0.1434  | -0.3686  | 0.0218  | -1.0645 | 0.0152  | -2.1664          | -0.0558           |
| 8.000000 | 79.976656  | 303.441692 | 119.073580 | 44.937169  | 79.144606  | -0.5823 | 0.0486  | -0.1901  | 0.0064  | -0.8072 | 0.0054  | -1.5193          | 0.1993            |
| 8.000000 | 80.631220  | 255.279871 | 8.032994   | 56.860817  | 249.465243 | 1.3028  | 0.3402  | -0.2598  | 0.0590  | -1.3937 | 0.0332  | 0.0817           | -0.0783           |
| 8.000000 | 84.398751  | 230.415868 | 180.000000 | 95.601249  | 309.584132 | -2.3808 | 0.2767  | -0.2846  | 0.0777  | -1.7065 | 0.0353  | -3.9823          | -0.1397           |
| 8.000000 | 84.891799  | 9.310996   | 24.768780  | 80.861563  | 9.024272   | -2.5288 | 2.6797  | -1.0987  | 0.5930  | -2.7982 | 0.2202  | -2.9327          | 0.3575            |
| 8.000000 | 85.783411  | 230.004768 | 106.265646 | 146.709078 | 84.051029  | -0.1804 | 0.4314  | -0.2564  | 0.0920  | -1.2355 | 0.0431  | -1.1058          | -0.0150           |
| 8.000000 | 86.057601  | 67.728231  | 67.570054  | 117.055324 | 247.914532 | -0.1974 | 0.1435  | -0.1254  | 0.0204  | -0.9895 | 0.0131  | -1.1353          | 0.0264            |
| 8.000000 | 86.776936  | 214.570422 | 360.000000 | 86.776936  | 214.570422 | 0.3567  | 1.9614  | -0.8808  | 0.6081  | -2.7076 | 0.1783  | -0.4839          | -0.6284           |
| 8.000000 | 86.817589  | 354.490138 | 186.095085 | 21.227554  | 345.777194 | -3.6173 | 1.0819  | -0.7999  | 0.2136  | -2.0334 | 0.1049  | -5.0502          | -0.1465           |
| 8.000000 | 89.393632  | 234.380808 | 113.528542 | 131.109999 | 113.339357 | -0.2828 | 0.0846  | -0.1224  | 0.0172  | -0.9216 | 0.0103  | -1.2147          | 0.1279            |
| 8.000000 | 89.402523  | 148.066340 | 21.141098  | 102.825328 | 147.524657 | 0.0356  | 0.3609  | -0.2755  | 0.0929  | -1.4964 | 0.0414  | -1.2411          | -0.0479           |
| 8.000000 | 89.410771  | 204.800914 | 203.114993 | 100.160560 | 340.236216 | -2.6632 | 0.4532  | -0.3547  | 0.0719  | -1.6873 | 0.0429  | -4.1373          | -0.0273           |
| 8.000000 | 89.458834  | 196.830725 | 307.039843 | 29.819647  | 64.848338  | 0.7173  | 0.1116  | -0.3040  | 0.0154  | -0.9958 | 0.0111  | -0.4444          | 0.0500            |
| 8.000000 | 90.000000  | 0.000000   | 0.000000   | 0.000000   | 0.000000   | -4.2224 | 1.2383  | -0.8576  | 0.2367  | -2.0590 | 0.1122  | -5.5518          | -0.0447           |
| 8.000000 | 90.000000  | 0.000000   | 0.000000   | 0.000000   | 90.000000  | -3.4552 | 0.7581  | -0.7199  | 0.1635  | -1.8567 | 0.0786  | -5.0316          | -0.0087           |
| 8.000000 | 90.000000  | 0.000000   | 0.000000   | 0.000000   | 180.000000 | -3.3989 | 1.0747  | -0.8180  | 0.2133  | -1.9953 | 0.1019  | -4.8223          | -0.0195           |
| 8.000000 | 90.000000  | 90.000000  | 0.000000   | 0.000000   | 0.000000   | -0.8303 | 0.0960  | -0.3063  | 0.0170  | -0.9037 | 0.0108  | -1.9165          | -0.1237           |
| 8.000000 | 90.000000  | 90.000000  | 0.000000   | 0.000000   | 90.000000  | 0.0857  | 0.1375  | -0.3091  | 0.0240  | -0.9327 | 0.0141  | -0.9805          | 0.0416            |
| 8.000000 | 90.000000  | 90.000000  | 0.000000   | 0.000000   | 270.000000 | -0.3687 | 0.1466  | -0.3282  | 0.0228  | -0.9449 | 0.0146  | -1.4578          | 0.0756            |
| 8.000000 | 90.000000  | 90.000000  | 0.000000   | 90.000000  | 0.000000   | 2.0490  | 0.2935  | -0.2430  | 0.0474  | -1.4285 | 0.0290  | 0.7473           | 0.1164            |
| 8.000000 | 90.000000  | 90.000000  | 90.000000  | 90.000000  | 0.000000   | -0.6529 | 0.3400  | -0.2699  | 0.0531  | -1.4327 | 0.0326  | -1.9298          | 0.2430            |
| 8.000000 | 90.000000  | 90.000000  | 180.000000 | 90.000000  | 90.000000  | -2.1368 | 0.2587  | -0.2174  | 0.0526  | -1.3168 | 0.0281  | -3.3316          | 0.0834            |
| 8.000000 | 90.000000  | 90.000000  | 180.000000 | 90.000000  | 270.000000 | -1.8675 | 0.2408  | -0.2208  | 0.0561  | -1.3037 | 0.0269  | -3.0682          | 0.0398            |
| 8.000000 | 90.000000  | 90.000000  | 270.000000 | 90.000000  | 0.000000   | 0.2707  | 0.3147  | -0.2441  | 0.0527  | -1.3954 | 0.0289  | -0.9725          | 0.0342            |
| 8.000000 | 90.000000  | 180.000000 | 0.000000   | 0.000000   | 90.000000  | 1.1830  | 0.0698  | -0.3204  | 0.0091  | -0.8959 | 0.0068  | 0.0526           | 0.0462            |
| 8.000000 | 90.000000  | 180.000000 | 0.000000   | 0.000000   | 180.000000 | 1.9249  | 0.0711  | -0.3147  | 0.0098  | -0.8985 | 0.0071  | 0.7997           | -0.0089           |
| 8.000000 | 90.000000  | 180.000000 | 180.000000 | 90.000000  | 0.000000   | -1.8909 | 0.1613  | -0.2804  | 0.0155  | -1.3037 | 0.0149  | -3.2833          | 0.1190            |
| 8.000000 | 90.011145  | 279.241108 | 108.688327 | 73.781411  | 76.788648  | 0.2372  | 0.0751  | -0.1623  | 0.0128  | -1.0141 | 0.0090  | -0.8422          | 0.0786            |
| 8.000000 | 92.251661  | 149.257560 | 240.419439 | 136.992577 | 253.792141 | -0.8331 | 0.1439  | -0.1666  | 0.0236  | -0.9640 | 0.0145  | -1.7816          | -0.0823           |
| 8.000000 | 92.985634  | 87.174525  | 180.000000 | 87.014366  | 92.825475  | -2.1377 | 0.1684  | -0.1909  | 0.0263  | -1.1850 | 0.0180  | -3.3008          | 0.0883            |
| 8.000000 | 93.378903  | 151.441111 | 43.125534  | 29.521255  | 322.000701 | 0.8181  | 0.1583  | -0.3172  | 0.0244  | -1.0266 | 0.0152  | -0.3279          | -0.0321           |
| 8.000000 | 94.225864  | 143.871740 | 200.650284 | 71.173976  | 34.759276  | -1.4062 | 0.1010  | -0.2445  | 0.0174  | -1.0846 | 0.0114  | -2.6056          | 0.1517            |
| 8.000000 | 94.243532  | 197.078778 | 180.000000 | 85.756468  | 342.921222 | -2.0116 | 0.1977  | -0.3144  | 0.0261  | -1.3074 | 0.0192  | -3.3905          | -0.0131           |
| 8.000000 | 96.047951  | 127.191286 | 164.333198 | 103.390092 | 48.949985  | -2.2177 | 0.2960  | -0.2776  | 0.0741  | -1.6014 | 0.0360  | -3.6907          | -0.0204           |
| 8.000000 | 96.361438  | 47.367438  | 249.662092 | 40.242472  | 289.472366 | -0.0256 | 0.1489  | -0.2596  | 0.0195  | -1.1252 | 0.0161  | -1.2259          | 0.0803            |
| 8.000000 | 97.239603  | 59.157214  | 12.332528  | 75.554587  | 61.199728  | 1.3622  | 0.0546  | -0.1485  | 0.0091  | -1.0202 | 0.0069  | 0.2641           | -0.1075           |
| 8.000000 | 100.504264 | 306.337058 | 99.422604  | 69.419461  | 79.353920  | 1.0433  | 0.3203  | -0.2578  | 0.0559  | -1.3056 | 0.0297  | -0.1142          | -0.2151           |
| 8.000000 | 100.618891 | 192.324259 | 307.231123 | 37.398694  | 35.896834  | 1.7005  | 0.0803  | -0.2916  | 0.0104  | -0.9304 | 0.0082  | 0.5774           | -0.0322           |
| 8.000000 | 103.896370 | 224.194037 | 18.033172  | 86.577175  | 223.038057 | 0.5750  | 0.2627  | -0.2346  | 0.0563  | -1.3612 | 0.0288  | -0.6729          | -0.1087           |
| 8.000000 | 105.731346 | 25.708875  | 81.222183  | 147.868744 | 279.018714 | 0.1349  | 2.8829  | -1.2992  | 0.9877  | -2.8284 | 0.2903  | 0.1682           | 0.3401            |
| 8.000000 | 106.312061 | 331.986177 | 0.000000   | 106.312061 | 331.986177 | -6.1906 | 28.6585 | -12.4812 | 11.5304 | -8.5621 | 1.6434  | 14.5983          | -0.6914           |
| 8.000000 | 106.585047 | 129.097329 | 0.000000   | 106.585047 | 129.097329 | 0.1347  | 0.0352  | -0.1280  | 0.0055  | -0.8432 | 0.0046  | -0.7912          | 0.1667            |

continued on next page

| $R$      | $\beta_A$  | $\gamma_A$ | $\alpha_B$ | $\beta_B$  | $\gamma_B$ | elst    | exch    | ind     | ex-ind | disp    | ex-disp | $E_{\text{int}}$ | $E_{\text{diff}}$ |
|----------|------------|------------|------------|------------|------------|---------|---------|---------|--------|---------|---------|------------------|-------------------|
| 8.000000 | 106.605328 | 191.755547 | 204.934749 | 79.232930  | 345.082209 | -0.5523 | 0.1211  | -0.2901 | 0.0144 | -1.1247 | 0.0122  | -1.8195          | -0.0799           |
| 8.000000 | 106.757192 | 106.653743 | 188.375978 | 49.422826  | 72.068800  | -0.4732 | 0.0248  | -0.1903 | 0.0064 | -0.7625 | 0.0038  | -1.3911          | 0.0602            |
| 8.000000 | 107.322383 | 203.512812 | 348.029195 | 30.341196  | 29.051462  | 2.3752  | 0.0551  | -0.2898 | 0.0088 | -0.8508 | 0.0062  | 1.3047           | -0.0394           |
| 8.000000 | 107.829056 | 68.641296  | 347.654382 | 130.334680 | 59.670429  | 0.2015  | 0.4509  | -0.2947 | 0.0745 | -1.5161 | 0.0448  | -1.0392          | 0.0247            |
| 8.000000 | 108.370984 | 245.563843 | 112.505158 | 99.273552  | 105.031704 | -0.1314 | 0.0822  | -0.1651 | 0.0154 | -0.9944 | 0.0100  | -1.1832          | 0.1053            |
| 8.000000 | 109.567576 | 72.358197  | 186.775462 | 94.421594  | 103.893255 | -1.8516 | 0.1585  | -0.1648 | 0.0205 | -1.1294 | 0.0158  | -2.9511          | 0.2215            |
| 8.000000 | 109.801615 | 260.749211 | 287.370499 | 94.702321  | 78.517872  | -0.4746 | 0.1409  | -0.2179 | 0.0333 | -1.2032 | 0.0185  | -1.7030          | 0.0293            |
| 8.000000 | 110.132117 | 147.451376 | 214.161856 | 134.873547 | 205.824004 | -0.6436 | 0.0129  | -0.0927 | 0.0022 | -0.5454 | 0.0018  | -1.2649          | -0.1163           |
| 8.000000 | 112.135120 | 244.054354 | 180.000000 | 67.864880  | 295.945646 | -0.8187 | 0.0157  | -0.1597 | 0.0046 | -0.7552 | 0.0028  | -1.7105          | 0.0156            |
| 8.000000 | 113.161528 | 139.502536 | 40.662497  | 52.023438  | 328.802332 | 1.9788  | 0.0332  | -0.2149 | 0.0059 | -0.8045 | 0.0043  | 1.0028           | 0.1031            |
| 8.000000 | 115.649763 | 25.399601  | 22.661431  | 102.792754 | 35.830257  | -3.0431 | 17.2811 | -7.7570 | 7.1347 | -6.7456 | 1.1517  | 8.0218           | -0.6462           |
| 8.000000 | 116.552800 | 217.980474 | 180.000000 | 63.447200  | 322.019526 | 0.0727  | 0.0228  | -0.1974 | 0.0053 | -0.7788 | 0.0035  | -0.8720          | 0.2707            |
| 8.000000 | 116.597197 | 3.593228   | 25.134074  | 9.516061   | 164.299903 | -0.2727 | 0.5647  | -0.5675 | 0.1260 | -1.7545 | 0.0565  | -1.8475          | 0.2651            |
| 8.000000 | 117.895123 | 164.601583 | 180.000000 | 62.104876  | 15.398417  | 1.0128  | 0.0961  | -0.3010 | 0.0119 | -0.9704 | 0.0097  | -0.1409          | -0.0538           |
| 8.000000 | 121.618720 | 298.804815 | 180.000000 | 58.381280  | 241.195185 | -1.6025 | 0.0878  | -0.2409 | 0.0104 | -0.9682 | 0.0088  | -2.7047          | 0.0796            |
| 8.000000 | 122.981360 | 131.105003 | 246.198688 | 102.300886 | 214.444470 | -0.7610 | 0.2149  | -0.2421 | 0.0406 | -1.1466 | 0.0237  | -1.8705          | 0.1110            |
| 8.000000 | 123.838213 | 9.928227   | 19.278781  | 22.478044  | 146.338111 | 1.8103  | 0.3690  | -0.4491 | 0.0862 | -1.5903 | 0.0401  | 0.2663           | 0.2609            |
| 8.000000 | 124.518216 | 329.304131 | 180.000000 | 55.481784  | 210.695869 | -4.0573 | 0.6127  | -0.6233 | 0.1431 | -1.9326 | 0.0644  | -5.7930          | 0.1787            |
| 8.000000 | 124.526964 | 275.311938 | 287.023112 | 87.355605  | 71.118278  | -0.2860 | 0.0705  | -0.2020 | 0.0123 | -0.9919 | 0.0087  | -1.3884          | 0.0189            |
| 8.000000 | 125.326979 | 225.524713 | 0.000000   | 125.326979 | 225.524713 | -1.1107 | 0.0176  | -0.1528 | 0.0018 | -0.5983 | 0.0021  | -1.8402          | 0.0848            |
| 8.000000 | 126.038981 | 172.174468 | 0.000000   | 126.038981 | 172.174468 | -1.6180 | 0.0338  | -0.1783 | 0.0051 | -0.5965 | 0.0039  | -2.3500          | -0.0297           |
| 8.000000 | 128.795357 | 196.485691 | 333.425530 | 61.117916  | 29.322339  | 2.7644  | 0.0612  | -0.2768 | 0.0088 | -0.8697 | 0.0068  | 1.6947           | 0.0082            |
| 8.000000 | 129.735107 | 117.079518 | 21.837652  | 150.650532 | 131.384587 | -1.1249 | 0.0044  | -0.1080 | 0.0006 | -0.4046 | 0.0007  | -1.6319          | -0.0559           |
| 8.000000 | 131.264269 | 32.984948  | 180.000000 | 48.735731  | 147.015052 | -3.1954 | 0.3053  | -0.4980 | 0.0562 | -1.4338 | 0.0302  | -4.7356          | -0.1832           |
| 8.000000 | 131.738216 | 302.650014 | 346.602709 | 109.587100 | 292.830091 | 0.7922  | 0.5696  | -0.4046 | 0.1269 | -1.7118 | 0.0600  | -0.5676          | 0.0195            |
| 8.000000 | 132.061289 | 234.862930 | 151.961951 | 29.814450  | 324.573156 | 2.4519  | 0.0267  | -0.2746 | 0.0044 | -0.6818 | 0.0033  | 1.5299           | -0.1104           |
| 8.000000 | 132.324408 | 279.042881 | 102.672835 | 77.165043  | 138.526806 | 0.1327  | 0.5926  | -0.3850 | 0.0725 | -1.6024 | 0.0505  | -1.1391          | 0.2467            |
| 8.000000 | 135.000000 | 135.000000 | 45.000000  | 45.000000  | 45.000000  | 3.2408  | 0.0249  | -0.2791 | 0.0038 | -0.6963 | 0.0030  | 2.2971           | -0.0046           |
| 8.000000 | 135.000000 | 135.000000 | 45.000000  | 45.000000  | 45.000000  | 3.2408  | 0.0249  | -0.2791 | 0.0038 | -0.6963 | 0.0030  | 2.2971           | -0.0046           |
| 8.000000 | 135.000000 | 135.000000 | 45.000000  | 45.000000  | 135.000000 | 2.5641  | 0.0548  | -0.2701 | 0.0109 | -0.8866 | 0.0069  | 1.4800           | 0.0467            |
| 8.000000 | 135.960248 | 96.618787  | 0.000000   | 135.960248 | 96.618787  | -1.2939 | 0.1810  | -0.2540 | 0.0276 | -0.8665 | 0.0180  | -2.1879          | 0.0867            |
| 8.000000 | 136.730333 | 157.504458 | 42.076602  | 69.050113  | 349.300548 | 2.6963  | 0.1038  | -0.3157 | 0.0126 | -0.9429 | 0.0097  | 1.5639           | -0.1547           |
| 8.000000 | 137.142558 | 9.931965   | 211.344544 | 52.513934  | 145.767418 | -3.1975 | 0.1582  | -0.4555 | 0.0345 | -1.3552 | 0.0180  | -4.7975          | -0.1697           |
| 8.000000 | 138.654749 | 141.326083 | 23.289026  | 63.910230  | 327.134810 | 2.5392  | 0.0312  | -0.2510 | 0.0051 | -0.7677 | 0.0039  | 1.5607           | 0.1075            |
| 8.000000 | 138.728453 | 292.815974 | 258.840567 | 123.446494 | 50.681724  | -2.8656 | 0.8777  | -0.5206 | 0.1812 | -1.7381 | 0.0796  | -3.9858          | 0.0935            |
| 8.000000 | 139.729546 | 166.312792 | 212.939416 | 112.149344 | 183.738345 | -2.3877 | 0.4502  | -0.3740 | 0.0771 | -1.2649 | 0.0428  | -3.4565          | 0.0591            |
| 8.000000 | 139.947098 | 301.093814 | 264.141346 | 118.516751 | 34.456410  | -2.8988 | 1.0338  | -0.5987 | 0.2067 | -1.8067 | 0.0859  | -3.9776          | 0.0456            |
| 8.000000 | 139.954896 | 144.949963 | 199.241846 | 115.735515 | 209.893143 | -1.5094 | 0.0605  | -0.1771 | 0.0086 | -0.7830 | 0.0073  | -2.3931          | 0.0780            |
| 8.000000 | 140.113063 | 188.492543 | 213.911792 | 48.490442  | 329.610575 | 2.8588  | 0.0681  | -0.3387 | 0.0094 | -0.8043 | 0.0070  | 1.8003           | -0.1275           |
| 8.000000 | 140.782720 | 91.856683  | 180.000000 | 39.217280  | 88.143317  | 1.5047  | 0.0743  | -0.2832 | 0.0114 | -0.7610 | 0.0076  | 0.5537           | 0.1188            |
| 8.000000 | 141.978655 | 190.429139 | 7.486735   | 64.660069  | 12.640797  | 3.3273  | 0.1226  | -0.3607 | 0.0159 | -0.9337 | 0.0110  | 2.1824           | -0.2108           |
| 8.000000 | 142.594799 | 243.533806 | 13.092486  | 119.636053 | 249.505282 | -0.9811 | 0.0816  | -0.2275 | 0.0098 | -0.8272 | 0.0089  | -1.9355          | 0.0864            |
| 8.000000 | 145.530485 | 282.935107 | 83.339774  | 63.603795  | 135.959468 | 1.4397  | 0.4054  | -0.3754 | 0.0615 | -1.3620 | 0.0370  | 0.2061           | 0.2599            |
| 8.000000 | 146.250508 | 125.944622 | 180.000000 | 33.749492  | 54.055378  | 2.7754  | 0.0324  | -0.3001 | 0.0050 | -0.6824 | 0.0037  | 1.8340           | -0.1293           |
| 8.000000 | 146.536840 | 77.733736  | 78.909427  | 97.551679  | 309.001475 | -1.0026 | 0.3125  | -0.3602 | 0.0800 | -1.2913 | 0.0332  | -2.2283          | -0.0507           |
| 8.000000 | 147.908229 | 143.986858 | 180.000000 | 32.091771  | 36.013142  | 3.3821  | 0.0461  | -0.3453 | 0.0060 | -0.7104 | 0.0045  | 2.3831           | -0.1657           |
| 8.000000 | 152.433504 | 286.723639 | 171.888307 | 51.963101  | 262.494366 | 1.0122  | 0.0880  | -0.2886 | 0.0123 | -0.7922 | 0.0081  | 0.0399           | 0.1454            |
| 8.000000 | 153.141163 | 340.302144 | 224.524214 | 122.940586 | 36.281971  | -3.0326 | 0.2460  | -0.3800 | 0.0475 | -1.3744 | 0.0261  | -4.4674          | 0.0351            |
| 8.000000 | 154.981718 | 260.870327 | 180.000000 | 25.018282  | 279.129673 | 2.8758  | 0.0794  | -0.3390 | 0.0122 | -0.6790 | 0.0069  | 1.9562           | 0.0452            |
| 8.000000 | 155.229456 | 313.357539 | 71.201428  | 68.011089  | 138.684696 | 1.3006  | 0.4591  | -0.4282 | 0.0783 | -1.4776 | 0.0434  | -0.0246          | 0.0398            |
| 8.000000 | 156.230851 | 270.537707 | 290.263971 | 94.742599  | 40.131139  | -0.5780 | 0.2791  | -0.3545 | 0.0569 | -1.1820 | 0.0283  | -1.7502          | -0.1355           |
| 8.000000 | 163.927057 | 175.625996 | 347.306616 | 86.726525  | 346.216854 | 1.1875  | 0.0931  | -0.3289 | 0.0121 | -0.9355 | 0.0092  | 0.0374           | -0.0458           |
| 8.000000 | 164.620920 | 99.786717  | 180.000000 | 15.379080  | 80.213283  | 3.3931  | 0.0457  | -0.3523 | 0.0075 | -0.6598 | 0.0044  | 2.4386           | 0.0114            |
| 8.000000 | 168.126948 | 194.808529 | 338.354937 | 96.918412  | 12.400308  | 0.1211  | 0.0931  | -0.3390 | 0.0120 | -0.9802 | 0.0096  | -1.0833          | 0.0019            |
| 8.000000 | 170.868928 | 15.952891  | 236.292875 | 28.881408  | 106.857519 | 2.4196  | 0.0458  | -0.3019 | 0.0072 | -0.6512 | 0.0042  | 1.5238           | 0.0770            |
| 8.100000 | 90.000000  | 90.000000  | 90.000000  | 90.000000  | 90.000000  | -0.2234 | 0.3152  | -0.2120 | 0.0704 | -1.2635 | 0.0330  | -1.2801          | -0.0249           |
| 8.100000 | 113.961106 | 43.865354  | 93.195234  | 145.897847 | 278.651839 | -0.0436 | 1.3624  | -0.5814 | 0.3471 | -1.8863 | 0.1349  | -0.6670          | -0.0631           |
| 8.142154 | 80.494270  | 85.340679  | 180.000000 | 99.505730  | 94.659321  | -1.4416 | 0.5710  | -0.2545 | 0.1314 | -1.4565 | 0.0533  | -2.3969          | 0.0163            |
| 8.148169 | 143.699250 | 281.814384 | 253.262217 | 117.058974 | 18.130570  | -2.3336 | 0.3770  | -0.3761 | 0.0598 | -1.1886 | 0.0332  | -3.4283          | 0.0218            |
| 8.200000 | 52.506283  | 34.763197  | 43.838943  | 111.622660 | 223.105736 | 0.6416  | 0.0735  | -0.0911 | 0.0088 | -0.6374 | 0.0076  | 0.0030           | 0.0648            |
| 8.200000 | 58.874102  | 93.313816  | 72.333095  | 84.548827  | 231.184541 | -0.4850 | 0.9746  | -0.3833 | 0.2114 | -1.7080 | 0.0874  | -1.3029          | -0.2673           |
| 8.200000 | 90.000000  | 0.000000   | 0.000000   | 90.000000  | 90.000000  | -0.0532 | 1.1253  | -0.5958 | 0.3231 | -2.1851 | 0.1214  | -1.2642          | 0.1539            |
| 8.200000 | 90.000000  | 0.000000   | 90.000000  | 90.000000  | 180.000000 | -4.0476 | 16.4740 | -8.3893 | 7.8979 | -7.5951 | 1.4531  | 5.7930           | 0.6736            |
| 8.200000 | 90.000000  | 0.000000   | 180.000000 | 90.000000  | 180.000000 | -2.5411 | 16.1566 | -7.1159 | 6.6153 | -7.0061 | 1.2536  | 7.3625           | 1.9243            |
| 8.200000 | 90.000000  | 90.000000  | 90.000000  | 90.000000  | 270.000000 | -0.9952 | 0.3440  | -0.2254 | 0.0905 | -1.2325 | 0.0369  | -1.9818          | 0.1150            |
| 8.200000 | 114.591558 | 316.419537 | 342.577555 | 96.130401  | 308.875443 | 1.4563  | 0.6801  | -0.3865 | 0.1493 | -1.7944 | 0.0672  | 0.1720           | -0.3179           |

continued on next page

| $R$      | $\beta_A$  | $\gamma_A$ | $\alpha_B$ | $\beta_B$  | $\gamma_B$ | elst    | exch    | ind      | ex-ind  | disp    | ex-disp | $E_{\text{int}}$ | $E_{\text{diff}}$ |
|----------|------------|------------|------------|------------|------------|---------|---------|----------|---------|---------|---------|------------------|-------------------|
| 8.200000 | 135.000000 | 45.000000  | 135.000000 | 135.000000 | 135.000000 | -0.6810 | 0.0130  | -0.0901  | 0.0020  | -0.5309 | 0.0018  | -1.2851          | 0.0290            |
| 8.300000 | 90.000000  | 0.000000   | 0.000000   | 90.000000  | 180.000000 | -4.1978 | 25.0708 | -11.3044 | 10.7129 | -8.8833 | 1.8150  | 13.2131          | 3.3935            |
| 8.300000 | 90.000000  | 0.000000   | 90.000000  | 90.000000  | 0.000000   | -1.4401 | 1.0867  | -0.5960  | 0.1813  | -2.1250 | 0.1010  | -2.7922          | -0.2590           |
| 8.300000 | 90.000000  | 0.000000   | 180.000000 | 90.000000  | 0.000000   | -1.8130 | 1.1002  | -0.5264  | 0.2100  | -2.1982 | 0.1077  | -3.1199          | -0.0493           |
| 8.300000 | 90.000000  | 90.000000  | 180.000000 | 90.000000  | 0.000000   | -2.0101 | 0.1357  | -0.1834  | 0.0176  | -0.9628 | 0.0126  | -2.9904          | 0.1784            |
| 8.400000 | 90.000000  | 0.000000   | 90.000000  | 90.000000  | 270.000000 | -0.5614 | 1.4469  | -0.6701  | 0.3538  | -2.0255 | 0.1359  | -1.3204          | 0.0768            |
| 8.400000 | 131.620340 | 315.122197 | 161.712968 | 67.978962  | 237.556912 | -1.9417 | 0.0483  | -0.1942  | 0.0064  | -0.7717 | 0.0054  | -2.8475          | -0.1678           |
| 8.500000 | 0.000000   | 0.000000   | 0.000000   | 180.000000 | 180.000000 | 0.9016  | 0.0002  | -0.0284  | 0.0000  | -0.1987 | 0.0000  | 0.6748           | 0.0535            |
| 8.500000 | 36.775148  | 224.002568 | 159.329115 | 123.163249 | 298.713698 | 0.7686  | 0.2716  | -0.1862  | 0.0563  | -0.9846 | 0.0293  | -0.0451          | 0.1770            |
| 8.500000 | 45.000000  | 45.000000  | 135.000000 | 135.000000 | 135.000000 | 0.6579  | 0.0007  | -0.0301  | 0.0001  | -0.2212 | 0.0001  | 0.4075           | 0.1112            |
| 8.500000 | 45.000000  | 135.000000 | 135.000000 | 45.000000  | 135.000000 | -1.2142 | 0.1291  | -0.1712  | 0.0232  | -0.8810 | 0.0139  | -2.1003          | -0.2276           |
| 8.500000 | 45.000000  | 135.000000 | 135.000000 | 135.000000 | 45.000000  | 0.8024  | 0.4498  | -0.2529  | 0.0980  | -1.0960 | 0.0462  | 0.0474           | 0.1925            |
| 8.500000 | 67.113051  | 108.432073 | 180.000000 | 112.886949 | 71.567927  | -0.7573 | 0.7486  | -0.3974  | 0.2593  | -1.6799 | 0.0842  | -1.7425          | 0.1062            |
| 8.500000 | 77.129563  | 239.696506 | 283.984960 | 64.964425  | 103.986804 | -0.7725 | 0.0480  | -0.1342  | 0.0083  | -0.7700 | 0.0059  | -1.6145          | -0.0131           |
| 8.500000 | 90.000000  | 0.000000   | 0.000000   | 90.000000  | 0.000000   | -0.5369 | 0.5333  | -0.3509  | 0.0855  | -1.5167 | 0.0522  | -1.7335          | -0.0981           |
| 8.500000 | 90.000000  | 0.000000   | 180.000000 | 90.000000  | 90.000000  | -0.8183 | 1.1540  | -0.5540  | 0.3302  | -1.9301 | 0.1216  | -1.6966          | 0.0800            |
| 8.500000 | 90.000000  | 90.000000  | 0.000000   | 90.000000  | 90.000000  | 1.7374  | 0.2344  | -0.1525  | 0.0466  | -0.9331 | 0.0230  | 0.9558           | -0.1592           |
| 8.500000 | 90.000000  | 90.000000  | 0.000000   | 90.000000  | 270.000000 | 1.3981  | 0.2038  | -0.1381  | 0.0386  | -0.8816 | 0.0202  | 0.6410           | -0.1428           |
| 8.500000 | 90.000000  | 180.000000 | 0.000000   | 90.000000  | 0.000000   | 2.4393  | 0.0366  | -0.1422  | 0.0041  | -0.7863 | 0.0038  | 1.5553           | -0.0794           |
| 8.500000 | 90.000000  | 180.000000 | 90.000000  | 90.000000  | 0.000000   | 0.3972  | 0.0317  | -0.1330  | 0.0038  | -0.7590 | 0.0035  | -0.4559          | 0.1132            |
| 8.500000 | 90.420384  | 358.489876 | 232.059589 | 19.761823  | 323.504456 | -2.5266 | 0.1894  | -0.3676  | 0.0319  | -1.0265 | 0.0216  | -3.6779          | -0.0603           |
| 8.500000 | 97.803762  | 215.755776 | 180.000000 | 82.196238  | 324.244224 | -1.3839 | 0.0142  | -0.1357  | 0.0029  | -0.6391 | 0.0022  | -2.1393          | 0.1234            |
| 8.500000 | 97.982017  | 306.372973 | 196.844368 | 62.907327  | 225.611445 | -1.9958 | 0.0603  | -0.1272  | 0.0074  | -0.8573 | 0.0068  | -2.9057          | 0.0816            |
| 8.500000 | 102.448819 | 271.417320 | 0.000000   | 102.448819 | 271.417320 | 1.2921  | 0.1172  | -0.1223  | 0.0225  | -0.8128 | 0.0129  | 0.5096           | -0.0508           |
| 8.500000 | 102.482834 | 20.165759  | 265.934958 | 36.607245  | 283.048193 | -1.1900 | 0.5102  | -0.4234  | 0.0844  | -1.2395 | 0.0475  | -2.2108          | 0.0716            |
| 8.500000 | 108.150624 | 202.758704 | 180.000000 | 71.849376  | 337.241296 | -0.4184 | 0.0114  | -0.1585  | 0.0018  | -0.5753 | 0.0016  | -1.1374          | 0.1475            |
| 8.500000 | 126.158624 | 333.191361 | 70.574116  | 46.179818  | 111.419903 | 1.9720  | 0.1050  | -0.1973  | 0.0176  | -0.8595 | 0.0117  | 1.0496           | 0.0772            |
| 8.500000 | 127.704139 | 256.782821 | 296.996640 | 85.290675  | 39.984254  | 0.3964  | 0.0103  | -0.1139  | 0.0025  | -0.5420 | 0.0017  | -0.2449          | 0.0367            |
| 8.500000 | 128.258397 | 173.880014 | 15.743097  | 57.686051  | 339.235302 | 2.8053  | 0.0252  | -0.2121  | 0.0030  | -0.5498 | 0.0025  | 2.0742           | 0.1170            |
| 8.500000 | 135.000000 | 135.000000 | 45.000000  | 135.000000 | 135.000000 | -1.1579 | 0.0020  | -0.0973  | 0.0002  | -0.3100 | 0.0003  | -1.5627          | -0.0815           |
| 8.500000 | 146.115961 | 279.807332 | 355.873567 | 121.386766 | 274.050749 | -0.8458 | 0.1583  | -0.2191  | 0.0236  | -0.7273 | 0.0153  | -1.5950          | 0.1174            |
| 8.500000 | 152.789306 | 129.100846 | 234.502474 | 87.260372  | 210.858624 | -1.3613 | 0.1448  | -0.2876  | 0.0188  | -0.8949 | 0.0155  | -2.3647          | -0.1379           |
| 8.500000 | 166.914647 | 120.656676 | 220.846324 | 87.429118  | 206.074782 | -1.9006 | 0.2853  | -0.3859  | 0.0420  | -0.9951 | 0.0275  | -2.9269          | -0.1823           |
| 8.500000 | 180.000000 | 0.000000   | 0.000000   | 0.000000   | 180.000000 | 3.5062  | 0.0074  | -0.2384  | 0.0012  | -0.3929 | 0.0008  | 2.8842           | -0.0366           |
| 8.900000 | 45.000000  | 45.000000  | 45.000000  | 45.000000  | 135.000000 | -0.5367 | 0.0006  | -0.0602  | 0.0001  | -0.2488 | 0.0001  | -0.8448          | 0.0794            |
| 8.900000 | 90.000000  | 0.000000   | 90.000000  | 90.000000  | 90.000000  | 0.1694  | 0.3422  | -0.2494  | 0.0661  | -1.0603 | 0.0374  | -0.6944          | 0.1088            |
| 8.900000 | 135.000000 | 45.000000  | 45.000000  | 135.000000 | 135.000000 | -0.3755 | 0.0008  | -0.0627  | 0.0001  | -0.2531 | 0.0002  | -0.6902          | 0.1290            |
| 8.900000 | 135.000000 | 45.000000  | 45.000000  | 135.000000 | 135.000000 | -0.3755 | 0.0008  | -0.0627  | 0.0001  | -0.2531 | 0.0002  | -0.6902          | 0.1290            |
| 8.900000 | 135.000000 | 135.000000 | 135.000000 | 135.000000 | 135.000000 | -1.0698 | 0.0003  | -0.0563  | 0.0001  | -0.2190 | 0.0001  | -1.3447          | 0.0048            |
| 8.900000 | 180.000000 | 0.000000   | 0.000000   | 0.000000   | 0.000000   | 2.5420  | 0.0019  | -0.1618  | 0.0004  | -0.2725 | 0.0002  | 2.1102           | -0.1085           |
| 9.000000 | 0.000000   | 0.000000   | 0.000000   | 90.000000  | 0.000000   | -0.1666 | 0.0001  | -0.0377  | 0.0001  | -0.2229 | 0.0001  | -0.4269          | 0.0214            |
| 9.000000 | 0.000000   | 0.000000   | 0.000000   | 90.000000  | 90.000000  | 0.1120  | 0.0004  | -0.0330  | 0.0001  | -0.2151 | 0.0001  | -0.1356          | 0.0745            |
| 9.000000 | 0.000000   | 0.000000   | 0.000000   | 180.000000 | 90.000000  | 0.7050  | 0.0000  | -0.0191  | 0.0000  | -0.1254 | 0.0000  | 0.5605           | 0.0102            |
| 9.000000 | 29.387152  | 39.370209  | 202.262819 | 75.098244  | 331.672406 | -0.5836 | 0.0001  | -0.0401  | 0.0000  | -0.1975 | 0.0000  | -0.8210          | -0.1347           |
| 9.000000 | 45.000000  | 45.000000  | 45.000000  | 45.000000  | 45.000000  | -0.9823 | 0.0002  | -0.0658  | 0.0000  | -0.2085 | 0.0001  | -1.2563          | 0.0368            |
| 9.000000 | 45.000000  | 135.000000 | 45.000000  | 135.000000 | 45.000000  | 1.1566  | 0.2046  | -0.1403  | 0.0377  | -0.7503 | 0.0209  | 0.5292           | -0.0299           |
| 9.000000 | 45.000000  | 135.000000 | 45.000000  | 135.000000 | 135.000000 | 0.8047  | 0.0057  | -0.0385  | 0.0007  | -0.3108 | 0.0008  | 0.4626           | 0.0691            |
| 9.000000 | 45.000000  | 135.000000 | 45.000000  | 135.000000 | 135.000000 | 0.8047  | 0.0057  | -0.0385  | 0.0007  | -0.3108 | 0.0008  | 0.4626           | 0.0691            |
| 9.000000 | 50.599977  | 196.174792 | 201.009517 | 22.666173  | 155.246366 | -1.8523 | 0.0032  | -0.1067  | 0.0005  | -0.3827 | 0.0005  | -2.3375          | -0.0845           |
| 9.000000 | 52.506283  | 34.763197  | 43.838943  | 111.622660 | 223.105736 | 0.5322  | 0.0042  | -0.0422  | 0.0005  | -0.2788 | 0.0006  | 0.2164           | 0.0634            |
| 9.000000 | 69.062722  | 261.502715 | 106.588399 | 96.914147  | 62.352267  | 0.1005  | 0.0539  | -0.0902  | 0.0109  | -0.6257 | 0.0072  | -0.5433          | -0.0190           |
| 9.000000 | 80.494270  | 85.340679  | 180.000000 | 99.505730  | 94.659321  | -0.8799 | 0.0316  | -0.0471  | 0.0041  | -0.5050 | 0.0037  | -1.3926          | 0.0371            |
| 9.000000 | 89.393632  | 234.380808 | 113.528542 | 131.109999 | 113.339357 | -0.1290 | 0.0022  | -0.0458  | 0.0005  | -0.3283 | 0.0005  | -0.5000          | 0.0316            |
| 9.000000 | 90.000000  | 90.000000  | 0.000000   | 0.000000   | 180.000000 | 0.4043  | 0.0037  | -0.1110  | 0.0006  | -0.3229 | 0.0005  | -0.0248          | 0.0500            |
| 9.000000 | 90.000000  | 180.000000 | 0.000000   | 0.000000   | 0.000000   | 0.1883  | 0.0021  | -0.1316  | 0.0004  | -0.3322 | 0.0003  | -0.2726          | 0.1979            |
| 9.000000 | 108.268956 | 227.990388 | 313.201516 | 43.058753  | 62.487613  | 1.0387  | 0.0004  | -0.0876  | 0.0002  | -0.2892 | 0.0002  | 0.6626           | 0.0535            |
| 9.000000 | 121.551323 | 222.058840 | 180.000000 | 58.448677  | 317.941160 | 0.3972  | 0.0002  | -0.0888  | 0.0002  | -0.2831 | 0.0002  | 0.0258           | 0.1690            |
| 9.000000 | 131.733633 | 123.437859 | 47.850900  | 74.725529  | 332.270502 | 1.1354  | 0.0006  | -0.0906  | 0.0002  | -0.3088 | 0.0002  | 0.7370           | 0.1974            |
| 9.000000 | 135.000000 | 45.000000  | 45.000000  | 45.000000  | 135.000000 | 1.7626  | 0.0089  | -0.1020  | 0.0017  | -0.4262 | 0.0013  | 1.2463           | -0.2392           |
| 9.000000 | 143.699250 | 281.814384 | 253.262217 | 117.058974 | 18.130570  | -1.5344 | 0.0200  | -0.1278  | 0.0025  | -0.4387 | 0.0022  | -2.0762          | 0.0092            |
| 9.000000 | 146.536840 | 77.733736  | 78.909427  | 97.551679  | 309.001475 | -0.6809 | 0.0105  | -0.1068  | 0.0024  | -0.4068 | 0.0015  | -1.1800          | -0.0308           |
| 9.000000 | 180.000000 | 0.000000   | 0.000000   | 0.000000   | 90.000000  | 2.6647  | 0.0010  | -0.1539  | 0.0003  | -0.2498 | 0.0002  | 2.2625           | -0.0961           |
| 9.200000 | 45.000000  | 135.000000 | 45.000000  | 45.000000  | 45.000000  | -0.9251 | 0.0057  | -0.1018  | 0.0008  | -0.3257 | 0.0008  | -1.3453          | -0.1024           |
| 9.200000 | 45.000000  | 135.000000 | 45.000000  | 45.000000  | 135.000000 | -0.2959 | 0.0096  | -0.0809  | 0.0014  | -0.3607 | 0.0012  | -0.7253          | -0.0517           |
| 9.200000 | 45.000000  | 135.000000 | 135.000000 | 45.000000  | 45.000000  | -1.3620 | 0.0050  | -0.0903  | 0.0008  | -0.3213 | 0.0008  | -1.7670          | -0.0940           |
| 9.200000 | 135.000000 | 45.000000  | 45.000000  | 45.000000  | 45.000000  | 1.4808  | 0.0009  | -0.0929  | 0.0002  | -0.2716 | 0.0002  | 1.1177           | -0.0935           |

continued on next page

| $R$       | $\beta_A$  | $\gamma_A$ | $\alpha_B$ | $\beta_B$  | $\gamma_B$ | elst    | exch    | ind     | ex-ind | disp    | ex-disp | $E_{\text{int}}$ | $E_{\text{diff}}$ |
|-----------|------------|------------|------------|------------|------------|---------|---------|---------|--------|---------|---------|------------------|-------------------|
| 9.200000  | 135.000000 | 45.000000  | 45.000000  | 135.000000 | 45.000000  | -0.2758 | 0.0110  | -0.0988 | 0.0015 | -0.3887 | 0.0015  | -0.7493          | 0.0079            |
| 9.200000  | 135.000000 | 45.000000  | 135.000000 | 45.000000  | 45.000000  | 0.2521  | 0.0009  | -0.0988 | 0.0002 | -0.2704 | 0.0002  | -0.1157          | -0.2157           |
| 9.400000  | 45.000000  | 135.000000 | 135.000000 | 135.000000 | 135.000000 | 0.4759  | 0.0009  | -0.0308 | 0.0001 | -0.1878 | 0.0002  | 0.2585           | 0.0253            |
| 9.500000  | 0.000000   | 0.000000   | 0.000000   | 0.000000   | 180.000000 | -1.0444 | -0.0001 | -0.0380 | 0.0000 | -0.1171 | 0.0000  | -1.1995          | -0.0244           |
| 9.500000  | 45.000000  | 135.000000 | 135.000000 | 135.000000 | 45.000000  | 0.5541  | 0.0180  | -0.0605 | 0.0021 | -0.3378 | 0.0023  | 0.1782           | 0.0062            |
| 9.500000  | 90.000000  | 0.000000   | 0.000000   | 90.000000  | 180.000000 | 1.9269  | 0.4556  | -0.2814 | 0.0965 | -1.1427 | 0.0500  | 1.1049           | 0.4140            |
| 9.500000  | 90.000000  | 0.000000   | 90.000000  | 90.000000  | 180.000000 | 1.2828  | 0.2907  | -0.2235 | 0.0649 | -0.9493 | 0.0362  | 0.5018           | 0.3804            |
| 9.500000  | 90.000000  | 90.000000  | 270.000000 | 90.000000  | 0.000000   | 0.2684  | 0.0015  | -0.0409 | 0.0003 | -0.2806 | 0.0003  | -0.0510          | 0.0752            |
| 9.500000  | 104.308972 | 234.148849 | 303.793958 | 55.899948  | 49.989063  | 0.5915  | -0.0002 | -0.0537 | 0.0001 | -0.2021 | 0.0000  | 0.3356           | 0.0602            |
| 9.500000  | 117.405477 | 127.653940 | 200.980538 | 44.030741  | 42.389158  | 0.5816  | -0.0001 | -0.0658 | 0.0001 | -0.1834 | 0.0000  | 0.3325           | 0.0853            |
| 9.500000  | 121.376328 | 143.341280 | 227.256700 | 114.792860 | 229.047950 | -0.6416 | 0.0000  | -0.0486 | 0.0000 | -0.1979 | 0.0000  | -0.8880          | -0.0065           |
| 9.500000  | 135.000000 | 135.000000 | 45.000000  | 45.000000  | 135.000000 | 1.4093  | 0.0002  | -0.0752 | 0.0001 | -0.2142 | 0.0001  | 1.1203           | -0.0950           |
| 9.611502  | 52.506283  | 34.763197  | 43.838943  | 111.622660 | 223.105736 | 0.4588  | 0.0004  | -0.0275 | 0.0000 | -0.1649 | 0.0001  | 0.2669           | 0.0445            |
| 9.700000  | 135.000000 | 135.000000 | 45.000000  | 45.000000  | 180.000000 | 1.8012  | -0.0001 | -0.0769 | 0.0000 | -0.1551 | 0.0000  | 1.5693           | 0.0267            |
| 9.800000  | 90.000000  | 0.000000   | 0.000000   | 90.000000  | 90.000000  | 0.4362  | 0.0083  | -0.0501 | 0.0013 | -0.3229 | 0.0012  | 0.0739           | 0.1477            |
| 9.800000  | 90.000000  | 90.000000  | 270.000000 | 90.000000  | 270.000000 | 0.4886  | 0.0007  | -0.0260 | 0.0001 | -0.2100 | 0.0002  | 0.2536           | 0.0033            |
| 9.800000  | 135.000000 | 135.000000 | 135.000000 | 135.000000 | 45.000000  | -1.1757 | 0.0003  | -0.0560 | 0.0001 | -0.1855 | 0.0001  | -1.4167          | -0.0468           |
| 10.000000 | 8.759236   | 130.662423 | 136.187337 | 65.629709  | 194.187098 | 0.2593  | 0.0003  | -0.0322 | 0.0000 | -0.1586 | 0.0001  | 0.0689           | 0.0184            |
| 10.000000 | 10.229764  | 230.533091 | 331.967705 | 33.512601  | 259.982441 | -0.7389 | -0.0001 | -0.0346 | 0.0000 | -0.0945 | 0.0000  | -0.8681          | -0.0327           |
| 10.000000 | 13.138499  | 290.372962 | 360.000000 | 13.138499  | 290.372962 | -0.9113 | 0.0000  | -0.0340 | 0.0000 | -0.0844 | 0.0000  | -1.0297          | -0.0533           |
| 10.000000 | 15.340644  | 195.040002 | 177.446206 | 62.270145  | 198.045933 | 0.1478  | 0.0007  | -0.0348 | 0.0001 | -0.1799 | 0.0001  | -0.0660          | -0.0617           |
| 10.000000 | 19.351586  | 80.453534  | 0.000000   | 19.351586  | 80.453534  | -0.8936 | 0.0000  | -0.0374 | 0.0000 | -0.0912 | 0.0000  | -1.0222          | -0.0512           |
| 10.000000 | 25.817151  | 128.499906 | 290.313904 | 119.235591 | 342.406001 | 0.4150  | -0.0001 | -0.0257 | 0.0000 | -0.1590 | 0.0000  | 0.2303           | 0.0034            |
| 10.000000 | 28.272226  | 180.103173 | 180.000000 | 151.727774 | 359.896827 | 0.5146  | 0.0000  | -0.0263 | 0.0000 | -0.1177 | 0.0000  | 0.3707           | 0.0006            |
| 10.000000 | 28.831759  | 22.225265  | 219.199012 | 79.930228  | 359.170590 | -0.3714 | -0.0001 | -0.0211 | 0.0000 | -0.0911 | 0.0000  | -0.4836          | -0.1019           |
| 10.000000 | 30.526642  | 175.582130 | 220.086395 | 139.428567 | 40.437647  | 0.4691  | 0.0001  | -0.0307 | 0.0000 | -0.1471 | 0.0001  | 0.2915           | -0.0188           |
| 10.000000 | 36.772391  | 201.030942 | 329.920118 | 50.924896  | 225.963118 | -0.0309 | 0.0001  | -0.0375 | 0.0000 | -0.1615 | 0.0000  | -0.2298          | -0.0278           |
| 10.000000 | 41.325815  | 206.338056 | 39.343148  | 37.030696  | 172.504206 | -0.0743 | 0.0001  | -0.0446 | 0.0000 | -0.1678 | 0.0001  | -0.2864          | -0.0442           |
| 10.000000 | 42.198447  | 135.539694 | 0.000000   | 42.198447  | 135.539694 | -0.1586 | 0.0002  | -0.0457 | 0.0001 | -0.1682 | 0.0001  | -0.3721          | -0.0258           |
| 10.000000 | 45.000000  | 135.000000 | 135.000000 | 45.000000  | 135.000000 | -0.6908 | 0.0007  | -0.0380 | 0.0001 | -0.1945 | 0.0001  | -0.9223          | -0.1209           |
| 10.000000 | 46.595194  | 179.202766 | 209.735805 | 34.133897  | 140.993854 | -1.1736 | 0.0000  | -0.0373 | 0.0000 | -0.1700 | 0.0000  | -1.3809          | -0.0899           |
| 10.000000 | 47.597820  | 235.361897 | 180.000000 | 132.402180 | 304.638103 | 0.3952  | 0.0029  | -0.0390 | 0.0004 | -0.2158 | 0.0005  | 0.1442           | 0.0726            |
| 10.000000 | 49.619865  | 340.664642 | 167.241210 | 59.278600  | 2.358635   | -0.7277 | -0.0001 | -0.0263 | 0.0000 | -0.1100 | 0.0000  | -0.8640          | -0.0448           |
| 10.000000 | 55.799462  | 203.496852 | 44.621917  | 158.537555 | 45.457470  | 0.5180  | -0.0001 | -0.0238 | 0.0000 | -0.1535 | 0.0000  | 0.3408           | -0.0166           |
| 10.000000 | 58.477774  | 210.976988 | 158.252435 | 106.378031 | 317.192516 | -0.4535 | 0.0101  | -0.0341 | 0.0014 | -0.2882 | 0.0013  | -0.7630          | -0.0620           |
| 10.000000 | 58.874102  | 93.313816  | 72.333095  | 84.548827  | 231.184541 | -0.0839 | 0.0018  | -0.0282 | 0.0002 | -0.2135 | 0.0003  | -0.3233          | 0.0965            |
| 10.000000 | 58.908192  | 79.201189  | 245.000600 | 84.185909  | 313.169607 | -0.2000 | -0.0001 | -0.0268 | 0.0001 | -0.1651 | 0.0001  | -0.3920          | 0.0097            |
| 10.000000 | 62.032323  | 239.447754 | 0.000000   | 62.032323  | 239.447754 | 0.5467  | 0.0007  | -0.0344 | 0.0001 | -0.2097 | 0.0002  | 0.3037           | -0.0001           |
| 10.000000 | 67.051550  | 175.698387 | 180.000000 | 112.948450 | 4.301613   | -0.7407 | 0.0002  | -0.0245 | 0.0001 | -0.2298 | 0.0001  | -0.9947          | -0.0568           |
| 10.000000 | 72.143319  | 163.140130 | 274.499519 | 146.573704 | 266.341096 | 0.1161  | 0.0000  | -0.0246 | 0.0000 | -0.1473 | 0.0000  | -0.0558          | -0.0010           |
| 10.000000 | 73.669434  | 81.738146  | 80.422703  | 77.965133  | 238.316997 | -0.4690 | 0.0002  | -0.0226 | 0.0001 | -0.1858 | 0.0001  | -0.6771          | 0.1120            |
| 10.000000 | 73.944359  | 227.668488 | 100.593656 | 127.091258 | 75.289126  | 0.3047  | 0.0056  | -0.0369 | 0.0008 | -0.2434 | 0.0008  | 0.0317           | 0.0838            |
| 10.000000 | 75.341589  | 76.995567  | 6.241542   | 51.058083  | 76.949383  | 0.2104  | 0.0000  | -0.0352 | 0.0000 | -0.1459 | 0.0000  | 0.0294           | 0.0369            |
| 10.000000 | 75.398437  | 99.961501  | 173.872611 | 128.907113 | 74.380164  | -0.0720 | 0.0042  | -0.0300 | 0.0007 | -0.2291 | 0.0007  | -0.3256          | 0.0826            |
| 10.000000 | 75.718661  | 209.120443 | 180.000000 | 104.281339 | 330.879557 | -0.9850 | 0.0022  | -0.0280 | 0.0004 | -0.2481 | 0.0004  | -1.2581          | 0.0027            |
| 10.000000 | 77.129563  | 239.696506 | 283.984960 | 64.964425  | 103.986804 | -0.4777 | -0.0001 | -0.0332 | 0.0001 | -0.1809 | 0.0001  | -0.6917          | -0.0071           |
| 10.000000 | 78.610883  | 183.966041 | 0.000000   | 78.610883  | 183.966041 | 0.8681  | 0.0055  | -0.0511 | 0.0007 | -0.3273 | 0.0008  | 0.4967           | -0.0903           |
| 10.000000 | 78.926032  | 173.472520 | 204.824926 | 96.725822  | 13.265282  | -1.0355 | 0.0001  | -0.0318 | 0.0001 | -0.2086 | 0.0001  | -1.2757          | 0.1003            |
| 10.000000 | 79.236471  | 158.472518 | 67.739575  | 4.404374   | 274.067687 | -0.4107 | 0.0001  | -0.0660 | 0.0000 | -0.1601 | 0.0000  | -0.6366          | 0.0464            |
| 10.000000 | 81.671183  | 162.444532 | 223.638285 | 166.525426 | 218.035092 | -0.1181 | -0.0001 | -0.0198 | 0.0000 | -0.0973 | 0.0000  | -0.2353          | -0.0614           |
| 10.000000 | 84.398751  | 230.415868 | 180.000000 | 95.601249  | 309.584132 | -1.0220 | -0.0004 | -0.0279 | 0.0001 | -0.2036 | 0.0001  | -1.2538          | 0.0151            |
| 10.000000 | 86.057601  | 67.728231  | 67.570054  | 117.055324 | 247.914532 | -0.0680 | 0.0000  | -0.0214 | 0.0000 | -0.1535 | 0.0000  | -0.2428          | 0.1069            |
| 10.000000 | 86.776936  | 214.570422 | 360.000000 | 86.776936  | 214.570422 | 0.6430  | 0.0027  | -0.0343 | 0.0005 | -0.2510 | 0.0004  | 0.3614           | -0.0508           |
| 10.000000 | 86.817589  | 354.490138 | 186.095085 | 21.227554  | 345.777194 | -1.4558 | 0.0016  | -0.0921 | 0.0002 | -0.2103 | 0.0003  | -1.7562          | -0.0559           |
| 10.000000 | 89.325788  | 185.561788 | 180.000000 | 90.674212  | 354.438212 | -0.9693 | -0.0001 | -0.0402 | 0.0000 | -0.1902 | 0.0000  | -1.1997          | 0.1004            |
| 10.000000 | 89.402523  | 148.066340 | 21.141098  | 102.825328 | 147.524657 | 0.2478  | 0.0005  | -0.0313 | 0.0001 | -0.1929 | 0.0001  | 0.0244           | -0.0080           |
| 10.000000 | 89.458834  | 196.830725 | 307.039843 | 29.819647  | 64.848338  | 0.3174  | 0.0000  | -0.0545 | 0.0000 | -0.1449 | 0.0000  | 0.1181           | 0.0965            |
| 10.000000 | 89.885999  | 97.908478  | 355.694844 | 65.339668  | 101.688668 | 0.9135  | -0.0001 | -0.0252 | 0.0000 | -0.1631 | 0.0000  | 0.7252           | -0.0272           |
| 10.000000 | 90.000000  | 0.000000   | 0.000000   | 0.000000   | 90.000000  | -1.3717 | 0.0013  | -0.0907 | 0.0002 | -0.2083 | 0.0002  | -1.6689          | -0.0322           |
| 10.000000 | 90.000000  | 0.000000   | 0.000000   | 0.000000   | 180.000000 | -1.1976 | 0.0016  | -0.0926 | 0.0002 | -0.2105 | 0.0003  | -1.4985          | -0.0430           |
| 10.000000 | 90.000000  | 0.000000   | 0.000000   | 90.000000  | 0.000000   | 0.0307  | 0.0032  | -0.0545 | 0.0004 | -0.2757 | 0.0005  | -0.2954          | -0.0777           |
| 10.000000 | 90.000000  | 0.000000   | 90.000000  | 90.000000  | 0.000000   | -0.4447 | 0.0035  | -0.0613 | 0.0004 | -0.2852 | 0.0005  | -0.7868          | -0.0944           |
| 10.000000 | 90.000000  | 0.000000   | 90.000000  | 90.000000  | 270.000000 | -0.1194 | 0.0063  | -0.0497 | 0.0009 | -0.2807 | 0.0010  | -0.4416          | 0.1612            |
| 10.000000 | 90.000000  | 0.000000   | 180.000000 | 90.000000  | 0.000000   | -0.8459 | 0.0036  | -0.0459 | 0.0004 | -0.2904 | 0.0006  | -1.1776          | -0.0334           |
| 10.000000 | 90.000000  | 0.000000   | 180.000000 | 90.000000  | 180.000000 | 0.9342  | 0.0564  | -0.1066 | 0.0094 | -0.4940 | 0.0072  | 0.4067           | 0.2618            |
| 10.000000 | 90.000000  | 90.000000  | 0.000000   | 0.000000   | 90.000000  | 0.0732  | 0.0001  | -0.0535 | 0.0000 | -0.1423 | 0.0000  | -0.1224          | -0.0580           |

continued on next page

| $R$       | $\beta_A$  | $\gamma_A$ | $\alpha_B$ | $\beta_B$  | $\gamma_B$ | elst    | exch    | ind     | ex-ind | disp    | ex-disp | $E_{\text{int}}$ | $E_{\text{diff}}$ |
|-----------|------------|------------|------------|------------|------------|---------|---------|---------|--------|---------|---------|------------------|-------------------|
| 10.000000 | 90.000000  | 90.000000  | 0.000000   | 0.000000   | 270.000000 | -0.1608 | 0.0001  | -0.0569 | 0.0000 | -0.1434 | 0.0000  | -0.3609          | -0.0116           |
| 10.000000 | 90.000000  | 90.000000  | 0.000000   | 90.000000  | 0.000000   | 0.9484  | 0.0000  | -0.0276 | 0.0001 | -0.1867 | 0.0001  | 0.7343           | 0.0823            |
| 10.000000 | 90.000000  | 90.000000  | 0.000000   | 90.000000  | 90.000000  | 0.9538  | 0.0011  | -0.0228 | 0.0002 | -0.1885 | 0.0002  | 0.7441           | 0.0257            |
| 10.000000 | 90.000000  | 90.000000  | 0.000000   | 90.000000  | 270.000000 | 0.7573  | 0.0010  | -0.0232 | 0.0002 | -0.1832 | 0.0002  | 0.5521           | 0.0613            |
| 10.000000 | 90.000000  | 90.000000  | 90.000000  | 90.000000  | 0.000000   | -0.2897 | 0.0001  | -0.0301 | 0.0001 | -0.1848 | 0.0001  | -0.5043          | 0.1614            |
| 10.000000 | 90.000000  | 90.000000  | 90.000000  | 90.000000  | 90.000000  | -0.0343 | 0.0004  | -0.0240 | 0.0001 | -0.1771 | 0.0001  | -0.2347          | 0.0498            |
| 10.000000 | 90.000000  | 90.000000  | 90.000000  | 90.000000  | 270.000000 | -0.4701 | 0.0007  | -0.0224 | 0.0001 | -0.1810 | 0.0001  | -0.6725          | 0.1123            |
| 10.000000 | 90.000000  | 90.000000  | 180.000000 | 90.000000  | 0.000000   | -0.9672 | 0.0002  | -0.0316 | 0.0001 | -0.1822 | 0.0001  | -1.1806          | 0.1079            |
| 10.000000 | 90.000000  | 90.000000  | 180.000000 | 90.000000  | 90.000000  | -0.8823 | -0.0001 | -0.0209 | 0.0001 | -0.1741 | 0.0001  | -1.0774          | 0.0798            |
| 10.000000 | 90.000000  | 90.000000  | 180.000000 | 90.000000  | 270.000000 | -0.7483 | -0.0002 | -0.0233 | 0.0001 | -0.1742 | 0.0001  | -0.9459          | 0.0276            |
| 10.000000 | 90.000000  | 180.000000 | 0.000000   | 0.000000   | 90.000000  | 0.5306  | 0.0000  | -0.0622 | 0.0000 | -0.1483 | 0.0000  | 0.3202           | 0.1395            |
| 10.000000 | 90.000000  | 180.000000 | 0.000000   | 0.000000   | 180.000000 | 0.9326  | 0.0000  | -0.0613 | 0.0000 | -0.1481 | 0.0000  | 0.7234           | 0.1424            |
| 10.000000 | 90.000000  | 180.000000 | 90.000000  | 90.000000  | 0.000000   | 0.1601  | -0.0001 | -0.0337 | 0.0000 | -0.1909 | 0.0000  | -0.0645          | 0.0281            |
| 10.000000 | 90.000000  | 180.000000 | 180.000000 | 90.000000  | 0.000000   | -0.9349 | -0.0001 | -0.0408 | 0.0000 | -0.1884 | 0.0000  | -1.1642          | 0.0988            |
| 10.000000 | 90.011145  | 279.241108 | 108.688327 | 73.781411  | 76.788648  | 0.1915  | -0.0001 | -0.0265 | 0.0000 | -0.1550 | 0.0000  | 0.0100           | -0.0046           |
| 10.000000 | 92.251661  | 149.257560 | 240.419439 | 136.992577 | 253.792141 | -0.2878 | 0.0000  | -0.0270 | 0.0000 | -0.1439 | 0.0000  | -0.4586          | -0.0384           |
| 10.000000 | 92.985634  | 87.174525  | 180.000000 | 87.014366  | 92.825475  | -0.8935 | -0.0002 | -0.0218 | 0.0000 | -0.1668 | 0.0000  | -1.0822          | 0.0827            |
| 10.000000 | 93.378903  | 151.441111 | 43.125534  | 29.521255  | 322.000701 | 0.4679  | 0.0000  | -0.0564 | 0.0000 | -0.1512 | 0.0000  | 0.2604           | 0.0234            |
| 10.000000 | 94.225864  | 143.871740 | 200.650284 | 71.173976  | 34.759276  | -0.6371 | -0.0001 | -0.0426 | 0.0000 | -0.1615 | 0.0000  | -0.8413          | -0.0042           |
| 10.000000 | 94.243532  | 197.078778 | 180.000000 | 85.756468  | 342.921222 | -0.8656 | 0.0000  | -0.0447 | 0.0000 | -0.1821 | 0.0000  | -1.0923          | 0.0397            |
| 10.000000 | 96.047951  | 127.191286 | 164.333198 | 103.390092 | 48.949985  | -0.9986 | -0.0003 | -0.0303 | 0.0001 | -0.1949 | 0.0001  | -1.2241          | 0.0088            |
| 10.000000 | 96.361439  | 47.367438  | 249.662092 | 40.242472  | 289.472366 | -0.0195 | 0.0000  | -0.0483 | 0.0000 | -0.1635 | 0.0000  | -0.2312          | -0.0471           |
| 10.000000 | 97.239603  | 59.157214  | 12.332528  | 75.554587  | 61.199728  | 0.7109  | -0.0001 | -0.0264 | 0.0000 | -0.1608 | 0.0000  | 0.5236           | -0.0479           |
| 10.000000 | 100.618891 | 192.324259 | 307.231123 | 37.398694  | 35.896834  | 0.8594  | -0.0001 | -0.0575 | 0.0000 | -0.1472 | 0.0000  | 0.6547           | 0.0729            |
| 10.000000 | 103.896370 | 224.194037 | 18.033172  | 86.577175  | 223.038057 | 0.3523  | 0.0001  | -0.0322 | 0.0001 | -0.1839 | 0.0001  | 0.1363           | -0.0228           |
| 10.000000 | 105.731346 | 25.708875  | 81.222183  | 147.868744 | 279.018714 | 0.3870  | 0.0046  | -0.0443 | 0.0006 | -0.2247 | 0.0007  | 0.1240           | 0.1104            |
| 10.000000 | 106.312061 | 331.986177 | 0.000000   | 106.312061 | 331.986177 | 1.1864  | 0.0224  | -0.0535 | 0.0033 | -0.3620 | 0.0026  | 0.7993           | -0.0958           |
| 10.000000 | 106.585047 | 129.097329 | 0.000000   | 106.585047 | 129.097329 | 0.1179  | -0.0001 | -0.0280 | 0.0000 | -0.1439 | 0.0000  | -0.0540          | 0.0401            |
| 10.000000 | 106.605328 | 191.755547 | 204.934749 | 79.232930  | 345.082209 | -0.2805 | -0.0002 | -0.0504 | 0.0000 | -0.1665 | 0.0000  | -0.4976          | -0.0271           |
| 10.000000 | 106.757192 | 106.653743 | 188.375978 | 49.422826  | 72.068800  | -0.2388 | -0.0001 | -0.0400 | 0.0000 | -0.1314 | 0.0000  | -0.4102          | -0.0005           |
| 10.000000 | 107.322383 | 203.512812 | 348.029195 | 30.341196  | 29.051462  | 1.1939  | -0.0001 | -0.0600 | 0.0000 | -0.1394 | 0.0000  | 0.9944           | 0.0685            |
| 10.000000 | 109.567576 | 72.358197  | 186.775462 | 94.421594  | 103.893255 | -0.8429 | 0.0000  | -0.0215 | 0.0000 | -0.1643 | 0.0000  | -1.0286          | 0.0826            |
| 10.000000 | 109.801615 | 260.749211 | 287.370499 | 94.702321  | 78.517872  | -0.2681 | -0.0001 | -0.0309 | 0.0000 | -0.1632 | 0.0000  | -0.4623          | 0.0566            |
| 10.000000 | 110.132117 | 147.451376 | 214.161856 | 134.873547 | 205.824004 | -0.4611 | -0.0001 | -0.0234 | 0.0000 | -0.1061 | 0.0000  | -0.5907          | -0.0631           |
| 10.000000 | 112.135120 | 244.054354 | 180.000000 | 67.864880  | 295.945646 | -0.3997 | -0.0002 | -0.0352 | 0.0000 | -0.1328 | 0.0000  | -0.5679          | 0.0021            |
| 10.000000 | 113.161528 | 139.502536 | 40.662497  | 52.023438  | 328.802332 | 1.0507  | -0.0002 | -0.0469 | 0.0000 | -0.1359 | 0.0000  | 0.8677           | 0.0633            |
| 10.000000 | 113.961106 | 43.865354  | 93.195234  | 145.897847 | 278.651839 | -0.0429 | 0.0021  | -0.0324 | 0.0002 | -0.1927 | 0.0003  | -0.2653          | 0.0616            |
| 10.000000 | 115.649763 | 25.399601  | 22.661431  | 102.792754 | 35.830257  | 1.0952  | 0.0162  | -0.0493 | 0.0026 | -0.3346 | 0.0021  | 0.7322           | -0.0502           |
| 10.000000 | 117.895123 | 164.601583 | 180.000000 | 62.104876  | 15.398417  | 0.4731  | -0.0002 | -0.0593 | 0.0000 | -0.1487 | 0.0000  | 0.2651           | -0.0368           |
| 10.000000 | 121.618720 | 298.804815 | 180.000000 | 58.381280  | 241.195185 | -0.8212 | -0.0001 | -0.0417 | 0.0000 | -0.1612 | 0.0000  | -1.0242          | -0.1662           |
| 10.000000 | 122.981360 | 131.105003 | 246.198688 | 102.300886 | 214.444470 | -0.4293 | 0.0000  | -0.0409 | 0.0000 | -0.1636 | 0.0001  | -0.6336          | 0.0558            |
| 10.000000 | 123.838213 | 9.928227   | 19.278781  | 22.478044  | 146.338111 | 0.9023  | 0.0004  | -0.0549 | 0.0001 | -0.1984 | 0.0001  | 0.6497           | -0.0323           |
| 10.000000 | 124.526964 | 275.311938 | 287.023112 | 87.355605  | 71.118278  | -0.2279 | -0.0002 | -0.0361 | 0.0000 | -0.1509 | 0.0000  | -0.4150          | -0.0193           |
| 10.000000 | 125.326979 | 225.524713 | 0.000000   | 125.326979 | 225.524713 | -0.5462 | -0.0001 | -0.0369 | 0.0000 | -0.1129 | 0.0000  | -0.6960          | 0.0355            |
| 10.000000 | 126.158624 | 333.191361 | 70.574116  | 46.179818  | 111.419903 | 1.1058  | 0.0005  | -0.0456 | 0.0001 | -0.1952 | 0.0001  | 0.8657           | -0.1134           |
| 10.000000 | 128.258397 | 173.880014 | 15.743097  | 57.686051  | 339.235302 | 1.6761  | -0.0001 | -0.0658 | 0.0000 | -0.1448 | 0.0000  | 1.4655           | 0.0557            |
| 10.000000 | 128.795357 | 196.485691 | 333.425530 | 61.117916  | 29.322339  | 1.4468  | -0.0002 | -0.0576 | 0.0000 | -0.1401 | 0.0000  | 1.2489           | 0.0615            |
| 10.000000 | 129.735107 | 117.079518 | 21.837652  | 150.650532 | 131.384587 | -0.6283 | 0.0000  | -0.0289 | 0.0000 | -0.0876 | 0.0000  | -0.7448          | -0.0226           |
| 10.000000 | 131.620340 | 315.122197 | 161.712968 | 67.978962  | 237.556912 | -1.0298 | 0.0000  | -0.0445 | 0.0001 | -0.1769 | 0.0000  | -1.2510          | -0.1293           |
| 10.000000 | 131.738216 | 302.650014 | 346.602709 | 109.587100 | 292.830091 | 0.4693  | 0.0005  | -0.0372 | 0.0001 | -0.1945 | 0.0001  | 0.2383           | 0.0197            |
| 10.000000 | 132.324408 | 279.042881 | 102.672835 | 77.165043  | 138.526806 | 0.2493  | 0.0003  | -0.0447 | 0.0001 | -0.1897 | 0.0001  | 0.0154           | -0.0701           |
| 10.000000 | 135.960248 | 96.618787  | 0.000000   | 135.960248 | 96.618787  | -0.5396 | 0.0000  | -0.0426 | 0.0000 | -0.1274 | 0.0000  | -0.7095          | 0.0205            |
| 10.000000 | 136.730333 | 157.504458 | 42.076602  | 69.050113  | 349.300548 | 1.3269  | -0.0001 | -0.0613 | 0.0000 | -0.1457 | 0.0000  | 1.1198           | 0.0448            |
| 10.000000 | 137.142558 | 9.931965   | 211.344544 | 52.513934  | 145.767418 | -1.3129 | -0.0001 | -0.0614 | 0.0001 | -0.1940 | 0.0001  | -1.5682          | -0.0922           |
| 10.000000 | 138.654749 | 141.326083 | 23.289026  | 63.910230  | 327.134810 | 1.3147  | -0.0001 | -0.0552 | 0.0000 | -0.1319 | 0.0000  | 1.1275           | 0.0929            |
| 10.000000 | 138.728453 | 292.815974 | 258.840567 | 123.446494 | 50.681724  | -1.1124 | 0.0007  | -0.0466 | 0.0002 | -0.1881 | 0.0002  | -1.3461          | -0.0495           |
| 10.000000 | 139.729546 | 166.312792 | 212.939416 | 112.149344 | 183.738345 | -1.2057 | 0.0004  | -0.0555 | 0.0001 | -0.1578 | 0.0001  | -1.4184          | 0.0038            |
| 10.000000 | 139.954896 | 144.949963 | 199.241846 | 115.735515 | 209.893143 | -0.9167 | 0.0000  | -0.0418 | 0.0000 | -0.1306 | 0.0000  | -1.0890          | 0.0281            |
| 10.000000 | 140.113063 | 188.492543 | 213.911792 | 48.490442  | 329.610575 | 1.4461  | -0.0001 | -0.0713 | 0.0000 | -0.1322 | 0.0000  | 1.2426           | 0.1003            |
| 10.000000 | 140.404917 | 36.225371  | 23.241143  | 122.349055 | 54.733727  | 0.1503  | 0.0007  | -0.0485 | 0.0001 | -0.1980 | 0.0002  | -0.0952          | -0.0045           |
| 10.000000 | 140.782720 | 91.856683  | 180.000000 | 39.217280  | 88.143317  | 0.6745  | -0.0001 | -0.0561 | 0.0000 | -0.1264 | 0.0000  | 0.4919           | -0.1151           |
| 10.000000 | 141.978655 | 190.429139 | 7.486735   | 64.660069  | 12.640797  | 1.6302  | 0.0000  | -0.0691 | 0.0000 | -0.1433 | 0.0000  | 1.4178           | 0.0707            |
| 10.000000 | 142.228286 | 304.378736 | 264.223668 | 110.177152 | 55.960946  | -0.9825 | 0.0004  | -0.0486 | 0.0001 | -0.1889 | 0.0001  | -1.2193          | -0.0239           |
| 10.000000 | 142.594799 | 243.533806 | 13.092486  | 119.636053 | 249.505282 | -0.4783 | 0.0000  | -0.0467 | 0.0000 | -0.1315 | 0.0000  | -0.6565          | 0.0424            |
| 10.000000 | 145.530485 | 282.935107 | 83.339774  | 63.603795  | 135.959468 | 0.7852  | 0.0003  | -0.0496 | 0.0001 | -0.1755 | 0.0001  | 0.5606           | -0.1628           |
| 10.000000 | 146.250508 | 125.944622 | 180.000000 | 33.749492  | 54.055378  | 1.4165  | 0.0000  | -0.0666 | 0.0000 | -0.1211 | 0.0000  | 1.2287           | 0.0472            |

continued on next page

| $R$       | $\beta_A$  | $\gamma_A$ | $\alpha_B$ | $\beta_B$  | $\gamma_B$ | elst    | exch    | ind     | ex-ind | disp    | ex-disp | $E_{\text{int}}$ | $E_{\text{diff}}$ |
|-----------|------------|------------|------------|------------|------------|---------|---------|---------|--------|---------|---------|------------------|-------------------|
| 10.000000 | 147.908229 | 143.986858 | 180.000000 | 32.091771  | 36.013142  | 1.7126  | 0.0000  | -0.0752 | 0.0000 | -0.1234 | 0.0000  | 1.5141           | 0.1004            |
| 10.000000 | 152.433504 | 286.723639 | 171.888307 | 51.963101  | 262.494366 | 0.3746  | 0.0000  | -0.0550 | 0.0000 | -0.1309 | 0.0000  | 0.1886           | -0.1930           |
| 10.000000 | 152.789306 | 129.100846 | 234.502474 | 87.260372  | 210.858624 | -0.7348 | 0.0008  | -0.0758 | 0.0001 | -0.1942 | 0.0002  | -1.0038          | -0.0261           |
| 10.000000 | 153.141163 | 340.302144 | 224.524214 | 122.940586 | 36.281971  | -1.2583 | 0.0001  | -0.0504 | 0.0001 | -0.1823 | 0.0001  | -1.4907          | -0.1096           |
| 10.000000 | 155.229456 | 313.357539 | 71.201428  | 68.011089  | 138.684696 | 0.6982  | 0.0005  | -0.0530 | 0.0001 | -0.1849 | 0.0001  | 0.4610           | -0.1418           |
| 10.000000 | 156.230851 | 270.537707 | 290.263971 | 94.742599  | 40.131139  | -0.2496 | 0.0002  | -0.0534 | 0.0001 | -0.1601 | 0.0001  | -0.4627          | -0.0115           |
| 10.000000 | 161.968501 | 69.385966  | 11.865985  | 137.683973 | 82.721725  | -0.8208 | 0.0001  | -0.0539 | 0.0001 | -0.1321 | 0.0001  | -1.0066          | -0.0137           |
| 10.000000 | 163.927057 | 175.625996 | 347.306616 | 86.726525  | 346.216854 | 0.5682  | 0.0000  | -0.0643 | 0.0000 | -0.1490 | 0.0000  | 0.3550           | 0.0758            |
| 10.000000 | 164.620920 | 99.786717  | 180.000000 | 15.379080  | 80.213283  | 1.6437  | 0.0000  | -0.0744 | 0.0000 | -0.1194 | 0.0000  | 1.4500           | -0.0632           |
| 10.000000 | 165.482956 | 237.073917 | 108.107856 | 81.824443  | 183.234791 | -1.0814 | 0.0022  | -0.0949 | 0.0003 | -0.2243 | 0.0003  | -1.3978          | -0.0404           |
| 10.000000 | 168.126948 | 194.808529 | 338.354937 | 96.918412  | 12.400308  | 0.0337  | 0.0000  | -0.0660 | 0.0000 | -0.1554 | 0.0000  | -0.1876          | 0.0803            |
| 10.000000 | 170.868928 | 15.952891  | 236.292875 | 28.881408  | 106.857519 | 1.0928  | 0.0000  | -0.0641 | 0.0000 | -0.1229 | 0.0000  | 0.9059           | -0.1950           |
| 10.100000 | 90.000000  | 0.000000   | 180.000000 | 90.000000  | 90.000000  | -0.3251 | 0.0059  | -0.0381 | 0.0008 | -0.2669 | 0.0009  | -0.6224          | 0.1220            |
| 10.100000 | 180.000000 | 0.000000   | 0.000000   | 0.000000   | 0.000000   | 1.6786  | 0.0000  | -0.0693 | 0.0000 | -0.1089 | 0.0000  | 1.5003           | -0.0779           |
| 10.131859 | 108.150624 | 202.758704 | 180.000000 | 71.849376  | 337.241296 | -0.2074 | -0.0002 | -0.0453 | 0.0000 | -0.1401 | 0.0000  | -0.3930          | -0.0418           |
| 10.300000 | 135.000000 | 45.000000  | 135.000000 | 135.000000 | 45.000000  | -0.7963 | 0.0003  | -0.0276 | 0.0001 | -0.1539 | 0.0001  | -0.9773          | -0.0456           |
| 10.300000 | 135.000000 | 45.000000  | 135.000000 | 135.000000 | 45.000000  | -0.7963 | 0.0003  | -0.0276 | 0.0001 | -0.1539 | 0.0001  | -0.9773          | -0.0456           |
| 10.400000 | 90.000000  | 0.000000   | 90.000000  | 90.000000  | 90.000000  | 0.1530  | 0.0016  | -0.0379 | 0.0003 | -0.1968 | 0.0003  | -0.0795          | 0.0772            |
| 10.486107 | 27.975184  | 222.940928 | 156.291557 | 131.529174 | 295.198928 | 0.3850  | 0.0000  | -0.0212 | 0.0000 | -0.1008 | 0.0000  | 0.2630           | 0.0424            |
| 10.486166 | 71.019778  | 185.771849 | 298.861236 | 167.061553 | 284.654555 | 0.1109  | 0.0000  | -0.0166 | 0.0000 | -0.0855 | 0.0000  | 0.0088           | -0.0036           |
| 10.500000 | 36.775148  | 224.002568 | 159.329115 | 123.163249 | 298.713698 | 0.2861  | 0.0002  | -0.0249 | 0.0001 | -0.1304 | 0.0001  | 0.1311           | 0.0511            |
| 10.500000 | 45.000000  | 135.000000 | 45.000000  | 135.000000 | 45.000000  | 0.6753  | 0.0007  | -0.0253 | 0.0001 | -0.1504 | 0.0002  | 0.5006           | 0.0000            |
| 10.500000 | 90.000000  | 180.000000 | 0.000000   | 90.000000  | 0.000000   | 1.0679  | -0.0001 | -0.0240 | 0.0000 | -0.1330 | 0.0000  | 0.9108           | -0.0706           |
| 10.500000 | 114.591558 | 316.419537 | 342.577555 | 96.130401  | 308.875443 | 0.7771  | 0.0001  | -0.0218 | 0.0000 | -0.1524 | 0.0001  | 0.6031           | -0.0418           |
| 10.500000 | 146.115961 | 279.807332 | 355.873567 | 121.386766 | 274.050749 | -0.2837 | 0.0000  | -0.0355 | 0.0000 | -0.1074 | 0.0000  | -0.4263          | 0.0231            |
| 10.500000 | 180.000000 | 0.000000   | 0.000000   | 0.000000   | 180.000000 | 1.7795  | 0.0000  | -0.0572 | 0.0000 | -0.0839 | 0.0000  | 1.6384           | -0.0651           |
| 10.525807 | 89.393632  | 234.380808 | 113.528542 | 131.109999 | 113.339357 | -0.0445 | -0.0001 | -0.0074 | 0.0000 | 0.0000  | 0.0000  | -0.0520          | 0.0913            |
| 10.638764 | 146.536840 | 77.733736  | 78.909427  | 97.551679  | 309.001475 | -0.3980 | -0.0001 | -0.0306 | 0.0000 | -0.1019 | 0.0000  | -0.5305          | -0.0132           |
| 10.709000 | 102.448819 | 271.417320 | 0.000000   | 102.448819 | 271.417320 | 0.6044  | -0.0001 | -0.0141 | 0.0000 | -0.1032 | 0.0000  | 0.4871           | 0.0413            |
| 10.775248 | 107.829056 | 68.641296  | 347.654382 | 130.334680 | 59.670429  | 0.2840  | -0.0001 | -0.0170 | 0.0000 | -0.1011 | 0.0000  | 0.1658           | -0.0195           |
| 10.825876 | 13.740451  | 22.493003  | 5.019652   | 91.284163  | 198.573686 | 0.3695  | 0.0000  | -0.0135 | 0.0000 | -0.0634 | 0.0000  | 0.2926           | 0.0514            |
| 11.000000 | 67.113051  | 108.432073 | 180.000000 | 112.886949 | 71.567927  | -0.2377 | -0.0002 | -0.0125 | 0.0000 | -0.1074 | 0.0000  | -0.3577          | 0.0517            |
| 11.000000 | 90.000000  | 0.000000   | 0.000000   | 90.000000  | 180.000000 | 1.0236  | 0.0024  | -0.0406 | 0.0004 | -0.1930 | 0.0005  | 0.7934           | 0.1816            |
| 11.000000 | 90.000000  | 0.000000   | 90.000000  | 90.000000  | 180.000000 | 0.7131  | 0.0018  | -0.0403 | 0.0003 | -0.1755 | 0.0004  | 0.4997           | 0.2033            |
| 11.000000 | 102.482834 | 20.165759  | 265.934958 | 36.607245  | 283.048193 | -0.2553 | 0.0000  | -0.0358 | 0.0000 | -0.0992 | 0.0000  | -0.3902          | -0.0126           |
| 11.000000 | 121.551323 | 222.058840 | 180.000000 | 58.448677  | 317.941160 | 0.2392  | -0.0001 | -0.0246 | 0.0000 | -0.0657 | 0.0000  | 0.1488           | -0.0193           |
| 11.500000 | 90.000000  | 0.000000   | 180.000000 | 90.000000  | 180.000000 | 0.4178  | 0.0001  | -0.0276 | 0.0001 | -0.1141 | 0.0001  | 0.2764           | 0.1503            |
| 11.500000 | 97.803762  | 215.755776 | 180.000000 | 82.196238  | 324.244224 | -0.4954 | -0.0001 | -0.0147 | 0.0000 | -0.0584 | 0.0000  | -0.5685          | -0.0330           |
| 11.574000 | 126.038981 | 172.174468 | 0.000000   | 126.038981 | 172.174468 | -0.5890 | 0.0000  | -0.0176 | 0.0000 | -0.0411 | 0.0000  | -0.6477          | 0.0058            |
| 11.675960 | 132.061289 | 234.862930 | 151.961951 | 29.814450  | 324.573156 | 0.7919  | 0.0000  | -0.0228 | 0.0000 | -0.0415 | 0.0000  | 0.7275           | 0.0081            |
| 11.682817 | 124.518216 | 329.304131 | 180.000000 | 55.481784  | 210.695869 | -0.7974 | 0.0000  | -0.0146 | 0.0000 | -0.0659 | 0.0000  | -0.8779          | 0.0239            |
| 12.000000 | 12.517717  | 277.527859 | 83.116866  | 104.229433 | 355.373530 | 0.0299  | 0.0000  | -0.0075 | 0.0000 | -0.0322 | 0.0000  | -0.0098          | -0.0200           |
| 12.000000 | 64.722651  | 195.480678 | 335.216978 | 73.938956  | 207.212912 | 0.5888  | 0.0000  | -0.0095 | 0.0000 | -0.0644 | 0.0000  | 0.5148           | -0.0591           |
| 12.000000 | 69.062722  | 261.502715 | 106.588399 | 96.914147  | 62.352267  | 0.0919  | -0.0001 | -0.0077 | 0.0000 | -0.0479 | 0.0000  | 0.0363           | 0.0022            |
| 12.000000 | 127.704139 | 256.782821 | 296.996640 | 85.290675  | 39.984254  | 0.1075  | 0.0000  | -0.0109 | 0.0000 | -0.0393 | 0.0000  | 0.0573           | -0.0049           |
| 12.000000 | 166.914647 | 120.656676 | 220.846324 | 87.429118  | 206.074782 | -0.4331 | 0.0000  | -0.0226 | 0.0000 | -0.0472 | 0.0000  | -0.5029          | -0.0038           |
| 12.224779 | 116.552800 | 217.980474 | 180.000000 | 63.447200  | 322.019526 | 0.0591  | 0.0000  | -0.0122 | 0.0000 | -0.0329 | 0.0000  | 0.0140           | -0.0445           |
| 12.500000 | 75.341589  | 76.995567  | 6.241542   | 51.058083  | 76.949383  | 0.1088  | 0.0000  | -0.0079 | 0.0000 | -0.0292 | 0.0000  | 0.0717           | 0.0132            |
| 12.500000 | 94.225864  | 143.871740 | 200.650284 | 71.173976  | 34.759276  | -0.2854 | 0.0000  | -0.0090 | 0.0000 | -0.0316 | 0.0000  | -0.3260          | -0.0331           |
| 12.644555 | 116.597197 | 3.593228   | 25.134074  | 9.516061   | 164.299903 | 0.1212  | 0.0000  | -0.0121 | 0.0000 | -0.0329 | 0.0000  | 0.0761           | -0.0079           |
| 12.805867 | 50.139489  | 74.454496  | 81.544755  | 80.716250  | 213.669434 | 0.0446  | 0.0000  | -0.0060 | 0.0000 | -0.0294 | 0.0000  | 0.0091           | 0.0052            |
| 12.956134 | 79.976656  | 303.441692 | 119.073580 | 44.937169  | 79.144606  | -0.1117 | 0.0000  | -0.0073 | 0.0000 | -0.0229 | 0.0000  | -0.1419          | 0.0038            |
| 12.956134 | 100.504264 | 306.337058 | 99.422604  | 69.419461  | 79.353920  | 0.1972  | 0.0000  | -0.0049 | 0.0000 | -0.0254 | 0.0000  | 0.1668           | -0.0060           |
| 13.000000 | 89.380319  | 175.978231 | 60.071442  | 24.252449  | 314.817752 | 0.1454  | 0.0000  | -0.0108 | 0.0000 | -0.0236 | 0.0000  | 0.1110           | -0.0151           |
| 13.000000 | 93.378903  | 151.441111 | 43.125534  | 29.521255  | 322.000701 | 0.2144  | 0.0000  | -0.0098 | 0.0000 | -0.0230 | 0.0000  | 0.1816           | -0.0211           |
| 13.000000 | 117.405477 | 127.653940 | 200.980538 | 44.030741  | 42.389158  | 0.2377  | 0.0000  | -0.0089 | 0.0000 | -0.0207 | 0.0000  | 0.2080           | -0.0219           |
| 13.000000 | 131.738216 | 302.650014 | 346.602709 | 109.587100 | 292.830091 | 0.2206  | 0.0000  | -0.0054 | 0.0000 | -0.0258 | 0.0000  | 0.1894           | -0.0182           |
| 13.000000 | 138.654749 | 141.326083 | 23.289026  | 63.910230  | 327.134810 | 0.5822  | 0.0000  | -0.0100 | 0.0000 | -0.0213 | 0.0000  | 0.5509           | -0.0129           |
| 13.000000 | 158.447076 | 239.831670 | 198.299472 | 44.610973  | 287.318566 | 0.5169  | 0.0000  | -0.0113 | 0.0000 | -0.0201 | 0.0000  | 0.4854           | 0.0036            |
| 13.182000 | 38.798573  | 197.354376 | 0.000000   | 38.798573  | 197.354376 | 0.0378  | 0.0000  | -0.0062 | 0.0000 | -0.0220 | 0.0000  | 0.0096           | -0.0060           |
| 13.497089 | 31.766957  | 40.754324  | 52.752985  | 23.076839  | 355.951514 | -0.4553 | 0.0000  | -0.0058 | 0.0000 | -0.0126 | 0.0000  | -0.4737          | -0.0008           |
| 13.497089 | 84.891799  | 9.310996   | 24.768780  | 80.861563  | 9.024272   | -0.0543 | 0.0000  | -0.0060 | 0.0000 | -0.0224 | 0.0000  | -0.0828          | -0.0090           |
| 13.500000 | 58.908192  | 79.201189  | 245.000600 | 84.185909  | 313.169607 | -0.0581 | 0.0000  | -0.0036 | 0.0000 | -0.0181 | 0.0000  | -0.0798          | -0.0126           |
| 13.500000 | 128.258397 | 173.880014 | 15.743097  | 57.686051  | 339.235302 | 0.6431  | 0.0000  | -0.0088 | 0.0000 | -0.0174 | 0.0000  | 0.6169           | -0.0282           |
| 13.538052 | 131.264269 | 32.984948  | 180.000000 | 48.735731  | 147.015052 | -0.4014 | 0.0000  | -0.0058 | 0.0000 | -0.0203 | 0.0000  | -0.4275          | 0.0077            |
| 13.896366 | 89.410771  | 204.800914 | 203.114993 | 100.160560 | 340.236216 | -0.3155 | 0.0000  | -0.0030 | 0.0000 | -0.0176 | 0.0000  | -0.3361          | 0.0028            |

continued on next page

| $R$       | $\beta_A$  | $\gamma_A$ | $\alpha_B$ | $\beta_B$  | $\gamma_B$ | elst     | exch    | ind      | ex-ind  | disp     | ex-disp | $E_{\text{int}}$ | $E_{\text{diff}}$ |
|-----------|------------|------------|------------|------------|------------|----------|---------|----------|---------|----------|---------|------------------|-------------------|
| 14.000000 | 58.477774  | 210.976988 | 158.252435 | 106.378031 | 317.192516 | -0.1962  | 0.0000  | -0.0023  | 0.0000  | -0.0175  | 0.0000  | -0.2159          | -0.0005           |
| 14.000000 | 72.143319  | 163.140130 | 274.499519 | 146.573704 | 266.341096 | 0.0835   | 0.0000  | -0.0030  | 0.0000  | -0.0135  | 0.0000  | 0.0670           | -0.0124           |
| 14.000000 | 78.926032  | 173.472520 | 204.824926 | 96.725822  | 13.265282  | -0.3085  | 0.0000  | -0.0026  | 0.0000  | -0.0173  | 0.0000  | -0.3284          | 0.0065            |
| 14.000000 | 84.398751  | 230.415868 | 180.000000 | 95.601249  | 309.584132 | -0.3195  | 0.0000  | -0.0023  | 0.0000  | -0.0157  | 0.0000  | -0.3375          | -0.0048           |
| 14.000000 | 89.325788  | 185.561788 | 180.000000 | 90.674212  | 354.438212 | -0.2978  | 0.0000  | -0.0035  | 0.0000  | -0.0166  | 0.0000  | -0.3179          | 0.0040            |
| 14.000000 | 92.251661  | 149.257560 | 240.419439 | 136.992577 | 253.792141 | -0.0849  | 0.0000  | -0.0031  | 0.0000  | -0.0133  | 0.0000  | -0.1013          | -0.0126           |
| 14.000000 | 96.361439  | 47.367438  | 249.662092 | 40.242472  | 289.472366 | -0.0038  | 0.0000  | -0.0051  | 0.0000  | -0.0146  | 0.0000  | -0.0235          | 0.0070            |
| 14.000000 | 102.482834 | 20.165759  | 265.934958 | 36.607245  | 283.048193 | -0.0690  | 0.0000  | -0.0062  | 0.0000  | -0.0162  | 0.0000  | -0.0914          | -0.0018           |
| 14.000000 | 102.610612 | 170.759343 | 29.236727  | 34.869778  | 322.111966 | 0.3690   | 0.0000  | -0.0065  | 0.0000  | -0.0139  | 0.0000  | 0.3487           | -0.0177           |
| 14.000000 | 113.161528 | 139.502536 | 40.662497  | 52.023438  | 328.802332 | 0.3757   | 0.0000  | -0.0053  | 0.0000  | -0.0133  | 0.0000  | 0.3571           | -0.0142           |
| 14.000000 | 114.591558 | 316.419537 | 342.577555 | 96.130401  | 308.875443 | 0.3013   | 0.0000  | -0.0025  | 0.0000  | -0.0168  | 0.0000  | 0.2820           | -0.0120           |
| 14.000000 | 115.649763 | 25.399601  | 22.661431  | 102.792754 | 35.830257  | 0.3128   | 0.0000  | -0.0027  | 0.0000  | -0.0188  | 0.0000  | 0.2913           | -0.0134           |
| 14.000000 | 121.460791 | 38.788038  | 97.083126  | 125.186432 | 282.566453 | -0.1903  | 0.0000  | -0.0028  | 0.0000  | -0.0163  | 0.0000  | -0.2094          | -0.0010           |
| 14.000000 | 136.730333 | 157.504458 | 42.076602  | 69.050113  | 349.300548 | 0.4522   | 0.0000  | -0.0066  | 0.0000  | -0.0138  | 0.0000  | 0.4318           | -0.0234           |
| 14.000000 | 141.978655 | 190.429139 | 7.486735   | 64.660069  | 12.640797  | 0.5519   | 0.0000  | -0.0073  | 0.0000  | -0.0136  | 0.0000  | 0.5310           | -0.0218           |
| 14.000000 | 142.228286 | 304.378736 | 264.223668 | 110.177152 | 55.960946  | -0.2930  | 0.0000  | -0.0040  | 0.0000  | -0.0151  | 0.0000  | -0.3122          | -0.0110           |
| 14.000000 | 146.115961 | 279.807332 | 355.873567 | 121.386766 | 274.050749 | -0.0751  | 0.0000  | -0.0048  | 0.0000  | -0.0135  | 0.0000  | -0.0935          | -0.0116           |
| 14.000000 | 146.250508 | 125.944622 | 180.000000 | 33.749492  | 54.055378  | 0.4942   | 0.0000  | -0.0076  | 0.0000  | -0.0124  | 0.0000  | 0.4743           | -0.0031           |
| 14.000000 | 152.433504 | 286.723639 | 171.888307 | 51.963101  | 262.494366 | 0.0925   | 0.0000  | -0.0058  | 0.0000  | -0.0130  | 0.0000  | 0.0737           | 0.0090            |
| 14.000000 | 153.723462 | 180.772286 | 6.778495   | 81.830053  | 349.026330 | 0.3232   | 0.0000  | -0.0070  | 0.0000  | -0.0141  | 0.0000  | 0.3021           | -0.0178           |
| 14.000000 | 156.230851 | 270.537707 | 290.263971 | 94.742599  | 40.131139  | -0.0712  | 0.0000  | -0.0054  | 0.0000  | -0.0141  | 0.0000  | -0.0907          | -0.0119           |
| 14.000000 | 161.968501 | 69.385966  | 11.865985  | 137.683973 | 82.721725  | -0.2490  | 0.0000  | -0.0056  | 0.0000  | -0.0125  | 0.0000  | -0.2671          | -0.0186           |
| 14.000000 | 163.927057 | 175.625996 | 347.306616 | 86.726525  | 346.216854 | 0.1898   | 0.0000  | -0.0069  | 0.0000  | -0.0141  | 0.0000  | 0.1688           | -0.0147           |
| 14.000000 | 167.305818 | 183.487761 | 111.379063 | 26.772731  | 59.501413  | 0.6559   | 0.0000  | -0.0087  | 0.0000  | -0.0123  | 0.0000  | 0.6348           | 0.0046            |
| 14.295940 | 108.370984 | 245.563843 | 112.505158 | 99.273552  | 105.031704 | 0.0115   | 0.0000  | -0.0026  | 0.0000  | -0.0121  | 0.0000  | -0.0033          | -0.0092           |
| 14.480582 | 80.631220  | 255.279871 | 8.032994   | 56.860817  | 249.465243 | 0.2263   | 0.0000  | -0.0021  | 0.0000  | -0.0118  | 0.0000  | 0.2123           | -0.0101           |
| 14.674439 | 50.599977  | 196.174792 | 201.009517 | 22.666173  | 155.246366 | -0.3466  | 0.0000  | -0.0033  | 0.0000  | -0.0108  | 0.0000  | -0.3607          | -0.0049           |
| 14.674439 | 139.947098 | 301.093814 | 264.141346 | 118.516751 | 34.456410  | -0.2563  | 0.0000  | -0.0029  | 0.0000  | -0.0113  | 0.0000  | -0.2705          | -0.0103           |
| 14.820214 | 154.981718 | 260.870327 | 180.000000 | 25.018282  | 279.129673 | 0.3757   | 0.0000  | -0.0052  | 0.0000  | -0.0086  | 0.0000  | 0.3619           | 0.0057            |
| 14.988074 | 67.568822  | 223.047221 | 90.975896  | 121.860159 | 88.490493  | 0.1277   | 0.0000  | -0.0017  | 0.0000  | -0.0098  | 0.0000  | 0.1162           | -0.0029           |
| 14.988074 | 85.783411  | 230.004768 | 106.265646 | 146.709078 | 84.051029  | 0.0098   | 0.0000  | -0.0019  | 0.0000  | -0.0084  | 0.0000  | -0.0005          | -0.0012           |
| 4.400000  | 150.960000 | 111.910000 | 338.530000 | 141.630000 | 174.220000 | -14.4940 | 42.3591 | -23.1929 | 19.2164 | -22.5420 | 3.0884  | 4.4350           | -0.0360           |
| 5.400000  | 100.190000 | 116.830000 | 1.060000   | 125.640000 | 176.450000 | -15.0258 | 33.9856 | -16.2185 | 14.1479 | -16.4524 | 2.3780  | 2.8147           | 0.1326            |
| 5.900000  | 114.090000 | 88.040000  | 134.530000 | 34.230000  | 162.560000 | -8.6573  | 26.1755 | -11.7663 | 7.7975  | -15.3852 | 1.7500  | -0.0858          | -0.0398           |
| 5.900000  | 117.530000 | 274.580000 | 254.160000 | 32.000000  | 207.830000 | -5.5896  | 31.9262 | -13.2816 | 9.2716  | -15.6080 | 1.8880  | 8.6067           | 0.0468            |
| 6.400000  | 85.080000  | 119.890000 | 163.340000 | 24.720000  | 189.810000 | -13.6072 | 27.7188 | -14.0170 | 10.7123 | -12.3133 | 1.7107  | 0.2042           | -0.0933           |
| 4.600000  | 17.450000  | 39.010000  | 8.690000   | 32.560000  | 99.950000  | -11.1351 | 35.8200 | -17.3336 | 13.7424 | -18.9807 | 2.4671  | 4.5801           | -0.4620           |
| 4.600000  | 29.050000  | 1.840000   | 159.510000 | 27.900000  | 239.050000 | -16.7277 | 51.1006 | -27.4742 | 24.1433 | -20.1635 | 3.0954  | 13.9739          | 1.0032            |
| 4.600000  | 161.330000 | 27.050000  | 114.090000 | 153.900000 | 198.220000 | -10.5573 | 35.9700 | -17.5389 | 14.7688 | -18.9025 | 2.4707  | 6.2108           | 0.0551            |
| 4.700000  | 5.640000   | 0.640000   | 164.730000 | 67.300000  | 283.950000 | -16.4338 | 39.5795 | -19.4837 | 16.0488 | -19.8582 | 2.6077  | 2.4603           | 0.1462            |
| 4.800000  | 179.500000 | 313.000000 | 14.510000  | 142.580000 | 208.560000 | -7.6663  | 25.0695 | -12.9695 | 10.0893 | -15.1384 | 1.7998  | 1.1844           | 0.1314            |
| 4.900000  | 103.880000 | 133.810000 | 288.360000 | 145.340000 | 218.840000 | -14.0585 | 34.1186 | -15.4074 | 12.4482 | -18.0749 | 2.2959  | 1.3218           | 0.1187            |
| 5.100000  | 46.470000  | 0.420000   | 132.840000 | 33.350000  | 63.760000  | -14.5280 | 36.5362 | -17.9140 | 15.3319 | -16.0954 | 2.3860  | 5.7167           | 0.7273            |
| 5.300000  | 86.850000  | 151.120000 | 29.730000  | 129.370000 | 198.620000 | -20.7556 | 53.3226 | -28.3189 | 26.3563 | -20.4279 | 3.5263  | 13.7029          | 1.7461            |
| 5.800000  | 113.080000 | 137.010000 | 282.160000 | 4.970000   | 354.490000 | -1.6788  | 21.2812 | -11.7568 | 8.3740  | -13.5301 | 1.6489  | 4.3384           | 0.6486            |
| 5.800000  | 124.720000 | 244.850000 | 162.600000 | 22.170000  | 178.500000 | -2.4827  | 16.6111 | -9.1727  | 6.1597  | -12.6510 | 1.3658  | -0.1698          | 0.1973            |
| 5.900000  | 114.240000 | 126.600000 | 348.900000 | 2.080000   | 349.930000 | -0.2405  | 14.5209 | -8.3983  | 5.7312  | -11.1390 | 1.2184  | 1.6927           | 0.1291            |
| 6.000000  | 90.560000  | 222.730000 | 355.790000 | 113.070000 | 179.550000 | -20.3948 | 46.2401 | -25.6365 | 23.5665 | -17.9486 | 3.3099  | 9.1366           | 0.6559            |
| 6.100000  | 89.390000  | 218.940000 | 220.700000 | 10.940000  | 143.020000 | -11.6560 | 31.0950 | -16.4395 | 12.4158 | -14.8235 | 2.1380  | 2.7299           | 0.4218            |
| 6.200000  | 104.190000 | 87.720000  | 78.730000  | 13.200000  | 226.760000 | -6.3592  | 21.8062 | -11.1387 | 7.8083  | -10.2552 | 1.3105  | 3.1719           | 0.1053            |
| 6.200000  | 142.660000 | 16.670000  | 186.740000 | 82.830000  | 340.260000 | -10.5516 | 24.6739 | -11.1112 | 7.2264  | -13.8466 | 1.6124  | -1.9966          | 0.0210            |
| 6.300000  | 99.480000  | 209.660000 | 339.680000 | 15.130000  | 204.020000 | 2.6842   | 11.7794 | -5.7020  | 3.3643  | -9.0314  | 0.8209  | 3.9155           | -0.3309           |
| 6.300000  | 104.230000 | 237.210000 | 285.970000 | 71.680000  | 127.660000 | -8.2988  | 24.2294 | -11.1358 | 8.9081  | -13.3369 | 1.7841  | 2.1501           | 0.3625            |
| 4.400000  | 23.790000  | 1.670000   | 241.310000 | 41.060000  | 10.430000  | -10.7231 | 33.8264 | -16.3433 | 12.9782 | -19.7886 | 2.3294  | 2.2791           | 0.7283            |
| 4.400000  | 120.610000 | 183.870000 | 244.600000 | 154.180000 | 189.750000 | -8.8869  | 36.9364 | -18.7007 | 15.0160 | -22.5063 | 2.7563  | 4.6149           | 0.1000            |
| 4.500000  | 23.230000  | 345.110000 | 71.190000  | 55.370000  | 348.850000 | -7.7444  | 28.7005 | -15.5181 | 11.7129 | -18.5767 | 2.0876  | 0.6618           | 0.1058            |
| 5.900000  | 123.380000 | 214.220000 | 211.500000 | 23.730000  | 203.770000 | -2.7449  | 18.4450 | -9.8450  | 6.5029  | -12.6510 | 1.4243  | 1.1312           | -0.3581           |
| 6.000000  | 177.120000 | 170.440000 | 73.410000  | 32.330000  | 102.810000 | 2.7119   | 16.7216 | -7.9245  | 4.5127  | -9.9493  | 1.0518  | 7.1242           | -0.6401           |
| 6.100000  | 142.660000 | 16.670000  | 186.740000 | 82.830000  | 340.260000 | -13.4293 | 33.4592 | -14.9620 | 10.2296 | -16.3841 | 2.0906  | 1.0040           | -0.2100           |
| 6.500000  | 45.000000  | 45.000000  | 135.000000 | 45.000000  | 135.000000 | -6.3138  | 20.4830 | -8.5786  | 7.8902  | -7.4542  | 1.1885  | 7.2152           | -1.1627           |
| 6.500000  | 135.000000 | 135.000000 | 135.000000 | 45.000000  | 135.000000 | -4.6248  | 15.2282 | -6.9807  | 4.5040  | -8.2271  | 0.9545  | 0.8541           | 0.4995            |
| 6.800000  | 45.000000  | 45.000000  | 135.000000 | 135.000000 | 135.000000 | 0.9331   | 0.2481  | -0.1475  | 0.0450  | -1.1260  | 0.0236  | -0.0236          | 0.0522            |
| 6.200000  | 96.070000  | 178.760000 | 271.950000 | 59.490000  | 282.790000 | -2.5930  | 21.1615 | -9.1504  | 6.5128  | -12.3432 | 1.4546  | 5.0423           | 0.7405            |
| 6.200000  | 118.920000 | 104.430000 | 263.820000 | 74.120000  | 4.200000   | -2.4126  | 20.4808 | -8.7782  | 6.4090  | -11.8052 | 1.3946  | 5.2884           | 0.4363            |
| 6.300000  | 117.470000 | 63.570000  | 65.550000  | 96.920000  | 9.840000   | -7.8294  | 29.4035 | -10.8343 | 7.5522  | -14.3997 | 1.7664  | 5.6588           | -1.6032           |
| 6.400000  | 88.620000  | 168.440000 | 39.890000  | 70.030000  | 241.490000 | -5.4382  | 24.9507 | -9.2495  | 6.5969  | -12.7495 | 1.5192  | 5.6297           | -0.8209           |

continued on next page

| $R$      | $\beta_A$  | $\gamma_A$ | $\alpha_B$  | $\beta_B$  | $\gamma_B$ | elst     | exch    | ind      | ex-ind  | disp     | ex-disp | $E_{\text{int}}$ | $E_{\text{diff}}$ |
|----------|------------|------------|-------------|------------|------------|----------|---------|----------|---------|----------|---------|------------------|-------------------|
| 6.400000 | 116.980000 | 270.090000 | 122.530000  | 96.260000  | 350.980000 | -8.0502  | 22.8728 | -9.2136  | 6.6990  | -11.3934 | 1.3769  | 2.2916           | -0.6099           |
| 6.400000 | 133.030000 | 294.870000 | 93.330000   | 102.560000 | 350.170000 | -6.6333  | 27.1521 | -10.7909 | 7.7102  | -12.7045 | 1.5959  | 6.3295           | -0.9631           |
| 6.700000 | 87.340000  | 182.780000 | 228.060000  | 64.510000  | 135.020000 | -18.9223 | 40.4612 | -16.2361 | 12.2504 | -13.6960 | 2.0830  | 5.9402           | 1.3150            |
| 4.500000 | 10.610000  | 318.130000 | 195.910000  | 114.030000 | 275.000000 | -23.4937 | 54.0460 | -28.8852 | 24.6546 | -25.9797 | 3.8415  | 4.1836           | 0.6911            |
| 4.700000 | 23.870000  | 0.990000   | 142.270000  | 51.010000  | 243.240000 | -15.7531 | 48.7570 | -24.1954 | 21.2659 | -18.8609 | 2.7062  | 13.9196          | 1.1697            |
| 5.200000 | 48.620000  | 59.380000  | 84.530000   | 133.410000 | 232.020000 | -7.1456  | 23.4810 | -9.6865  | 9.0051  | -9.6652  | 1.2746  | 7.2635           | -0.5254           |
| 6.300000 | 112.880000 | 73.360000  | 208.830000  | 101.760000 | 1.620000   | -12.6858 | 39.9896 | -14.9963 | 11.7752 | -16.0596 | 2.2913  | 10.3144          | -1.0645           |
| 5.800000 | 140.190000 | 263.980000 | 136.480000  | 153.330000 | 45.610000  | -14.7776 | 36.3279 | -19.3841 | 17.5130 | -14.5153 | 2.5330  | 7.6968           | 1.8430            |
| 6.000000 | 89.890000  | 125.850000 | 118.210000  | 63.560000  | 37.230000  | -19.9717 | 46.0889 | -29.1669 | 26.0899 | -20.1213 | 3.4329  | 6.3518           | 0.7777            |
| 6.400000 | 42.020000  | 136.220000 | 142.590000  | 49.340000  | 305.640000 | -16.7906 | 37.3858 | -19.8751 | 18.3757 | -13.3769 | 2.5824  | 8.3014           | 1.7825            |
| 6.400000 | 126.220000 | 225.050000 | 152.290000  | 129.560000 | 11.430000  | -13.9257 | 30.5096 | -14.2350 | 12.3595 | -12.3355 | 1.9121  | 4.2850           | -0.2002           |
| 6.500000 | 116.360000 | 256.730000 | 245.040000  | 101.100000 | 330.760000 | -11.4369 | 28.8563 | -15.8187 | 13.9845 | -12.3210 | 1.9527  | 5.2169           | -0.1863           |
| 6.600000 | 113.980000 | 137.130000 | 118.960000  | 127.950000 | 326.550000 | -18.5219 | 42.4342 | -24.4552 | 22.5766 | -13.8876 | 2.6944  | 10.8405          | -0.3202           |
| 6.300000 | 131.720000 | 116.890000 | 198.690000  | 139.450000 | 39.040000  | -20.2241 | 46.7640 | -26.3022 | 24.2009 | -15.0497 | 3.0473  | 12.4362          | 1.1123            |
| 6.500000 | 48.940000  | 219.930000 | 134.740000  | 60.810000  | 69.540000  | -19.7496 | 47.9399 | -27.9691 | 25.5609 | -15.4828 | 3.0845  | 13.3837          | -1.0730           |
| 6.500000 | 50.010000  | 157.000000 | 221.600000  | 59.550000  | 48.230000  | -17.4397 | 37.9623 | -20.7697 | 18.9892 | -13.6362 | 2.4545  | 7.5603           | -1.1988           |
| 4.800000 | 156.210000 | 283.620000 | 299.580000  | 134.550000 | 207.210000 | -13.8431 | 39.4105 | -20.6380 | 16.6795 | -20.5601 | 2.8697  | 3.9186           | -0.3238           |
| 5.000000 | 172.500000 | 61.460000  | 95.960000   | 130.380000 | 168.020000 | -13.5391 | 38.7559 | -19.9137 | 17.0048 | -19.4847 | 2.8893  | 5.7125           | -0.1754           |
| 5.900000 | 112.190000 | 258.680000 | 318.020000  | 65.120000  | 76.340000  | -4.0649  | 23.7383 | -10.8707 | 8.4306  | -15.0796 | 1.7878  | 3.9414           | 0.0961            |
| 6.300000 | 128.050000 | 9.280000   | 188.170000  | 47.690000  | 205.110000 | -21.9679 | 44.1082 | -21.7731 | 15.6920 | -19.4326 | 2.7646  | -0.6088          | -0.2182           |
| 6.500000 | 92.410000  | 187.370000 | 240.780000  | 59.860000  | 247.740000 | -1.7004  | 19.7449 | -7.2130  | 4.6296  | -10.4893 | 1.1124  | 6.0842           | -0.1992           |
| 6.700000 | 83.570000  | 118.480000 | 183.140000  | 100.370000 | 66.190000  | -12.9404 | 31.0764 | -15.3126 | 13.5896 | -15.1269 | 2.3093  | 3.5954           | 0.2084            |
| 4.600000 | 56.200000  | 145.060000 | 83.300000   | 164.990000 | 214.890000 | -20.5478 | 50.2696 | -26.7082 | 23.3869 | -24.7311 | 3.6817  | 5.3511           | 0.5422            |
| 4.400000 | 56.200000  | 145.060000 | 83.300000   | 164.990000 | 214.890000 | -32.2567 | 81.3414 | -44.1848 | 39.2898 | -32.5255 | 5.5302  | 17.1943          | 1.1429            |
| 4.500000 | 56.200000  | 145.060000 | 83.300000   | 164.990000 | 214.890000 | -25.6574 | 63.7917 | -34.2499 | 30.2890 | -28.3418 | 4.5153  | 10.3468          | 0.9706            |
| 4.700000 | 56.200000  | 145.060000 | 83.300000   | 164.990000 | 214.890000 | -16.5578 | 39.6890 | -20.9175 | 18.1542 | -21.6079 | 3.0015  | 1.7615           | 0.0591            |
| 4.800000 | 56.200000  | 145.060000 | 83.300000   | 164.990000 | 214.890000 | -13.4150 | 31.4387 | -16.4420 | 14.1024 | -18.9030 | 2.4453  | -0.7736          | -0.3825           |
| 5.800000 | 126.620000 | 105.710000 | 108.900000  | 24.360000  | 186.100000 | -3.1579  | 21.5466 | -10.0830 | 6.6084  | -13.7181 | 1.4861  | 2.6822           | -0.5268           |
| 6.200000 | 172.230000 | 227.860000 | 248.530000  | 55.600000  | 265.600000 | 1.7295   | 13.7918 | -6.1827  | 3.4047  | -8.3057  | 0.7936  | 5.2311           | 0.2474            |
| 4.601939 | 7.547218   | 347.050415 | 125.641417  | 35.916162  | 250.162945 | -5.6000  | 18.2444 | -10.3458 | 7.4945  | -15.9071 | 1.5542  | -4.5599          | 0.0354            |
| 5.117744 | 24.835092  | 8.410603   | 323.312032  | 119.355701 | 31.147809  | -6.9526  | 15.3021 | -7.3067  | 5.6182  | -12.8969 | 1.2600  | -4.9760          | 0.0472            |
| 5.821218 | 161.002349 | 69.139112  | 47.557344   | 160.050450 | 14.789560  | -5.0558  | 6.5911  | -3.6651  | 2.0356  | -7.7064  | 0.5920  | -7.2084          | 0.0680            |
| 6.433707 | 160.999939 | 126.515243 | -41.227257  | 146.041992 | 288.046499 | -6.1796  | 7.0097  | -3.4325  | 2.1221  | -5.8412  | 0.5844  | -5.7370          | -0.0208           |
| 6.480073 | 135.595067 | 157.256810 | 91.494531   | 85.330144  | 236.272338 | -5.7919  | 9.2666  | -3.8446  | 2.0269  | -7.5910  | 0.6819  | -5.2522          | -0.1070           |
| 6.485282 | 161.059547 | 222.989971 | -28.514838  | 114.163373 | 238.964570 | -4.6205  | 5.3983  | -2.5000  | 1.1382  | -5.0943  | 0.3971  | -5.2812          | -0.0309           |
| 6.771644 | 63.403944  | 192.895632 | 198.305192  | 36.406068  | 158.008320 | -8.3816  | 6.5317  | -3.2658  | 1.5914  | -7.1426  | 0.5306  | -10.1362         | -0.0292           |
| 6.893849 | 82.062596  | 223.471040 | 179.891271  | 48.560431  | 191.721357 | -8.2986  | 8.0270  | -4.7846  | 3.1928  | -8.1680  | 0.7563  | -9.2751          | 0.1299            |
| 7.270942 | 84.035582  | 360.000000 | -180.000000 | 6.713428   | 360.000000 | -5.8875  | 5.2242  | -2.6148  | 1.4083  | -4.8398  | 0.4640  | -6.2456          | -0.0605           |
| 7.359749 | 165.900026 | 211.723553 | 47.909958   | 94.656096  | 171.121125 | -6.0591  | 4.8511  | -2.4182  | 1.2183  | -4.4237  | 0.4183  | -6.4133          | 0.0805            |
| 7.386974 | 86.792721  | 355.303165 | -23.947366  | 17.413101  | 346.518216 | -6.1393  | 4.9665  | -2.4621  | 1.2654  | -4.4668  | 0.4266  | -6.4097          | -0.1305           |
| 4.862575 | 12.028689  | 358.803678 | 119.024605  | 43.011929  | 16.106250  | -4.2455  | 9.7323  | -5.3275  | 3.7067  | -10.6753 | 0.8521  | -5.9572          | -0.1267           |
| 4.867030 | 32.647000  | 334.276849 | -71.897936  | 77.855240  | 212.626266 | -15.8664 | 34.4048 | -18.1343 | 14.7322 | -20.2158 | 2.6294  | -2.4502          | -0.2200           |
| 4.881111 | 127.789778 | 180.000000 | 360.000000  | 160.024826 | 180.000000 | -1.3055  | 8.4301  | -4.1541  | 2.6770  | -10.4943 | 0.7550  | -4.0918          | -0.0612           |
| 5.080893 | 74.727129  | 211.765304 | -127.128649 | 165.210904 | 199.475591 | -7.1302  | 14.2814 | -7.4363  | 5.6930  | -13.2774 | 1.2312  | -6.6382          | 0.0748            |
| 5.127425 | 5.616267   | 57.281919  | 168.949263  | 80.989413  | 206.285267 | -13.8783 | 25.8253 | -13.8999 | 11.0873 | -17.1233 | 2.0858  | -5.9031          | 0.3242            |
| 6.144437 | 104.425976 | 116.068140 | 124.949797  | 75.574024  | 296.068140 | -8.4679  | 12.8316 | -8.4718  | 7.0956  | -11.3915 | 1.2173  | -7.1867          | 0.0166            |
| 6.230661 | 97.524483  | 126.938519 | 180.000000  | 82.475517  | 53.061480  | -12.5255 | 18.2959 | -11.7173 | 10.3104 | -13.1302 | 1.6285  | -7.1383          | 0.0995            |
| 6.596693 | 139.433348 | 319.290009 | -169.775778 | 101.939682 | 242.476278 | -6.7504  | 4.8981  | -2.3103  | 1.0897  | -6.1013  | 0.4000  | -8.7742          | -0.0037           |
| 6.674847 | 79.734797  | 183.021784 | 168.599851  | 34.939905  | 177.516452 | -6.0956  | 6.8139  | -3.6164  | 1.7173  | -7.2332  | 0.5394  | -7.8745          | 0.0701            |
| 7.037513 | 129.911701 | 338.339565 | 205.629777  | 96.116603  | 71.740322  | -6.8075  | 5.3056  | -3.3883  | 2.2072  | -6.3257  | 0.5229  | -8.4858          | -0.0708           |
| 7.193672 | 80.136846  | 167.635474 | 172.252019  | 107.547583 | 6.450970   | -5.7389  | 5.2724  | -1.9552  | 1.0561  | -5.4421  | 0.3860  | -6.4217          | 0.0352            |
| 5.065998 | 71.881295  | 269.943562 | 156.740566  | 168.381147 | 186.590147 | -5.7786  | 10.5858 | -5.4673  | 4.1129  | -11.2718 | 0.9424  | -6.8766          | 0.0038            |
| 5.450399 | 0.908805   | 329.179236 | -152.979440 | 76.069704  | 151.580257 | -8.1597  | 12.0655 | -6.5355  | 4.6808  | -11.4431 | 1.0464  | -8.3458          | -0.1064           |
| 6.214493 | 109.220843 | 110.088083 | 120.399650  | 70.779157  | 290.088083 | -4.7883  | 7.4761  | -4.7996  | 3.5491  | -8.6237  | 0.7372  | -6.4490          | -0.0176           |
| 6.568900 | 140.674747 | 39.037520  | 172.718019  | 103.140668 | 116.590813 | -6.8577  | 4.9957  | -2.4013  | 1.1497  | -6.2537  | 0.4147  | -8.9525          | -0.0228           |
| 6.600000 | 70.890000  | 33.570000  | 163.730000  | 30.970000  | 199.770000 | -11.3730 | 25.7892 | -11.9936 | 10.2431 | -11.0558 | 1.7079  | 3.3178           | 0.5560            |
| 6.600000 | 141.720000 | 332.290000 | 251.830000  | 108.220000 | 158.050000 | -12.9770 | 27.7797 | -13.0128 | 11.0239 | -12.1491 | 1.8521  | 2.5169           | 0.5355            |
| 6.753736 | 143.811551 | 341.217734 | 198.298143  | 116.928172 | 12.207631  | -8.4489  | 6.8440  | -3.3722  | 1.6683  | -7.3188  | 0.5503  | -10.0772         | 0.0058            |
| 6.943306 | 135.606032 | 356.786247 | 173.099047  | 102.232651 | 328.818388 | -8.0644  | 6.4159  | -3.7295  | 2.1189  | -7.1627  | 0.5802  | -9.8416          | -0.0929           |
| 7.011711 | 133.728457 | 358.760145 | 194.340245  | 95.874272  | 83.919926  | -6.5521  | 4.0224  | -2.6331  | 1.4240  | -5.8106  | 0.3972  | -9.1521          | 0.0744            |
| 7.300000 | 93.790000  | 349.420000 | 260.310000  | 42.460000  | 177.420000 | -13.3310 | 26.8589 | -13.7209 | 11.7545 | -11.4073 | 1.8705  | 2.0247           | -0.3053           |
| 7.500000 | 131.800000 | 348.090000 | 53.770000   | 67.540000  | 201.900000 | -6.3345  | 19.5890 | -9.2398  | 7.9596  | -9.1647  | 1.4234  | 4.2330           | -1.0704           |
| 5.152972 | 75.541817  | 149.435262 | 134.150106  | 163.329569 | 164.448439 | -5.9133  | 11.5014 | -6.0276  | 4.5127  | -11.7547 | 1.0063  | -6.6752          | 0.0881            |
| 5.198744 | 45.939368  | 12.735056  | -15.876189  | 63.269430  | 162.226241 | -10.5944 | 24.3027 | -11.8742 | 8.9401  | -17.5385 | 1.9753  | -4.7890          | 0.4464            |
| 6.134730 | 110.983797 | 135.282887 | 194.262911  | 38.110440  | 191.184107 | -6.3325  | 11.4921 | -6.6899  | 4.2556  | -11.0109 | 1.0145  | -7.2711          | 0.0288            |
| 6.326080 | 118.544531 | 128.170810 | 46.094544   | 63.598071  | 53.102967  | 3.2428   | 4.8775  | -2.9315  | 1.8412  | -6.5556  | 0.4931  | 0.9674           | 0.3714            |

continued on next page

| $R$      | $\beta_A$  | $\gamma_A$ | $\alpha_B$  | $\beta_B$  | $\gamma_B$ | elst     | exch     | ind      | ex-ind  | disp     | ex-disp | $E_{\text{int}}$ | $E_{\text{diff}}$ |
|----------|------------|------------|-------------|------------|------------|----------|----------|----------|---------|----------|---------|------------------|-------------------|
| 6.554726 | 120.173905 | 135.207671 | 144.207050  | 80.403323  | 243.777014 | -5.3692  | 5.7466   | -2.4750  | 1.2665  | -6.2458  | 0.4498  | -6.6271          | 0.0719            |
| 6.566539 | 128.131774 | 0.277956   | -175.042354 | 51.868226  | 180.277950 | -14.5196 | 19.5937  | -9.3872  | 6.0176  | -14.1024 | 1.5670  | -10.8308         | -0.0143           |
| 6.607355 | 77.895048  | 63.665023  | -176.914973 | 39.337955  | 143.905496 | -6.7997  | 4.7922   | -2.3520  | 1.1192  | -6.1055  | 0.3992  | -8.9466          | 0.0042            |
| 6.713344 | 40.820128  | 95.113514  | 102.927126  | 4.879511   | 64.926470  | -5.1326  | 5.2627   | -2.5795  | 1.4324  | -4.7270  | 0.4443  | -5.2998          | 0.1119            |
| 4.397001 | 25.854349  | 12.985770  | -117.270411 | 31.701679  | 271.214609 | -7.4566  | 23.6099  | -12.4112 | 9.4033  | -17.8520 | 1.8654  | -2.8412          | 0.1830            |
| 4.400000 | 16.600000  | 246.230000 | 146.730000  | 119.710000 | 269.010000 | -31.6594 | 70.9293  | -38.9616 | 33.0004 | -29.8517 | 4.7224  | 8.1794           | -0.1610           |
| 4.553824 | 27.298897  | 16.072519  | -87.892124  | 46.281275  | 8.060680   | -6.5727  | 19.5696  | -9.9293  | 7.2492  | -15.7279 | 1.5350  | -3.8760          | -0.0700           |
| 4.800000 | 64.720000  | 86.110000  | 175.820000  | 162.530000 | 82.750000  | -20.2417 | 46.8224  | -27.1447 | 23.8127 | -20.2632 | 3.0882  | 6.0738           | 0.3980            |
| 5.900494 | 115.256000 | 201.655649 | 167.398045  | 66.851999  | 22.076290  | -22.5149 | 121.9454 | -45.9476 | 30.4394 | -27.9603 | 3.8582  | 59.8201          | 1.0449            |
| 6.225811 | 138.159879 | 165.360362 | 183.634725  | 85.973129  | 347.489416 | -6.0632  | 66.4070  | -27.8503 | 16.3553 | -17.8293 | 2.0481  | 33.0677          | -1.1403           |
| 6.570783 | 128.572546 | 352.314453 | 180.000000  | 51.427454  | 187.685546 | -14.0217 | 17.4990  | -8.9350  | 5.6787  | -13.3198 | 1.4422  | -11.6567         | -0.0462           |
| 6.682455 | 130.953390 | 162.723263 | 64.947406   | 28.428350  | 37.830674  | 5.3762   | 4.7342   | -2.5951  | 0.8893  | -4.6252  | 0.3096  | 4.0890           | -0.1551           |
| 6.689685 | 138.467543 | 222.213974 | 49.639532   | 60.278951  | 344.275236 | 4.3864   | 5.7976   | -2.7410  | 1.1209  | -5.1128  | 0.3669  | 3.8180           | -0.3647           |
| 6.761062 | 117.394895 | 161.822293 | 48.067528   | 42.057804  | 39.262996  | 4.3315   | 5.0926   | -2.4082  | 0.9377  | -4.6881  | 0.3154  | 3.5809           | 0.2494            |
| 7.023924 | 127.150811 | 195.791507 | 281.232529  | 30.556358  | 340.191831 | 4.8533   | 3.6340   | -0.9720  | 0.3044  | -3.3825  | 0.2091  | 4.6464           | 0.6445            |
| 4.197001 | 25.854349  | 12.985770  | -117.270411 | 31.701679  | 271.214609 | -12.8896 | 40.1565  | -21.1079 | 17.0397 | -23.9641 | 2.9987  | 2.2333           | 0.3187            |
| 4.400000 | 12.930000  | 295.880000 | 178.570000  | 122.690000 | 265.980000 | -22.0431 | 48.9926  | -26.3289 | 22.7456 | -24.1230 | 3.5060  | 2.7494           | 0.0963            |
| 4.400000 | 64.330000  | 277.110000 | 161.410000  | 169.940000 | 232.490000 | -19.1028 | 44.2161  | -22.7082 | 19.6354 | -23.6333 | 3.2830  | 1.6901           | 0.0408            |
| 4.600000 | 8.090000   | 276.180000 | 157.460000  | 116.060000 | 271.190000 | -21.3647 | 47.5263  | -24.6848 | 20.7934 | -23.6541 | 3.3698  | 1.9858           | 0.2228            |
| 4.600000 | 16.140000  | 320.870000 | 252.160000  | 122.320000 | 33.740000  | -20.7462 | 50.9300  | -26.9865 | 23.6687 | -25.1451 | 3.7299  | 5.4507           | 0.8224            |
| 4.900000 | 22.330000  | 68.310000  | 184.430000  | 118.790000 | 89.950000  | -12.8712 | 29.4029  | -15.2239 | 13.2536 | -16.2659 | 2.1161  | 0.4117           | 0.3739            |
| 5.000000 | 2.590000   | 38.660000  | 136.570000  | 75.640000  | 201.510000 | -23.1188 | 49.8202  | -26.5371 | 22.0275 | -23.2378 | 3.4431  | 2.3971           | 0.6520            |
| 5.000000 | 14.210000  | 299.600000 | 191.720000  | 81.850000  | 161.340000 | -25.8557 | 56.9077  | -31.5130 | 26.5224 | -24.3828 | 3.8476  | 5.5262           | 0.8778            |
| 5.000000 | 96.740000  | 18.760000  | 116.540000  | 175.170000 | 207.620000 | -23.0349 | 45.8620  | -26.8318 | 22.5028 | -22.6849 | 3.4126  | -0.7742          | -0.3496           |
| 5.000000 | 102.380000 | 19.770000  | 124.360000  | 171.380000 | 216.310000 | -23.6524 | 50.2685  | -28.3546 | 23.9284 | -22.9581 | 3.5192  | 2.7509           | 0.0681            |
| 5.000000 | 102.380000 | 19.770000  | 124.360000  | 171.380000 | 216.310000 | -23.6524 | 50.2685  | -28.3546 | 23.9284 | -22.9581 | 3.5192  | 2.7509           | 0.0681            |
| 4.300000 | 71.450000  | 79.750000  | 54.490000   | 153.320000 | 218.700000 | -20.9253 | 52.3874  | -27.8288 | 23.5768 | -26.4656 | 3.8068  | 4.5513           | -0.8156           |
| 4.772615 | 100.211858 | 335.163618 | -145.062498 | 175.291838 | 152.545533 | -27.6377 | 58.8885  | -33.4951 | 28.0628 | -27.8307 | 4.3611  | 2.3491           | 0.3266            |
| 5.200000 | 100.620000 | 329.400000 | 95.450000   | 144.710000 | 231.390000 | -20.6580 | 48.1850  | -26.3555 | 22.9764 | -19.6328 | 3.0664  | 7.5815           | 0.1395            |
| 6.514119 | 103.471810 | 197.004047 | 250.536881  | 27.390141  | 18.759810  | 1.4635   | 12.8343  | -5.3367  | 2.7321  | -7.5386  | 0.6842  | 4.8388           | 0.1021            |
| 6.725422 | 111.531778 | 168.974872 | 273.548237  | 50.095546  | 24.912084  | 2.3458   | 8.7933   | -3.5270  | 1.7314  | -6.0723  | 0.5093  | 3.7805           | 0.1120            |
| 6.735543 | 129.610131 | 207.491315 | 274.164032  | 70.056943  | 350.657316 | 2.2919   | 8.0260   | -3.2512  | 1.5346  | -5.8926  | 0.4713  | 3.1800           | 0.2455            |
| 4.200000 | 26.150000  | 349.210000 | 112.350000  | 35.590000  | 93.070000  | -12.7381 | 40.6986  | -21.6902 | 17.5545 | -24.2800 | 3.0616  | 2.6064           | -0.3821           |
| 4.500000 | 70.670000  | 87.800000  | 83.460000   | 151.840000 | 183.000000 | -17.8024 | 44.5445  | -24.3305 | 21.1838 | -23.7201 | 3.3831  | 3.2583           | -0.9937           |
| 4.800000 | 2.090000   | 26.580000  | 292.930000  | 75.050000  | 152.420000 | -25.8978 | 58.1052  | -29.5834 | 25.0494 | -26.5292 | 4.0545  | 5.1986           | 0.5169            |
| 4.800000 | 24.240000  | 58.060000  | 185.950000  | 118.670000 | 88.100000  | -15.3702 | 35.8922  | -18.4310 | 16.0665 | -18.5114 | 2.5314  | 2.1774           | 0.3858            |
| 4.800000 | 102.780000 | 23.040000  | 83.000000   | 176.760000 | 140.610000 | -29.2107 | 63.2192  | -35.5384 | 29.6154 | -29.2041 | 4.6212  | 3.5026           | -0.6290           |
| 5.300000 | 96.230000  | 23.900000  | 70.630000   | 175.340000 | 128.610000 | -18.9158 | 37.6455  | -23.5536 | 20.1416 | -18.5657 | 2.7853  | -0.4628          | 0.4352            |
| 3.600000 | 34.188652  | 279.127380 | 180.000000  | 145.811348 | 260.872620 | -50.1743 | 126.0787 | -66.0373 | 60.7216 | -43.6606 | 7.7346  | 34.6626          | 2.6485            |
| 3.850000 | 34.188652  | 279.127380 | 180.000000  | 145.811348 | 260.872620 | -26.5464 | 63.3052  | -31.9404 | 29.0859 | -30.3724 | 4.4037  | 7.9356           | 0.2770            |
| 4.000000 | 34.188652  | 279.127380 | 180.000000  | 145.811348 | 260.872620 | -18.4291 | 42.0738  | -20.9008 | 18.7130 | -24.5804 | 3.1228  | -0.0007          | -0.0824           |
| 4.200000 | 34.188652  | 279.127380 | 180.000000  | 145.811348 | 260.872620 | -11.6372 | 24.6667  | -12.1068 | 10.4818 | -18.6997 | 1.9734  | -5.3218          | -0.1048           |
| 4.416337 | 34.188652  | 279.127380 | 180.000000  | 145.811348 | 260.872620 | -7.3616  | 14.1157  | -6.9122  | 5.7084  | -14.0911 | 1.2092  | -7.3317          | -0.0034           |
| 5.000000 | 34.188652  | 279.127380 | 180.000000  | 145.811348 | 260.872620 | -2.5276  | 3.6343   | -1.8667  | 1.3469  | -7.0240  | 0.3554  | -6.0817          | 0.0393            |
| 6.000000 | 34.188652  | 279.127380 | 180.000000  | 145.811348 | 260.872620 | -0.1534  | 0.5284   | -0.3106  | 0.1664  | -2.4539  | 0.0585  | -2.1646          | -0.1575           |
| 6.500000 | 50.599977  | 196.174792 | 201.009517  | 22.666173  | 155.246366 | -9.6375  | 11.5852  | -4.7705  | 2.8241  | -8.7985  | 0.8420  | -7.9550          | -0.0469           |
| 7.000000 | 34.188652  | 279.127380 | 180.000000  | 145.811348 | 260.872620 | 0.5155   | 0.0695   | -0.0806  | 0.0126  | -0.9236  | 0.0083  | -0.3983          | -0.1419           |
| 7.000000 | 50.599977  | 196.174792 | 201.009517  | 22.666173  | 155.246366 | -5.3368  | 2.3424   | -1.3418  | 0.4212  | -4.0441  | 0.2000  | -7.7591          | 0.0013            |
| 4.300000 | 9.420000   | 286.980000 | 203.180000  | 119.920000 | 263.560000 | -21.5252 | 53.0137  | -27.2810 | 23.8719 | -25.7125 | 3.8088  | 6.1757           | 0.8211            |
| 4.500000 | 14.110000  | 355.500000 | 247.640000  | 116.430000 | 272.350000 | -22.9588 | 50.0689  | -28.7073 | 25.2187 | -24.8605 | 3.8081  | 2.5691           | -0.4203           |
| 4.500000 | 69.010000  | 270.370000 | 198.860000  | 154.830000 | 202.750000 | -20.6351 | 53.1563  | -27.3752 | 24.1678 | -24.9549 | 3.8134  | 8.1724           | 1.3686            |
| 4.600000 | 58.730000  | 93.060000  | 215.570000  | 173.070000 | 121.380000 | -17.3801 | 37.4960  | -20.2315 | 17.1201 | -20.6255 | 2.7911  | -0.8298          | -0.4092           |
| 4.800000 | 105.140000 | 21.920000  | 97.090000   | 168.450000 | 150.190000 | -27.0852 | 58.8021  | -33.9401 | 29.1014 | -27.8165 | 4.4416  | 3.5032           | -0.4634           |
| 4.900000 | 22.860000  | 331.810000 | 0.890000    | 81.990000  | 202.660000 | -23.4125 | 54.2011  | -28.3333 | 23.8310 | -24.4486 | 3.8307  | 5.6686           | 0.5822            |
| 4.900000 | 103.760000 | 335.090000 | 355.880000  | 163.390000 | 216.570000 | -23.9028 | 54.3608  | -28.2882 | 23.3309 | -24.4338 | 3.7781  | 4.8450           | 0.8692            |
| 5.000000 | 38.220000  | 349.680000 | 240.310000  | 88.890000  | 196.730000 | -18.4610 | 41.7890  | -22.4142 | 19.8261 | -20.9600 | 3.0895  | 2.8694           | 0.2297            |
| 5.000000 | 95.880000  | 331.300000 | 112.970000  | 158.980000 | 222.170000 | -18.0055 | 40.0779  | -23.4447 | 19.8572 | -20.3226 | 3.0126  | 1.1749           | -0.0582           |
| 4.200000 | 154.930000 | 81.830000  | 326.770000  | 156.180000 | 195.470000 | -10.7760 | 40.1343  | -21.0680 | 16.7698 | -24.7468 | 3.1209  | 3.4342           | -0.3002           |
| 4.300000 | 28.860000  | 6.750000   | 314.830000  | 32.800000  | 270.770000 | -8.4269  | 31.1674  | -17.0017 | 13.1518 | -21.1833 | 2.4361  | 0.1434           | 0.0669            |
| 4.500000 | 67.580000  | 95.550000  | 270.810000  | 167.200000 | 166.150000 | -22.2802 | 51.6525  | -28.7180 | 24.7681 | -25.2766 | 3.8351  | 3.9809           | -0.3764           |
| 4.700000 | 12.000000  | 350.540000 | 307.430000  | 85.800000  | 153.370000 | -26.6168 | 61.9769  | -35.6431 | 31.2049 | -26.5632 | 4.4145  | 8.7731           | 1.0919            |
| 4.700000 | 89.920000  | 338.010000 | 124.970000  | 148.720000 | 207.240000 | -24.9926 | 60.0811  | -33.4357 | 29.6026 | -26.7529 | 4.3424  | 8.8449           | 0.3570            |
| 4.800000 | 32.380000  | 345.780000 | 89.160000   | 81.400000  | 156.010000 | -25.6029 | 56.8841  | -33.0341 | 28.0069 | -26.6600 | 4.1832  | 3.7772           | -0.6663           |
| 4.900000 | 8.050000   | 40.700000  | 107.720000  | 83.740000  | 198.750000 | -23.3481 | 47.6316  | -27.4815 | 23.2237 | -23.7312 | 3.6060  | -0.0997          | -0.8392           |
| 4.900000 | 8.260000   | 265.400000 | 224.570000  | 86.420000  | 158.320000 | -23.3089 | 53.0752  | -30.0324 | 26.1476 | -24.3363 | 3.8489  | 5.3940           | -0.0385           |
| 4.900000 | 11.790000  | 38.550000  | 112.610000  | 79.720000  | 205.630000 | -21.7970 | 47.7295  | -27.0840 | 23.4158 | -22.7675 | 3.5087  | 3.0056           | 0.1887            |

continued on next page

| $R$      | $\beta_A$  | $\gamma_A$ | $\alpha_B$  | $\beta_B$  | $\gamma_B$ | elst     | exch    | ind      | ex-ind  | disp     | ex-disp | $E_{\text{int}}$ | $E_{\text{diff}}$ |
|----------|------------|------------|-------------|------------|------------|----------|---------|----------|---------|----------|---------|------------------|-------------------|
| 4.900000 | 12.190000  | 337.520000 | 102.520000  | 75.200000  | 195.000000 | -25.6597 | 56.5397 | -30.6596 | 26.0987 | -26.6346 | 4.1376  | 3.8221           | -0.1470           |
| 4.900000 | 18.530000  | 18.730000  | 298.180000  | 78.330000  | 153.890000 | -23.3035 | 50.9493 | -28.6577 | 25.1765 | -24.1152 | 3.8838  | 3.9332           | 0.0054            |
| 5.000000 | 96.300000  | 341.140000 | 268.700000  | 173.980000 | 133.720000 | -19.7157 | 42.7363 | -23.5698 | 20.0596 | -21.8225 | 3.2357  | 0.9234           | 0.1133            |
| 4.250000 | 8.130000   | 32.970000  | 117.310000  | 120.010000 | 94.040000  | -27.2691 | 67.7375 | -36.0206 | 31.7200 | -29.2922 | 4.7545  | 11.6301          | 0.9345            |
| 4.600000 | 175.130000 | 11.160000  | 108.070000  | 145.240000 | 183.330000 | -8.8652  | 31.7150 | -17.9008 | 14.1678 | -17.9013 | 2.2246  | 3.4402           | 0.1974            |
| 4.700000 | 89.780000  | 283.940000 | 351.180000  | 145.830000 | 186.070000 | -14.0525 | 39.4516 | -21.1470 | 17.9356 | -20.5543 | 2.7432  | 4.3766           | -0.4696           |
| 4.700000 | 179.320000 | 299.280000 | 127.900000  | 145.920000 | 165.970000 | -5.7796  | 21.9461 | -12.4441 | 9.4524  | -14.4320 | 1.5898  | 0.3325           | -0.1655           |
| 4.800000 | 33.300000  | 8.530000   | 82.140000   | 80.000000  | 160.350000 | -30.4230 | 69.6302 | -40.1040 | 35.1418 | -28.7030 | 4.8340  | 10.3760          | -0.1563           |
| 4.800000 | 100.610000 | 335.840000 | 288.130000  | 167.910000 | 176.110000 | -25.5651 | 55.9137 | -31.9498 | 27.6897 | -25.7812 | 4.1685  | 4.4757           | -0.1007           |
| 5.000000 | 42.900000  | 339.600000 | 153.580000  | 5.370000   | 248.090000 | -9.2660  | 28.2516 | -15.2579 | 12.4218 | -15.0717 | 1.9663  | 3.0441           | 0.0175            |
| 5.000000 | 106.160000 | 15.550000  | 112.510000  | 170.160000 | 162.290000 | -20.9309 | 45.9916 | -24.0895 | 20.1215 | -23.1756 | 3.3408  | 1.2580           | 0.0524            |
| 5.700000 | 136.710000 | 268.580000 | 298.090000  | 124.210000 | 183.830000 | -9.7595  | 26.7314 | -13.7650 | 11.1458 | -13.1359 | 1.9079  | 3.1247           | 0.3253            |
| 5.800000 | 169.390000 | 272.160000 | 245.720000  | 121.390000 | 191.870000 | -9.2305  | 21.9975 | -12.1156 | 10.0447 | -12.0868 | 1.7311  | 0.3403           | -0.0424           |
| 6.200000 | 127.190000 | 14.590000  | 194.160000  | 44.420000  | 183.290000 | -20.8132 | 39.9852 | -18.7955 | 13.5016 | -20.5642 | 2.8706  | -3.8154          | -0.2240           |
| 6.600000 | 137.780000 | 264.510000 | 305.030000  | 60.850000  | 180.400000 | -10.1509 | 30.8993 | -15.9082 | 13.3669 | -14.9887 | 2.3845  | 5.6030           | -0.0613           |
| 4.277238 | 24.861953  | 7.634262   | 307.756907  | 26.985729  | 269.678763 | -6.7588  | 28.2425 | -15.0520 | 11.2727 | -20.7497 | 2.2623  | -0.7830          | -0.2284           |
| 4.469263 | 24.493517  | 345.875399 | 113.488051  | 29.664199  | 92.183096  | -6.1499  | 19.9514 | -10.4376 | 7.6703  | -16.1328 | 1.5918  | -3.5068          | -0.0250           |
| 4.502247 | 128.654191 | 182.060984 | -94.256880  | 159.965365 | 197.964614 | -6.6837  | 24.3308 | -12.2192 | 9.1083  | -17.6631 | 1.8576  | -1.2693          | 0.0428            |
| 4.510256 | 148.709164 | 284.610333 | 204.405806  | 164.750523 | 190.272117 | -4.8676  | 17.5822 | -9.2718  | 6.5105  | -15.8580 | 1.4795  | -4.4251          | -0.0208           |
| 5.000000 | 106.160000 | 15.550000  | 112.510000  | 170.160000 | 162.290000 | -20.9309 | 45.9916 | -24.0895 | 20.1215 | -23.1756 | 3.3408  | 1.2580           | 0.0524            |
| 6.050000 | 136.799671 | 8.656403   | -157.229135 | 43.200329  | 188.656403 | -15.3325 | 30.0427 | -14.4212 | 9.7182  | -18.3856 | 2.2640  | -6.1144          | -0.0253           |
| 4.581893 | 134.939491 | 184.345352 | -88.200698  | 155.442544 | 196.158578 | -5.8622  | 17.9881 | -8.9538  | 6.3986  | -14.8948 | 1.4047  | -3.9194          | -0.0544           |
| 4.900000 | 5.130000   | 304.560000 | 82.210000   | 63.120000  | 12.720000  | -9.0471  | 30.3394 | -18.2187 | 14.7891 | -16.6244 | 2.1742  | 3.4124           | 0.1667            |
| 5.000000 | 121.510000 | 164.710000 | 20.620000   | 173.530000 | 352.070000 | -11.4352 | 33.0759 | -19.9251 | 16.3444 | -17.5973 | 2.4393  | 2.9020           | -0.1275           |
| 5.865379 | 112.105706 | 66.603606  | 175.732821  | 74.978382  | 113.128469 | -9.1656  | 57.8237 | -25.1411 | 15.5818 | -21.2781 | 2.4851  | 20.3059          | -0.0409           |
| 5.888356 | 99.976488  | 287.844801 | 225.666365  | 68.102473  | 105.398861 | -8.7472  | 47.8152 | -20.2782 | 13.0780 | -19.2765 | 2.2924  | 14.8837          | 0.0429            |
| 6.300000 | 96.000000  | 111.410000 | 142.520000  | 48.190000  | 324.960000 | -6.5505  | 20.4726 | -12.2691 | 9.5739  | -11.4778 | 1.5262  | 1.2754           | 0.2154            |
| 6.450000 | 113.090000 | 171.170000 | 195.850000  | 85.860000  | 295.500000 | -8.4835  | 24.5980 | -13.5960 | 10.7623 | -12.3229 | 1.7316  | 2.6894           | 0.1374            |
| 6.580455 | 130.376280 | 350.770323 | 180.000000  | 49.623720  | 189.229676 | -12.3326 | 13.9335 | -7.2762  | 4.3038  | -11.6810 | 1.1526  | -11.9000         | 0.1007            |
| 6.600000 | 90.940000  | 126.290000 | 143.220000  | 59.650000  | 4.640000   | -5.6181  | 18.0453 | -10.7029 | 8.3578  | -10.2215 | 1.3508  | 1.2114           | -0.4922           |
| 6.100000 | 103.700000 | 153.620000 | 223.940000  | 85.140000  | 102.140000 | -12.4015 | 36.6578 | -16.8889 | 13.5647 | -16.2719 | 2.3370  | 6.9972           | 0.2288            |
| 6.300000 | 105.780000 | 160.260000 | 101.950000  | 57.150000  | 247.450000 | -6.3273  | 21.7085 | -8.3283  | 5.3808  | -11.6312 | 1.3190  | 2.1215           | 0.0662            |
| 6.400000 | 103.920000 | 80.290000  | 128.930000  | 72.750000  | 16.910000  | -4.1573  | 15.3491 | -5.8695  | 3.7199  | -9.5642  | 0.9645  | 0.4424           | 0.2655            |
| 6.500000 | 117.110000 | 67.620000  | 105.830000  | 69.300000  | 0.080000   | -4.9428  | 19.2528 | -6.9493  | 4.3805  | -9.6768  | 1.0988  | 3.1632           | -0.0073           |
| 6.200000 | 104.550000 | 198.240000 | 168.280000  | 68.080000  | 261.830000 | -8.4146  | 28.0465 | -10.3417 | 6.7369  | -13.0302 | 1.4917  | 4.4886           | 0.2378            |
| 6.200000 | 114.340000 | 280.560000 | 215.290000  | 79.360000  | 8.130000   | -9.1663  | 30.2718 | -11.6766 | 7.8093  | -13.8445 | 1.6884  | 5.0821           | 0.8810            |
| 6.500000 | 149.910000 | 238.640000 | 318.470000  | 36.570000  | 50.690000  | 5.1826   | 3.1937  | -2.1081  | 0.6366  | -4.4350  | 0.2500  | 2.7198           | 0.3165            |
| 6.100000 | 107.480000 | 295.380000 | 170.400000  | 72.320000  | 346.080000 | -13.3812 | 42.3758 | -16.0033 | 10.8637 | -17.3249 | 2.2554  | 8.7854           | 0.8729            |
| 7.350000 | 149.910000 | 238.640000 | 318.470000  | 36.570000  | 50.690000  | 4.0399   | 0.2506  | -0.5978  | 0.0385  | -1.4106  | 0.0232  | 2.3438           | 0.2004            |
| 4.399907 | 40.097786  | 71.953879  | 79.882152   | 139.902214 | 251.953879 | -7.0522  | 14.1944 | -6.1849  | 5.0073  | -14.2912 | 1.1974  | -7.1293          | 0.1346            |
| 4.481891 | 39.150300  | 76.777818  | 176.144052  | 151.284708 | 86.249074  | -6.6066  | 12.2331 | -6.0315  | 4.8587  | -13.4079 | 1.0763  | -7.8780          | 0.0190            |
| 4.814895 | 66.136428  | 342.773715 | 130.891917  | 131.920187 | 251.202565 | -5.9413  | 11.6303 | -5.2098  | 4.1773  | -12.5323 | 1.0088  | -6.8670          | -0.0032           |
| 5.208866 | 78.521749  | 213.367328 | 233.672623  | 165.416188 | 206.537259 | -5.4112  | 9.8664  | -5.2553  | 3.8575  | -10.9905 | 0.8825  | -7.0506          | -0.1007           |
| 5.247530 | 60.715083  | 155.495999 | 74.613323   | 159.721228 | 170.192013 | -5.3858  | 10.5877 | -5.0647  | 3.7656  | -10.5578 | 0.8922  | -5.7628          | 0.0527            |
| 5.281170 | 30.752639  | 348.579652 | 66.058744   | 114.955562 | 42.378530  | -5.9736  | 11.2134 | -5.6396  | 4.1454  | -11.2666 | 0.9698  | -6.5512          | -0.2301           |
| 5.441825 | 35.534021  | 320.732740 | 61.988023   | 63.666380  | 158.545512 | -6.2229  | 9.9379  | -5.4550  | 3.4074  | -11.0661 | 0.8918  | -8.5070          | -0.0482           |
| 5.488136 | 5.305814   | 270.209853 | 41.216208   | 69.385609  | 206.415870 | -7.7744  | 10.9609 | -5.9794  | 4.0815  | -11.1071 | 0.9523  | -8.8661          | -0.1366           |
| 6.209654 | 166.607253 | 166.946562 | 41.392662   | 117.605193 | 223.630258 | -4.1063  | 4.0965  | -2.0576  | 0.8698  | -5.2941  | 0.3347  | -6.1570          | 0.0071            |
| 6.266765 | 150.662991 | 217.091902 | 107.025295  | 122.962197 | 125.489116 | -4.2419  | 4.9353  | -2.3360  | 1.0641  | -5.3529  | 0.3902  | -5.5410          | 0.1276            |
| 6.268666 | 169.370803 | 310.382847 | 302.121408  | 143.923402 | 354.018232 | -5.8154  | 6.5110  | -3.2320  | 1.5693  | -7.0555  | 0.5404  | -7.4821          | -0.0525           |
| 6.285717 | 148.808225 | 117.408319 | -0.915970   | 118.060218 | 212.141081 | -4.9495  | 4.9494  | -2.5453  | 1.2802  | -5.3683  | 0.4188  | -6.2148          | -0.0333           |
| 6.287320 | 23.082859  | 212.108500 | 337.961293  | 31.194751  | 334.848031 | -5.3438  | 5.1173  | -2.5703  | 1.3023  | -5.3130  | 0.4194  | -6.3880          | 0.0106            |
| 6.388970 | 65.462769  | 312.018685 | -162.105829 | 17.545040  | 4.573279   | -3.3713  | 3.7554  | -1.8021  | 0.7117  | -4.9877  | 0.3087  | -5.3854          | -0.1661           |
| 6.400400 | 143.822371 | 34.071087  | -177.874898 | 103.356355 | 115.611020 | -8.1726  | 7.6629  | -3.5878  | 1.9641  | -7.8565  | 0.6191  | -9.3708          | -0.0258           |
| 6.492332 | 92.890758  | 62.498128  | 142.714150  | 66.151295  | 298.298884 | -5.2071  | 5.6334  | -2.4227  | 1.3617  | -6.6857  | 0.4696  | -6.8509          | 0.0458            |
| 6.584468 | 129.935372 | 350.507137 | 180.000000  | 50.064628  | 189.492862 | -12.5658 | 14.2761 | -7.5020  | 4.4976  | -11.8880 | 1.1903  | -11.9918         | 0.0472            |
| 6.585643 | 95.736457  | 298.651646 | 180.780273  | 70.390573  | 281.462264 | -5.1757  | 5.8216  | -2.5991  | 1.5135  | -6.5356  | 0.4835  | -6.4918          | 0.0744            |
| 6.677779 | 141.129653 | 22.073334  | 164.189569  | 111.547280 | 346.732999 | -10.1005 | 10.3360 | -4.9853  | 2.7973  | -8.7296  | 0.7825  | -9.8996          | 0.0045            |
| 6.784775 | 133.996114 | 3.829291   | -165.547531 | 95.233957  | 84.240092  | -8.2158  | 7.4530  | -4.3389  | 2.6600  | -7.9992  | 0.6843  | -9.7565          | -0.0711           |
| 7.259683 | 87.840032  | 359.554723 | -6.535153   | 8.227483   | 320.894993 | -6.3918  | 5.6745  | -2.9559  | 1.6615  | -5.1757  | 0.5098  | -6.6777          | 0.1095            |
| 4.428679 | 39.524058  | 72.747319  | 82.791089   | 140.475942 | 252.747319 | -6.3593  | 12.7328 | -5.6180  | 4.5030  | -13.6048 | 1.0933  | -7.2530          | 0.0062            |
| 4.497562 | 37.727629  | 79.026440  | 175.144650  | 150.189120 | 85.419659  | -6.9298  | 12.5998 | -6.2287  | 5.0310  | -13.5425 | 1.1037  | -7.9665          | -0.0130           |
| 4.744644 | 65.363935  | 340.462325 | 182.208854  | 114.636065 | 160.462325 | -4.4973  | 12.3426 | -4.9671  | 3.9964  | -13.2580 | 1.0314  | -5.3521          | -0.2912           |
| 4.799179 | 19.704540  | 357.280254 | 115.678483  | 50.969151  | 42.570085  | -4.5865  | 9.5790  | -4.9702  | 3.3538  | -11.0507 | 0.8208  | -6.8537          | 0.0235            |
| 4.892441 | 69.916757  | 340.397792 | 129.490027  | 135.132771 | 248.854137 | -5.4920  | 10.6642 | -4.7876  | 3.7955  | -11.9493 | 0.9347  | -6.8345          | 0.0838            |
| 4.903244 | 129.814542 | 141.894181 | 101.911145  | 146.480449 | 171.580822 | -4.2427  | 8.2273  | -4.2481  | 2.7893  | -10.3290 | 0.7159  | -7.0872          | 0.0946            |

continued on next page

| $R$      | $\beta_A$  | $\gamma_A$ | $\alpha_B$  | $\beta_B$  | $\gamma_B$ | elst     | exch    | ind     | ex-ind | disp     | ex-disp | $E_{\text{int}}$ | $E_{\text{diff}}$ |
|----------|------------|------------|-------------|------------|------------|----------|---------|---------|--------|----------|---------|------------------|-------------------|
| 4.942362 | 158.240697 | 360.000000 | 360.000000  | 146.089985 | 180.000000 | -2.4873  | 7.8035  | -4.3398 | 2.5777 | -9.9055  | 0.6861  | -5.6652          | 0.0940            |
| 5.068507 | 28.530552  | 360.000000 | 0.000000    | 13.986751  | 360.000000 | -1.4136  | 3.3726  | -1.9973 | 0.9149 | -6.6495  | 0.3145  | -5.4583          | -0.1149           |
| 5.081126 | 146.989930 | 71.047128  | 115.866187  | 174.329513 | 131.547750 | -3.4180  | 7.4573  | -4.3206 | 2.4685 | -9.2932  | 0.6559  | -6.4500          | -0.0640           |
| 5.084747 | 135.404977 | 110.732867 | 109.129565  | 169.555610 | 190.542531 | -4.1955  | 6.5816  | -3.7412 | 2.5441 | -8.3753  | 0.5899  | -6.5964          | -0.0365           |
| 5.222068 | 76.446145  | 98.813002  | 70.791814   | 151.757125 | 152.605735 | -3.8347  | 8.9317  | -4.3248 | 3.2325 | -10.2422 | 0.8087  | -5.4288          | 0.1915            |
| 5.254453 | 23.327939  | 25.000951  | 251.958135  | 107.779269 | 320.858380 | -5.1513  | 11.4791 | -5.4072 | 4.0724 | -11.2927 | 0.9788  | -5.3210          | 0.3342            |
| 5.258662 | 123.846590 | 18.942437  | 12.185042   | 135.581232 | 162.576502 | -6.7763  | 13.2474 | -6.4765 | 4.1227 | -12.9508 | 1.0988  | -7.7346          | -0.0026           |
| 5.401512 | 75.862995  | 269.279168 | 18.040926   | 138.110379 | 170.632756 | -4.1002  | 7.6982  | -3.7899 | 2.7335 | -9.3709  | 0.6981  | -6.1313          | 0.0831            |
| 5.977780 | 50.159263  | 312.676286 | 65.510519   | 33.749807  | 313.393866 | -4.5408  | 5.2132  | -2.4865 | 1.2546 | -5.6690  | 0.4203  | -5.8081          | 0.0290            |
| 6.191050 | 150.309072 | 222.222432 | 103.173020  | 127.171029 | 127.501718 | -4.1462  | 4.5004  | -2.1927 | 0.9808 | -5.1416  | 0.3609  | -5.6383          | 0.0260            |
| 6.398072 | 152.842550 | 250.225439 | 81.087170   | 106.467179 | 228.233888 | -4.1305  | 5.0311  | -2.4347 | 1.0949 | -5.7008  | 0.4094  | -5.7305          | 0.0656            |
| 6.431654 | 79.666068  | 293.720449 | -175.496434 | 37.134619  | 211.626496 | -8.3282  | 7.8337  | -3.7623 | 2.0525 | -7.9146  | 0.6307  | -9.4882          | -0.1000           |
| 6.529164 | 94.151313  | 58.969413  | 128.588924  | 67.689859  | 327.385670 | -5.7402  | 7.0588  | -2.9228 | 1.7285 | -7.0991  | 0.5671  | -6.4077          | 0.1226            |
| 6.606095 | 33.738122  | 253.583784 | -76.130832  | 6.731418   | 280.158928 | -4.6966  | 4.2752  | -2.2128 | 1.1823 | -4.5601  | 0.3814  | -5.6306          | -0.0167           |
| 6.712587 | 143.657059 | 340.921092 | -159.945787 | 116.280629 | 12.127268  | -8.8676  | 7.7912  | -3.7577 | 1.9209 | -7.7888  | 0.6144  | -10.0876         | 0.0062            |
| 6.761273 | 74.712785  | 183.185462 | 169.994292  | 73.315231  | 283.511309 | -5.9313  | 6.5836  | -2.9053 | 1.7361 | -6.5746  | 0.5204  | -6.5711          | 0.0668            |
| 6.947793 | 79.172367  | 180.000000 | -180.000000 | 100.827633 | 360.000000 | -6.0228  | 5.6770  | -2.2430 | 1.2266 | -6.4279  | 0.4611  | -7.3290          | 0.0126            |
| 7.272000 | 86.737463  | 1.376955   | -34.677166  | 8.560057   | 323.842517 | -6.2976  | 5.3117  | -2.7759 | 1.5284 | -4.9574  | 0.4780  | -6.7128          | 0.0479            |
| 5.086736 | 36.002069  | 5.676676   | 316.051942  | 64.794816  | 285.038875 | -4.1337  | 7.3406  | -3.5939 | 2.3130 | -9.3178  | 0.6196  | -6.7723          | 0.0594            |
| 5.098330 | 38.481777  | 6.207417   | -17.982288  | 73.063419  | 41.053996  | -5.5899  | 9.7633  | -4.5428 | 3.0035 | -10.5078 | 0.7758  | -7.0979          | 0.0571            |
| 5.960669 | 73.082679  | 39.984861  | -158.537182 | 106.917323 | 219.984861 | -3.1459  | 4.5590  | -1.6593 | 1.2630 | -6.3592  | 0.3934  | -4.9490          | -0.3382           |
| 6.436889 | 143.011151 | 159.113676 | -35.792945  | 114.281828 | 145.338257 | -5.0119  | 5.1635  | -2.5388 | 1.2215 | -5.3546  | 0.4202  | -6.1000          | -0.0234           |
| 6.453812 | 67.304101  | 321.460030 | -62.354320  | 18.349405  | 248.782646 | -4.4679  | 4.6029  | -2.3319 | 1.0545 | -5.0707  | 0.3770  | -5.8361          | 0.0371            |
| 6.548687 | 118.411560 | 247.545378 | 164.273656  | 84.169583  | 242.272904 | -4.7747  | 4.7258  | -2.1178 | 1.0977 | -6.0422  | 0.4032  | -6.7079          | -0.0457           |
| 6.669230 | 101.376351 | 208.886498 | -150.974806 | 93.196916  | 122.813222 | -6.5998  | 7.4585  | -2.9558 | 1.8277 | -6.9272  | 0.5641  | -6.6327          | 0.0717            |
| 5.530622 | 121.922261 | 137.793463 | 79.024823   | 176.312972 | 28.033458  | -4.6299  | 5.4052  | -2.7267 | 1.6772 | -7.0711  | 0.4710  | -6.8743          | -0.0869           |
| 6.046662 | 157.173436 | 5.351554   | -135.622302 | 92.264489  | 5.112475   | -6.4418  | 18.4592 | -8.6992 | 5.1317 | -13.3685 | 1.3933  | -3.5251          | -0.0025           |
| 5.856781 | 110.359467 | 26.949855  | -24.252261  | 131.369101 | 177.621249 | -5.6310  | 7.7781  | -4.0807 | 2.7745 | -8.5204  | 0.6784  | -7.0012          | 0.0809            |
| 6.493967 | 94.108530  | 62.669780  | 152.903451  | 41.195802  | 182.512270 | -7.6787  | 10.7741 | -5.4289 | 3.4115 | -9.3946  | 0.8831  | -7.4335          | 0.0363            |
| 6.776895 | 135.778424 | 180.000000 | -180.000000 | 50.814186  | 180.000000 | -3.1517  | 9.4730  | -6.2322 | 4.0872 | -7.6647  | 0.8163  | -2.6722          | 0.0629            |
| 4.445597 | 39.771474  | 72.280409  | 81.903855   | 140.228526 | 252.280409 | -6.2215  | 12.3107 | -5.4090 | 4.3219 | -13.3489 | 1.0587  | -7.2880          | -0.0316           |
| 4.502391 | 37.446181  | 79.090209  | 174.741296  | 150.084302 | 85.295755  | -6.8683  | 12.4386 | -6.1426 | 4.9571 | -13.4483 | 1.0900  | -7.9735          | -0.0137           |
| 4.816902 | 20.357977  | 4.274373   | 245.130594  | 51.763087  | 313.972926 | -4.3551  | 9.0824  | -4.6340 | 3.0488 | -10.7542 | 0.7753  | -6.8368          | 0.1266            |
| 4.818101 | 46.008892  | 288.909556 | -133.066218 | 113.700945 | 196.456180 | -5.1161  | 10.2382 | -4.5761 | 3.6048 | -11.9191 | 0.9026  | -6.8656          | 0.0090            |
| 4.841853 | 128.261897 | 214.331541 | 10.238215   | 146.459837 | 168.380104 | -4.8738  | 11.4269 | -6.0666 | 4.1623 | -11.5221 | 0.9522  | -5.9211          | 0.1310            |
| 4.945568 | 27.308829  | 341.074054 | 65.153560   | 20.798693  | 235.346787 | -2.1092  | 6.3740  | -3.6276 | 1.9105 | -8.9104  | 0.5448  | -5.8178          | -0.0444           |
| 4.966594 | 33.941839  | 360.000000 | 0.000000    | 18.875078  | 180.000000 | -2.4613  | 7.0892  | -3.9346 | 2.2560 | -9.3316  | 0.6196  | -5.7627          | 0.0631            |
| 5.055311 | 36.014120  | 354.524863 | 44.195646   | 64.839625  | 73.716377  | -4.4523  | 8.1070  | -3.9167 | 2.5712 | -9.7862  | 0.6761  | -6.8009          | 0.0831            |
| 5.059847 | 31.226745  | 360.000000 | 0.000000    | 9.701299   | 359.999999 | -1.5323  | 3.7949  | -2.1689 | 1.0255 | -6.9801  | 0.3456  | -5.5154          | -0.0269           |
| 5.100000 | 37.446181  | 79.090209  | 174.741296  | 150.084302 | 85.295755  | -2.6308  | 3.6996  | -1.9071 | 1.4108 | -6.8843  | 0.3597  | -5.9521          | -0.0779           |
| 5.107877 | 5.258310   | 311.005896 | 109.422765  | 32.672971  | 253.701231 | -3.2871  | 6.8647  | -4.0333 | 2.2519 | -8.8625  | 0.6073  | -6.4589          | -0.0629           |
| 5.125267 | 107.180688 | 219.510182 | -22.110178  | 140.341855 | 184.601151 | -5.6800  | 9.5516  | -4.5647 | 3.0578 | -10.4203 | 0.7764  | -7.2792          | -0.0841           |
| 5.226965 | 89.662669  | 183.814614 | 47.776629   | 147.871363 | 164.623410 | -1.7127  | 6.4507  | -3.0016 | 1.7443 | -9.0579  | 0.5510  | -5.0263          | -0.1208           |
| 5.235447 | 72.338870  | 274.110703 | 341.691844  | 143.670694 | 169.437661 | -4.8040  | 8.4031  | -4.1084 | 2.9772 | -9.4859  | 0.7221  | -6.2960          | -0.1163           |
| 5.264198 | 62.944499  | 205.309589 | 279.192612  | 158.733676 | 191.047534 | -5.2236  | 10.1255 | -5.0029 | 3.7465 | -10.4633 | 0.8762  | -5.9417          | -0.0217           |
| 5.271311 | 79.383438  | 331.869244 | 174.659304  | 125.711855 | 157.132449 | -3.8644  | 7.3274  | -3.1357 | 2.3506 | -9.2576  | 0.6483  | -5.9314          | -0.0425           |
| 5.348875 | 69.681759  | 330.780628 | 172.096353  | 110.318241 | 150.780628 | -3.8714  | 7.2734  | -2.8463 | 2.2125 | -9.2713  | 0.6336  | -5.8695          | 0.1043            |
| 5.361485 | 76.559302  | 269.937851 | 15.123400   | 138.445506 | 172.468145 | -4.4764  | 8.4940  | -4.1291 | 3.0268 | -9.6983  | 0.7518  | -6.0313          | 0.2216            |
| 5.444429 | 121.902956 | 22.658479  | 8.191305    | 135.757971 | 159.390861 | -5.0647  | 8.4409  | -4.2231 | 2.3608 | -10.1801 | 0.7221  | -7.9441          | 0.0237            |
| 5.474345 | 111.804606 | 334.680861 | -65.652136  | 170.417403 | 241.936779 | -7.2591  | 9.8355  | -5.5098 | 3.7551 | -10.6378 | 0.8783  | -8.9377          | -0.0153           |
| 5.530622 | 121.922261 | 137.793463 | 79.024823   | 176.312972 | 28.033458  | -4.6299  | 5.4052  | -2.7267 | 1.6772 | -7.0711  | 0.4710  | -6.8743          | -0.0869           |
| 5.856781 | 110.359467 | 26.949855  | -24.252261  | 131.369101 | 177.621249 | -5.6310  | 7.7781  | -4.0807 | 2.7745 | -8.5204  | 0.6784  | -7.0012          | 0.0809            |
| 5.956585 | 165.798029 | 52.194499  | 18.020968   | 121.574548 | 227.739586 | -4.3357  | 5.4733  | -2.8026 | 1.2821 | -6.7375  | 0.4559  | -6.6647          | -0.2323           |
| 6.008884 | 144.310764 | 239.977113 | 8.716678    | 124.337073 | 154.220496 | -4.9912  | 5.5609  | -2.8995 | 1.5991 | -5.9839  | 0.4755  | -6.2392          | -0.0341           |
| 6.046662 | 157.173436 | 5.351554   | -135.622302 | 92.264489  | 5.112475   | -6.4418  | 18.4592 | -8.6992 | 5.1317 | -13.3685 | 1.3933  | -3.5251          | -0.0025           |
| 6.167647 | 58.760652  | 28.152772  | 26.321803   | 39.650124  | 33.254600  | -5.0113  | 5.5044  | -2.7951 | 1.4669 | -5.7926  | 0.4587  | -6.1690          | 0.0347            |
| 6.254347 | 173.297786 | 176.598319 | 38.579978   | 114.732110 | 223.751047 | -4.0468  | 4.0279  | -2.0659 | 0.8354 | -5.3948  | 0.3332  | -6.3110          | 0.0294            |
| 6.280549 | 98.985525  | 118.382239 | 164.055788  | 81.014475  | 298.382239 | -10.2572 | 13.0314 | -8.4307 | 7.1822 | -11.1509 | 1.2048  | -8.4204          | -0.0089           |
| 6.299588 | 152.401191 | 224.586277 | 357.354184  | 154.751566 | 25.834751  | -5.6632  | 5.6421  | -2.7633 | 1.4502 | -5.5529  | 0.4617  | -6.4254          | 0.0772            |
| 6.325879 | 57.206847  | 305.215713 | 105.036206  | 28.859921  | 35.106796  | -4.1434  | 4.4568  | -2.1474 | 0.9361 | -5.0184  | 0.3528  | -5.5636          | 0.1307            |
| 6.402532 | 139.867954 | 357.729577 | 175.037383  | 77.560301  | 300.006801 | -7.6611  | 8.3742  | -4.9933 | 3.2262 | -8.8292  | 0.7438  | -9.1394          | -0.0371           |
| 6.414519 | 143.988637 | 25.639247  | 184.213036  | 98.949210  | 114.510999 | -8.3504  | 8.3618  | -3.9084 | 2.1354 | -8.1166  | 0.6533  | -9.2248          | 0.0772            |
| 6.423364 | 67.999494  | 319.244530 | -69.061413  | 21.014201  | 264.225149 | -4.5146  | 4.7811  | -2.3800 | 1.0826 | -5.2280  | 0.3867  | -5.8722          | 0.0205            |
| 6.450654 | 72.896004  | 46.051020  | 80.512796   | 24.394988  | 78.407953  | -4.3745  | 4.9297  | -2.4005 | 1.0711 | -5.4491  | 0.3956  | -5.8277          | 0.0511            |
| 6.493967 | 94.108530  | 62.669780  | 152.903451  | 41.195802  | 182.512270 | -7.6787  | 10.7741 | -5.4289 | 3.4115 | -9.3946  | 0.8831  | -7.4335          | 0.0363            |
| 6.509398 | 119.657143 | 245.902798 | 163.407504  | 80.560905  | 244.741982 | -4.9999  | 5.2690  | -2.3457 | 1.2036 | -6.2965  | 0.4354  | -6.7341          | 0.0182            |

continued on next page

| $R$      | $\beta_A$  | $\gamma_A$ | $\alpha_B$  | $\beta_B$  | $\gamma_B$ | elst     | exch    | ind      | ex-ind  | disp     | ex-disp | $E_{\text{int}}$ | $E_{\text{diff}}$ |
|----------|------------|------------|-------------|------------|------------|----------|---------|----------|---------|----------|---------|------------------|-------------------|
| 6.687147 | 134.400884 | 357.494522 | 165.865399  | 92.526278  | 274.951441 | -8.6724  | 8.7240  | -4.8355  | 3.0105  | -8.6494  | 0.7746  | -9.6481          | -0.0276           |
| 6.690353 | 129.152540 | 10.640294  | 180.000000  | 50.847460  | 169.359705 | -11.3776 | 11.0025 | -6.2427  | 3.5683  | -10.4798 | 0.9691  | -12.5601         | -0.0880           |
| 6.714031 | 143.253224 | 19.895140  | 161.202497  | 115.821021 | 346.318559 | -9.1901  | 8.2226  | -4.0001  | 2.1075  | -7.9683  | 0.6504  | -10.1780         | -0.0131           |
| 6.745616 | 87.054991  | 301.831069 | 205.883339  | 80.014138  | 29.108185  | -6.1269  | 6.1824  | -2.4667  | 1.4248  | -6.3146  | 0.4713  | -6.8296          | -0.0543           |
| 6.776895 | 135.778424 | 180.000000 | -180.000000 | 50.814186  | 180.000000 | -3.1517  | 9.4730  | -6.2322  | 4.0872  | -7.6647  | 0.8163  | -2.6722          | 0.0629            |
| 6.935037 | 79.507161  | 180.000000 | 180.000000  | 100.492839 | 360.000000 | -6.0619  | 5.7551  | -2.2738  | 1.2289  | -6.4973  | 0.4664  | -7.3825          | -0.0359           |
| 7.196759 | 142.823058 | 144.182080 | 154.544386  | 131.458603 | 57.133829  | -4.9237  | 3.9749  | -1.8142  | 1.0195  | -4.1376  | 0.3497  | -5.5315          | 0.0713            |
| 7.235565 | 86.077306  | 359.450062 | 30.386685   | 9.058081   | 45.432098  | -6.3540  | 5.5422  | -2.8849  | 1.6107  | -5.1020  | 0.4975  | -6.6905          | 0.1089            |
| 3.800000 | 37.446181  | 79.090209  | 174.741296  | 150.084302 | 85.295755  | -29.5564 | 71.5316 | -35.9406 | 32.5078 | -33.4108 | 4.9544  | 10.0859          | 1.7152            |
| 3.950000 | 37.446181  | 79.090209  | 174.741296  | 150.084302 | 85.295755  | -20.7359 | 48.0041 | -23.7717 | 21.1429 | -27.1685 | 3.5460  | 1.0169           | 0.6828            |
| 4.200000 | 37.446181  | 79.090209  | 174.741296  | 150.084302 | 85.295755  | -12.0881 | 25.3643 | -12.4301 | 10.6190 | -19.5364 | 2.0493  | -6.0220          | 0.0850            |
| 5.100000 | 37.446181  | 79.090209  | 174.741296  | 150.084302 | 85.295755  | -2.6308  | 3.6996  | -1.9071  | 1.4108  | -6.8843  | 0.3597  | -5.9521          | -0.0779           |
| 6.000000 | 37.446181  | 79.090209  | 174.741296  | 150.084302 | 85.295755  | -0.3073  | 0.7188  | -0.3964  | 0.2356  | -2.7227  | 0.0778  | -2.3942          | -0.1976           |
| 6.070000 | 129.152540 | 10.640294  | 180.000000  | 50.847460  | 169.359705 | -34.8839 | 73.8640 | -34.9220 | 28.0906 | -28.9675 | 4.9445  | 8.1257           | 0.5076            |
| 6.150000 | 129.152540 | 10.640294  | 180.000000  | 50.847460  | 169.359705 | -29.0771 | 57.7624 | -27.4500 | 21.5440 | -25.2885 | 4.0366  | 1.5274           | 0.3814            |
| 6.350000 | 129.152540 | 10.640294  | 180.000000  | 50.847460  | 169.359705 | -19.3431 | 31.2395 | -15.3755 | 11.0652 | -18.1079 | 2.4033  | -8.1185          | 0.0393            |
| 7.100000 | 129.152540 | 10.640294  | 180.000000  | 50.847460  | 169.359705 | -7.4532  | 3.1549  | -2.4727  | 0.9475  | -5.6506  | 0.3178  | -11.1564         | 0.0278            |
| 8.000000 | 129.152540 | 10.640294  | 180.000000  | 50.847460  | 169.359705 | -4.1643  | 0.2112  | -0.5332  | 0.0604  | -1.7070  | 0.0270  | -6.1060          | 0.1704            |
| 6.080000 | 143.253224 | 19.895140  | 161.202497  | 115.821021 | 346.318559 | -29.7324 | 61.4181 | -27.5752 | 21.1623 | -22.8591 | 3.6218  | 6.0354           | -0.7702           |
| 6.150000 | 143.253224 | 19.895140  | 161.202497  | 115.821021 | 346.318559 | -25.3381 | 49.3565 | -22.0073 | 16.5542 | -20.2740 | 3.0305  | 1.3218           | -0.3844           |
| 6.250000 | 143.253224 | 19.895140  | 161.202497  | 115.821021 | 346.318559 | -20.4068 | 36.0615 | -16.0115 | 11.6054 | -17.1015 | 2.3357  | -3.5171          | -0.1066           |
| 6.450000 | 143.253224 | 19.895140  | 161.202497  | 115.821021 | 346.318559 | -13.8686 | 19.1507 | -8.6230  | 5.6203  | -12.2334 | 1.3632  | -8.5909          | 0.0167            |
| 7.200000 | 143.253224 | 19.895140  | 161.202497  | 115.821021 | 346.318559 | -5.4587  | 1.6942  | -1.2095  | 0.3454  | -3.8089  | 0.1578  | -8.2799          | 0.0256            |
| 8.300000 | 143.253224 | 19.895140  | 161.202497  | 115.821021 | 346.318559 | -2.7262  | 0.0468  | -0.2152  | 0.0079  | -0.9387  | 0.0060  | -3.8194          | 0.0177            |
| 4.527141 | 36.771591  | 279.379780 | 184.117309  | 149.422221 | 272.897692 | -6.7208  | 11.9562 | -5.9150  | 4.7587  | -13.1278 | 1.0520  | -7.9968          | -0.0274           |
| 4.573668 | 44.009625  | 68.014056  | 67.649932   | 135.990375 | 248.014056 | -7.5872  | 13.6749 | -5.6850  | 4.6297  | -13.3351 | 1.1341  | -7.1685          | 0.0756            |
| 4.814518 | 28.000359  | 353.937170 | 128.731853  | 45.930259  | 63.838565  | -3.9511  | 8.1498  | -4.2951  | 2.7346  | -10.4405 | 0.7066  | -7.0958          | -0.0478           |
| 4.817325 | 47.729377  | 289.177698 | 229.305075  | 113.554890 | 197.482039 | -5.8588  | 11.4651 | -5.1223  | 4.0979  | -12.4657 | 0.9960  | -6.8878          | -0.0099           |
| 4.857616 | 123.388098 | 228.642765 | 8.429943    | 150.599766 | 175.329007 | -4.5558  | 9.0755  | -4.3111  | 2.6997  | -10.5914 | 0.7403  | -6.9427          | -0.1346           |
| 4.871368 | 29.188077  | 346.452328 | 65.448389   | 20.653380  | 243.254790 | -2.3567  | 7.4958  | -4.0411  | 2.2212  | -9.7653  | 0.6301  | -5.8159          | 0.0098            |
| 4.888206 | 128.223797 | 215.317196 | 255.023431  | 145.672742 | 186.385894 | -4.6863  | 9.2618  | -4.9044  | 3.4125  | -10.9546 | 0.8062  | -7.0647          | 0.0637            |
| 4.896177 | 18.132512  | 1.708179   | 244.474525  | 55.494339  | 316.254155 | -4.4560  | 8.3226  | -4.2698  | 2.8231  | -10.1171 | 0.7064  | -6.9908          | 0.0131            |
| 4.983347 | 17.041200  | 4.666378   | 101.797457  | 46.235010  | 297.461761 | -3.7602  | 6.4280  | -3.5171  | 2.3029  | -8.6296  | 0.5718  | -6.6043          | 0.0893            |
| 4.984202 | 34.414888  | 359.999993 | 0.000009    | 18.398645  | 179.999979 | -2.4890  | 6.8809  | -3.8442  | 2.1896  | -9.1510  | 0.6026  | -5.8112          | 0.0140            |
| 5.064491 | 99.226352  | 180.000000 | 180.000000  | 162.966369 | 180.000000 | -1.5274  | 6.9626  | -3.2687  | 1.9464  | -9.7402  | 0.6073  | -5.0199          | 0.0000            |
| 5.092886 | 37.207346  | 353.150804 | 44.811035   | 68.955780  | 73.766151  | -4.7025  | 8.0988  | -4.0550  | 2.7359  | -9.8050  | 0.6864  | -7.0413          | -0.1015           |
| 5.124961 | 104.209184 | 218.306035 | 337.581187  | 139.734344 | 185.672322 | -6.1255  | 10.2990 | -5.0403  | 3.4844  | -10.8564 | 0.8425  | -7.3963          | -0.1618           |
| 5.181500 | 12.154982  | 318.166904 | 125.583796  | 82.211933  | 321.567727 | -5.4968  | 8.7733  | -4.7437  | 3.5353  | -10.1139 | 0.7778  | -7.2679          | -0.0783           |
| 5.190514 | 29.313220  | 22.522112  | -83.033150  | 103.973668 | 85.431047  | -3.9466  | 8.6626  | -4.1618  | 3.0401  | -10.0373 | 0.7748  | -5.6682          | 0.0287            |
| 5.200365 | 14.157452  | 332.498414 | 125.650847  | 100.738542 | 328.260315 | -5.4241  | 10.0805 | -5.3384  | 3.9175  | -11.0906 | 0.8967  | -6.9586          | 0.0629            |
| 5.258819 | 91.631186  | 182.553791 | 49.990446   | 148.254451 | 165.333967 | -1.3807  | 5.6461  | -2.6313  | 1.4553  | -8.4580  | 0.4825  | -4.8860          | 0.0533            |
| 5.267264 | 3.411826   | 274.832065 | 33.701452   | 30.550509  | 274.392732 | -3.5238  | 5.6704  | -3.3588  | 1.9298  | -7.6220  | 0.5166  | -6.3877          | 0.1374            |
| 5.295136 | 69.594840  | 266.093250 | 312.052053  | 145.253718 | 186.790260 | -4.3547  | 7.8699  | -3.9668  | 2.7694  | -9.3949  | 0.7050  | -6.3721          | -0.2883           |
| 5.329287 | 70.528495  | 330.395539 | 171.825420  | 109.471505 | 150.395539 | -4.4965  | 8.5407  | -3.4102  | 2.6937  | -10.0332 | 0.7380  | -5.9675          | 0.0505            |
| 5.393244 | 120.535844 | 22.241566  | 8.545799    | 135.967881 | 161.138134 | -5.6525  | 9.9487  | -4.9556  | 2.9471  | -11.1283 | 0.8519  | -7.9887          | 0.0197            |
| 5.428132 | 115.469222 | 336.443822 | 61.941707   | 143.289688 | 142.310963 | -6.5030  | 10.4625 | -5.7508  | 3.6338  | -11.2898 | 0.9313  | -8.5160          | 0.0105            |
| 5.460950 | 111.388455 | 335.751136 | 292.762457  | 168.196550 | 238.379439 | -7.6197  | 10.6274 | -6.0063  | 4.2090  | -11.0604 | 0.9532  | -8.8968          | 0.0355            |
| 5.535227 | 68.547475  | 146.514343 | 12.362753   | 138.588437 | 179.730152 | -4.3904  | 7.9338  | -4.0690  | 2.9931  | -9.3962  | 0.7295  | -6.1992          | -0.0987           |
| 5.829211 | 135.638837 | 134.778235 | 151.158509  | 171.498197 | 2.689169   | -3.3484  | 3.9427  | -1.8426  | 1.1898  | -5.7530  | 0.3684  | -5.4430          | 0.1053            |
| 6.126488 | 52.323715  | 311.211316 | 104.724270  | 27.928595  | 50.262010  | -3.7927  | 4.0538  | -2.0260  | 0.8752  | -5.0297  | 0.3303  | -5.5891          | 0.0280            |
| 6.143376 | 57.503062  | 26.176149  | 25.142340   | 40.549695  | 35.004213  | -4.8664  | 5.1617  | -2.6752  | 1.3931  | -5.6587  | 0.4362  | -6.2093          | 0.0153            |
| 6.219993 | 167.895336 | 309.638151 | 300.872183  | 146.101954 | 353.134033 | -5.8109  | 6.6210  | -3.3468  | 1.6887  | -7.1658  | 0.5557  | -7.4581          | 0.0125            |
| 6.301046 | 100.464371 | 118.465474 | 169.958978  | 79.535629  | 298.465474 | -8.9293  | 10.5950 | -6.8729  | 5.7004  | -10.0959 | 1.0022  | -8.6006          | -0.0137           |
| 6.319038 | 149.992265 | 208.452106 | 21.877479   | 156.410979 | 324.971258 | -5.3851  | 5.0268  | -2.5325  | 1.2787  | -5.2148  | 0.4134  | -6.4135          | 0.0095            |
| 6.342661 | 100.107085 | 236.233479 | 180.000000  | 79.892915  | 303.766520 | -8.6009  | 9.6239  | -6.3546  | 5.2294  | -9.6133  | 0.9252  | -8.7903          | -0.0670           |
| 6.407793 | 144.088555 | 30.287892  | 179.936644  | 103.159984 | 115.536915 | -8.1878  | 7.6878  | -3.5762  | 1.9362  | -7.8488  | 0.6136  | -9.3751          | 0.0187            |
| 6.528069 | 114.733353 | 236.190593 | 217.513152  | 84.272220  | 114.990584 | -5.0188  | 4.7171  | -2.1488  | 1.1027  | -6.2018  | 0.4027  | -7.1469          | -0.1490           |
| 6.706144 | 62.730433  | 192.460709 | 200.904307  | 36.964720  | 160.519554 | -9.1698  | 8.3045  | -3.9805  | 2.1123  | -8.0461  | 0.6555  | -10.1241         | 0.0085            |
| 6.734357 | 133.427760 | 0.736022   | 165.469457  | 94.523915  | 279.100682 | -8.6244  | 8.6987  | -4.9763  | 3.2144  | -8.7352  | 0.7967  | -9.6261          | 0.0623            |
| 6.736926 | 129.258329 | 9.617589   | -180.000000 | 50.741671  | 170.382410 | -10.6741 | 9.5300  | -5.4753  | 2.9770  | -9.7296  | 0.8457  | -12.5264         | -0.0259           |
| 6.747964 | 75.691989  | 178.047710 | 164.964897  | 69.786156  | 306.656908 | -4.5242  | 4.1239  | -2.0485  | 1.0044  | -5.9875  | 0.3741  | -7.0578          | 0.0034            |
| 6.952162 | 79.295863  | 180.000000 | 180.000000  | 100.704137 | 360.000000 | -5.9691  | 5.5516  | -2.1987  | 1.1880  | -6.3651  | 0.4517  | -7.3417          | -0.0005           |
| 6.800000 | 126.580000 | 337.340000 | 186.180000  | 109.870000 | 7.630000   | -19.3582 | 35.8022 | -16.7836 | 12.2814 | -14.2404 | 2.0871  | -0.2115          | -0.3435           |
| 7.000000 | 106.450000 | 194.760000 | 244.710000  | 65.080000  | 220.570000 | -9.8443  | 27.4928 | -11.5610 | 8.2549  | -10.0820 | 1.4627  | 5.7232           | 0.5405            |
| 7.250000 | 109.020000 | 182.270000 | 91.980000   | 84.260000  | 141.520000 | -7.2011  | 22.2388 | -9.0474  | 6.4297  | -8.4756  | 1.2107  | 5.1551           | 0.3764            |
| 7.400000 | 97.000000  | 336.350000 | 189.780000  | 85.820000  | 6.280000   | -12.4630 | 27.4315 | -11.5454 | 8.8758  | -9.9411  | 1.5630  | 3.9207           | 1.2377            |

continued on next page

| $R$      | $\beta_A$  | $\gamma_A$ | $\alpha_B$ | $\beta_B$  | $\gamma_B$ | elst     | exch     | ind       | ex-ind   | disp     | ex-disp | $E_{\text{int}}$ | $E_{\text{diff}}$ |
|----------|------------|------------|------------|------------|------------|----------|----------|-----------|----------|----------|---------|------------------|-------------------|
| 5.850000 | 113.170000 | 287.160000 | 158.400000 | 71.460000  | 333.970000 | -19.3366 | 59.6917  | -25.1947  | 18.2959  | -22.3456 | 3.3000  | 14.4107          | -4.0456           |
| 5.900000 | 115.370000 | 201.680000 | 236.780000 | 74.140000  | 118.670000 | -15.8987 | 47.2395  | -19.2303  | 13.6511  | -20.2160 | 2.8132  | 8.3587           | -0.7606           |
| 6.100000 | 97.530000  | 157.190000 | 154.420000 | 15.870000  | 212.000000 | -4.4091  | 28.9958  | -12.5869  | 7.7049   | -13.2513 | 1.4678  | 7.9211           | -0.3127           |
| 6.150000 | 82.610000  | 174.930000 | 85.970000  | 12.990000  | 274.500000 | -4.7215  | 30.4146  | -13.0973  | 7.6550   | -13.5789 | 1.5002  | 8.1722           | -0.0265           |
| 6.300000 | 77.320000  | 174.170000 | 157.940000 | 20.170000  | 91.230000  | -4.3571  | 23.7028  | -10.1174  | 5.7220   | -11.7460 | 1.2415  | 4.4459           | -0.1550           |
| 6.300000 | 79.270000  | 185.440000 | 219.950000 | 21.140000  | 248.650000 | -3.7813  | 27.2813  | -11.6061  | 6.6923   | -12.2357 | 1.3014  | 7.6519           | 0.3856            |
| 6.770000 | 78.410000  | 41.670000  | 183.010000 | 73.400000  | 11.250000  | -9.4782  | 22.2983  | -9.0066   | 6.6241   | -9.2575  | 1.2296  | 2.4097           | 0.3264            |
| 6.900000 | 122.140000 | 34.770000  | 146.900000 | 107.470000 | 359.330000 | -16.1467 | 29.5660  | -12.9302  | 8.9887   | -11.6741 | 1.5977  | -0.5986          | -0.0121           |
| 7.500000 | 98.930000  | 338.090000 | 85.560000  | 86.530000  | 0.580000   | -8.9392  | 24.6783  | -10.3906  | 7.2234   | -9.1273  | 1.3628  | 4.8074           | -0.1439           |
| 6.150000 | 164.580000 | 62.680000  | 97.030000  | 88.060000  | 350.850000 | -2.6505  | 33.0742  | -14.3000  | 8.1306   | -13.5447 | 1.4186  | 12.1282          | 0.6639            |
| 6.000000 | 112.180000 | 291.090000 | 201.080000 | 38.530000  | 178.120000 | -16.5698 | 38.9884  | -19.8315  | 14.8144  | -18.2445 | 2.6266  | 1.7836           | -0.0153           |
| 6.450000 | 89.120000  | 116.840000 | 143.430000 | 97.190000  | 52.630000  | -16.4302 | 47.3120  | -22.8560  | 20.7299  | -19.1050 | 3.2689  | 12.9195          | 0.0801            |
| 4.250000 | 40.030000  | 356.030000 | 82.840000  | 22.260000  | 61.240000  | -52.8872 | 202.1135 | -153.5633 | 108.3668 | -43.9803 | 8.4190  | 68.4685          | 3.3332            |
| 5.150000 | 32.910000  | 304.000000 | 158.440000 | 13.980000  | 47.760000  | -42.2163 | 135.5544 | -87.6949  | 59.6164  | -25.6526 | 4.0817  | 43.6888          | 2.2042            |
| 6.500000 | 121.540000 | 331.940000 | 221.410000 | 102.760000 | 14.000000  | -52.7607 | 143.6421 | -83.3632  | 55.6487  | -28.7263 | 4.7036  | 39.1441          | 0.4003            |
| 4.750000 | 179.390000 | 51.100000  | 6.430000   | 152.540000 | 132.760000 | -47.5096 | 147.1293 | -94.7112  | 63.6528  | -29.2803 | 4.6565  | 43.9375          | 1.5023            |
| 5.750000 | 115.370000 | 201.680000 | 236.780000 | 74.140000  | 118.670000 | -23.2108 | 71.9380  | -30.3511  | 21.9378  | -25.8762 | 3.9263  | 18.3639          | 3.0126            |
| 5.650000 | 84.960000  | 272.110000 | 108.770000 | 33.950000  | 324.820000 | -70.9749 | 214.9407 | -143.6468 | 94.1102  | -38.9116 | 6.5971  | 62.1146          | 4.2036            |

## B. Minima

TABLE II: SAPT(DFT) minima. These points were not used during the fit process.  $R$ —distance between centers of the mass of the monomers (in Å),  $\beta_A$ ,  $\gamma_A$ ,  $\alpha_B$ ,  $\beta_B$ ,  $\gamma_B$ —Euler angles (in degrees), ‘elst’— $E_{\text{elst}}^{(1)}$ (KS), ‘exch’— $E_{\text{exch}}^{(1)}$ (KS), ‘ind’— $E_{\text{ind}}^{(2)}$ (CKS), ‘ex-ind’— $\tilde{E}_{\text{exch-ind}}^{(2)}$ (CKS), ‘disp’— $E_{\text{disp}}^{(2)}$ (CKS), ‘ex-disp’— $\tilde{E}_{\text{exch-disp}}^{(2)}$ (CKS),  $E_{\text{int}}$ —total interaction energy,  $E_{\text{diff}} = E_{\text{int}} - E_{\text{fit}}$ , where  $E_{\text{fit}}$  is the energy obtained from the fit. Energies in kcal/mol

| label | $R$      | $\beta_A$  | $\gamma_A$ | $\alpha_B$  | $\beta_B$  | $\gamma_B$ | elst     | exch    | ind     | ex-ind | disp     | ex-disp | $E_{\text{int}}$ | $E_{\text{diff}}$ |
|-------|----------|------------|------------|-------------|------------|------------|----------|---------|---------|--------|----------|---------|------------------|-------------------|
| M1    | 6.766295 | 128.290150 | 10.696934  | -180.000000 | 51.709850  | 169.303065 | -10.9444 | 9.6765  | -5.7445 | 3.2365 | -9.8383  | 0.8789  | -12.7353         | -0.1863           |
| M2    | 6.704955 | 143.110469 | 337.996061 | 197.867772  | 116.908576 | 13.396135  | -9.3692  | 8.4847  | -4.1109 | 2.2101 | -8.1084  | 0.6739  | -10.2198         | -0.0223           |
| M3    | 6.861727 | 75.130823  | 149.441124 | 172.219069  | 42.613597  | 183.611206 | -8.9953  | 8.0913  | -4.5276 | 2.6893 | -8.0057  | 0.7044  | -10.0436         | -0.0606           |
| M4    | 6.775285 | 133.816792 | 359.111718 | 168.130091  | 95.244927  | 277.115656 | -8.3508  | 7.7887  | -4.5057 | 2.8219 | -8.1792  | 0.7154  | -9.7097          | 0.0163            |
| M5    | 6.428682 | 78.730654  | 65.968000  | 176.483356  | 36.637583  | 150.534654 | -8.3633  | 7.8904  | -3.7609 | 2.0577 | -7.9259  | 0.6314  | -9.4705          | -0.0521           |
| M6    | 6.454009 | 139.172718 | 2.738307   | 192.412383  | 79.211231  | 59.972651  | -7.5624  | 7.7360  | -4.7476 | 3.0611 | -8.5200  | 0.7030  | -9.3299          | -0.1552           |
| M7    | 5.437827 | 10.114657  | 301.388608 | 68.502597   | 68.834761  | 205.531926 | -7.7366  | 10.8391 | -6.1059 | 4.2689 | -11.1715 | 0.9658  | -8.9401          | 0.0095            |
| M8    | 6.343169 | 99.926925  | 237.241509 | -180.000000 | 80.073075  | 302.758490 | -8.6305  | 9.7035  | -6.3832 | 5.2587 | -9.6489  | 0.9305  | -8.7700          | -0.0340           |
| M9    | 6.315034 | 100.400777 | 118.429646 | 171.275288  | 79.599223  | 298.429646 | -8.6701  | 10.1347 | -6.5685 | 5.4173 | -9.8761  | 0.9627  | -8.6000          | -0.0087           |
| M10   | 5.428550 | 37.394556  | 37.070746  | -60.037782  | 64.085810  | 203.130017 | -6.5256  | 10.5779 | -5.8105 | 3.6720 | -11.3381 | 0.9381  | -8.4862          | 0.0560            |
| M11   | 4.526236 | 36.712958  | 80.133520  | 175.400526  | 149.501897 | 86.811766  | -6.6441  | 11.8199 | -5.8406 | 4.6952 | -13.0626 | 1.0404  | -7.9920          | -0.0213           |
| M12   | 5.402731 | 120.954270 | 337.730130 | 351.331482  | 135.481387 | 199.788768 | -5.5967  | 9.8482  | -4.8715 | 2.8610 | -11.0526 | 0.8397  | -7.9719          | 0.0448            |
| M13   | 6.226084 | 33.246705  | 172.134260 | 298.230153  | 13.490308  | 131.253145 | -5.6488  | 6.3353  | -3.2788 | 1.6623 | -7.0420  | 0.5393  | -7.4327          | 0.0537            |
| M14   | 6.923188 | 79.488431  | 180.000000 | 180.000000  | 100.511569 | 359.999999 | -6.1577  | 5.9712  | -2.3515 | 1.2853 | -6.6184  | 0.4824  | -7.3887          | -0.0406           |
| M15   | 5.138125 | 11.826484  | 321.019660 | 127.293616  | 82.341869  | 320.743199 | -5.7506  | 9.4766  | -5.0442 | 3.7676 | -10.6063 | 0.8306  | -7.3264          | -0.1167           |
| M16   | 5.122933 | 105.281811 | 142.026583 | 20.526774   | 140.666328 | 174.383837 | -5.7651  | 9.7502  | -4.6781 | 3.1475 | -10.5344 | 0.7896  | -7.2902          | -0.0277           |
| M17   | 4.457892 | 40.420233  | 71.056046  | 76.825895   | 139.579767 | 251.056046 | -6.5838  | 12.7797 | -5.4872 | 4.4082 | -13.4182 | 1.0830  | -7.2183          | 0.0778            |
| M18   | 6.486649 | 109.523894 | 228.775824 | 162.907105  | 83.746305  | 249.173418 | -5.4473  | 5.9634  | -2.7234 | 1.5444 | -6.9869  | 0.5117  | -7.1381          | 0.0610            |
| M19   | 6.716188 | 77.044035  | 181.796016 | 192.063526  | 70.471225  | 53.205953  | -4.6673  | 4.5960  | -2.2761 | 1.1542 | -6.3106  | 0.4125  | -7.0914          | -0.0048           |
| M20   | 6.484926 | 110.259689 | 241.217816 | 218.504096  | 81.023587  | 113.443295 | -5.0360  | 5.3647  | -2.4922 | 1.3590 | -6.7472  | 0.4644  | -7.0873          | -0.0040           |
| M21   | 4.891002 | 32.832636  | 6.917928   | 257.244467  | 51.404490  | 38.342505  | -4.1400  | 8.2012  | -4.2172 | 2.7675 | -10.4133 | 0.7159  | -7.0860          | 0.1166            |
| M22   | 5.082602 | 36.874066  | 352.488082 | 44.007516   | 69.276424  | 72.247460  | -4.7647  | 8.2661  | -4.0735 | 2.7316 | -9.9119  | 0.6928  | -7.0595          | -0.0959           |
| M23   | 5.113645 | 77.594923  | 92.124238  | -135.531787 | 170.492007 | 198.419492 | -5.4450  | 10.0868 | -5.2007 | 3.8404 | -11.1791 | 0.9024  | -6.9952          | 0.0993            |
| M24   | 4.756937 | 25.868850  | 353.430035 | 126.778696  | 46.706049  | 60.754592  | -4.2134  | 9.3693  | -4.7646 | 3.0635 | -11.1683 | 0.7956  | -6.9180          | 0.1946            |
| M25   | 4.852452 | 17.963886  | 357.416109 | 116.889276  | 53.682925  | 44.725365  | -4.6639  | 9.1268  | -4.6552 | 3.1135 | -10.5781 | 0.7697  | -6.8871          | 0.1499            |
| M26   | 4.901830 | 45.648098  | 67.598422  | 127.300430  | 109.005538 | 159.243046 | -6.0788  | 11.5924 | -5.2207 | 4.1782 | -12.3598 | 1.0065  | -6.8823          | 0.0555            |
| M27   | 5.368184 | 1.804789   | 288.085981 | 160.352962  | 59.519651  | 316.451090 | -5.0277  | 6.7437  | -3.3124 | 2.1552 | -7.9856  | 0.5667  | -6.8601          | 0.0015            |
| M28   | 4.853017 | 121.373468 | 229.097735 | 8.607628    | 150.392320 | 174.690541 | -4.6231  | 9.4911  | -4.4818 | 2.8449 | -10.8607 | 0.7723  | -6.8573          | -0.0312           |
| M29   | 5.285392 | 60.130296  | 144.329988 | 310.475331  | 146.344772 | 175.091333 | -6.5211  | 11.3899 | -5.7963 | 4.4214 | -11.1821 | 0.9858  | -6.7024          | -0.2925           |
| M30   | 5.936414 | 164.886576 | 311.297916 | -17.307708  | 120.070500 | 131.876711 | -4.6065  | 6.4209  | -3.2125 | 1.5494 | -7.2835  | 0.5253  | -6.6068          | -0.1219           |
| M31   | 7.221587 | 84.412144  | 0.188166   | 38.763283   | 12.341873  | 40.520041  | -6.4056  | 5.6850  | -2.8691 | 1.5852 | -5.0562  | 0.4970  | -6.5637          | 0.2835            |
| M32   | 5.286331 | 32.154454  | 11.952369  | 295.998305  | 114.913326 | 317.923741 | -6.3449  | 11.8617 | -5.9606 | 4.4024 | -11.5185 | 1.0146  | -6.5452          | -0.1986           |
| M33   | 5.019124 | 7.839744   | 36.033104  | -125.515771 | 32.814829  | 107.331510 | -3.1305  | 7.2362  | -4.2470 | 2.4230 | -9.3693  | 0.6452  | -6.4422          | -0.0291           |
| M34   | 6.410035 | 151.869659 | 212.206775 | 25.024706   | 154.440595 | 326.354065 | -5.3250  | 4.7157  | -2.4060 | 1.1704 | -4.9867  | 0.3896  | -6.4420          | 0.0004            |
| M35   | 6.183990 | 64.931325  | 316.683488 | 7.179166    | 5.346871   | 309.363589 | -4.0964  | 4.5507  | -2.3345 | 0.9824 | -5.8595  | 0.3765  | -6.3808          | 0.0175            |

continued on next page

| label | $R$      | $\beta_A$  | $\gamma_A$ | $\alpha_B$  | $\beta_B$  | $\gamma_B$ | elst    | exch   | ind     | ex-ind | disp     | ex-disp | $E_{\text{int}}$ | $E_{\text{diff}}$ |
|-------|----------|------------|------------|-------------|------------|------------|---------|--------|---------|--------|----------|---------|------------------|-------------------|
| M36   | 5.478756 | 151.764943 | 93.366865  | 335.602302  | 173.805722 | 35.794151  | -3.6607 | 5.0544 | -2.9392 | 1.5778 | -6.8525  | 0.4568  | -6.3635          | 0.1832            |
| M37   | 5.270040 | 35.847611  | 344.535208 | 340.574280  | 111.688423 | 94.108421  | -4.7828 | 7.8080 | -3.7893 | 2.7675 | -8.9951  | 0.6792  | -6.3125          | 0.0385            |
| M38   | 6.081170 | 56.389374  | 333.932079 | 8.718978    | 36.621884  | 57.301550  | -4.8066 | 5.0045 | -2.6584 | 1.4147 | -5.6338  | 0.4330  | -6.2465          | -0.0143           |
| M39   | 5.549777 | 41.017871  | 2.150758   | -3.233374   | 112.923000 | 32.813781  | -4.4703 | 7.8727 | -3.9986 | 2.9117 | -9.2500  | 0.7123  | -6.2222          | -0.0705           |
| M40   | 6.040717 | 135.994743 | 214.081385 | 24.638693   | 124.473897 | 206.075915 | -4.9985 | 5.7303 | -2.8600 | 1.5393 | -6.0326  | 0.4739  | -6.1475          | 0.1144            |
| M41   | 6.324103 | 167.589877 | 34.342187  | -39.196227  | 155.231319 | 24.690445  | -4.9812 | 5.0407 | -2.5570 | 1.2507 | -5.2679  | 0.4134  | -6.1012          | 0.2487            |
| M42   | 5.299816 | 70.327156  | 29.193747  | 187.878702  | 109.672844 | 209.193747 | -4.5192 | 8.7458 | -3.4738 | 2.7442 | -10.1980 | 0.7535  | -5.9475          | 0.0737            |
| M43   | 4.989843 | 161.161072 | 360.000000 | 0.000000    | 146.070095 | 180.000000 | -2.3556 | 6.6433 | -3.7211 | 2.0936 | -9.0301  | 0.5837  | -5.7863          | 0.0433            |
| M44   | 4.868653 | 160.391949 | 301.103440 | 292.758090  | 151.784603 | 195.630755 | -2.3862 | 7.5998 | -4.1286 | 2.2891 | -9.7910  | 0.6382  | -5.7786          | 0.0797            |
| M45   | 4.854198 | 163.966213 | 162.742443 | -97.613174  | 155.998900 | 183.653736 | -2.2171 | 6.1571 | -3.2912 | 1.8494 | -8.7925  | 0.5411  | -5.7532          | -0.1762           |
| M46   | 5.200438 | 29.134812  | 22.588235  | 280.717298  | 103.850420 | 83.978572  | -3.7612 | 8.4489 | -4.0825 | 2.9857 | -9.9919  | 0.7643  | -5.6367          | 0.0743            |
| M47   | 6.337670 | 57.819004  | 54.551125  | -105.094279 | 31.790565  | 334.174066 | -4.4767 | 5.0385 | -2.3195 | 1.0741 | -5.2480  | 0.3910  | -5.5406          | 0.2271            |
| M48   | 5.752499 | 135.268500 | 229.575358 | -155.896732 | 173.246595 | 356.977369 | -3.3892 | 4.1691 | -1.9469 | 1.2768 | -5.9843  | 0.3853  | -5.4891          | 0.0686            |
| M49   | 6.644544 | 88.796914  | 232.876257 | 143.495564  | 21.289781  | 281.213655 | -3.1115 | 6.5502 | -4.2069 | 2.7153 | -6.4759  | 0.5963  | -3.9324          | 0.5128            |
| M50   | 6.198774 | 158.956978 | 176.513252 | 168.863180  | 72.443860  | 319.218991 | 0.8836  | 9.4787 | -5.1851 | 3.0200 | -8.4168  | 0.7737  | 0.5540           | 0.6454            |
| M51   | 5.997391 | 164.031259 | 180.000000 | 180.000000  | 15.968741  | 360.000000 | 7.3280  | 8.9738 | -5.0170 | 2.0201 | -8.0418  | 0.6456  | 5.9086           | -0.2392           |

### C. Results used for testing the accuracy of the fit

TABLE III: SAPT(DFT) results for points for random angular configurations. These points were not used for the fit.  $R$ —distance between centers of the mass of the monomers (in Å),  $\beta_A$ ,  $\gamma_A$ ,  $\alpha_B$ ,  $\beta_B$ ,  $\gamma_B$ —Euler angles (in degrees), ‘elst’— $E_{\text{elst}}^{(1)}$ (KS), ‘exch’— $E_{\text{exch}}^{(1)}$ (KS), ‘ind’— $E_{\text{ind}}^{(2)}$ (CKS), ‘ex-ind’— $\tilde{E}_{\text{exch-ind}}^{(2)}$ (CKS), ‘disp’— $E_{\text{disp}}^{(2)}$ (CKS), ‘ex-disp’— $\tilde{E}_{\text{exch-disp}}^{(2)}$ (CKS),  $E_{\text{int}}$ —total interaction energy,  $E_{\text{diff}} = E_{\text{int}} - E_{\text{fit}}$ , where  $E_{\text{fit}}$  is the energy obtained from the fit. Energies in kcal/mol

| $R$      | $\beta_A$  | $\gamma_A$ | $\alpha_B$ | $\beta_B$  | $\gamma_B$ | elst    | exch   | ind     | ex-ind | disp    | ex-disp | $E_{\text{int}}$ | $E_{\text{diff}}$ |
|----------|------------|------------|------------|------------|------------|---------|--------|---------|--------|---------|---------|------------------|-------------------|
| 5.000000 | 8.580000   | 146.220000 | 243.790000 | 159.340000 | 142.650000 | 0.8769  | 3.4471 | -1.3909 | 1.1126 | -5.2334 | 0.2780  | -0.9098          | 0.5666            |
| 5.650000 | 11.920000  | 40.610000  | 78.330000  | 140.730000 | 272.930000 | -0.7086 | 3.0194 | -1.4323 | 1.1421 | -4.3546 | 0.2759  | -2.0580          | -0.5985           |
| 5.900000 | 10.090000  | 341.180000 | 8.870000   | 140.770000 | 32.230000  | -0.5384 | 3.7603 | -1.7263 | 1.3978 | -4.5227 | 0.3343  | -1.2950          | 0.4682            |
| 5.900000 | 11.010000  | 90.730000  | 336.900000 | 9.550000   | 83.520000  | -3.5095 | 3.1520 | -1.8252 | 0.8958 | -4.2851 | 0.2633  | -5.3087          | -0.0501           |
| 6.000000 | 166.650000 | 284.300000 | 359.520000 | 136.110000 | 199.630000 | -2.4286 | 1.9242 | -1.2890 | 0.4820 | -3.4882 | 0.1613  | -4.6382          | -0.3619           |
| 6.350000 | 102.880000 | 242.350000 | 153.090000 | 15.080000  | 219.250000 | -1.8392 | 5.6520 | -3.8192 | 2.3097 | -6.6688 | 0.5325  | -3.8331          | 0.1118            |
| 6.350000 | 163.800000 | 160.610000 | 128.490000 | 161.710000 | 55.430000  | -4.1683 | 3.7323 | -1.7726 | 0.9292 | -4.1055 | 0.3011  | -5.0837          | 0.1965            |
| 6.500000 | 110.210000 | 255.410000 | 317.690000 | 149.100000 | 251.030000 | -2.5593 | 2.5206 | -1.1660 | 0.6324 | -3.3458 | 0.2100  | -3.7081          | -0.2135           |
| 6.550000 | 85.780000  | 61.310000  | 182.190000 | 168.700000 | 252.220000 | 0.0331  | 1.9540 | -0.7900 | 0.5183 | -2.8054 | 0.1653  | -0.9248          | 0.4968            |
| 6.700000 | 124.670000 | 67.390000  | 106.600000 | 142.570000 | 183.690000 | 0.0612  | 0.5469 | -0.3819 | 0.1249 | -1.8797 | 0.0521  | -1.4764          | -0.1057           |
| 6.750000 | 94.930000  | 333.590000 | 57.900000  | 161.650000 | 285.750000 | -1.5925 | 3.5576 | -1.4315 | 1.0779 | -4.2007 | 0.3175  | -2.2717          | -0.3838           |
| 6.750000 | 115.180000 | 82.410000  | 143.660000 | 164.520000 | 349.970000 | -0.6284 | 1.3783 | -0.6095 | 0.2864 | -2.8532 | 0.1188  | -2.3076          | -0.2192           |
| 6.850000 | 114.210000 | 277.570000 | 128.120000 | 27.940000  | 145.480000 | 2.3414  | 1.4402 | -1.1502 | 0.3098 | -3.4359 | 0.1311  | -0.3635          | 0.4766            |
| 6.900000 | 94.750000  | 251.380000 | 315.450000 | 1.940000   | 0.910000   | -0.7601 | 2.7578 | -1.7475 | 0.8235 | -3.8107 | 0.2413  | -2.4957          | -0.3221           |
| 6.950000 | 140.360000 | 213.890000 | 108.160000 | 147.220000 | 354.670000 | -3.5360 | 2.4608 | -1.2670 | 0.4693 | -3.3377 | 0.1928  | -5.0177          | -0.4363           |
| 6.950000 | 151.440000 | 345.030000 | 235.780000 | 91.050000  | 251.700000 | -1.4780 | 2.0677 | -1.3119 | 0.4346 | -3.7035 | 0.1741  | -3.8171          | -0.0002           |
| 7.000000 | 133.450000 | 200.800000 | 71.310000  | 73.900000  | 340.810000 | 3.1340  | 3.3457 | -1.6390 | 0.6482 | -3.8353 | 0.2374  | 1.8910           | -0.9817           |
| 7.100000 | 157.540000 | 120.090000 | 277.730000 | 127.900000 | 91.430000  | -3.7040 | 3.3534 | -1.7169 | 0.7753 | -3.5514 | 0.2867  | -4.5567          | -0.2745           |
| 7.150000 | 39.890000  | 93.180000  | 137.530000 | 34.620000  | 196.950000 | -3.6296 | 3.9514 | -2.2244 | 1.6886 | -4.3284 | 0.3892  | -4.1532          | 0.0341            |
| 7.150000 | 42.140000  | 188.230000 | 85.050000  | 22.000000  | 100.070000 | -3.2282 | 2.7395 | -1.4057 | 0.5484 | -3.1345 | 0.2065  | -4.2739          | 0.0593            |
| 7.150000 | 82.900000  | 164.800000 | 211.910000 | 157.580000 | 140.320000 | 0.1658  | 0.5913 | -0.3059 | 0.1198 | -1.5053 | 0.0506  | -0.8837          | -0.0568           |
| 7.150000 | 167.480000 | 230.200000 | 211.650000 | 111.940000 | 338.880000 | -2.9818 | 3.2646 | -1.8204 | 0.6943 | -3.8523 | 0.2676  | -4.4279          | -0.3058           |
| 7.300000 | 90.180000  | 104.950000 | 251.260000 | 37.150000  | 258.860000 | 0.4950  | 1.9168 | -1.1648 | 0.6096 | -2.9056 | 0.1735  | -0.8755          | 0.3283            |
| 7.350000 | 56.750000  | 269.860000 | 37.220000  | 24.090000  | 222.190000 | -2.7250 | 2.5042 | -1.3338 | 0.6083 | -2.7995 | 0.2063  | -3.5394          | -0.2721           |
| 7.400000 | 27.700000  | 93.480000  | 46.780000  | 138.460000 | 270.990000 | 0.7419  | 0.7342 | -0.2951 | 0.1590 | -1.3955 | 0.0663  | 0.0108           | -0.0344           |
| 7.400000 | 121.060000 | 182.120000 | 188.490000 | 67.830000  | 240.530000 | -0.4936 | 1.0910 | -0.7151 | 0.1500 | -2.4070 | 0.0869  | -2.2879          | 0.2738            |
| 7.550000 | 81.060000  | 330.280000 | 307.520000 | 64.730000  | 280.290000 | -2.1429 | 1.7034 | -0.8553 | 0.3876 | -2.6108 | 0.1532  | -3.3649          | -0.2261           |
| 7.600000 | 91.450000  | 127.130000 | 9.400000   | 62.380000  | 97.730000  | 2.6843  | 0.3993 | -0.3587 | 0.0843 | -1.8539 | 0.0431  | 0.9984           | 0.1080            |
| 7.600000 | 99.530000  | 126.310000 | 205.410000 | 96.190000  | 97.690000  | -2.5149 | 0.5176 | -0.4049 | 0.1350 | -1.9880 | 0.0579  | -4.1973          | -0.2728           |
| 7.600000 | 153.600000 | 61.040000  | 27.380000  | 121.840000 | 59.850000  | -2.2789 | 2.5198 | -1.3597 | 0.6502 | -2.7815 | 0.2120  | -3.0382          | 0.0132            |
| 7.750000 | 122.600000 | 225.410000 | 337.370000 | 25.990000  | 280.200000 | 3.4015  | 0.0952 | -0.3501 | 0.0167 | -0.9438 | 0.0104  | 2.2299           | -0.0801           |
| 7.800000 | 55.230000  | 118.200000 | 300.770000 | 159.740000 | 30.140000  | 0.6396  | 0.7742 | -0.3579 | 0.1941 | -1.6378 | 0.0736  | -0.3142          | -0.4356           |
| 7.950000 | 82.660000  | 149.400000 | 105.060000 | 114.320000 | 132.800000 | 0.1860  | 0.6369 | -0.3248 | 0.1350 | -1.4795 | 0.0575  | -0.7889          | -0.0759           |
| 7.950000 | 104.450000 | 209.980000 | 32.050000  | 96.060000  | 316.990000 | 1.7527  | 0.5312 | -0.3594 | 0.1355 | -1.6914 | 0.0536  | 0.4222           | -0.2752           |
| 8.250000 | 69.960000  | 238.450000 | 144.330000 | 113.670000 | 98.730000  | -0.6506 | 1.2303 | -0.5421 | 0.3565 | -1.9126 | 0.1199  | -1.3986          | 0.0520            |
| 8.700000 | 47.420000  | 215.310000 | 271.540000 | 122.880000 | 274.680000 | 0.7948  | 0.5573 | -0.2897 | 0.1221 | -1.1347 | 0.0570  | 0.1069           | 0.1158            |

continued on next page

| $R$      | $\beta_A$  | $\gamma_A$ | $\alpha_B$ | $\beta_B$  | $\gamma_B$ | elst    | exch   | ind     | ex-ind | disp    | ex-disp | $E_{\text{int}}$ | $E_{\text{diff}}$ |
|----------|------------|------------|------------|------------|------------|---------|--------|---------|--------|---------|---------|------------------|-------------------|
| 5.200000 | 25.000000  | 350.870000 | 241.900000 | 13.720000  | 229.690000 | -1.1583 | 3.6285 | -2.2679 | 1.2182 | -6.3649 | 0.3347  | -4.6097          | -0.2038           |
| 5.200000 | 138.680000 | 260.260000 | 57.970000  | 152.900000 | 203.160000 | -2.0257 | 4.9727 | -2.7355 | 1.8196 | -6.9330 | 0.4476  | -4.4543          | 0.2513            |
| 5.800000 | 84.120000  | 147.650000 | 19.670000  | 173.450000 | 35.120000  | -3.5555 | 5.5636 | -2.5743 | 1.5780 | -7.0429 | 0.4659  | -5.5652          | -0.1743           |
| 6.650000 | 16.060000  | 138.330000 | 7.220000   | 177.790000 | 331.000000 | 1.4813  | 0.8743 | -0.3714 | 0.1952 | -1.8726 | 0.0801  | 0.3869           | 0.1280            |
| 6.850000 | 138.770000 | 356.880000 | 197.610000 | 101.840000 | 32.720000  | -8.0335 | 6.8940 | -3.7748 | 2.0728 | -7.4390 | 0.5986  | -9.6819          | 0.0136            |
| 6.850000 | 175.110000 | 239.150000 | 30.050000  | 91.820000  | 8.190000   | 1.3132  | 2.5366 | -1.6181 | 0.4698 | -3.9910 | 0.2046  | -1.0849          | -0.0615           |
| 7.200000 | 20.080000  | 209.740000 | 356.940000 | 83.970000  | 139.870000 | -0.2346 | 3.4978 | -1.3460 | 0.9720 | -3.6931 | 0.2987  | -0.5051          | -0.1708           |
| 7.200000 | 24.100000  | 246.570000 | 299.770000 | 8.360000   | 341.180000 | -2.7357 | 0.4251 | -0.4784 | 0.0765 | -1.4882 | 0.0419  | -4.1588          | -0.0361           |
| 7.900000 | 178.680000 | 220.370000 | 325.800000 | 27.230000  | 148.560000 | 2.2796  | 0.0480 | -0.3309 | 0.0082 | -0.7743 | 0.0048  | 1.2355           | -0.0433           |
| 8.100000 | 68.610000  | 343.950000 | 323.680000 | 142.710000 | 354.850000 | 1.0694  | 0.4779 | -0.2488 | 0.0735 | -1.4309 | 0.0447  | -0.0143          | -0.3893           |
| 8.200000 | 71.120000  | 340.110000 | 63.190000  | 158.480000 | 54.210000  | 1.3470  | 0.2168 | -0.1511 | 0.0340 | -0.9241 | 0.0216  | 0.5443           | -0.0484           |
| 8.250000 | 127.640000 | 45.550000  | 247.450000 | 29.010000  | 215.160000 | 1.7322  | 0.0485 | -0.2471 | 0.0117 | -0.8385 | 0.0064  | 0.7131           | -0.2835           |
| 9.250000 | 130.040000 | 190.290000 | 129.010000 | 25.560000  | 172.710000 | 1.2473  | 0.0004 | -0.1073 | 0.0001 | -0.2447 | 0.0001  | 0.8960           | -0.0089           |
| 9.400000 | 115.890000 | 164.050000 | 94.120000  | 45.350000  | 128.890000 | 1.0264  | 0.0007 | -0.0753 | 0.0002 | -0.2581 | 0.0002  | 0.6940           | -0.0695           |

## IV. PARAMETERS OF THE FIT

TABLE IV: Fit site charges (in atomic units). Label  $a$  corresponds to the atom index given in Sec. II.

| $a$ | $q_a$               |
|-----|---------------------|
| 1   | -0.0631558250528601 |
| 2   | -0.0605077339297177 |
| 3   | 0.0438629867205891  |
| 4   | -0.3050927387724645 |
| 5   | 0.5384283024914093  |
| 6   | 0.8057452976464486  |
| 7   | -0.3600250729340762 |
| 8   | -0.4003422443395674 |
| 9   | -0.3845608917613371 |
| 10  | 0.1348242357270883  |
| 11  | 0.1362372746920613  |
| 12  | 0.1896840302305909  |
| 13  | 0.1612723440765424  |

TABLE V: Two-site parameters of the fit.  $\alpha_{ab}$  ( $1/\text{\AA}$ ),  $\exp(\beta_{ab})$  (kcal/mol),  $a_1^{ab}$  ( $1/\text{\AA}$ ),  $a_2^{ab}$  ( $1/\text{\AA}^2$ ),  $C_6^{ab}$  (kcal/mol $\times 1/\text{\AA}^6$ ),  $\delta_1^{ab}$ ,  $\delta_6^{ab}$  ( $1/\text{\AA}$ ). Labels  $a$  and  $b$  correspond to the atom index given in Sec. II. For the functional form of the fit, see the main paper.

| $a$ | $b$ | $\alpha_{ab}$  | $\beta_{ab}$   | $a_1^{ab}$      | $a_2^{ab}$      | $C_6^{ab}$     | $\delta_1^{ab}$ | $\delta_6^{ab}$ |
|-----|-----|----------------|----------------|-----------------|-----------------|----------------|-----------------|-----------------|
| 1   | 1   | 9.999983001306 | 9.04592407e-01 | 3.46214017e+13  | -1.20139948e+13 | 1.14357269e+02 | 1.14118708e+01  | 9.99981862e+00  |
| 2   | 1   | 3.970650804628 | 1.78196163e+01 | -6.69207745e-01 | 1.13466674e-01  | 1.21648845e+02 | 1.00000000e+00  | 9.99993049e+00  |
| 2   | 2   | 2.248845355997 | 1.09537766e+01 | -6.52479561e-01 | 1.04419437e-01  | 8.54506647e+02 | 1.34417070e+01  | 9.99985843e+00  |
| 3   | 1   | 2.404735902751 | 2.36565771e-03 | 1.92681173e+04  | -6.91183599e+03 | 9.10131484e+01 | 9.98119559e+00  | 9.99983062e+00  |
| 3   | 2   | 1.305186163316 | 8.54909994e+00 | -6.36116294e-01 | 9.41867082e-02  | 3.53132349e+02 | 9.91841841e+00  | 9.99991616e+00  |
| 3   | 3   | 2.230854286325 | 1.35155044e+01 | -5.75856684e-01 | 8.49092886e-02  | 5.93152910e+02 | 9.36775960e+00  | 9.99823289e+00  |
| 4   | 1   | 1.362890679409 | 8.03720957e+00 | -5.10142875e-01 | 3.99995401e-02  | 1.57170890e+02 | 1.51232197e+01  | 9.99953706e+00  |
| 4   | 2   | 1.961843700134 | 1.58164998e+00 | 6.03555754e+02  | -2.55858700e+02 | 2.80251014e+02 | 3.48483440e+00  | 9.99982730e+00  |
| 4   | 3   | 2.446644977826 | 1.32858809e+01 | -6.50455785e-01 | 1.10470634e-01  | 2.34751000e+02 | 9.99375000e+00  | 1.38722831e+00  |
| 4   | 4   | 2.026651779531 | 1.01490643e+01 | -7.13953883e-01 | 1.45187742e-01  | 2.18567631e+02 | 1.17305744e+01  | 1.00000000e+01  |
| 5   | 1   | 9.999999989744 | 1.99770690e+01 | 3.36070299e+03  | -1.24200632e+03 | 1.01413657e+02 | 9.99999563e+00  | 9.98459564e+00  |
| 5   | 2   | 2.446388928980 | 7.46400572e-02 | 1.09888871e+04  | -3.81564882e+03 | 3.53082104e+02 | 9.99970313e+00  | 9.9999654e+00   |
| 5   | 3   | 2.689925200035 | 3.18257309e-07 | -1.36012714e+04 | 6.71819469e+03  | 2.23056232e+02 | 1.00000000e+00  | 9.99997020e+00  |
| 5   | 4   | 2.327661647397 | 9.30844726e+00 | -5.54760819e-01 | 6.84632236e-02  | 1.68881978e+02 | 9.99989938e+00  | 1.00000000e+01  |
| 5   | 5   | 1.897085025446 | 6.21667660e+00 | 1.77073889e+00  | -1.32894756e+00 | 7.04804136e+02 | 1.36816592e+01  | 9.99985726e+00  |
| 6   | 1   | 1.537758197181 | 7.39029611e+00 | -6.95991521e-01 | 1.64213369e-01  | 1.64382883e+02 | 9.99999563e+00  | 9.99998837e+00  |
| 6   | 2   | 5.286666027838 | 1.99999993e+01 | -7.18542834e-01 | 1.29609236e-01  | 2.48288781e+02 | 9.99989844e+00  | 9.99992374e+00  |
| 6   | 3   | 1.241097028767 | 7.29238968e+00 | -5.82687759e-01 | 6.39492855e-02  | 2.58103174e+02 | 1.00000000e+00  | 9.99899962e+00  |
| 6   | 4   | 1.686416499530 | 7.02428860e+00 | -6.73321835e-01 | 1.11692757e-01  | 1.57559575e+02 | 9.99999703e+00  | 9.99995827e+00  |
| 6   | 5   | 1.854445730985 | 4.18324867e-09 | 5.62211081e+02  | -1.10850309e+02 | 2.70757436e+02 | 1.70071954e+00  | 9.99999946e+00  |
| 6   | 6   | 9.999999994889 | 8.31230051e+00 | -5.81648250e+08 | 2.50249903e+08  | 3.08627107e+02 | 1.96511283e+00  | 9.99380991e+00  |
| 7   | 1   | 2.854950627615 | 1.10872522e+01 | -6.35507838e-01 | 1.10795721e-01  | 1.74492127e+02 | 1.33772123e+01  | 9.99998375e+00  |

continued on next page

Fit parameters continued from previous page

| $a$ | $b$ | $\alpha_{ab}$  | $\beta_{ab}$   | $a_1^{ab}$      | $a_2^{ab}$      | $C_6^{ab}$     | $\delta_1^{ab}$ | $\delta_6^{ab}$ |
|-----|-----|----------------|----------------|-----------------|-----------------|----------------|-----------------|-----------------|
| 7   | 2   | 1.866908717539 | 8.47290906e+00 | -5.32259203e-01 | 8.01363200e-02  | 2.59781406e+02 | 1.56176897e+01  | 1.00000000e+01  |
| 7   | 3   | 2.316021978672 | 9.14788725e+00 | -4.07943765e-01 | -1.28733392e-03 | 2.43486957e+02 | 9.99929704e+00  | 2.54139198e+00  |
| 7   | 4   | 3.538840013203 | 1.27600886e+01 | -7.90762076e-01 | 1.76815476e-01  | 1.76208936e+02 | 1.00000000e+00  | 3.86961884e+00  |
| 7   | 5   | 1.236494637645 | 4.61780205e+00 | 3.53108187e-01  | -1.01082644e-01 | 2.19498382e+02 | 9.9999979e+00   | 2.49034901e+00  |
| 7   | 6   | 2.026308524910 | 8.10825073e+00 | -7.35707987e-01 | 1.51842623e-01  | 2.08216021e+02 | 3.22562318e+00  | 3.46866901e+00  |
| 7   | 7   | 1.987649334870 | 8.61740077e+00 | -5.39976039e-01 | 7.14846108e-02  | 3.51457725e+02 | 2.80912531e+00  | 9.99996530e+00  |
| 8   | 1   | 1.968592816119 | 8.72490510e+00 | -5.14996664e-01 | 6.36258597e-02  | 1.75069889e+02 | 1.66332764e+01  | 2.48905593e+00  |
| 8   | 2   | 2.295103300328 | 9.99462614e+00 | -6.39983558e-01 | 1.18232204e-01  | 2.34065521e+02 | 1.28346385e+01  | 9.99993817e+00  |
| 8   | 3   | 2.995951577344 | 1.19680500e+01 | -8.02427065e-01 | 1.68592673e-01  | 2.67213274e+02 | 9.99999961e+00  | 9.99998462e+00  |
| 8   | 4   | 6.176252747478 | 1.99991095e+01 | -9.26345575e-01 | 2.19415353e-01  | 1.51538092e+02 | 1.17812019e+00  | 9.98886050e+00  |
| 8   | 5   | 1.631816970102 | 7.88414261e+00 | -6.96430101e-01 | 1.27567366e-01  | 3.02965351e+02 | 9.99531000e+00  | 8.22769333e+00  |
| 8   | 6   | 1.190334767265 | 5.81459669e+00 | -3.87279420e-01 | 4.11730403e-02  | 1.45662756e+02 | 9.99999949e+00  | 9.99982502e+00  |
| 8   | 7   | 3.074099831551 | 1.06322659e+01 | -6.34528314e-01 | 1.56203755e-01  | 2.95968700e+02 | 1.11788604e+00  | 9.99687500e+00  |
| 8   | 8   | 1.904549288670 | 8.88684307e+00 | -6.58793184e-01 | 1.23441758e-01  | 4.68316246e+02 | 1.00000000e+00  | 1.77826451e+00  |
| 9   | 1   | 3.190280717611 | 1.07690213e+01 | -3.20246487e-01 | -1.68142795e-04 | 1.76527142e+02 | 1.00000000e+00  | 9.99983794e+00  |
| 9   | 2   | 2.544362367043 | 1.03198339e+01 | -6.07043664e-01 | 9.36288900e-02  | 1.95473067e+02 | 1.77665179e+01  | 9.99991743e+00  |
| 9   | 3   | 2.388648959675 | 9.63551107e+00 | -6.35760312e-01 | 1.17936139e-01  | 2.98160967e+02 | 1.72003654e+00  | 1.73581171e+00  |
| 9   | 4   | 3.960867903874 | 1.50479258e+01 | -7.69202647e-01 | 1.54945120e-01  | 1.15536728e+02 | 1.03928575e+00  | 9.99717695e+00  |
| 9   | 5   | 2.843353654958 | 1.17837684e+01 | -7.03237725e-01 | 1.24319749e-01  | 3.14361865e+02 | 9.99531000e+00  | 9.99996189e+00  |
| 9   | 6   | 1.676731836921 | 7.27192586e+00 | -6.45147467e-01 | 1.15581356e-01  | 1.33170733e+02 | 2.95438677e+00  | 2.99187099e+00  |
| 9   | 7   | 2.715650965756 | 1.01968248e+01 | -5.51346125e-01 | 9.53459728e-02  | 2.74546655e+02 | 1.38010518e+00  | 9.99999999e+00  |
| 9   | 8   | 2.982452664815 | 1.07256270e+01 | -6.02411037e-01 | 1.16092266e-01  | 2.63879772e+02 | 1.27243253e+00  | 9.99998360e+00  |
| 9   | 9   | 2.272623730096 | 9.89082714e+00 | -6.46959000e-01 | 1.22850613e-01  | 6.52812861e+02 | 1.00000000e+00  | 9.99992817e+00  |
| 10  | 1   | 1.569707988063 | 5.73469888e+00 | 2.02780030e-01  | -2.34788684e-01 | 1.78995133e+02 | 9.99999116e+00  | 6.68098440e+00  |
| 10  | 2   | 3.144103677029 | 9.29302247e+00 | 1.20072467e+00  | -7.15703490e-01 | 2.29701113e+02 | 9.99998907e+00  | 9.99999935e+00  |
| 10  | 3   | 1.262063981625 | 5.87185353e+00 | -4.89210525e-01 | 9.80924787e-02  | 2.66136822e+02 | 1.54677700e+01  | 9.99604127e+00  |
| 10  | 4   | 1.723691818782 | 7.16502068e+00 | -9.15088965e-01 | 2.64574205e-01  | 1.44513152e+02 | 9.99989417e+00  | 9.99998433e+00  |
| 10  | 5   | 3.759496316711 | 1.19259235e+01 | -9.58995264e-01 | 2.55798479e-01  | 2.76800886e+02 | 1.00000000e+00  | 1.00000000e+01  |
| 10  | 6   | 1.393010711547 | 3.51447651e-01 | 6.81809282e+01  | -2.50842141e+01 | 1.49469987e+02 | 1.00000000e+00  | 2.60015568e+00  |
| 10  | 7   | 5.664306031466 | 1.46204812e+01 | -1.22340019e+00 | 3.98250981e-01  | 2.39872707e+02 | 9.99784000e+00  | 1.92803465e+00  |
| 10  | 8   | 2.072438863138 | 7.23581223e+00 | -6.99310812e-01 | 1.31148277e-01  | 2.83288437e+02 | 1.00000000e+01  | 1.00000000e+00  |
| 10  | 9   | 3.544009249175 | 9.45343760e+00 | -8.53137381e-01 | 3.25273936e-01  | 3.47360620e+02 | 9.99999987e+00  | 3.33223951e+00  |
| 10  | 10  | 8.904041062092 | 1.99965108e+01 | -1.21044935e+00 | 3.67475523e-01  | 1.25488861e+02 | 2.18495850e+01  | 2.71567989e+00  |
| 11  | 1   | 1.882404504143 | 2.61861301e-04 | 3.75413239e+02  | -1.14296676e+02 | 1.83481023e+02 | 9.99997998e+00  | 9.99980901e+00  |
| 11  | 2   | 9.999998076341 | 1.99994182e+01 | -4.72288198e+00 | 2.24247524e+00  | 1.68997637e+02 | 1.00000000e+00  | 1.00000000e+00  |
| 11  | 3   | 1.730662315395 | 8.67336658e-05 | -2.99032932e+02 | 1.71323530e+02  | 3.02595113e+02 | 1.39777202e+01  | 9.99997256e+00  |
| 11  | 4   | 1.780399881113 | 7.49334672e+00 | -8.54465765e-01 | 2.07117473e-01  | 1.06934976e+02 | 1.00000000e+01  | 1.00000000e+01  |
| 11  | 5   | 1.460575858226 | 6.54234112e+00 | -5.35393402e-01 | 4.57965527e-02  | 2.66227527e+02 | 1.71468315e+01  | 9.99986352e+00  |
| 11  | 6   | 2.976251011636 | 9.98407954e+00 | -8.25978415e-01 | 2.11717323e-01  | 1.57839382e+02 | 1.00000000e+00  | 1.00000000e+01  |
| 11  | 7   | 5.981544059728 | 2.52597004e-05 | -2.06352893e+05 | 1.87510361e+05  | 2.23147888e+02 | 9.99784000e+00  | 1.47371202e+00  |
| 11  | 8   | 2.746390720026 | 9.01702465e+00 | -6.63767893e-01 | 1.31201632e-01  | 2.75464592e+02 | 1.00000000e+01  | 9.99999411e+00  |
| 11  | 9   | 3.111608609499 | 9.58588705e+00 | -6.29370656e-01 | 1.48853919e-01  | 4.41997631e+02 | 9.99999853e+00  | 9.99999984e+00  |
| 11  | 10  | 1.438370675228 | 5.41091775e+00 | -8.88108170e-01 | 2.05964917e-01  | 1.75581196e+02 | 2.34953719e+00  | 1.97989494e+00  |
| 11  | 11  | 5.614870093957 | 1.04841647e+01 | -2.07478258e+00 | 1.28679943e+00  | 6.19831877e+01 | 1.79940353e+00  | 3.80685018e+00  |
| 12  | 1   | 1.000000000000 | 5.44778750e+00 | -7.87413052e-01 | 7.75285531e-02  | 1.33231443e+02 | 1.00000000e+01  | 9.99999609e+00  |
| 12  | 2   | 1.315740486449 | 6.41582923e+00 | -5.45563631e-01 | 6.36175721e-02  | 1.64424338e+02 | 9.99775000e+00  | 9.99999986e+00  |
| 12  | 3   | 2.142579080204 | 9.50938384e+00 | -8.69563388e-01 | 2.07090502e-01  | 3.49646065e+02 | 1.35644388e+01  | 1.00000000e+01  |
| 12  | 4   | 2.013214982502 | 8.34077034e+00 | -9.06116298e-01 | 2.37933621e-01  | 2.03043458e+01 | 9.9999703e+00   | 1.00000000e+01  |
| 12  | 5   | 2.521927832397 | 1.01418624e+01 | -8.12083134e-01 | 1.91313617e-01  | 3.71216649e+02 | 1.00000000e+00  | 9.99981121e+00  |
| 12  | 6   | 2.551785615817 | 9.78732470e+00 | -7.92206745e-01 | 1.71936068e-01  | 4.97099575e+01 | 1.00690898e+00  | 9.99774552e+00  |
| 12  | 7   | 4.982567267842 | 1.18563500e+01 | -1.20948553e+00 | 5.97665162e-01  | 3.55407747e+02 | 9.99784000e+00  | 9.99883095e+00  |
| 12  | 8   | 5.474557977932 | 1.39750499e+01 | -1.32419473e+00 | 4.77056106e-01  | 2.63871255e+02 | 1.00000000e+01  | 5.21903344e+00  |
| 12  | 9   | 3.534383153329 | 1.13757775e+01 | -8.81959097e-01 | 2.28912462e-01  | 5.68342653e+02 | 1.94121489e+00  | 9.99970907e+00  |
| 12  | 10  | 2.038606284586 | 7.25634800e+00 | -8.47817073e-01 | 2.28658114e-01  | 1.35908190e+02 | 2.61293306e+01  | 5.99167879e+00  |
| 12  | 11  | 1.479948891311 | 6.01705074e+00 | -7.65460119e-01 | 2.06914797e-01  | 1.66406284e+02 | 2.41761348e+01  | 4.10329324e+00  |
| 12  | 12  | 2.524890520257 | 6.73181459e+00 | -1.11305591e+00 | 2.97945362e-01  | 8.08123485e+02 | 2.81354400e+01  | 1.00000000e+00  |
| 13  | 1   | 1.066915964330 | 3.49244197e-09 | 2.18493905e+01  | -8.83844789e+00 | 1.26952344e+02 | 9.99751743e+00  | 9.99983774e+00  |
| 13  | 2   | 5.791960281425 | 1.67511442e+01 | -1.13867741e+00 | 3.27629756e-01  | 1.89024243e+02 | 9.99775000e+00  | 1.39696571e+00  |
| 13  | 3   | 2.510171411235 | 1.10571484e+01 | -7.93104366e-01 | 1.67126395e-01  | 3.20773910e+02 | 1.40073147e+01  | 9.99985790e+00  |
| 13  | 4   | 2.495895395406 | 7.2915858e+00  | -8.68761037e-01 | 1.91125517e-01  | 1.36664344e+01 | 1.00000000e+00  | 1.00000000e+00  |
| 13  | 5   | 3.410537470949 | 9.98752231e+00 | -1.10418495e+00 | 3.94767591e-01  | 3.10823381e+02 | 1.00000000e+00  | 9.99994645e+00  |
| 13  | 6   | 6.293268686515 | 1.79429250e+01 | -1.10753077e+00 | 3.09535200e-01  | 5.84618549e+01 | 1.52836148e+00  | 1.00000000e+00  |
| 13  | 7   | 2.574416823275 | 8.64028226e+00 | -8.24100878e-01 | 1.80571606e-01  | 2.63090412e+02 | 9.99784000e+00  | 1.00000000e+00  |
| 13  | 8   | 1.451056064110 | 5.97396881e+00 | -6.85829706e-01 | 1.14505521e-01  | 3.23171704e+02 | 1.00000000e+01  | 1.00000000e+00  |
| 13  | 9   | 2.884459770445 | 9.71784013e+00 | -7.05586633e-01 | 1.57297268e-01  | 4.93607997e+02 | 9.99999853e+00  | 9.99997723e+00  |
| 13  | 10  | 7.440228234275 | 2.00000000e+01 | -9.63832064e-01 | 2.32591144e-01  | 3.08377833e-06 | 1.66390642e+01  | 6.54469593e+00  |

continued on next page

| $a$ | $b$ | $\alpha_{ab}$  | $\beta_{ab}$   | $a_1^{ab}$      | $a_2^{ab}$      | $C_6^{ab}$     | $\delta_1^{ab}$ | $\delta_6^{ab}$ |
|-----|-----|----------------|----------------|-----------------|-----------------|----------------|-----------------|-----------------|
| 13  | 11  | 2.485706653183 | 7.69276945e+00 | -5.41966678e-01 | -1.13733169e-03 | 2.13427762e-07 | 2.35438038e+01  | 1.02411815e+00  |
| 13  | 12  | 2.336591493754 | 7.10887211e+00 | -1.12738341e+00 | 3.26357332e-01  | 3.79346193e-04 | 4.23713827e+00  | 9.99999484e+00  |
| 13  | 13  | 5.305381200770 | 1.54419194e+01 | -1.03602808e+00 | 2.67686903e-01  | 6.36066417e+02 | 4.30167557e+00  | 1.95680060e+00  |

## V. ASYMPTOTIC PROPERTIES

Asymptotic properties were generated in the aug-cc-pVDZ basis set using the PBE0 functional and with the asymptotic correction of Grüning *et al.* [2]. The ionization potential needed for the asymptotic correction was equal to 0.373 hartree. The calculation of the asymptotic constants was performed with the help of programs DISPER and INDUCT from the POLCOR suite by Wormer and Hettema [3].

### A. Multipole moments

Cosine-type, Kohn-Sham tesseral multipole moments  $Q_{L,M}(C)$  of RDX (in atomic units). The RDX molecule was oriented as given in Sec. II. Definition of tesseral moments in terms of spherical moments  $Y_{L,M}$ :

$$M = 0 : \quad Q_{L,0} = Y_{L,0} \quad (1)$$

$$M > 0 : \quad Q_{L,M}(C) = \left[ (-1)^M Y_{L,M} + Y_{L,-M} \right] / \sqrt{2}$$

$$Q_{L,M}(S) = i \left[ -(-1)^M Y_{L,M} + Y_{L,-M} \right] / \sqrt{2} \quad (2)$$

$$(3)$$

Note that the sine-type moments  $Q_{L,M}(S)$  vanish for molecules with a symmetry plane containing the  $z$  axis which is the case for the orientation given in Sec. II.

TABLE VI: Cosine-type Tesseral multipole moments  $Q_{L,M}(C)$  of RDX (in atomic units).

| $L$ | $M$ | $Q_{L,M}(C)$ <i>ab initio</i> | $Q_{L,M}(C)$ from fitted charges |
|-----|-----|-------------------------------|----------------------------------|
| 1   | 0   | -2.583857705263982            | -2.57686                         |
| 1   | 1   | 1.076097226623206             | 1.11922                          |
| 2   | 0   | 9.888147447590860             | 10.1787                          |
| 2   | 1   | -8.560450366997451            | -8.86139                         |
| 2   | 2   | -3.835421505177980            | -3.75613                         |
| 3   | 0   | 30.85176867527812             | 38.4182                          |
| 3   | 1   | -69.88032700848636            | -73.4139                         |
| 3   | 2   | 37.67999556405224             | 22.5488                          |
| 3   | 3   | 52.22995758110859             | 32.7768                          |
| 4   | 0   | 49.26709557379166             | 16.2947                          |
| 4   | 1   | 275.7386355472727             | 322.904                          |
| 4   | 2   | 294.1957458465710             | 163.231                          |
| 4   | 3   | -136.4176385176542            | -249.214                         |
| 4   | 4   | -22.73143513015402            | 31.4202                          |
| 5   | 0   | 936.1817174673438             | 521.216                          |
| 5   | 1   | 2839.019233968930             | 2858.01                          |
| 5   | 2   | -1451.888308402334            | -1370.31                         |
| 5   | 3   | 84.03336473350873             | -26.0751                         |
| 5   | 4   | -852.7051011009819            | -989.052                         |
| 5   | 5   | 503.7352405771539             | 282.001                          |
| 6   | 0   | -5778.644878574909            | -6424.59                         |
| 6   | 1   | -6140.680949550553            | -6646.37                         |
| 6   | 2   | -11652.93766249875            | -8213.52                         |
| 6   | 3   | 9147.977653555488             | 4595.6                           |
| 6   | 4   | 12949.61055345970             | 5998.12                          |
| 6   | 5   | 11543.52559957751             | 16304                            |
| 6   | 6   | 24437.87488342221             | 30756.3                          |
| 7   | 0   | -59875.69970129905            | -61302.5                         |
| 7   | 1   | -71911.39974293990            | -72047.7                         |
| 7   | 2   | 58903.36590811219             | 73829.5                          |
| 7   | 3   | 15454.48903737853             | 14117.8                          |
| 7   | 4   | -4796.574833656005            | 14524                            |
| 7   | 5   | -19235.16019203208            | 60482.1                          |

continued on next page

| <i>Multipole moments continued from previous page</i> |     |                               |                                  |
|-------------------------------------------------------|-----|-------------------------------|----------------------------------|
| $L$                                                   | $M$ | $Q_{L,M}(C)$ <i>ab initio</i> | $Q_{L,M}(C)$ from fitted charges |
| 7                                                     | 6   | 39162.44188646079             | 42938.3                          |
| 7                                                     | 7   | -27586.22148465354            | -66306.1                         |

## B. Induction and dispersion asymptotic coefficients

Induction and dispersion asymptotic coefficients obtained from coupled Kohn-Sham polarizabilities and Kohn-Sham multipole moments.

The asymptotic induction or dispersion energy is given by

$$\sum_{L_A, K_A, L_B, K_B, L, N} C_{L_A, K_A, L_B, K_B, L}^N A_{L_A, K_A, L_B, K_B, L} * R^{-N} \quad (4)$$

where  $L_A$ ,  $K_A$ ,  $L_B$ ,  $K_B$ , and  $L$  are indices of the angular functions  $A_{L_A, K_A, L_B, K_B, L}$  depending on the Euler angles of the monomers and the orientation of the vector connecting the centers of mass of the monomers, all defined in laboratory frame. For more information, see Ref. 4.

Values up to  $N = 8$  are given. Parameters for  $9 \leq N \leq 12$  can be obtained from the authors.

TABLE VII: Induction asymptotic coefficients of RDX (in atomic units).

| $L_A$ | $K_A$ | $L_B$ | $K_B$ | $L$ | $N$ | $C_{L_A, K_A, L_B, K_B, L}^N$ |
|-------|-------|-------|-------|-----|-----|-------------------------------|
| 0     | 0     | 0     | 0     | 0   | 6   | 0.17074880E+04                |
| 0     | 0     | 2     | 0     | 2   | 6   | 0.13674926E+04                |
| 0     | 0     | 2     | 1     | 2   | 6   | 0.76952330E+03                |
| 0     | 0     | 2     | -1    | 2   | 6   | -0.76952330E+03               |
| 0     | 0     | 2     | 2     | 2   | 6   | 0.21830144E+03                |
| 0     | 0     | 2     | -2    | 2   | 6   | 0.21830144E+03                |
| 2     | 0     | 0     | 0     | 2   | 6   | 0.13674926E+04                |
| 2     | 0     | 2     | 0     | 0   | 6   | -0.36821440E+02               |
| 2     | 0     | 2     | 0     | 2   | 6   | -0.98409460E+02               |
| 2     | 0     | 2     | 0     | 4   | 6   | -0.10628222E+04               |
| 2     | 0     | 2     | 1     | 0   | 6   | -0.19666282E+02               |
| 2     | 0     | 2     | -1    | 0   | 6   | 0.19666282E+02                |
| 2     | 0     | 2     | 1     | 2   | 6   | -0.52560350E+02               |
| 2     | 0     | 2     | -1    | 2   | 6   | 0.52560350E+02                |
| 2     | 0     | 2     | 1     | 4   | 6   | -0.56765180E+03               |
| 2     | 0     | 2     | -1    | 4   | 6   | 0.56765180E+03                |
| 2     | 0     | 2     | 2     | 0   | 6   | 0.49422540E+01                |
| 2     | 0     | 2     | -2    | 0   | 6   | 0.49422540E+01                |
| 2     | 0     | 2     | 2     | 2   | 6   | 0.13208728E+02                |
| 2     | 0     | 2     | -2    | 2   | 6   | 0.13208728E+02                |
| 2     | 0     | 2     | 2     | 4   | 6   | 0.14265428E+03                |
| 2     | 0     | 2     | -2    | 4   | 6   | 0.14265428E+03                |
| 2     | 1     | 0     | 0     | 2   | 6   | 0.76952330E+03                |
| 2     | -1    | 0     | 0     | 2   | 6   | -0.76952330E+03               |
| 2     | 1     | 2     | 0     | 0   | 6   | -0.19666282E+02               |
| 2     | -1    | 2     | 0     | 0   | 6   | 0.19666282E+02                |
| 2     | 1     | 2     | 0     | 2   | 6   | -0.52560350E+02               |
| 2     | -1    | 2     | 0     | 2   | 6   | 0.52560350E+02                |
| 2     | 1     | 2     | 0     | 4   | 6   | -0.56765180E+03               |
| 2     | -1    | 2     | 0     | 4   | 6   | 0.56765180E+03                |
| 2     | 1     | 2     | 1     | 0   | 6   | -0.10481802E+02               |
| 2     | 1     | 2     | -1    | 0   | 6   | 0.10481802E+02                |
| 2     | -1    | 2     | 1     | 0   | 6   | 0.10481802E+02                |
| 2     | -1    | 2     | -1    | 0   | 6   | -0.10481802E+02               |
| 2     | 1     | 2     | 1     | 2   | 6   | -0.28013800E+02               |
| 2     | 1     | 2     | -1    | 2   | 6   | 0.28013800E+02                |
| 2     | -1    | 2     | 1     | 2   | 6   | 0.28013800E+02                |
| 2     | -1    | 2     | -1    | 2   | 6   | -0.28013800E+02               |
| 2     | 1     | 2     | 1     | 4   | 6   | -0.30254900E+03               |
| 2     | 1     | 2     | -1    | 4   | 6   | 0.30254900E+03                |
| 2     | -1    | 2     | 1     | 4   | 6   | 0.30254900E+03                |
| 2     | -1    | 2     | -1    | 4   | 6   | -0.30254900E+03               |
| 2     | 1     | 2     | 2     | 0   | 6   | 0.28647790E+01                |
| 2     | 1     | 2     | -2    | 0   | 6   | 0.28647790E+01                |

*continued on next page*

| $L_A$ | $K_A$ | $L_B$ | $K_B$ | $L$ | $N$ | $C_{L_A, K_A, L_B, K_B, L}^N$ |
|-------|-------|-------|-------|-----|-----|-------------------------------|
| 2     | -1    | 2     | 2     | 0   | 6   | -0.28647790E+01               |
| 2     | -1    | 2     | -2    | 0   | 6   | -0.28647790E+01               |
| 2     | 1     | 2     | 2     | 2   | 6   | 0.76564490E+01                |
| 2     | 1     | 2     | -2    | 2   | 6   | 0.76564490E+01                |
| 2     | -1    | 2     | 2     | 2   | 6   | -0.76564490E+01               |
| 2     | -1    | 2     | -2    | 2   | 6   | -0.76564490E+01               |
| 2     | 1     | 2     | 2     | 4   | 6   | 0.82689620E+02                |
| 2     | 1     | 2     | -2    | 4   | 6   | 0.82689620E+02                |
| 2     | -1    | 2     | 2     | 4   | 6   | -0.82689620E+02               |
| 2     | -1    | 2     | -2    | 4   | 6   | -0.82689620E+02               |
| 2     | 2     | 0     | 0     | 2   | 6   | 0.21830144E+03                |
| 2     | -2    | 0     | 0     | 2   | 6   | 0.21830144E+03                |
| 2     | 2     | 2     | 0     | 0   | 6   | 0.49422540E+01                |
| 2     | -2    | 2     | 0     | 0   | 6   | 0.49422540E+01                |
| 2     | 2     | 2     | 0     | 2   | 6   | 0.13208728E+02                |
| 2     | -2    | 2     | 0     | 2   | 6   | 0.13208728E+02                |
| 2     | 2     | 2     | 0     | 4   | 6   | 0.14265428E+03                |
| 2     | -2    | 2     | 0     | 4   | 6   | 0.14265428E+03                |
| 2     | 2     | 2     | 1     | 0   | 6   | 0.28647790E+01                |
| 2     | 2     | 2     | -1    | 0   | 6   | -0.28647790E+01               |
| 2     | -2    | 2     | 1     | 0   | 6   | 0.28647790E+01                |
| 2     | -2    | 2     | -1    | 0   | 6   | -0.28647790E+01               |
| 2     | 2     | 2     | 1     | 2   | 6   | 0.76564490E+01                |
| 2     | 2     | 2     | -1    | 2   | 6   | -0.76564490E+01               |
| 2     | -2    | 2     | 1     | 2   | 6   | 0.76564490E+01                |
| 2     | -2    | 2     | -1    | 2   | 6   | -0.76564490E+01               |
| 2     | 2     | 2     | 1     | 4   | 6   | 0.82689620E+02                |
| 2     | 2     | 2     | -1    | 4   | 6   | -0.82689620E+02               |
| 2     | -2    | 2     | 1     | 4   | 6   | 0.82689620E+02                |
| 2     | -2    | 2     | -1    | 4   | 6   | -0.82689620E+02               |
| 2     | 2     | 2     | 2     | 0   | 6   | 0.16476006E+01                |
| 2     | 2     | 2     | -2    | 0   | 6   | 0.16476006E+01                |
| 2     | -2    | 2     | 2     | 0   | 6   | 0.16476006E+01                |
| 2     | -2    | 2     | -2    | 0   | 6   | 0.16476006E+01                |
| 2     | 2     | 2     | 2     | 2   | 6   | 0.44033980E+01                |
| 2     | 2     | 2     | -2    | 2   | 6   | 0.44033980E+01                |
| 2     | -2    | 2     | 2     | 2   | 6   | 0.44033980E+01                |
| 2     | -2    | 2     | -2    | 2   | 6   | 0.44033980E+01                |
| 2     | 2     | 2     | 2     | 4   | 6   | 0.47556700E+02                |
| 2     | 2     | 2     | -2    | 4   | 6   | 0.47556700E+02                |
| 2     | -2    | 2     | 2     | 4   | 6   | 0.47556700E+02                |
| 2     | -2    | 2     | -2    | 4   | 6   | 0.47556700E+02                |
| 0     | 0     | 1     | 0     | 1   | 7   | -0.24681836E+05               |
| 0     | 0     | 1     | 1     | 1   | 7   | -0.46661417E+04               |
| 0     | 0     | 1     | -1    | 1   | 7   | 0.46661417E+04                |
| 0     | 0     | 3     | 0     | 3   | 7   | -0.16231765E+05               |
| 0     | 0     | 3     | 1     | 3   | 7   | -0.17591927E+05               |
| 0     | 0     | 3     | -1    | 3   | 7   | 0.17591927E+05                |
| 0     | 0     | 3     | 2     | 3   | 7   | -0.26382560E+03               |
| 0     | 0     | 3     | -2    | 3   | 7   | -0.26382560E+03               |
| 0     | 0     | 3     | 3     | 3   | 7   | 0.60513700E+03                |
| 0     | 0     | 3     | -3    | 3   | 7   | -0.60513700E+03               |
| 1     | 0     | 0     | 0     | 1   | 7   | 0.24681836E+05                |
| 1     | 0     | 2     | 0     | 1   | 7   | -0.21268600E+02               |
| 1     | 0     | 2     | 0     | 3   | 7   | 0.10610600E+03                |
| 1     | 0     | 2     | 1     | 1   | 7   | -0.33665300E+02               |
| 1     | 0     | 2     | -1    | 1   | 7   | 0.33665300E+02                |
| 1     | 0     | 2     | 1     | 3   | 7   | 0.16795200E+03                |
| 1     | 0     | 2     | -1    | 3   | 7   | -0.16795200E+03               |
| 1     | 0     | 2     | 2     | 1   | 7   | -0.22611564E+03               |
| 1     | 0     | 2     | -2    | 1   | 7   | -0.22611564E+03               |
| 1     | 0     | 2     | 2     | 3   | 7   | 0.11280633E+04                |
| 1     | 0     | 2     | -2    | 3   | 7   | 0.11280633E+04                |
| 1     | 1     | 0     | 0     | 1   | 7   | 0.46661417E+04                |
| 1     | -1    | 0     | 0     | 1   | 7   | -0.46661417E+04               |
| 1     | 1     | 2     | 0     | 1   | 7   | 0.16158046E+03                |

continued on next page

Induction coefficients continued from previous page

| $L_A$ | $K_A$ | $L_B$ | $K_B$ | $L$ | $N$ | $C_{L_A, K_A, L_B, K_B, L}^N$ |
|-------|-------|-------|-------|-----|-----|-------------------------------|
| 1     | -1    | 2     | 0     | 1   | 7   | -0.16158046E+03               |
| 1     | 1     | 2     | 0     | 3   | 7   | -0.80610490E+03               |
| 1     | -1    | 2     | 0     | 3   | 7   | 0.80610490E+03                |
| 1     | 1     | 2     | 1     | 1   | 7   | 0.85528470E+02                |
| 1     | 1     | 2     | -1    | 1   | 7   | -0.85528470E+02               |
| 1     | -1    | 2     | 1     | 1   | 7   | -0.85528470E+02               |
| 1     | -1    | 2     | -1    | 1   | 7   | 0.85528470E+02                |
| 1     | 1     | 2     | 1     | 3   | 7   | -0.42669100E+03               |
| 1     | 1     | 2     | -1    | 3   | 7   | 0.42669100E+03                |
| 1     | -1    | 2     | 1     | 3   | 7   | 0.42669100E+03                |
| 1     | -1    | 2     | -1    | 3   | 7   | -0.42669100E+03               |
| 1     | 1     | 2     | 2     | 1   | 7   | -0.29606340E+02               |
| 1     | 1     | 2     | -2    | 1   | 7   | -0.29606340E+02               |
| 1     | -1    | 2     | 2     | 1   | 7   | 0.29606340E+02                |
| 1     | -1    | 2     | -2    | 1   | 7   | 0.29606340E+02                |
| 1     | 1     | 2     | 2     | 3   | 7   | 0.14770232E+03                |
| 1     | 1     | 2     | -2    | 3   | 7   | 0.14770232E+03                |
| 1     | -1    | 2     | 2     | 3   | 7   | -0.14770232E+03               |
| 1     | -1    | 2     | -2    | 3   | 7   | -0.14770232E+03               |
| 2     | 0     | 1     | 0     | 1   | 7   | 0.21268600E+02                |
| 2     | 0     | 1     | 0     | 3   | 7   | -0.10610600E+03               |
| 2     | 0     | 1     | 1     | 1   | 7   | -0.16158046E+03               |
| 2     | 0     | 1     | -1    | 1   | 7   | 0.16158046E+03                |
| 2     | 0     | 1     | 1     | 3   | 7   | 0.80610490E+03                |
| 2     | 0     | 1     | -1    | 3   | 7   | -0.80610490E+03               |
| 2     | 0     | 2     | 1     | 1   | 7   | -0.77053200E+02               |
| 2     | 0     | 2     | -1    | 1   | 7   | -0.77053200E+02               |
| 2     | 0     | 2     | 1     | 3   | 7   | -0.15693420E+03               |
| 2     | 0     | 2     | -1    | 3   | 7   | -0.15693420E+03               |
| 2     | 0     | 2     | 2     | 1   | 7   | -0.28714040E+03               |
| 2     | 0     | 2     | -2    | 1   | 7   | 0.28714040E+03                |
| 2     | 0     | 2     | 2     | 3   | 7   | -0.58481900E+03               |
| 2     | 0     | 2     | -2    | 3   | 7   | 0.58481900E+03                |
| 2     | 0     | 3     | 0     | 1   | 7   | -0.14442930E+03               |
| 2     | 0     | 3     | 0     | 3   | 7   | -0.33700180E+03               |
| 2     | 0     | 3     | 0     | 5   | 7   | -0.56452790E+04               |
| 2     | 0     | 3     | 1     | 1   | 7   | -0.19022750E+03               |
| 2     | 0     | 3     | -1    | 1   | 7   | 0.19022750E+03                |
| 2     | 0     | 3     | 1     | 3   | 7   | -0.44386400E+03               |
| 2     | 0     | 3     | -1    | 3   | 7   | 0.44386400E+03                |
| 2     | 0     | 3     | 1     | 5   | 7   | -0.74353820E+04               |
| 2     | 0     | 3     | -1    | 5   | 7   | 0.74353820E+04                |
| 2     | 0     | 3     | 2     | 1   | 7   | -0.69600569E+02               |
| 2     | 0     | 3     | -2    | 1   | 7   | -0.69600569E+02               |
| 2     | 0     | 3     | 2     | 3   | 7   | -0.16240137E+03               |
| 2     | 0     | 3     | -2    | 3   | 7   | -0.16240137E+03               |
| 2     | 0     | 3     | 2     | 5   | 7   | -0.27204635E+04               |
| 2     | 0     | 3     | -2    | 5   | 7   | -0.27204635E+04               |
| 2     | 0     | 3     | 3     | 1   | 7   | -0.17893662E+03               |
| 2     | 0     | 3     | -3    | 1   | 7   | 0.17893662E+03                |
| 2     | 0     | 3     | 3     | 3   | 7   | -0.41751885E+03               |
| 2     | 0     | 3     | -3    | 3   | 7   | 0.41751885E+03                |
| 2     | 0     | 3     | 3     | 5   | 7   | -0.69940598E+04               |
| 2     | 0     | 3     | -3    | 5   | 7   | 0.69940598E+04                |
| 2     | 1     | 1     | 0     | 1   | 7   | 0.33665300E+02                |
| 2     | -1    | 1     | 0     | 1   | 7   | -0.33665300E+02               |
| 2     | 1     | 1     | 0     | 3   | 7   | -0.16795200E+03               |
| 2     | -1    | 1     | 0     | 3   | 7   | 0.16795200E+03                |
| 2     | 1     | 1     | 1     | 1   | 7   | -0.85528470E+02               |
| 2     | 1     | 1     | -1    | 1   | 7   | 0.85528470E+02                |
| 2     | -1    | 1     | 1     | 1   | 7   | 0.85528470E+02                |
| 2     | -1    | 1     | -1    | 1   | 7   | -0.85528470E+02               |
| 2     | 1     | 1     | 1     | 3   | 7   | 0.42669100E+03                |
| 2     | 1     | 1     | -1    | 3   | 7   | -0.42669100E+03               |
| 2     | -1    | 1     | 1     | 3   | 7   | -0.42669100E+03               |
| 2     | -1    | 1     | -1    | 3   | 7   | 0.42669100E+03                |

continued on next page

| $L_A$ | $K_A$ | $L_B$ | $K_B$ | $L$ | $N$ | $C_{L_A, K_A, L_B, K_B, L}^N$ |
|-------|-------|-------|-------|-----|-----|-------------------------------|
| 2     | 1     | 2     | 0     | 1   | 7   | -0.77053200E+02               |
| 2     | -1    | 2     | 0     | 1   | 7   | -0.77053200E+02               |
| 2     | 1     | 2     | 0     | 3   | 7   | -0.15693420E+03               |
| 2     | -1    | 2     | 0     | 3   | 7   | -0.15693420E+03               |
| 2     | 1     | 2     | 1     | 1   | 7   | -0.92054780E+02               |
| 2     | -1    | 2     | -1    | 1   | 7   | 0.92054780E+02                |
| 2     | 1     | 2     | 1     | 3   | 7   | -0.18748798E+03               |
| 2     | -1    | 2     | -1    | 3   | 7   | 0.18748798E+03                |
| 2     | 1     | 2     | -2    | 1   | 7   | 0.10956865E+03                |
| 2     | -1    | 2     | 2     | 1   | 7   | 0.10956865E+03                |
| 2     | 1     | 2     | 2     | 1   | 7   | -0.18893594E+03               |
| 2     | -1    | 2     | -2    | 1   | 7   | -0.18893594E+03               |
| 2     | 1     | 2     | -2    | 3   | 7   | 0.22315850E+03                |
| 2     | -1    | 2     | 2     | 3   | 7   | 0.22315850E+03                |
| 2     | 1     | 2     | 2     | 3   | 7   | -0.38480590E+03               |
| 2     | -1    | 2     | -2    | 3   | 7   | -0.38480590E+03               |
| 2     | 1     | 3     | 0     | 1   | 7   | -0.87691510E+02               |
| 2     | -1    | 3     | 0     | 1   | 7   | 0.87691510E+02                |
| 2     | 1     | 3     | 0     | 3   | 7   | -0.20461350E+03               |
| 2     | -1    | 3     | 0     | 3   | 7   | 0.20461350E+03                |
| 2     | 1     | 3     | 0     | 5   | 7   | -0.34275800E+04               |
| 2     | -1    | 3     | 0     | 5   | 7   | 0.34275800E+04                |
| 2     | 1     | 3     | 1     | 1   | 7   | -0.11373747E+03               |
| 2     | 1     | 3     | -1    | 1   | 7   | 0.11373747E+03                |
| 2     | -1    | 3     | 1     | 1   | 7   | 0.11373747E+03                |
| 2     | -1    | 3     | -1    | 1   | 7   | -0.11373747E+03               |
| 2     | 1     | 3     | 1     | 3   | 7   | -0.26538750E+03               |
| 2     | 1     | 3     | -1    | 3   | 7   | 0.26538750E+03                |
| 2     | -1    | 3     | 1     | 3   | 7   | 0.26538750E+03                |
| 2     | -1    | 3     | -1    | 3   | 7   | -0.26538750E+03               |
| 2     | 1     | 3     | 1     | 5   | 7   | -0.44456340E+04               |
| 2     | 1     | 3     | -1    | 5   | 7   | 0.44456340E+04                |
| 2     | -1    | 3     | 1     | 5   | 7   | 0.44456340E+04                |
| 2     | -1    | 3     | -1    | 5   | 7   | -0.44456340E+04               |
| 2     | 1     | 3     | 2     | 1   | 7   | -0.38744351E+02               |
| 2     | 1     | 3     | -2    | 1   | 7   | -0.38744351E+02               |
| 2     | -1    | 3     | 2     | 1   | 7   | 0.38744351E+02                |
| 2     | -1    | 3     | -2    | 1   | 7   | 0.38744351E+02                |
| 2     | 1     | 3     | 2     | 3   | 7   | -0.90403480E+02               |
| 2     | 1     | 3     | -2    | 3   | 7   | -0.90403480E+02               |
| 2     | -1    | 3     | 2     | 3   | 7   | 0.90403480E+02                |
| 2     | -1    | 3     | -2    | 3   | 7   | 0.90403480E+02                |
| 2     | 1     | 3     | 2     | 5   | 7   | -0.15143930E+04               |
| 2     | 1     | 3     | -2    | 5   | 7   | -0.15143930E+04               |
| 2     | -1    | 3     | 2     | 5   | 7   | 0.15143930E+04                |
| 2     | -1    | 3     | -2    | 5   | 7   | 0.15143930E+04                |
| 2     | 1     | 3     | 3     | 1   | 7   | -0.99011429E+02               |
| 2     | 1     | 3     | -3    | 1   | 7   | 0.99011429E+02                |
| 2     | -1    | 3     | 3     | 1   | 7   | 0.99011429E+02                |
| 2     | -1    | 3     | -3    | 1   | 7   | -0.99011429E+02               |
| 2     | 1     | 3     | 3     | 3   | 7   | -0.23102667E+03               |
| 2     | 1     | 3     | -3    | 3   | 7   | 0.23102667E+03                |
| 2     | -1    | 3     | 3     | 3   | 7   | 0.23102667E+03                |
| 2     | -1    | 3     | -3    | 3   | 7   | -0.23102667E+03               |
| 2     | 1     | 3     | 3     | 5   | 7   | -0.38700399E+04               |
| 2     | 1     | 3     | -3    | 5   | 7   | 0.38700399E+04                |
| 2     | -1    | 3     | 3     | 5   | 7   | 0.38700399E+04                |
| 2     | -1    | 3     | -3    | 5   | 7   | -0.38700399E+04               |
| 2     | 2     | 1     | 0     | 1   | 7   | 0.22611564E+03                |
| 2     | -2    | 1     | 0     | 1   | 7   | 0.22611564E+03                |
| 2     | 2     | 1     | 0     | 3   | 7   | -0.11280633E+04               |
| 2     | -2    | 1     | 0     | 3   | 7   | -0.11280633E+04               |
| 2     | 2     | 1     | 1     | 1   | 7   | 0.29606340E+02                |
| 2     | 2     | 1     | -1    | 1   | 7   | -0.29606340E+02               |
| 2     | -2    | 1     | 1     | 1   | 7   | 0.29606340E+02                |
| 2     | -2    | 1     | -1    | 1   | 7   | -0.29606340E+02               |

continued on next page

| $L_A$ | $K_A$ | $L_B$ | $K_B$ | $L$ | $N$ | $C_{L_A, K_A, L_B, K_B, L}^N$ |
|-------|-------|-------|-------|-----|-----|-------------------------------|
| 2     | 2     | 1     | 1     | 3   | 7   | -0.14770232E+03               |
| 2     | 2     | 1     | -1    | 3   | 7   | 0.14770232E+03                |
| 2     | -2    | 1     | 1     | 3   | 7   | -0.14770232E+03               |
| 2     | -2    | 1     | -1    | 3   | 7   | 0.14770232E+03                |
| 2     | 2     | 2     | 0     | 1   | 7   | -0.28714040E+03               |
| 2     | -2    | 2     | 0     | 1   | 7   | 0.28714040E+03                |
| 2     | 2     | 2     | 0     | 3   | 7   | -0.58481900E+03               |
| 2     | -2    | 2     | 0     | 3   | 7   | 0.58481900E+03                |
| 2     | 2     | 2     | -1    | 1   | 7   | 0.10956865E+03                |
| 2     | -2    | 2     | 1     | 1   | 7   | 0.10956865E+03                |
| 2     | 2     | 2     | 1     | 1   | 7   | -0.18893594E+03               |
| 2     | -2    | 2     | -1    | 1   | 7   | -0.18893594E+03               |
| 2     | 2     | 2     | -1    | 3   | 7   | 0.22315850E+03                |
| 2     | -2    | 2     | 1     | 3   | 7   | 0.22315850E+03                |
| 2     | 2     | 2     | 1     | 3   | 7   | -0.38480590E+03               |
| 2     | -2    | 2     | -1    | 3   | 7   | -0.38480590E+03               |
| 2     | 2     | 2     | 2     | 1   | 7   | 0.16143960E+03                |
| 2     | -2    | 2     | -2    | 1   | 7   | -0.16143960E+03               |
| 2     | 2     | 2     | 2     | 3   | 7   | 0.32880400E+03                |
| 2     | -2    | 2     | -2    | 3   | 7   | -0.32880400E+03               |
| 2     | 2     | 3     | 0     | 1   | 7   | -0.88931180E+02               |
| 2     | -2    | 3     | 0     | 1   | 7   | -0.88931180E+02               |
| 2     | 2     | 3     | 0     | 3   | 7   | -0.20750609E+03               |
| 2     | -2    | 3     | 0     | 3   | 7   | -0.20750609E+03               |
| 2     | 2     | 3     | 0     | 5   | 7   | -0.34760350E+04               |
| 2     | -2    | 3     | 0     | 5   | 7   | -0.34760350E+04               |
| 2     | 2     | 3     | 1     | 1   | 7   | -0.99057170E+02               |
| 2     | 2     | 3     | -1    | 1   | 7   | 0.99057170E+02                |
| 2     | -2    | 3     | 1     | 1   | 7   | -0.99057170E+02               |
| 2     | -2    | 3     | -1    | 1   | 7   | 0.99057170E+02                |
| 2     | 2     | 3     | 1     | 3   | 7   | -0.23113337E+03               |
| 2     | 2     | 3     | -1    | 3   | 7   | 0.23113337E+03                |
| 2     | -2    | 3     | 1     | 3   | 7   | -0.23113337E+03               |
| 2     | -2    | 3     | -1    | 3   | 7   | 0.23113337E+03                |
| 2     | 2     | 3     | 1     | 5   | 7   | -0.38718270E+04               |
| 2     | 2     | 3     | -1    | 5   | 7   | 0.38718270E+04                |
| 2     | -2    | 3     | 1     | 5   | 7   | -0.38718270E+04               |
| 2     | -2    | 3     | -1    | 5   | 7   | 0.38718270E+04                |
| 2     | 2     | 3     | 2     | 1   | 7   | -0.67822860E+01               |
| 2     | 2     | 3     | -2    | 1   | 7   | -0.67822860E+01               |
| 2     | -2    | 3     | 2     | 1   | 7   | -0.67822860E+01               |
| 2     | -2    | 3     | -2    | 1   | 7   | -0.67822860E+01               |
| 2     | 2     | 3     | 2     | 3   | 7   | -0.15825333E+02               |
| 2     | 2     | 3     | -2    | 3   | 7   | -0.15825333E+02               |
| 2     | -2    | 3     | 2     | 3   | 7   | -0.15825333E+02               |
| 2     | -2    | 3     | -2    | 3   | 7   | -0.15825333E+02               |
| 2     | 2     | 3     | 2     | 5   | 7   | -0.26509786E+03               |
| 2     | 2     | 3     | -2    | 5   | 7   | -0.26509786E+03               |
| 2     | -2    | 3     | 2     | 5   | 7   | -0.26509786E+03               |
| 2     | -2    | 3     | -2    | 5   | 7   | -0.26509786E+03               |
| 2     | 2     | 3     | 3     | 1   | 7   | -0.11311251E+02               |
| 2     | 2     | 3     | -3    | 1   | 7   | 0.11311251E+02                |
| 2     | -2    | 3     | 3     | 1   | 7   | -0.11311251E+02               |
| 2     | -2    | 3     | -3    | 1   | 7   | 0.11311251E+02                |
| 2     | 2     | 3     | 3     | 3   | 7   | -0.26392920E+02               |
| 2     | 2     | 3     | -3    | 3   | 7   | 0.26392920E+02                |
| 2     | -2    | 3     | 3     | 3   | 7   | -0.26392920E+02               |
| 2     | -2    | 3     | -3    | 3   | 7   | 0.26392920E+02                |
| 2     | 2     | 3     | 3     | 5   | 7   | -0.44212050E+03               |
| 2     | 2     | 3     | -3    | 5   | 7   | 0.44212050E+03                |
| 2     | -2    | 3     | 3     | 5   | 7   | -0.44212050E+03               |
| 2     | -2    | 3     | -3    | 5   | 7   | 0.44212050E+03                |
| 3     | 0     | 0     | 0     | 3   | 7   | 0.16231765E+05                |
| 3     | 0     | 2     | 0     | 1   | 7   | 0.14442930E+03                |
| 3     | 0     | 2     | 0     | 3   | 7   | 0.33700180E+03                |
| 3     | 0     | 2     | 0     | 5   | 7   | 0.56452790E+04                |

continued on next page

Induction coefficients continued from previous page

| $L_A$ | $K_A$ | $L_B$ | $K_B$ | $L$ | $N$ | $C_{L_A, K_A, L_B, K_B, L}^N$ |
|-------|-------|-------|-------|-----|-----|-------------------------------|
| 3     | 0     | 2     | 1     | 1   | 7   | 0.87691510E+02                |
| 3     | 0     | 2     | -1    | 1   | 7   | -0.87691510E+02               |
| 3     | 0     | 2     | 1     | 3   | 7   | 0.20461350E+03                |
| 3     | 0     | 2     | -1    | 3   | 7   | -0.20461350E+03               |
| 3     | 0     | 2     | 1     | 5   | 7   | 0.34275800E+04                |
| 3     | 0     | 2     | -1    | 5   | 7   | -0.34275800E+04               |
| 3     | 0     | 2     | 2     | 1   | 7   | 0.88931180E+02                |
| 3     | 0     | 2     | -2    | 1   | 7   | 0.88931180E+02                |
| 3     | 0     | 2     | 2     | 3   | 7   | 0.20750609E+03                |
| 3     | 0     | 2     | -2    | 3   | 7   | 0.20750609E+03                |
| 3     | 0     | 2     | 2     | 5   | 7   | 0.34760350E+04                |
| 3     | 0     | 2     | -2    | 5   | 7   | 0.34760350E+04                |
| 3     | 1     | 0     | 0     | 3   | 7   | 0.17591927E+05                |
| 3     | -1    | 0     | 0     | 3   | 7   | -0.17591927E+05               |
| 3     | 1     | 2     | 0     | 1   | 7   | 0.19022750E+03                |
| 3     | -1    | 2     | 0     | 1   | 7   | -0.19022750E+03               |
| 3     | 1     | 2     | 0     | 3   | 7   | 0.44386400E+03                |
| 3     | -1    | 2     | 0     | 3   | 7   | -0.44386400E+03               |
| 3     | 1     | 2     | 0     | 5   | 7   | 0.74353820E+04                |
| 3     | -1    | 2     | 0     | 5   | 7   | -0.74353820E+04               |
| 3     | 1     | 2     | 1     | 1   | 7   | 0.11373747E+03                |
| 3     | 1     | 2     | -1    | 1   | 7   | -0.11373747E+03               |
| 3     | -1    | 2     | 1     | 1   | 7   | -0.11373747E+03               |
| 3     | -1    | 2     | -1    | 1   | 7   | 0.11373747E+03                |
| 3     | 1     | 2     | 1     | 3   | 7   | 0.26538750E+03                |
| 3     | 1     | 2     | -1    | 3   | 7   | -0.26538750E+03               |
| 3     | -1    | 2     | 1     | 3   | 7   | -0.26538750E+03               |
| 3     | -1    | 2     | -1    | 3   | 7   | 0.26538750E+03                |
| 3     | 1     | 2     | 1     | 5   | 7   | 0.44456340E+04                |
| 3     | 1     | 2     | -1    | 5   | 7   | -0.44456340E+04               |
| 3     | -1    | 2     | 1     | 5   | 7   | -0.44456340E+04               |
| 3     | -1    | 2     | -1    | 5   | 7   | 0.44456340E+04                |
| 3     | 1     | 2     | 2     | 1   | 7   | 0.99057170E+02                |
| 3     | 1     | 2     | -2    | 1   | 7   | 0.99057170E+02                |
| 3     | -1    | 2     | 2     | 1   | 7   | -0.99057170E+02               |
| 3     | -1    | 2     | -2    | 1   | 7   | -0.99057170E+02               |
| 3     | 1     | 2     | 2     | 3   | 7   | 0.23113337E+03                |
| 3     | 1     | 2     | -2    | 3   | 7   | 0.23113337E+03                |
| 3     | -1    | 2     | 2     | 3   | 7   | -0.23113337E+03               |
| 3     | -1    | 2     | -2    | 3   | 7   | -0.23113337E+03               |
| 3     | 1     | 2     | 2     | 5   | 7   | 0.38718270E+04                |
| 3     | 1     | 2     | -2    | 5   | 7   | 0.38718270E+04                |
| 3     | -1    | 2     | 2     | 5   | 7   | -0.38718270E+04               |
| 3     | -1    | 2     | -2    | 5   | 7   | -0.38718270E+04               |
| 3     | 2     | 0     | 0     | 3   | 7   | 0.26382560E+03                |
| 3     | -2    | 0     | 0     | 3   | 7   | 0.26382560E+03                |
| 3     | 2     | 2     | 0     | 1   | 7   | 0.69600569E+02                |
| 3     | -2    | 2     | 0     | 1   | 7   | 0.69600569E+02                |
| 3     | 2     | 2     | 0     | 3   | 7   | 0.16240137E+03                |
| 3     | -2    | 2     | 0     | 3   | 7   | 0.16240137E+03                |
| 3     | 2     | 2     | 0     | 5   | 7   | 0.27204635E+04                |
| 3     | -2    | 2     | 0     | 5   | 7   | 0.27204635E+04                |
| 3     | 2     | 2     | 1     | 1   | 7   | 0.38744351E+02                |
| 3     | 2     | 2     | -1    | 1   | 7   | -0.38744351E+02               |
| 3     | -2    | 2     | 1     | 1   | 7   | 0.38744351E+02                |
| 3     | -2    | 2     | -1    | 1   | 7   | -0.38744351E+02               |
| 3     | 2     | 2     | 1     | 3   | 7   | 0.90403480E+02                |
| 3     | 2     | 2     | -1    | 3   | 7   | -0.90403480E+02               |
| 3     | -2    | 2     | 1     | 3   | 7   | 0.90403480E+02                |
| 3     | -2    | 2     | -1    | 3   | 7   | -0.90403480E+02               |
| 3     | 2     | 2     | 1     | 5   | 7   | 0.15143930E+04                |
| 3     | 2     | 2     | -1    | 5   | 7   | -0.15143930E+04               |
| 3     | -2    | 2     | 1     | 5   | 7   | 0.15143930E+04                |
| 3     | -2    | 2     | -1    | 5   | 7   | -0.15143930E+04               |
| 3     | 2     | 2     | 2     | 1   | 7   | 0.67822860E+01                |
| 3     | 2     | 2     | -2    | 1   | 7   | 0.67822860E+01                |

continued on next page

| $L_A$ | $K_A$ | $L_B$ | $K_B$ | $L$ | $N$ | $C_{L_A, K_A, L_B, K_B, L}^N$ |
|-------|-------|-------|-------|-----|-----|-------------------------------|
| 3     | -2    | 2     | 2     | 1   | 7   | 0.67822860E+01                |
| 3     | -2    | 2     | -2    | 1   | 7   | 0.67822860E+01                |
| 3     | 2     | 2     | 2     | 3   | 7   | 0.15825333E+02                |
| 3     | 2     | 2     | -2    | 3   | 7   | 0.15825333E+02                |
| 3     | -2    | 2     | 2     | 3   | 7   | 0.15825333E+02                |
| 3     | -2    | 2     | -2    | 3   | 7   | 0.15825333E+02                |
| 3     | 2     | 2     | 2     | 5   | 7   | 0.26509786E+03                |
| 3     | 2     | 2     | -2    | 5   | 7   | 0.26509786E+03                |
| 3     | -2    | 2     | 2     | 5   | 7   | 0.26509786E+03                |
| 3     | -2    | 2     | -2    | 5   | 7   | 0.26509786E+03                |
| 3     | 3     | 0     | 0     | 3   | 7   | -0.60513700E+03               |
| 3     | -3    | 0     | 0     | 3   | 7   | 0.60513700E+03                |
| 3     | 3     | 2     | 0     | 1   | 7   | 0.17893662E+03                |
| 3     | -3    | 2     | 0     | 1   | 7   | -0.17893662E+03               |
| 3     | 3     | 2     | 0     | 3   | 7   | 0.41751885E+03                |
| 3     | -3    | 2     | 0     | 3   | 7   | -0.41751885E+03               |
| 3     | 3     | 2     | 0     | 5   | 7   | 0.69940598E+04                |
| 3     | -3    | 2     | 0     | 5   | 7   | -0.69940598E+04               |
| 3     | 3     | 2     | 1     | 1   | 7   | 0.99011429E+02                |
| 3     | 3     | 2     | -1    | 1   | 7   | -0.99011429E+02               |
| 3     | -3    | 2     | 1     | 1   | 7   | -0.99011429E+02               |
| 3     | -3    | 2     | -1    | 1   | 7   | 0.99011429E+02                |
| 3     | 3     | 2     | 1     | 3   | 7   | 0.23102667E+03                |
| 3     | 3     | 2     | -1    | 3   | 7   | -0.23102667E+03               |
| 3     | -3    | 2     | 1     | 3   | 7   | -0.23102667E+03               |
| 3     | -3    | 2     | -1    | 3   | 7   | 0.23102667E+03                |
| 3     | 3     | 2     | 1     | 5   | 7   | 0.38700399E+04                |
| 3     | 3     | 2     | -1    | 5   | 7   | -0.38700399E+04               |
| 3     | -3    | 2     | 1     | 5   | 7   | -0.38700399E+04               |
| 3     | -3    | 2     | -1    | 5   | 7   | 0.38700399E+04                |
| 3     | 3     | 2     | 2     | 1   | 7   | 0.11311251E+02                |
| 3     | 3     | 2     | -2    | 1   | 7   | 0.11311251E+02                |
| 3     | -3    | 2     | 2     | 1   | 7   | -0.11311251E+02               |
| 3     | -3    | 2     | -2    | 1   | 7   | -0.11311251E+02               |
| 3     | 3     | 2     | 2     | 3   | 7   | 0.26392920E+02                |
| 3     | 3     | 2     | -2    | 3   | 7   | 0.26392920E+02                |
| 3     | -3    | 2     | 2     | 3   | 7   | -0.26392920E+02               |
| 3     | -3    | 2     | -2    | 3   | 7   | -0.26392920E+02               |
| 3     | 3     | 2     | 2     | 5   | 7   | 0.44212050E+03                |
| 3     | 3     | 2     | -2    | 5   | 7   | 0.44212050E+03                |
| 3     | -3    | 2     | 2     | 5   | 7   | -0.44212050E+03               |
| 3     | -3    | 2     | -2    | 5   | 7   | -0.44212050E+03               |
| 0     | 0     | 0     | 0     | 0   | 8   | 0.23949440E+06                |
| 0     | 0     | 2     | 0     | 2   | 8   | -0.14397371E+06               |
| 0     | 0     | 2     | 1     | 2   | 8   | -0.16817329E+06               |
| 0     | 0     | 2     | -1    | 2   | 8   | 0.16817329E+06                |
| 0     | 0     | 2     | 2     | 2   | 8   | 0.91692880E+05                |
| 0     | 0     | 2     | -2    | 2   | 8   | 0.91692880E+05                |
| 0     | 0     | 4     | 0     | 4   | 8   | -0.10578777E+05               |
| 0     | 0     | 4     | 1     | 4   | 8   | -0.52735050E+05               |
| 0     | 0     | 4     | -1    | 4   | 8   | 0.52735050E+05                |
| 0     | 0     | 4     | 2     | 4   | 8   | -0.11082803E+06               |
| 0     | 0     | 4     | -2    | 4   | 8   | -0.11082803E+06               |
| 0     | 0     | 4     | 3     | 4   | 8   | 0.26197750E+05                |
| 0     | 0     | 4     | -3    | 4   | 8   | -0.26197750E+05               |
| 0     | 0     | 4     | 4     | 4   | 8   | 0.42428276E+05                |
| 0     | 0     | 4     | -4    | 4   | 8   | 0.42428276E+05                |
| 1     | 0     | 1     | 0     | 0   | 8   | 0.16262330E+05                |
| 1     | 0     | 1     | 0     | 2   | 8   | -0.82281600E+05               |
| 1     | 0     | 1     | 1     | 0   | 8   | 0.62965600E+03                |
| 1     | 0     | 1     | -1    | 0   | 8   | -0.62965600E+03               |
| 1     | 0     | 1     | 1     | 2   | 8   | -0.31858380E+04               |
| 1     | 0     | 1     | -1    | 2   | 8   | 0.31858380E+04                |
| 1     | 0     | 3     | 0     | 2   | 8   | 0.14490942E+05                |
| 1     | 0     | 3     | 0     | 4   | 8   | -0.74830900E+05               |
| 1     | 0     | 3     | 1     | 2   | 8   | 0.16649063E+05                |

continued on next page

| $L_A$ | $K_A$ | $L_B$ | $K_B$ | $L$ | $N$ | $C_{L_A, K_A, L_B, K_B, L}^N$ |
|-------|-------|-------|-------|-----|-----|-------------------------------|
| 1     | 0     | 3     | -1    | 2   | 8   | -0.16649063E+05               |
| 1     | 0     | 3     | 1     | 4   | 8   | -0.85975400E+05               |
| 1     | 0     | 3     | -1    | 4   | 8   | 0.85975400E+05                |
| 1     | 0     | 3     | 2     | 2   | 8   | 0.21193374E+04                |
| 1     | 0     | 3     | -2    | 2   | 8   | 0.21193374E+04                |
| 1     | 0     | 3     | 2     | 4   | 8   | -0.10944213E+05               |
| 1     | 0     | 3     | -2    | 4   | 8   | -0.10944213E+05               |
| 1     | 0     | 3     | 3     | 2   | 8   | 0.46227304E+04                |
| 1     | 0     | 3     | -3    | 2   | 8   | -0.46227304E+04               |
| 1     | 0     | 3     | 3     | 4   | 8   | -0.23871680E+05               |
| 1     | 0     | 3     | -3    | 4   | 8   | 0.23871680E+05                |
| 1     | 1     | 1     | 0     | 0   | 8   | 0.62965600E+03                |
| 1     | -1    | 1     | 0     | 0   | 8   | -0.62965600E+03               |
| 1     | 1     | 1     | 0     | 2   | 8   | -0.31858380E+04               |
| 1     | -1    | 1     | 0     | 2   | 8   | 0.31858380E+04                |
| 1     | 1     | 1     | 1     | 0   | 8   | -0.48908320E+03               |
| 1     | 1     | 1     | -1    | 0   | 8   | 0.48908320E+03                |
| 1     | -1    | 1     | 1     | 0   | 8   | 0.48908320E+03                |
| 1     | -1    | 1     | -1    | 0   | 8   | -0.48908320E+03               |
| 1     | 1     | 1     | 1     | 2   | 8   | 0.24745880E+04                |
| 1     | 1     | 1     | -1    | 2   | 8   | -0.24745880E+04               |
| 1     | -1    | 1     | 1     | 2   | 8   | -0.24745880E+04               |
| 1     | -1    | 1     | -1    | 2   | 8   | 0.24745880E+04                |
| 1     | 1     | 3     | 0     | 2   | 8   | 0.13675530E+04                |
| 1     | -1    | 3     | 0     | 2   | 8   | -0.13675530E+04               |
| 1     | 1     | 3     | 0     | 4   | 8   | -0.70620130E+04               |
| 1     | -1    | 3     | 0     | 4   | 8   | 0.70620130E+04                |
| 1     | 1     | 3     | 1     | 2   | 8   | 0.17169222E+04                |
| 1     | 1     | 3     | -1    | 2   | 8   | -0.17169222E+04               |
| 1     | -1    | 3     | 1     | 2   | 8   | -0.17169222E+04               |
| 1     | -1    | 3     | -1    | 2   | 8   | 0.17169222E+04                |
| 1     | 1     | 3     | 1     | 4   | 8   | -0.88661490E+04               |
| 1     | 1     | 3     | -1    | 4   | 8   | 0.88661490E+04                |
| 1     | -1    | 3     | 1     | 4   | 8   | 0.88661490E+04                |
| 1     | -1    | 3     | -1    | 4   | 8   | -0.88661490E+04               |
| 1     | 1     | 3     | 2     | 2   | 8   | 0.49081382E+03                |
| 1     | 1     | 3     | -2    | 2   | 8   | 0.49081382E+03                |
| 1     | -1    | 3     | 2     | 2   | 8   | -0.49081382E+03               |
| 1     | -1    | 3     | -2    | 2   | 8   | -0.49081382E+03               |
| 1     | 1     | 3     | 2     | 4   | 8   | -0.25345515E+04               |
| 1     | 1     | 3     | -2    | 4   | 8   | -0.25345515E+04               |
| 1     | -1    | 3     | 2     | 4   | 8   | 0.25345515E+04                |
| 1     | -1    | 3     | -2    | 4   | 8   | 0.25345515E+04                |
| 1     | 1     | 3     | 3     | 2   | 8   | 0.12332749E+04                |
| 1     | 1     | 3     | -3    | 2   | 8   | -0.12332749E+04               |
| 1     | -1    | 3     | 3     | 2   | 8   | -0.12332749E+04               |
| 1     | -1    | 3     | -3    | 2   | 8   | 0.12332749E+04                |
| 1     | 1     | 3     | 3     | 4   | 8   | -0.63686023E+04               |
| 1     | 1     | 3     | -3    | 4   | 8   | 0.63686023E+04                |
| 1     | -1    | 3     | 3     | 4   | 8   | 0.63686023E+04                |
| 1     | -1    | 3     | -3    | 4   | 8   | -0.63686023E+04               |
| 2     | 0     | 0     | 0     | 2   | 8   | -0.14397371E+06               |
| 2     | 0     | 2     | 0     | 0   | 8   | -0.18430444E+05               |
| 2     | 0     | 2     | 0     | 2   | 8   | 0.27779440E+05                |
| 2     | 0     | 2     | 0     | 4   | 8   | -0.34529020E+06               |
| 2     | 0     | 2     | 1     | 0   | 8   | -0.97088770E+04               |
| 2     | 0     | 2     | -1    | 0   | 8   | 0.97088770E+04                |
| 2     | 0     | 2     | 1     | 2   | 8   | 0.18149272E+05                |
| 2     | 0     | 2     | -1    | 2   | 8   | -0.18149272E+05               |
| 2     | 0     | 2     | 1     | 4   | 8   | -0.19068231E+06               |
| 2     | 0     | 2     | -1    | 4   | 8   | 0.19068231E+06                |
| 2     | 0     | 2     | 2     | 0   | 8   | 0.46013700E+03                |
| 2     | 0     | 2     | -2    | 0   | 8   | 0.46013700E+03                |
| 2     | 0     | 2     | 2     | 2   | 8   | -0.42407220E+04               |
| 2     | 0     | 2     | -2    | 2   | 8   | -0.42407220E+04               |
| 2     | 0     | 2     | 2     | 4   | 8   | 0.17488500E+05                |

continued on next page

| $L_A$ | $K_A$ | $L_B$ | $K_B$ | $L$ | $N$ | $C_{L_A, K_A, L_B, K_B, L}^N$ |
|-------|-------|-------|-------|-----|-----|-------------------------------|
| 2     | 0     | 2     | -2    | 4   | 8   | 0.17488500E+05                |
| 2     | 0     | 3     | 1     | 2   | 8   | 0.20110488E+04                |
| 2     | 0     | 3     | -1    | 2   | 8   | 0.20110488E+04                |
| 2     | 0     | 3     | 1     | 4   | 8   | 0.56881059E+04                |
| 2     | 0     | 3     | -1    | 4   | 8   | 0.56881059E+04                |
| 2     | 0     | 3     | 2     | 2   | 8   | -0.74691900E+03               |
| 2     | 0     | 3     | -2    | 2   | 8   | 0.74691900E+03                |
| 2     | 0     | 3     | 2     | 4   | 8   | -0.21126060E+04               |
| 2     | 0     | 3     | -2    | 4   | 8   | 0.21126060E+04                |
| 2     | 0     | 3     | 3     | 2   | 8   | -0.11192370E+04               |
| 2     | 0     | 3     | -3    | 2   | 8   | -0.11192370E+04               |
| 2     | 0     | 3     | 3     | 4   | 8   | -0.31656800E+04               |
| 2     | 0     | 3     | -3    | 4   | 8   | -0.31656800E+04               |
| 2     | 0     | 4     | 0     | 2   | 8   | -0.75483960E+02               |
| 2     | 0     | 4     | 0     | 4   | 8   | -0.61250530E+03               |
| 2     | 0     | 4     | 0     | 6   | 8   | -0.23207920E+04               |
| 2     | 0     | 4     | 1     | 2   | 8   | 0.25673252E+04                |
| 2     | 0     | 4     | -1    | 2   | 8   | -0.25673252E+04               |
| 2     | 0     | 4     | 1     | 4   | 8   | 0.49064401E+04                |
| 2     | 0     | 4     | -1    | 4   | 8   | -0.49064401E+04               |
| 2     | 0     | 4     | 1     | 6   | 8   | 0.14404340E+06                |
| 2     | 0     | 4     | -1    | 6   | 8   | -0.14404340E+06               |
| 2     | 0     | 4     | 2     | 2   | 8   | -0.99752460E+03               |
| 2     | 0     | 4     | -2    | 2   | 8   | -0.99752460E+03               |
| 2     | 0     | 4     | 2     | 4   | 8   | -0.28115910E+04               |
| 2     | 0     | 4     | -2    | 4   | 8   | -0.28115910E+04               |
| 2     | 0     | 4     | 2     | 6   | 8   | -0.52266730E+05               |
| 2     | 0     | 4     | -2    | 6   | 8   | -0.52266730E+05               |
| 2     | 0     | 4     | 3     | 2   | 8   | 0.14912410E+03                |
| 2     | 0     | 4     | -3    | 2   | 8   | -0.14912410E+03               |
| 2     | 0     | 4     | 3     | 4   | 8   | 0.77832717E+03                |
| 2     | 0     | 4     | -3    | 4   | 8   | -0.77832717E+03               |
| 2     | 0     | 4     | 3     | 6   | 8   | 0.63499040E+04                |
| 2     | 0     | 4     | -3    | 6   | 8   | -0.63499040E+04               |
| 2     | 0     | 4     | 4     | 2   | 8   | 0.51110100E+02                |
| 2     | 0     | 4     | -4    | 2   | 8   | 0.51110100E+02                |
| 2     | 0     | 4     | 4     | 4   | 8   | 0.23412950E+03                |
| 2     | 0     | 4     | -4    | 4   | 8   | 0.23412950E+03                |
| 2     | 0     | 4     | 4     | 6   | 8   | 0.23097400E+04                |
| 2     | 0     | 4     | -4    | 6   | 8   | 0.23097400E+04                |
| 2     | 1     | 0     | 0     | 2   | 8   | -0.16817329E+06               |
| 2     | -1    | 0     | 0     | 2   | 8   | 0.16817329E+06                |
| 2     | 1     | 2     | 0     | 0   | 8   | -0.97088770E+04               |
| 2     | -1    | 2     | 0     | 0   | 8   | 0.97088770E+04                |
| 2     | 1     | 2     | 0     | 2   | 8   | 0.18149272E+05                |
| 2     | -1    | 2     | 0     | 2   | 8   | -0.18149272E+05               |
| 2     | 1     | 2     | 0     | 4   | 8   | -0.19068231E+06               |
| 2     | -1    | 2     | 0     | 4   | 8   | 0.19068231E+06                |
| 2     | 1     | 2     | 1     | 0   | 8   | -0.49550860E+04               |
| 2     | -1    | 2     | -1    | 0   | 8   | -0.49550860E+04               |
| 2     | 1     | 2     | -1    | 0   | 8   | 0.52964500E+04                |
| 2     | -1    | 2     | 1     | 0   | 8   | 0.52964500E+04                |
| 2     | 1     | 2     | -1    | 2   | 8   | -0.11014152E+05               |
| 2     | -1    | 2     | 1     | 2   | 8   | -0.11014152E+05               |
| 2     | 1     | 2     | 1     | 2   | 8   | 0.12473878E+05                |
| 2     | -1    | 2     | -1    | 2   | 8   | 0.12473878E+05                |
| 2     | 1     | 2     | 1     | 4   | 8   | -0.10534564E+06               |
| 2     | -1    | 2     | -1    | 4   | 8   | -0.10534564E+06               |
| 2     | 1     | 2     | -1    | 4   | 8   | 0.10680538E+06                |
| 2     | -1    | 2     | 1     | 4   | 8   | 0.10680538E+06                |
| 2     | 1     | 2     | -2    | 0   | 8   | 0.47898790E+03                |
| 2     | -1    | 2     | 2     | 0   | 8   | -0.47898790E+03               |
| 2     | 1     | 2     | 2     | 0   | 8   | -0.81730000E+02               |
| 2     | -1    | 2     | -2    | 0   | 8   | 0.81730000E+02                |
| 2     | 1     | 2     | -2    | 2   | 8   | -0.13477800E+03               |
| 2     | -1    | 2     | 2     | 2   | 8   | 0.13477800E+03                |

continued on next page

Induction coefficients continued from previous page

| $L_A$ | $K_A$ | $L_B$ | $K_B$ | $L$ | $N$ | $C_{L_A, K_A, L_B, K_B, L}^N$ |
|-------|-------|-------|-------|-----|-----|-------------------------------|
| 2     | 1     | 2     | 2     | 2   | 8   | -0.25325053E+04               |
| 2     | -1    | 2     | -2    | 2   | 8   | 0.25325053E+04                |
| 2     | 1     | 2     | 2     | 4   | 8   | 0.51080500E+04                |
| 2     | -1    | 2     | -2    | 4   | 8   | -0.51080500E+04               |
| 2     | 1     | 2     | -2    | 4   | 8   | 0.75057800E+04                |
| 2     | -1    | 2     | 2     | 4   | 8   | -0.75057800E+04               |
| 2     | 1     | 3     | 0     | 2   | 8   | 0.18912241E+04                |
| 2     | -1    | 3     | 0     | 2   | 8   | 0.18912241E+04                |
| 2     | 1     | 3     | 0     | 4   | 8   | 0.53491900E+04                |
| 2     | -1    | 3     | 0     | 4   | 8   | 0.53491900E+04                |
| 2     | 1     | 3     | -1    | 2   | 8   | -0.10201568E+04               |
| 2     | -1    | 3     | 1     | 2   | 8   | 0.10201568E+04                |
| 2     | 1     | 3     | 1     | 2   | 8   | 0.32371620E+04                |
| 2     | -1    | 3     | -1    | 2   | 8   | -0.32371620E+04               |
| 2     | 1     | 3     | -1    | 4   | 8   | -0.28854393E+04               |
| 2     | -1    | 3     | 1     | 4   | 8   | 0.28854393E+04                |
| 2     | 1     | 3     | 1     | 4   | 8   | 0.91560770E+04                |
| 2     | -1    | 3     | -1    | 4   | 8   | -0.91560770E+04               |
| 2     | 1     | 3     | 2     | 2   | 8   | -0.28926250E+03               |
| 2     | -1    | 3     | -2    | 2   | 8   | -0.28926250E+03               |
| 2     | 1     | 3     | -2    | 2   | 8   | 0.66592460E+03                |
| 2     | -1    | 3     | 2     | 2   | 8   | 0.66592460E+03                |
| 2     | 1     | 3     | -2    | 4   | 8   | 0.18835180E+04                |
| 2     | -1    | 3     | 2     | 4   | 8   | 0.18835180E+04                |
| 2     | 1     | 3     | 2     | 4   | 8   | -0.81815800E+03               |
| 2     | -1    | 3     | -2    | 4   | 8   | -0.81815800E+03               |
| 2     | 1     | 3     | 3     | 2   | 8   | -0.73797000E+02               |
| 2     | -1    | 3     | -3    | 2   | 8   | 0.73797000E+02                |
| 2     | 1     | 3     | -3    | 2   | 8   | -0.79660800E+03               |
| 2     | -1    | 3     | 3     | 2   | 8   | 0.79660800E+03                |
| 2     | 1     | 3     | 3     | 4   | 8   | -0.20872800E+03               |
| 2     | -1    | 3     | -3    | 4   | 8   | 0.20872800E+03                |
| 2     | 1     | 3     | -3    | 4   | 8   | -0.22531480E+04               |
| 2     | -1    | 3     | 3     | 4   | 8   | 0.22531480E+04                |
| 2     | 1     | 4     | 0     | 2   | 8   | -0.43118140E+02               |
| 2     | -1    | 4     | 0     | 2   | 8   | 0.43118140E+02                |
| 2     | 1     | 4     | 0     | 4   | 8   | -0.32819280E+03               |
| 2     | -1    | 4     | 0     | 4   | 8   | 0.32819280E+03                |
| 2     | 1     | 4     | 0     | 6   | 8   | -0.14143400E+04               |
| 2     | -1    | 4     | 0     | 6   | 8   | 0.14143400E+04                |
| 2     | 1     | 4     | 1     | 2   | 8   | 0.14134371E+04                |
| 2     | 1     | 4     | -1    | 2   | 8   | -0.14134371E+04               |
| 2     | -1    | 4     | 1     | 2   | 8   | -0.14134371E+04               |
| 2     | -1    | 4     | -1    | 2   | 8   | 0.14134371E+04                |
| 2     | 1     | 4     | 1     | 4   | 8   | 0.27421679E+04                |
| 2     | 1     | 4     | -1    | 4   | 8   | -0.27421679E+04               |
| 2     | -1    | 4     | 1     | 4   | 8   | -0.27421679E+04               |
| 2     | -1    | 4     | -1    | 4   | 8   | 0.27421679E+04                |
| 2     | 1     | 4     | 1     | 6   | 8   | 0.79135510E+05                |
| 2     | 1     | 4     | -1    | 6   | 8   | -0.79135510E+05               |
| 2     | -1    | 4     | 1     | 6   | 8   | -0.79135510E+05               |
| 2     | -1    | 4     | -1    | 6   | 8   | 0.79135510E+05                |
| 2     | 1     | 4     | 2     | 2   | 8   | -0.59110350E+03               |
| 2     | 1     | 4     | -2    | 2   | 8   | -0.59110350E+03               |
| 2     | -1    | 4     | 2     | 2   | 8   | 0.59110350E+03                |
| 2     | -1    | 4     | -2    | 2   | 8   | 0.59110350E+03                |
| 2     | 1     | 4     | 2     | 4   | 8   | -0.16270347E+04               |
| 2     | 1     | 4     | -2    | 4   | 8   | -0.16270347E+04               |
| 2     | -1    | 4     | 2     | 4   | 8   | 0.16270347E+04                |
| 2     | -1    | 4     | -2    | 4   | 8   | 0.16270347E+04                |
| 2     | 1     | 4     | 2     | 6   | 8   | -0.31131270E+05               |
| 2     | 1     | 4     | -2    | 6   | 8   | -0.31131270E+05               |
| 2     | -1    | 4     | 2     | 6   | 8   | 0.31131270E+05                |
| 2     | -1    | 4     | -2    | 6   | 8   | 0.31131270E+05                |
| 2     | 1     | 4     | 3     | 2   | 8   | 0.90197110E+02                |
| 2     | 1     | 4     | -3    | 2   | 8   | -0.90197110E+02               |

continued on next page

| $L_A$ | $K_A$ | $L_B$ | $K_B$ | $L$ | $N$ | $C_{L_A, K_A, L_B, K_B, L}^N$ |
|-------|-------|-------|-------|-----|-----|-------------------------------|
| 2     | -1    | 4     | 3     | 2   | 8   | -0.90197110E+02               |
| 2     | -1    | 4     | -3    | 2   | 8   | 0.90197110E+02                |
| 2     | 1     | 4     | 3     | 4   | 8   | 0.43669843E+03                |
| 2     | 1     | 4     | -3    | 4   | 8   | -0.43669843E+03               |
| 2     | -1    | 4     | 3     | 4   | 8   | -0.43669843E+03               |
| 2     | -1    | 4     | -3    | 4   | 8   | 0.43669843E+03                |
| 2     | 1     | 4     | 3     | 6   | 8   | 0.39800050E+04                |
| 2     | 1     | 4     | -3    | 6   | 8   | -0.39800050E+04               |
| 2     | -1    | 4     | 3     | 6   | 8   | -0.39800050E+04               |
| 2     | -1    | 4     | -3    | 6   | 8   | 0.39800050E+04                |
| 2     | 1     | 4     | 4     | 2   | 8   | 0.43174400E+02                |
| 2     | 1     | 4     | -4    | 2   | 8   | 0.43174400E+02                |
| 2     | -1    | 4     | 4     | 2   | 8   | -0.43174400E+02               |
| 2     | -1    | 4     | -4    | 2   | 8   | -0.43174400E+02               |
| 2     | 1     | 4     | 4     | 4   | 8   | 0.15881460E+03                |
| 2     | 1     | 4     | -4    | 4   | 8   | 0.15881460E+03                |
| 2     | -1    | 4     | 4     | 4   | 8   | -0.15881460E+03               |
| 2     | -1    | 4     | -4    | 4   | 8   | -0.15881460E+03               |
| 2     | 1     | 4     | 4     | 6   | 8   | 0.21104090E+04                |
| 2     | 1     | 4     | -4    | 6   | 8   | 0.21104090E+04                |
| 2     | -1    | 4     | 4     | 6   | 8   | -0.21104090E+04               |
| 2     | -1    | 4     | -4    | 6   | 8   | -0.21104090E+04               |
| 2     | 2     | 0     | 0     | 2   | 8   | 0.91692880E+05                |
| 2     | -2    | 0     | 0     | 2   | 8   | 0.91692880E+05                |
| 2     | 2     | 2     | 0     | 0   | 8   | 0.46013700E+03                |
| 2     | -2    | 2     | 0     | 0   | 8   | 0.46013700E+03                |
| 2     | 2     | 2     | 0     | 2   | 8   | -0.42407220E+04               |
| 2     | -2    | 2     | 0     | 2   | 8   | -0.42407220E+04               |
| 2     | 2     | 2     | 0     | 4   | 8   | 0.17488500E+05                |
| 2     | -2    | 2     | 0     | 4   | 8   | 0.17488500E+05                |
| 2     | 2     | 2     | -1    | 0   | 8   | -0.47898790E+03               |
| 2     | -2    | 2     | 1     | 0   | 8   | 0.47898790E+03                |
| 2     | 2     | 2     | 1     | 0   | 8   | -0.81730000E+02               |
| 2     | -2    | 2     | -1    | 0   | 8   | 0.81730000E+02                |
| 2     | 2     | 2     | -1    | 2   | 8   | 0.13477800E+03                |
| 2     | -2    | 2     | 1     | 2   | 8   | -0.13477800E+03               |
| 2     | 2     | 2     | 1     | 2   | 8   | -0.25325053E+04               |
| 2     | -2    | 2     | -1    | 2   | 8   | 0.25325053E+04                |
| 2     | 2     | 2     | 1     | 4   | 8   | 0.51080500E+04                |
| 2     | -2    | 2     | -1    | 4   | 8   | -0.51080500E+04               |
| 2     | 2     | 2     | -1    | 4   | 8   | -0.75057800E+04               |
| 2     | -2    | 2     | 1     | 4   | 8   | 0.75057800E+04                |
| 2     | 2     | 2     | -2    | 0   | 8   | 0.11768622E+04                |
| 2     | -2    | 2     | 2     | 0   | 8   | 0.11768622E+04                |
| 2     | 2     | 2     | 2     | 0   | 8   | 0.63266660E+03                |
| 2     | -2    | 2     | -2    | 0   | 8   | 0.63266660E+03                |
| 2     | 2     | 2     | 2     | 2   | 8   | -0.19315860E+04               |
| 2     | -2    | 2     | -2    | 2   | 8   | -0.19315860E+04               |
| 2     | 2     | 2     | -2    | 2   | 8   | 0.39549160E+03                |
| 2     | -2    | 2     | 2     | 2   | 8   | 0.39549160E+03                |
| 2     | 2     | 2     | 2     | 4   | 8   | 0.14297852E+05                |
| 2     | -2    | 2     | -2    | 4   | 8   | 0.14297852E+05                |
| 2     | 2     | 2     | -2    | 4   | 8   | 0.16624930E+05                |
| 2     | -2    | 2     | 2     | 4   | 8   | 0.16624930E+05                |
| 2     | 2     | 3     | 0     | 2   | 8   | -0.28733917E+04               |
| 2     | -2    | 3     | 0     | 2   | 8   | 0.28733917E+04                |
| 2     | 2     | 3     | 0     | 4   | 8   | -0.81271800E+04               |
| 2     | -2    | 3     | 0     | 4   | 8   | 0.81271800E+04                |
| 2     | 2     | 3     | 1     | 2   | 8   | -0.33958582E+04               |
| 2     | -2    | 3     | -1    | 2   | 8   | -0.33958582E+04               |
| 2     | 2     | 3     | -1    | 2   | 8   | 0.35623245E+04                |
| 2     | -2    | 3     | 1     | 2   | 8   | 0.35623245E+04                |
| 2     | 2     | 3     | -1    | 4   | 8   | 0.10075778E+05                |
| 2     | -2    | 3     | 1     | 4   | 8   | 0.10075778E+05                |
| 2     | 2     | 3     | 1     | 4   | 8   | -0.96049395E+04               |
| 2     | -2    | 3     | -1    | 4   | 8   | -0.96049395E+04               |

continued on next page

Induction coefficients continued from previous page

| $L_A$ | $K_A$ | $L_B$ | $K_B$ | $L$ | $N$ | $C_{L_A, K_A, L_B, K_B, L}^N$ |
|-------|-------|-------|-------|-----|-----|-------------------------------|
| 2     | 2     | 3     | 2     | 2   | 8   | -0.14822990E+04               |
| 2     | -2    | 3     | -2    | 2   | 8   | 0.14822990E+04                |
| 2     | 2     | 3     | -2    | 2   | 8   | -0.67801500E+02               |
| 2     | -2    | 3     | 2     | 2   | 8   | 0.67801500E+02                |
| 2     | 2     | 3     | -2    | 4   | 8   | -0.19177100E+03               |
| 2     | -2    | 3     | 2     | 4   | 8   | 0.19177100E+03                |
| 2     | 2     | 3     | 2     | 4   | 8   | -0.41925740E+04               |
| 2     | -2    | 3     | -2    | 4   | 8   | 0.41925740E+04                |
| 2     | 2     | 3     | -3    | 2   | 8   | 0.37081890E+04                |
| 2     | -2    | 3     | 3     | 2   | 8   | 0.37081890E+04                |
| 2     | 2     | 3     | 3     | 2   | 8   | -0.69940000E+02               |
| 2     | -2    | 3     | -3    | 2   | 8   | -0.69940000E+02               |
| 2     | 2     | 3     | -3    | 4   | 8   | 0.10488341E+05                |
| 2     | -2    | 3     | 3     | 4   | 8   | 0.10488341E+05                |
| 2     | 2     | 3     | 3     | 4   | 8   | -0.19782300E+03               |
| 2     | -2    | 3     | -3    | 4   | 8   | -0.19782300E+03               |
| 2     | 2     | 4     | 0     | 2   | 8   | -0.18633907E+02               |
| 2     | -2    | 4     | 0     | 2   | 8   | -0.18633907E+02               |
| 2     | 2     | 4     | 0     | 4   | 8   | 0.71386440E+02                |
| 2     | -2    | 4     | 0     | 4   | 8   | 0.71386440E+02                |
| 2     | 2     | 4     | 0     | 6   | 8   | -0.14829214E+04               |
| 2     | -2    | 4     | 0     | 6   | 8   | -0.14829214E+04               |
| 2     | 2     | 4     | 1     | 2   | 8   | 0.88926700E+02                |
| 2     | 2     | 4     | -1    | 2   | 8   | -0.88926700E+02               |
| 2     | -2    | 4     | 1     | 2   | 8   | 0.88926700E+02                |
| 2     | -2    | 4     | -1    | 2   | 8   | -0.88926700E+02               |
| 2     | 2     | 4     | 1     | 4   | 8   | 0.59013929E+03                |
| 2     | 2     | 4     | -1    | 4   | 8   | -0.59013929E+03               |
| 2     | -2    | 4     | 1     | 4   | 8   | 0.59013929E+03                |
| 2     | -2    | 4     | -1    | 4   | 8   | -0.59013929E+03               |
| 2     | 2     | 4     | 1     | 6   | 8   | 0.32714800E+04                |
| 2     | 2     | 4     | -1    | 6   | 8   | -0.32714800E+04               |
| 2     | -2    | 4     | 1     | 6   | 8   | 0.32714800E+04                |
| 2     | -2    | 4     | -1    | 6   | 8   | -0.32714800E+04               |
| 2     | 2     | 4     | 2     | 2   | 8   | -0.46483900E+03               |
| 2     | 2     | 4     | -2    | 2   | 8   | -0.46483900E+03               |
| 2     | -2    | 4     | 2     | 2   | 8   | -0.46483900E+03               |
| 2     | -2    | 4     | -2    | 2   | 8   | -0.46483900E+03               |
| 2     | 2     | 4     | 2     | 4   | 8   | -0.90952960E+03               |
| 2     | 2     | 4     | -2    | 4   | 8   | -0.90952960E+03               |
| 2     | -2    | 4     | 2     | 4   | 8   | -0.90952960E+03               |
| 2     | -2    | 4     | -2    | 4   | 8   | -0.90952960E+03               |
| 2     | 2     | 4     | 2     | 6   | 8   | -0.25993870E+05               |
| 2     | 2     | 4     | -2    | 6   | 8   | -0.25993870E+05               |
| 2     | -2    | 4     | 2     | 6   | 8   | -0.25993870E+05               |
| 2     | -2    | 4     | -2    | 6   | 8   | -0.25993870E+05               |
| 2     | 2     | 4     | 3     | 2   | 8   | 0.88282300E+02                |
| 2     | 2     | 4     | -3    | 2   | 8   | -0.88282300E+02               |
| 2     | -2    | 4     | 3     | 2   | 8   | 0.88282300E+02                |
| 2     | -2    | 4     | -3    | 2   | 8   | -0.88282300E+02               |
| 2     | 2     | 4     | 3     | 4   | 8   | 0.11104586E+03                |
| 2     | 2     | 4     | -3    | 4   | 8   | -0.11104586E+03               |
| 2     | -2    | 4     | 3     | 4   | 8   | 0.11104586E+03                |
| 2     | -2    | 4     | -3    | 4   | 8   | -0.11104586E+03               |
| 2     | 2     | 4     | 3     | 6   | 8   | 0.51889790E+04                |
| 2     | 2     | 4     | -3    | 6   | 8   | -0.51889790E+04               |
| 2     | -2    | 4     | 3     | 6   | 8   | 0.51889790E+04                |
| 2     | -2    | 4     | -3    | 6   | 8   | -0.51889790E+04               |
| 2     | 2     | 4     | 4     | 2   | 8   | 0.15611345E+03                |
| 2     | 2     | 4     | -4    | 2   | 8   | 0.15611345E+03                |
| 2     | -2    | 4     | 4     | 2   | 8   | 0.15611345E+03                |
| 2     | -2    | 4     | -4    | 2   | 8   | 0.15611345E+03                |
| 2     | 2     | 4     | 4     | 4   | 8   | 0.31518824E+03                |
| 2     | 2     | 4     | -4    | 4   | 8   | 0.31518824E+03                |
| 2     | -2    | 4     | 4     | 4   | 8   | 0.31518824E+03                |
| 2     | -2    | 4     | -4    | 4   | 8   | 0.31518824E+03                |

continued on next page

Induction coefficients continued from previous page

| $L_A$ | $K_A$ | $L_B$ | $K_B$ | $L$ | $N$ | $C_{L_A, K_A, L_B, K_B, L}^N$ |
|-------|-------|-------|-------|-----|-----|-------------------------------|
| 2     | 2     | 4     | 4     | 6   | 8   | 0.86901180E+04                |
| 2     | 2     | 4     | -4    | 6   | 8   | 0.86901180E+04                |
| 2     | -2    | 4     | 4     | 6   | 8   | 0.86901180E+04                |
| 2     | -2    | 4     | -4    | 6   | 8   | 0.86901180E+04                |
| 3     | 0     | 1     | 0     | 2   | 8   | 0.14490942E+05                |
| 3     | 0     | 1     | 0     | 4   | 8   | -0.74830900E+05               |
| 3     | 0     | 1     | 1     | 2   | 8   | 0.13675530E+04                |
| 3     | 0     | 1     | -1    | 2   | 8   | -0.13675530E+04               |
| 3     | 0     | 1     | 1     | 4   | 8   | -0.70620130E+04               |
| 3     | 0     | 1     | -1    | 4   | 8   | 0.70620130E+04                |
| 3     | 0     | 2     | 1     | 2   | 8   | -0.18912241E+04               |
| 3     | 0     | 2     | -1    | 2   | 8   | -0.18912241E+04               |
| 3     | 0     | 2     | 1     | 4   | 8   | -0.53491900E+04               |
| 3     | 0     | 2     | -1    | 4   | 8   | -0.53491900E+04               |
| 3     | 0     | 2     | 2     | 2   | 8   | 0.28733917E+04                |
| 3     | 0     | 2     | -2    | 2   | 8   | -0.28733917E+04               |
| 3     | 0     | 2     | 2     | 4   | 8   | 0.81271800E+04                |
| 3     | 0     | 2     | -2    | 4   | 8   | -0.81271800E+04               |
| 3     | 0     | 3     | 0     | 0   | 8   | 0.12353630E+04                |
| 3     | 0     | 3     | 0     | 2   | 8   | -0.19138162E+04               |
| 3     | 0     | 3     | 0     | 4   | 8   | -0.89549300E+04               |
| 3     | 0     | 3     | 0     | 6   | 8   | -0.27913340E+06               |
| 3     | 0     | 3     | 1     | 0   | 8   | 0.13950686E+04                |
| 3     | 0     | 3     | -1    | 0   | 8   | -0.13950686E+04               |
| 3     | 0     | 3     | 1     | 2   | 8   | -0.21612310E+04               |
| 3     | 0     | 3     | -1    | 2   | 8   | 0.21612310E+04                |
| 3     | 0     | 3     | 1     | 4   | 8   | -0.10112608E+05               |
| 3     | 0     | 3     | -1    | 4   | 8   | 0.10112608E+05                |
| 3     | 0     | 3     | 1     | 6   | 8   | -0.31521930E+06               |
| 3     | 0     | 3     | -1    | 6   | 8   | 0.31521930E+06                |
| 3     | 0     | 3     | 2     | 0   | 8   | 0.13222266E+03                |
| 3     | 0     | 3     | -2    | 0   | 8   | 0.13222266E+03                |
| 3     | 0     | 3     | 2     | 2   | 8   | -0.20483852E+03               |
| 3     | 0     | 3     | -2    | 2   | 8   | -0.20483852E+03               |
| 3     | 0     | 3     | 2     | 4   | 8   | -0.95845886E+03               |
| 3     | 0     | 3     | -2    | 4   | 8   | -0.95845886E+03               |
| 3     | 0     | 3     | 2     | 6   | 8   | -0.29876061E+05               |
| 3     | 0     | 3     | -2    | 6   | 8   | -0.29876061E+05               |
| 3     | 0     | 3     | 3     | 0   | 8   | 0.26129726E+03                |
| 3     | 0     | 3     | -3    | 0   | 8   | -0.26129726E+03               |
| 3     | 0     | 3     | 3     | 2   | 8   | -0.40480000E+03               |
| 3     | 0     | 3     | -3    | 2   | 8   | 0.40480000E+03                |
| 3     | 0     | 3     | 3     | 4   | 8   | -0.18940973E+04               |
| 3     | 0     | 3     | -3    | 4   | 8   | 0.18940973E+04                |
| 3     | 0     | 3     | 3     | 6   | 8   | -0.59040770E+05               |
| 3     | 0     | 3     | -3    | 6   | 8   | 0.59040770E+05                |
| 3     | 1     | 1     | 0     | 2   | 8   | 0.16649063E+05                |
| 3     | -1    | 1     | 0     | 2   | 8   | -0.16649063E+05               |
| 3     | 1     | 1     | 0     | 4   | 8   | -0.85975400E+05               |
| 3     | -1    | 1     | 0     | 4   | 8   | 0.85975400E+05                |
| 3     | 1     | 1     | 1     | 2   | 8   | 0.17169222E+04                |
| 3     | 1     | 1     | -1    | 2   | 8   | -0.17169222E+04               |
| 3     | -1    | 1     | 1     | 2   | 8   | -0.17169222E+04               |
| 3     | -1    | 1     | -1    | 2   | 8   | 0.17169222E+04                |
| 3     | 1     | 1     | 1     | 4   | 8   | -0.88661490E+04               |
| 3     | 1     | 1     | -1    | 4   | 8   | 0.88661490E+04                |
| 3     | -1    | 1     | 1     | 4   | 8   | 0.88661490E+04                |
| 3     | -1    | 1     | -1    | 4   | 8   | -0.88661490E+04               |
| 3     | 1     | 2     | 0     | 2   | 8   | -0.20110488E+04               |
| 3     | -1    | 2     | 0     | 2   | 8   | -0.20110488E+04               |
| 3     | 1     | 2     | 0     | 4   | 8   | -0.56881059E+04               |
| 3     | -1    | 2     | 0     | 4   | 8   | -0.56881059E+04               |
| 3     | 1     | 2     | -1    | 2   | 8   | -0.10201568E+04               |
| 3     | -1    | 2     | 1     | 2   | 8   | 0.10201568E+04                |
| 3     | 1     | 2     | 1     | 2   | 8   | -0.32371620E+04               |
| 3     | -1    | 2     | -1    | 2   | 8   | 0.32371620E+04                |

continued on next page

| $L_A$ | $K_A$ | $L_B$ | $K_B$ | $L$ | $N$ | $C_{L_A, K_A, L_B, K_B, L}^N$ |
|-------|-------|-------|-------|-----|-----|-------------------------------|
| 3     | 1     | 2     | -1    | 4   | 8   | -0.28854393E+04               |
| 3     | -1    | 2     | 1     | 4   | 8   | 0.28854393E+04                |
| 3     | 1     | 2     | 1     | 4   | 8   | -0.91560770E+04               |
| 3     | -1    | 2     | -1    | 4   | 8   | 0.91560770E+04                |
| 3     | 1     | 2     | 2     | 2   | 8   | 0.33958582E+04                |
| 3     | -1    | 2     | -2    | 2   | 8   | 0.33958582E+04                |
| 3     | 1     | 2     | -2    | 2   | 8   | -0.35623245E+04               |
| 3     | -1    | 2     | 2     | 2   | 8   | -0.35623245E+04               |
| 3     | 1     | 2     | -2    | 4   | 8   | -0.10075778E+05               |
| 3     | -1    | 2     | 2     | 4   | 8   | -0.10075778E+05               |
| 3     | 1     | 2     | 2     | 4   | 8   | 0.96049395E+04                |
| 3     | -1    | 2     | -2    | 4   | 8   | 0.96049395E+04                |
| 3     | 1     | 3     | 0     | 0   | 8   | 0.13950686E+04                |
| 3     | -1    | 3     | 0     | 0   | 8   | -0.13950686E+04               |
| 3     | 1     | 3     | 0     | 2   | 8   | -0.21612310E+04               |
| 3     | -1    | 3     | 0     | 2   | 8   | 0.21612310E+04                |
| 3     | 1     | 3     | 0     | 4   | 8   | -0.10112608E+05               |
| 3     | -1    | 3     | 0     | 4   | 8   | 0.10112608E+05                |
| 3     | 1     | 3     | 0     | 6   | 8   | -0.31521930E+06               |
| 3     | -1    | 3     | 0     | 6   | 8   | 0.31521930E+06                |
| 3     | 1     | 3     | 1     | 0   | 8   | 0.15705580E+04                |
| 3     | 1     | 3     | -1    | 0   | 8   | -0.15705580E+04               |
| 3     | -1    | 3     | 1     | 0   | 8   | -0.15705580E+04               |
| 3     | -1    | 3     | -1    | 0   | 8   | 0.15705580E+04                |
| 3     | 1     | 3     | 1     | 2   | 8   | -0.24330980E+04               |
| 3     | 1     | 3     | -1    | 2   | 8   | 0.24330980E+04                |
| 3     | -1    | 3     | 1     | 2   | 8   | 0.24330980E+04                |
| 3     | -1    | 3     | -1    | 2   | 8   | -0.24330980E+04               |
| 3     | 1     | 3     | 1     | 4   | 8   | -0.11384698E+05               |
| 3     | 1     | 3     | -1    | 4   | 8   | 0.11384698E+05                |
| 3     | -1    | 3     | 1     | 4   | 8   | 0.11384698E+05                |
| 3     | -1    | 3     | -1    | 4   | 8   | -0.11384698E+05               |
| 3     | 1     | 3     | 1     | 6   | 8   | -0.35487160E+06               |
| 3     | 1     | 3     | -1    | 6   | 8   | 0.35487160E+06                |
| 3     | -1    | 3     | 1     | 6   | 8   | 0.35487160E+06                |
| 3     | -1    | 3     | -1    | 6   | 8   | -0.35487160E+06               |
| 3     | 1     | 3     | 2     | 0   | 8   | 0.13961060E+03                |
| 3     | 1     | 3     | -2    | 0   | 8   | 0.13961060E+03                |
| 3     | -1    | 3     | 2     | 0   | 8   | -0.13961060E+03               |
| 3     | -1    | 3     | -2    | 0   | 8   | -0.13961060E+03               |
| 3     | 1     | 3     | 2     | 2   | 8   | -0.21628379E+03               |
| 3     | 1     | 3     | -2    | 2   | 8   | -0.21628379E+03               |
| 3     | -1    | 3     | 2     | 2   | 8   | 0.21628379E+03                |
| 3     | -1    | 3     | -2    | 2   | 8   | 0.21628379E+03                |
| 3     | 1     | 3     | 2     | 4   | 8   | -0.10120124E+04               |
| 3     | 1     | 3     | -2    | 4   | 8   | -0.10120124E+04               |
| 3     | -1    | 3     | 2     | 4   | 8   | 0.10120124E+04                |
| 3     | -1    | 3     | -2    | 4   | 8   | 0.10120124E+04                |
| 3     | 1     | 3     | 2     | 6   | 8   | -0.31545372E+05               |
| 3     | 1     | 3     | -2    | 6   | 8   | -0.31545372E+05               |
| 3     | -1    | 3     | 2     | 6   | 8   | 0.31545372E+05                |
| 3     | -1    | 3     | -2    | 6   | 8   | 0.31545372E+05                |
| 3     | 1     | 3     | 3     | 0   | 8   | 0.26847699E+03                |
| 3     | 1     | 3     | -3    | 0   | 8   | -0.26847699E+03               |
| 3     | -1    | 3     | 3     | 0   | 8   | -0.26847699E+03               |
| 3     | -1    | 3     | -3    | 0   | 8   | 0.26847699E+03                |
| 3     | 1     | 3     | 3     | 2   | 8   | -0.41592280E+03               |
| 3     | 1     | 3     | -3    | 2   | 8   | 0.41592280E+03                |
| 3     | -1    | 3     | 3     | 2   | 8   | 0.41592280E+03                |
| 3     | -1    | 3     | -3    | 2   | 8   | -0.41592280E+03               |
| 3     | 1     | 3     | 3     | 4   | 8   | -0.19461426E+04               |
| 3     | 1     | 3     | -3    | 4   | 8   | 0.19461426E+04                |
| 3     | -1    | 3     | 3     | 4   | 8   | 0.19461426E+04                |
| 3     | -1    | 3     | -3    | 4   | 8   | -0.19461426E+04               |
| 3     | 1     | 3     | 3     | 6   | 8   | -0.60663050E+05               |
| 3     | 1     | 3     | -3    | 6   | 8   | 0.60663050E+05                |

continued on next page

| $L_A$ | $K_A$ | $L_B$ | $K_B$ | $L$ | $N$ | $C_{L_A, K_A, L_B, K_B, L}^N$ |
|-------|-------|-------|-------|-----|-----|-------------------------------|
| 3     | -1    | 3     | 3     | 6   | 8   | 0.60663050E+05                |
| 3     | -1    | 3     | -3    | 6   | 8   | -0.60663050E+05               |
| 3     | 2     | 1     | 0     | 2   | 8   | 0.21193374E+04                |
| 3     | -2    | 1     | 0     | 2   | 8   | 0.21193374E+04                |
| 3     | 2     | 1     | 0     | 4   | 8   | -0.10944213E+05               |
| 3     | -2    | 1     | 0     | 4   | 8   | -0.10944213E+05               |
| 3     | 2     | 1     | 1     | 2   | 8   | 0.49081382E+03                |
| 3     | 2     | 1     | -1    | 2   | 8   | -0.49081382E+03               |
| 3     | -2    | 1     | 1     | 2   | 8   | 0.49081382E+03                |
| 3     | -2    | 1     | -1    | 2   | 8   | -0.49081382E+03               |
| 3     | 2     | 1     | 1     | 4   | 8   | -0.25345515E+04               |
| 3     | 2     | 1     | -1    | 4   | 8   | 0.25345515E+04                |
| 3     | -2    | 1     | 1     | 4   | 8   | -0.25345515E+04               |
| 3     | -2    | 1     | -1    | 4   | 8   | 0.25345515E+04                |
| 3     | 2     | 2     | 0     | 2   | 8   | 0.74691900E+03                |
| 3     | -2    | 2     | 0     | 2   | 8   | -0.74691900E+03               |
| 3     | 2     | 2     | 0     | 4   | 8   | 0.21126060E+04                |
| 3     | -2    | 2     | 0     | 4   | 8   | -0.21126060E+04               |
| 3     | 2     | 2     | 1     | 2   | 8   | 0.28926250E+03                |
| 3     | -2    | 2     | -1    | 2   | 8   | 0.28926250E+03                |
| 3     | 2     | 2     | -1    | 2   | 8   | -0.66592460E+03               |
| 3     | -2    | 2     | 1     | 2   | 8   | -0.66592460E+03               |
| 3     | 2     | 2     | -1    | 4   | 8   | -0.18835180E+04               |
| 3     | -2    | 2     | 1     | 4   | 8   | -0.18835180E+04               |
| 3     | 2     | 2     | 1     | 4   | 8   | 0.81815800E+03                |
| 3     | -2    | 2     | -1    | 4   | 8   | 0.81815800E+03                |
| 3     | 2     | 2     | 2     | 2   | 8   | 0.14822990E+04                |
| 3     | -2    | 2     | -2    | 2   | 8   | -0.14822990E+04               |
| 3     | 2     | 2     | -2    | 2   | 8   | -0.67801500E+02               |
| 3     | -2    | 2     | 2     | 2   | 8   | 0.67801500E+02                |
| 3     | 2     | 2     | -2    | 4   | 8   | -0.19177100E+03               |
| 3     | -2    | 2     | 2     | 4   | 8   | 0.19177100E+03                |
| 3     | 2     | 2     | 2     | 4   | 8   | 0.41925740E+04                |
| 3     | -2    | 2     | -2    | 4   | 8   | -0.41925740E+04               |
| 3     | 2     | 3     | 0     | 0   | 8   | 0.13222266E+03                |
| 3     | -2    | 3     | 0     | 0   | 8   | 0.13222266E+03                |
| 3     | 2     | 3     | 0     | 2   | 8   | -0.20483852E+03               |
| 3     | -2    | 3     | 0     | 2   | 8   | -0.20483852E+03               |
| 3     | 2     | 3     | 0     | 4   | 8   | -0.95845886E+03               |
| 3     | -2    | 3     | 0     | 4   | 8   | -0.95845886E+03               |
| 3     | 2     | 3     | 0     | 6   | 8   | -0.29876061E+05               |
| 3     | -2    | 3     | 0     | 6   | 8   | -0.29876061E+05               |
| 3     | 2     | 3     | 1     | 0   | 8   | 0.13961060E+03                |
| 3     | 2     | 3     | -1    | 0   | 8   | -0.13961060E+03               |
| 3     | -2    | 3     | 1     | 0   | 8   | 0.13961060E+03                |
| 3     | -2    | 3     | -1    | 0   | 8   | -0.13961060E+03               |
| 3     | 2     | 3     | 1     | 2   | 8   | -0.21628379E+03               |
| 3     | 2     | 3     | -1    | 2   | 8   | 0.21628379E+03                |
| 3     | -2    | 3     | 1     | 2   | 8   | -0.21628379E+03               |
| 3     | -2    | 3     | -1    | 2   | 8   | 0.21628379E+03                |
| 3     | 2     | 3     | 1     | 4   | 8   | -0.10120124E+04               |
| 3     | 2     | 3     | -1    | 4   | 8   | 0.10120124E+04                |
| 3     | -2    | 3     | 1     | 4   | 8   | -0.10120124E+04               |
| 3     | -2    | 3     | -1    | 4   | 8   | 0.10120124E+04                |
| 3     | 2     | 3     | 1     | 6   | 8   | -0.31545372E+05               |
| 3     | 2     | 3     | -1    | 6   | 8   | 0.31545372E+05                |
| 3     | -2    | 3     | 1     | 6   | 8   | -0.31545372E+05               |
| 3     | -2    | 3     | -1    | 6   | 8   | 0.31545372E+05                |
| 3     | 2     | 3     | 2     | 0   | 8   | -0.52195700E+01               |
| 3     | 2     | 3     | -2    | 0   | 8   | -0.52195700E+01               |
| 3     | -2    | 3     | 2     | 0   | 8   | -0.52195700E+01               |
| 3     | -2    | 3     | -2    | 0   | 8   | -0.52195700E+01               |
| 3     | 2     | 3     | 2     | 2   | 8   | 0.80861240E+01                |
| 3     | 2     | 3     | -2    | 2   | 8   | 0.80861240E+01                |
| 3     | -2    | 3     | 2     | 2   | 8   | 0.80861240E+01                |
| 3     | -2    | 3     | -2    | 2   | 8   | 0.80861240E+01                |

continued on next page

| $L_A$ | $K_A$ | $L_B$ | $K_B$ | $L$ | $N$ | $C_{L_A, K_A, L_B, K_B, L}^N$ |
|-------|-------|-------|-------|-----|-----|-------------------------------|
| 3     | 2     | 3     | 2     | 4   | 8   | 0.37835760E+02                |
| 3     | 2     | 3     | -2    | 4   | 8   | 0.37835760E+02                |
| 3     | -2    | 3     | 2     | 4   | 8   | 0.37835760E+02                |
| 3     | -2    | 3     | -2    | 4   | 8   | 0.37835760E+02                |
| 3     | 2     | 3     | 2     | 6   | 8   | 0.11793752E+04                |
| 3     | 2     | 3     | -2    | 6   | 8   | 0.11793752E+04                |
| 3     | -2    | 3     | 2     | 6   | 8   | 0.11793752E+04                |
| 3     | -2    | 3     | -2    | 6   | 8   | 0.11793752E+04                |
| 3     | 2     | 3     | 3     | 0   | 8   | -0.25124798E+02               |
| 3     | 2     | 3     | -3    | 0   | 8   | 0.25124798E+02                |
| 3     | -2    | 3     | 3     | 0   | 8   | -0.25124798E+02               |
| 3     | -2    | 3     | -3    | 0   | 8   | 0.25124798E+02                |
| 3     | 2     | 3     | 3     | 2   | 8   | 0.38923164E+02                |
| 3     | 2     | 3     | -3    | 2   | 8   | -0.38923164E+02               |
| 3     | -2    | 3     | 3     | 2   | 8   | 0.38923164E+02                |
| 3     | -2    | 3     | -3    | 2   | 8   | -0.38923164E+02               |
| 3     | 2     | 3     | 3     | 4   | 8   | 0.18212529E+03                |
| 3     | 2     | 3     | -3    | 4   | 8   | -0.18212529E+03               |
| 3     | -2    | 3     | 3     | 4   | 8   | 0.18212529E+03                |
| 3     | -2    | 3     | -3    | 4   | 8   | -0.18212529E+03               |
| 3     | 2     | 3     | 3     | 6   | 8   | 0.56770120E+04                |
| 3     | 2     | 3     | -3    | 6   | 8   | -0.56770120E+04               |
| 3     | -2    | 3     | 3     | 6   | 8   | 0.56770120E+04                |
| 3     | -2    | 3     | -3    | 6   | 8   | -0.56770120E+04               |
| 3     | 3     | 1     | 0     | 2   | 8   | 0.46227304E+04                |
| 3     | -3    | 1     | 0     | 2   | 8   | -0.46227304E+04               |
| 3     | 3     | 1     | 0     | 4   | 8   | -0.23871680E+05               |
| 3     | -3    | 1     | 0     | 4   | 8   | 0.23871680E+05                |
| 3     | 3     | 1     | 1     | 2   | 8   | 0.12332749E+04                |
| 3     | 3     | 1     | -1    | 2   | 8   | -0.12332749E+04               |
| 3     | -3    | 1     | 1     | 2   | 8   | -0.12332749E+04               |
| 3     | -3    | 1     | -1    | 2   | 8   | 0.12332749E+04                |
| 3     | 3     | 1     | 1     | 4   | 8   | -0.63686023E+04               |
| 3     | 3     | 1     | -1    | 4   | 8   | 0.63686023E+04                |
| 3     | -3    | 1     | 1     | 4   | 8   | 0.63686023E+04                |
| 3     | -3    | 1     | -1    | 4   | 8   | -0.63686023E+04               |
| 3     | 3     | 2     | 0     | 2   | 8   | 0.11192370E+04                |
| 3     | -3    | 2     | 0     | 2   | 8   | 0.11192370E+04                |
| 3     | 3     | 2     | 0     | 4   | 8   | 0.31656800E+04                |
| 3     | -3    | 2     | 0     | 4   | 8   | 0.31656800E+04                |
| 3     | 3     | 2     | 1     | 2   | 8   | 0.73797000E+02                |
| 3     | -3    | 2     | -1    | 2   | 8   | -0.73797000E+02               |
| 3     | 3     | 2     | -1    | 2   | 8   | -0.79660800E+03               |
| 3     | -3    | 2     | 1     | 2   | 8   | 0.79660800E+03                |
| 3     | 3     | 2     | 1     | 4   | 8   | 0.20872800E+03                |
| 3     | -3    | 2     | -1    | 4   | 8   | -0.20872800E+03               |
| 3     | 3     | 2     | -1    | 4   | 8   | -0.22531480E+04               |
| 3     | -3    | 2     | 1     | 4   | 8   | 0.22531480E+04                |
| 3     | 3     | 2     | -2    | 2   | 8   | -0.37081890E+04               |
| 3     | -3    | 2     | 2     | 2   | 8   | -0.37081890E+04               |
| 3     | 3     | 2     | 2     | 2   | 8   | 0.69940000E+02                |
| 3     | -3    | 2     | -2    | 2   | 8   | 0.69940000E+02                |
| 3     | 3     | 2     | -2    | 4   | 8   | -0.10488341E+05               |
| 3     | -3    | 2     | 2     | 4   | 8   | -0.10488341E+05               |
| 3     | 3     | 2     | 2     | 4   | 8   | 0.19782300E+03                |
| 3     | -3    | 2     | -2    | 4   | 8   | 0.19782300E+03                |
| 3     | 3     | 3     | 0     | 0   | 8   | 0.26129726E+03                |
| 3     | -3    | 3     | 0     | 0   | 8   | -0.26129726E+03               |
| 3     | 3     | 3     | 0     | 2   | 8   | -0.40480000E+03               |
| 3     | -3    | 3     | 0     | 2   | 8   | 0.40480000E+03                |
| 3     | 3     | 3     | 0     | 4   | 8   | -0.18940973E+04               |
| 3     | -3    | 3     | 0     | 4   | 8   | 0.18940973E+04                |
| 3     | 3     | 3     | 0     | 6   | 8   | -0.59040770E+05               |
| 3     | -3    | 3     | 0     | 6   | 8   | 0.59040770E+05                |
| 3     | 3     | 3     | 1     | 0   | 8   | 0.26847699E+03                |
| 3     | 3     | 3     | -1    | 0   | 8   | -0.26847699E+03               |

continued on next page

| $L_A$ | $K_A$ | $L_B$ | $K_B$ | $L$ | $N$ | $C_{L_A, K_A, L_B, K_B, L}^N$ |
|-------|-------|-------|-------|-----|-----|-------------------------------|
| 3     | -3    | 3     | 1     | 0   | 8   | -0.26847699E+03               |
| 3     | -3    | 3     | -1    | 0   | 8   | 0.26847699E+03                |
| 3     | 3     | 3     | 1     | 2   | 8   | -0.41592280E+03               |
| 3     | 3     | 3     | -1    | 2   | 8   | 0.41592280E+03                |
| 3     | -3    | 3     | 1     | 2   | 8   | 0.41592280E+03                |
| 3     | -3    | 3     | -1    | 2   | 8   | -0.41592280E+03               |
| 3     | 3     | 3     | 1     | 4   | 8   | -0.19461426E+04               |
| 3     | 3     | 3     | -1    | 4   | 8   | 0.19461426E+04                |
| 3     | -3    | 3     | 1     | 4   | 8   | 0.19461426E+04                |
| 3     | -3    | 3     | -1    | 4   | 8   | -0.19461426E+04               |
| 3     | 3     | 3     | 1     | 6   | 8   | -0.60663050E+05               |
| 3     | 3     | 3     | -1    | 6   | 8   | 0.60663050E+05                |
| 3     | -3    | 3     | 1     | 6   | 8   | 0.60663050E+05                |
| 3     | -3    | 3     | -1    | 6   | 8   | -0.60663050E+05               |
| 3     | 3     | 3     | 2     | 0   | 8   | -0.25124798E+02               |
| 3     | 3     | 3     | -2    | 0   | 8   | -0.25124798E+02               |
| 3     | -3    | 3     | 2     | 0   | 8   | 0.25124798E+02                |
| 3     | -3    | 3     | -2    | 0   | 8   | 0.25124798E+02                |
| 3     | 3     | 3     | 2     | 2   | 8   | 0.38923164E+02                |
| 3     | 3     | 3     | -2    | 2   | 8   | 0.38923164E+02                |
| 3     | -3    | 3     | 2     | 2   | 8   | -0.38923164E+02               |
| 3     | -3    | 3     | -2    | 2   | 8   | -0.38923164E+02               |
| 3     | 3     | 3     | 2     | 4   | 8   | 0.18212529E+03                |
| 3     | 3     | 3     | -2    | 4   | 8   | 0.18212529E+03                |
| 3     | -3    | 3     | 2     | 4   | 8   | -0.18212529E+03               |
| 3     | -3    | 3     | -2    | 4   | 8   | -0.18212529E+03               |
| 3     | 3     | 3     | 2     | 6   | 8   | 0.56770120E+04                |
| 3     | 3     | 3     | -2    | 6   | 8   | 0.56770120E+04                |
| 3     | -3    | 3     | 2     | 6   | 8   | -0.56770120E+04               |
| 3     | -3    | 3     | -2    | 6   | 8   | -0.56770120E+04               |
| 3     | 3     | 3     | 3     | 0   | 8   | -0.90241100E+02               |
| 3     | 3     | 3     | -3    | 0   | 8   | 0.90241100E+02                |
| 3     | -3    | 3     | 3     | 0   | 8   | 0.90241100E+02                |
| 3     | -3    | 3     | -3    | 0   | 8   | -0.90241100E+02               |
| 3     | 3     | 3     | 3     | 2   | 8   | 0.13980092E+03                |
| 3     | 3     | 3     | -3    | 2   | 8   | -0.13980092E+03               |
| 3     | -3    | 3     | 3     | 2   | 8   | -0.13980092E+03               |
| 3     | -3    | 3     | -3    | 2   | 8   | 0.13980092E+03                |
| 3     | 3     | 3     | 3     | 4   | 8   | 0.65414180E+03                |
| 3     | 3     | 3     | -3    | 4   | 8   | -0.65414180E+03               |
| 3     | -3    | 3     | 3     | 4   | 8   | -0.65414180E+03               |
| 3     | -3    | 3     | -3    | 4   | 8   | 0.65414180E+03                |
| 3     | 3     | 3     | 3     | 6   | 8   | 0.20390200E+05                |
| 3     | 3     | 3     | -3    | 6   | 8   | -0.20390200E+05               |
| 3     | -3    | 3     | 3     | 6   | 8   | -0.20390200E+05               |
| 3     | -3    | 3     | -3    | 6   | 8   | 0.20390200E+05                |
| 4     | 0     | 0     | 0     | 4   | 8   | -0.10578777E+05               |
| 4     | 0     | 2     | 0     | 2   | 8   | -0.75483960E+02               |
| 4     | 0     | 2     | 0     | 4   | 8   | -0.61250530E+03               |
| 4     | 0     | 2     | 0     | 6   | 8   | -0.23207920E+04               |
| 4     | 0     | 2     | 1     | 2   | 8   | -0.43118140E+02               |
| 4     | 0     | 2     | -1    | 2   | 8   | 0.43118140E+02                |
| 4     | 0     | 2     | 1     | 4   | 8   | -0.32819280E+03               |
| 4     | 0     | 2     | -1    | 4   | 8   | 0.32819280E+03                |
| 4     | 0     | 2     | 1     | 6   | 8   | -0.14143400E+04               |
| 4     | 0     | 2     | -1    | 6   | 8   | 0.14143400E+04                |
| 4     | 0     | 2     | 2     | 2   | 8   | -0.18633907E+02               |
| 4     | 0     | 2     | -2    | 2   | 8   | -0.18633907E+02               |
| 4     | 0     | 2     | 2     | 4   | 8   | 0.71386440E+02                |
| 4     | 0     | 2     | -2    | 4   | 8   | 0.71386440E+02                |
| 4     | 0     | 2     | 2     | 6   | 8   | -0.14829214E+04               |
| 4     | 0     | 2     | -2    | 6   | 8   | -0.14829214E+04               |
| 4     | 1     | 0     | 0     | 4   | 8   | -0.52735050E+05               |
| 4     | -1    | 0     | 0     | 4   | 8   | 0.52735050E+05                |
| 4     | 1     | 2     | 0     | 2   | 8   | 0.25673252E+04                |
| 4     | -1    | 2     | 0     | 2   | 8   | -0.25673252E+04               |

continued on next page

| $L_A$ | $K_A$ | $L_B$ | $K_B$ | $L$ | $N$ | $C_{L_A, K_A, L_B, K_B, L}^N$ |
|-------|-------|-------|-------|-----|-----|-------------------------------|
| 4     | 1     | 2     | 0     | 4   | 8   | 0.49064401E+04                |
| 4     | -1    | 2     | 0     | 4   | 8   | -0.49064401E+04               |
| 4     | 1     | 2     | 0     | 6   | 8   | 0.14404340E+06                |
| 4     | -1    | 2     | 0     | 6   | 8   | -0.14404340E+06               |
| 4     | 1     | 2     | 1     | 2   | 8   | 0.14134371E+04                |
| 4     | 1     | 2     | -1    | 2   | 8   | -0.14134371E+04               |
| 4     | -1    | 2     | 1     | 2   | 8   | -0.14134371E+04               |
| 4     | -1    | 2     | -1    | 2   | 8   | 0.14134371E+04                |
| 4     | 1     | 2     | 1     | 4   | 8   | 0.27421679E+04                |
| 4     | 1     | 2     | -1    | 4   | 8   | -0.27421679E+04               |
| 4     | -1    | 2     | 1     | 4   | 8   | -0.27421679E+04               |
| 4     | -1    | 2     | -1    | 4   | 8   | 0.27421679E+04                |
| 4     | 1     | 2     | 1     | 6   | 8   | 0.79135510E+05                |
| 4     | 1     | 2     | -1    | 6   | 8   | -0.79135510E+05               |
| 4     | -1    | 2     | 1     | 6   | 8   | -0.79135510E+05               |
| 4     | -1    | 2     | -1    | 6   | 8   | 0.79135510E+05                |
| 4     | 1     | 2     | 2     | 2   | 8   | 0.88926700E+02                |
| 4     | 1     | 2     | -2    | 2   | 8   | 0.88926700E+02                |
| 4     | -1    | 2     | 2     | 2   | 8   | -0.88926700E+02               |
| 4     | -1    | 2     | -2    | 2   | 8   | -0.88926700E+02               |
| 4     | 1     | 2     | 2     | 4   | 8   | 0.59013929E+03                |
| 4     | 1     | 2     | -2    | 4   | 8   | 0.59013929E+03                |
| 4     | -1    | 2     | 2     | 4   | 8   | -0.59013929E+03               |
| 4     | -1    | 2     | -2    | 4   | 8   | -0.59013929E+03               |
| 4     | 1     | 2     | 2     | 6   | 8   | 0.32714800E+04                |
| 4     | 1     | 2     | -2    | 6   | 8   | 0.32714800E+04                |
| 4     | -1    | 2     | 2     | 6   | 8   | -0.32714800E+04               |
| 4     | -1    | 2     | -2    | 6   | 8   | -0.32714800E+04               |
| 4     | 2     | 0     | 0     | 4   | 8   | -0.11082803E+06               |
| 4     | -2    | 0     | 0     | 4   | 8   | -0.11082803E+06               |
| 4     | 2     | 2     | 0     | 2   | 8   | -0.99752460E+03               |
| 4     | -2    | 2     | 0     | 2   | 8   | -0.99752460E+03               |
| 4     | 2     | 2     | 0     | 4   | 8   | -0.28115910E+04               |
| 4     | -2    | 2     | 0     | 4   | 8   | -0.28115910E+04               |
| 4     | 2     | 2     | 0     | 6   | 8   | -0.52266730E+05               |
| 4     | -2    | 2     | 0     | 6   | 8   | -0.52266730E+05               |
| 4     | 2     | 2     | 1     | 2   | 8   | -0.59110350E+03               |
| 4     | 2     | 2     | -1    | 2   | 8   | 0.59110350E+03                |
| 4     | -2    | 2     | 1     | 2   | 8   | -0.59110350E+03               |
| 4     | -2    | 2     | -1    | 2   | 8   | 0.59110350E+03                |
| 4     | 2     | 2     | 1     | 4   | 8   | -0.16270347E+04               |
| 4     | 2     | 2     | -1    | 4   | 8   | 0.16270347E+04                |
| 4     | -2    | 2     | 1     | 4   | 8   | -0.16270347E+04               |
| 4     | -2    | 2     | -1    | 4   | 8   | 0.16270347E+04                |
| 4     | 2     | 2     | 1     | 6   | 8   | -0.31131270E+05               |
| 4     | 2     | 2     | -1    | 6   | 8   | 0.31131270E+05                |
| 4     | -2    | 2     | 1     | 6   | 8   | -0.31131270E+05               |
| 4     | -2    | 2     | -1    | 6   | 8   | 0.31131270E+05                |
| 4     | 2     | 2     | 2     | 2   | 8   | -0.46483900E+03               |
| 4     | 2     | 2     | -2    | 2   | 8   | -0.46483900E+03               |
| 4     | -2    | 2     | 2     | 2   | 8   | -0.46483900E+03               |
| 4     | -2    | 2     | -2    | 2   | 8   | -0.46483900E+03               |
| 4     | 2     | 2     | 2     | 4   | 8   | -0.90952960E+03               |
| 4     | 2     | 2     | -2    | 4   | 8   | -0.90952960E+03               |
| 4     | -2    | 2     | 2     | 4   | 8   | -0.90952960E+03               |
| 4     | -2    | 2     | -2    | 4   | 8   | -0.90952960E+03               |
| 4     | 2     | 2     | 2     | 6   | 8   | -0.25993870E+05               |
| 4     | 2     | 2     | -2    | 6   | 8   | -0.25993870E+05               |
| 4     | -2    | 2     | 2     | 6   | 8   | -0.25993870E+05               |
| 4     | -2    | 2     | -2    | 6   | 8   | -0.25993870E+05               |
| 4     | 3     | 0     | 0     | 4   | 8   | 0.26197750E+05                |
| 4     | -3    | 0     | 0     | 4   | 8   | -0.26197750E+05               |
| 4     | 3     | 2     | 0     | 2   | 8   | 0.14912410E+03                |
| 4     | -3    | 2     | 0     | 2   | 8   | -0.14912410E+03               |
| 4     | 3     | 2     | 0     | 4   | 8   | 0.77832717E+03                |
| 4     | -3    | 2     | 0     | 4   | 8   | -0.77832717E+03               |

continued on next page

Induction coefficients continued from previous page

| $L_A$ | $K_A$ | $L_B$ | $K_B$ | $L$ | $N$ | $C_{L_A, K_A, L_B, K_B, L}^N$ |
|-------|-------|-------|-------|-----|-----|-------------------------------|
| 4     | 3     | 2     | 0     | 6   | 8   | 0.63499040E+04                |
| 4     | -3    | 2     | 0     | 6   | 8   | -0.63499040E+04               |
| 4     | 3     | 2     | 1     | 2   | 8   | 0.90197110E+02                |
| 4     | 3     | 2     | -1    | 2   | 8   | -0.90197110E+02               |
| 4     | -3    | 2     | 1     | 2   | 8   | -0.90197110E+02               |
| 4     | -3    | 2     | -1    | 2   | 8   | 0.90197110E+02                |
| 4     | 3     | 2     | 1     | 4   | 8   | 0.43669843E+03                |
| 4     | 3     | 2     | -1    | 4   | 8   | -0.43669843E+03               |
| 4     | -3    | 2     | 1     | 4   | 8   | -0.43669843E+03               |
| 4     | -3    | 2     | -1    | 4   | 8   | 0.43669843E+03                |
| 4     | 3     | 2     | 1     | 6   | 8   | 0.39800050E+04                |
| 4     | 3     | 2     | -1    | 6   | 8   | -0.39800050E+04               |
| 4     | -3    | 2     | 1     | 6   | 8   | -0.39800050E+04               |
| 4     | -3    | 2     | -1    | 6   | 8   | 0.39800050E+04                |
| 4     | 3     | 2     | 2     | 2   | 8   | 0.88282300E+02                |
| 4     | 3     | 2     | -2    | 2   | 8   | 0.88282300E+02                |
| 4     | -3    | 2     | 2     | 2   | 8   | -0.88282300E+02               |
| 4     | -3    | 2     | -2    | 2   | 8   | -0.88282300E+02               |
| 4     | 3     | 2     | 2     | 4   | 8   | 0.11104586E+03                |
| 4     | 3     | 2     | -2    | 4   | 8   | 0.11104586E+03                |
| 4     | -3    | 2     | 2     | 4   | 8   | -0.11104586E+03               |
| 4     | -3    | 2     | -2    | 4   | 8   | -0.11104586E+03               |
| 4     | 3     | 2     | 2     | 6   | 8   | 0.51889790E+04                |
| 4     | 3     | 2     | -2    | 6   | 8   | 0.51889790E+04                |
| 4     | -3    | 2     | 2     | 6   | 8   | -0.51889790E+04               |
| 4     | -3    | 2     | -2    | 6   | 8   | -0.51889790E+04               |
| 4     | 4     | 0     | 0     | 4   | 8   | 0.42428276E+05                |
| 4     | -4    | 0     | 0     | 4   | 8   | 0.42428276E+05                |
| 4     | 4     | 2     | 0     | 2   | 8   | 0.51110100E+02                |
| 4     | -4    | 2     | 0     | 2   | 8   | 0.51110100E+02                |
| 4     | 4     | 2     | 0     | 4   | 8   | 0.23412950E+03                |
| 4     | -4    | 2     | 0     | 4   | 8   | 0.23412950E+03                |
| 4     | 4     | 2     | 0     | 6   | 8   | 0.23097400E+04                |
| 4     | -4    | 2     | 0     | 6   | 8   | 0.23097400E+04                |
| 4     | 4     | 2     | 1     | 2   | 8   | 0.43174400E+02                |
| 4     | 4     | 2     | -1    | 2   | 8   | -0.43174400E+02               |
| 4     | -4    | 2     | 1     | 2   | 8   | 0.43174400E+02                |
| 4     | -4    | 2     | -1    | 2   | 8   | -0.43174400E+02               |
| 4     | 4     | 2     | 1     | 4   | 8   | 0.15881460E+03                |
| 4     | 4     | 2     | -1    | 4   | 8   | -0.15881460E+03               |
| 4     | -4    | 2     | 1     | 4   | 8   | 0.15881460E+03                |
| 4     | -4    | 2     | -1    | 4   | 8   | -0.15881460E+03               |
| 4     | 4     | 2     | 1     | 6   | 8   | 0.21104090E+04                |
| 4     | 4     | 2     | -1    | 6   | 8   | -0.21104090E+04               |
| 4     | -4    | 2     | 1     | 6   | 8   | 0.21104090E+04                |
| 4     | -4    | 2     | -1    | 6   | 8   | -0.21104090E+04               |
| 4     | 4     | 2     | 2     | 2   | 8   | 0.15611345E+03                |
| 4     | 4     | 2     | -2    | 2   | 8   | 0.15611345E+03                |
| 4     | -4    | 2     | 2     | 2   | 8   | 0.15611345E+03                |
| 4     | -4    | 2     | -2    | 2   | 8   | 0.15611345E+03                |
| 4     | 4     | 2     | 2     | 4   | 8   | 0.31518824E+03                |
| 4     | 4     | 2     | -2    | 4   | 8   | 0.31518824E+03                |
| 4     | -4    | 2     | 2     | 4   | 8   | 0.31518824E+03                |
| 4     | -4    | 2     | -2    | 4   | 8   | 0.31518824E+03                |
| 4     | 4     | 2     | 2     | 6   | 8   | 0.86901180E+04                |
| 4     | 4     | 2     | -2    | 6   | 8   | 0.86901180E+04                |
| 4     | -4    | 2     | 2     | 6   | 8   | 0.86901180E+04                |
| 4     | -4    | 2     | -2    | 6   | 8   | 0.86901180E+04                |

TABLE VIII: Dispersion asymptotic coefficients of RDX (in atomic units).

| $L_A$ | $K_A$ | $L_B$ | $K_B$ | $L$ | $N$ | $C_{L_A, K_A, L_B, K_B, L}^N$ |
|-------|-------|-------|-------|-----|-----|-------------------------------|
| 0     | 0     | 0     | 0     | 0   | 6   | 5.501645974241E+03            |
| 0     | 0     | 2     | 0     | 2   | 6   | -6.112371471096E+02           |

continued on next page

| $L_A$ | $K_A$ | $L_B$ | $K_B$ | $L$ | $N$ | $C_{L_A, K_A, L_B, K_B, L}^N$ |
|-------|-------|-------|-------|-----|-----|-------------------------------|
| 0     | 0     | 2     | -1    | 2   | 6   | 2.999279199474E+02            |
| 0     | 0     | 2     | 1     | 2   | 6   | -2.999279199474E+02           |
| 0     | 0     | 2     | -2    | 2   | 6   | 1.999827237294E+02            |
| 0     | 0     | 2     | 2     | 2   | 6   | 1.999827237294E+02            |
| 2     | 0     | 0     | 0     | 2   | 6   | -6.112371471096E+02           |
| 2     | 0     | 2     | 0     | 0   | 6   | 6.457556223243E+00            |
| 2     | 0     | 2     | 0     | 2   | 6   | 1.725854495943E+01            |
| 2     | 0     | 2     | 0     | 4   | 6   | 1.863922855619E+02            |
| 2     | 0     | 2     | -1    | 0   | 6   | -3.193852491857E+00           |
| 2     | 0     | 2     | 1     | 0   | 6   | 3.193852491857E+00            |
| 2     | 0     | 2     | -1    | 2   | 6   | -8.535929834587E+00           |
| 2     | 0     | 2     | 1     | 2   | 6   | 8.535929834587E+00            |
| 2     | 0     | 2     | -1    | 4   | 6   | -9.218804221354E+01           |
| 2     | 0     | 2     | 1     | 4   | 6   | 9.218804221354E+01            |
| 2     | 0     | 2     | -2    | 0   | 6   | -2.161748447720E+00           |
| 2     | 0     | 2     | 2     | 0   | 6   | -2.161748447720E+00           |
| 2     | 0     | 2     | -2    | 2   | 6   | -5.777515748400E+00           |
| 2     | 0     | 2     | 2     | 2   | 6   | -5.777515748400E+00           |
| 2     | 0     | 2     | -2    | 4   | 6   | -6.239717008272E+01           |
| 2     | 0     | 2     | 2     | 4   | 6   | -6.239717008272E+01           |
| 2     | -1    | 0     | 0     | 2   | 6   | 2.999279199474E+02            |
| 2     | 1     | 0     | 0     | 2   | 6   | -2.999279199474E+02           |
| 2     | -1    | 2     | 0     | 0   | 6   | -3.193852491857E+00           |
| 2     | 1     | 2     | 0     | 0   | 6   | 3.193852491857E+00            |
| 2     | -1    | 2     | 0     | 2   | 6   | -8.535929834587E+00           |
| 2     | 1     | 2     | 0     | 2   | 6   | 8.535929834587E+00            |
| 2     | -1    | 2     | 0     | 4   | 6   | -9.218804221354E+01           |
| 2     | 1     | 2     | 0     | 4   | 6   | 9.218804221354E+01            |
| 2     | -1    | 2     | -1    | 0   | 6   | 1.581829912102E+00            |
| 2     | -1    | 2     | 1     | 0   | 6   | -1.581829912102E+00           |
| 2     | 1     | 2     | -1    | 0   | 6   | -1.581829912102E+00           |
| 2     | 1     | 2     | 1     | 0   | 6   | 1.581829912102E+00            |
| 2     | -1    | 2     | -1    | 2   | 6   | 4.227618268027E+00            |
| 2     | -1    | 2     | 1     | 2   | 6   | -4.227618268027E+00           |
| 2     | 1     | 2     | -1    | 2   | 6   | -4.227618268027E+00           |
| 2     | 1     | 2     | 1     | 2   | 6   | 4.227618268027E+00            |
| 2     | -1    | 2     | -1    | 4   | 6   | 4.565827729469E+01            |
| 2     | -1    | 2     | 1     | 4   | 6   | -4.565827729469E+01           |
| 2     | 1     | 2     | -1    | 4   | 6   | -4.565827729469E+01           |
| 2     | 1     | 2     | 1     | 4   | 6   | 4.565827729469E+01            |
| 2     | -1    | 2     | -2    | 0   | 6   | 1.073935188518E+00            |
| 2     | -1    | 2     | 2     | 0   | 6   | 1.073935188518E+00            |
| 2     | 1     | 2     | -2    | 0   | 6   | -1.073935188518E+00           |
| 2     | 1     | 2     | 2     | 0   | 6   | -1.073935188518E+00           |
| 2     | -1    | 2     | -2    | 2   | 6   | 2.870212522168E+00            |
| 2     | -1    | 2     | 2     | 2   | 6   | 2.870212522168E+00            |
| 2     | 1     | 2     | -2    | 2   | 6   | -2.870212522168E+00           |
| 2     | 1     | 2     | 2     | 2   | 6   | -2.870212522168E+00           |
| 2     | -1    | 2     | -2    | 4   | 6   | 3.099829523942E+01            |
| 2     | -1    | 2     | 2     | 4   | 6   | 3.099829523942E+01            |
| 2     | 1     | 2     | -2    | 4   | 6   | -3.099829523942E+01           |
| 2     | 1     | 2     | 2     | 4   | 6   | -3.099829523942E+01           |
| 2     | -2    | 0     | 0     | 2   | 6   | 1.999827237294E+02            |
| 2     | 2     | 0     | 0     | 2   | 6   | 1.999827237294E+02            |
| 2     | -2    | 2     | 0     | 0   | 6   | -2.161748447720E+00           |
| 2     | 2     | 2     | 0     | 0   | 6   | -2.161748447720E+00           |
| 2     | -2    | 2     | 0     | 2   | 6   | -5.777515748400E+00           |
| 2     | 2     | 2     | 0     | 2   | 6   | -5.777515748400E+00           |
| 2     | -2    | 2     | 0     | 4   | 6   | -6.239717008272E+01           |
| 2     | 2     | 2     | 0     | 4   | 6   | -6.239717008272E+01           |
| 2     | -2    | 2     | -1    | 0   | 6   | 1.073935188518E+00            |
| 2     | -2    | 2     | 1     | 0   | 6   | -1.073935188518E+00           |
| 2     | 2     | 2     | -1    | 0   | 6   | 1.073935188518E+00            |
| 2     | 2     | 2     | 1     | 0   | 6   | -1.073935188518E+00           |
| 2     | -2    | 2     | -1    | 2   | 6   | 2.870212522168E+00            |
| 2     | -2    | 2     | 1     | 2   | 6   | -2.870212522168E+00           |

continued on next page

| $L_A$ | $K_A$ | $L_B$ | $K_B$ | $L$ | $N$ | $C_{L_A, K_A, L_B, K_B, L}^N$ |
|-------|-------|-------|-------|-----|-----|-------------------------------|
| 2     | 2     | 2     | -1    | 2   | 6   | 2.870212522168E+00            |
| 2     | 2     | 2     | 1     | 2   | 6   | -2.870212522168E+00           |
| 2     | -2    | 2     | -1    | 4   | 6   | 3.099829523942E+01            |
| 2     | -2    | 2     | 1     | 4   | 6   | -3.099829523942E+01           |
| 2     | 2     | 2     | -1    | 4   | 6   | 3.099829523942E+01            |
| 2     | 2     | 2     | 1     | 4   | 6   | -3.099829523942E+01           |
| 2     | -2    | 2     | -2    | 0   | 6   | 7.352709905888E-01            |
| 2     | -2    | 2     | 2     | 0   | 6   | 7.352709905888E-01            |
| 2     | 2     | 2     | -2    | 0   | 6   | 7.352709905888E-01            |
| 2     | 2     | 2     | 2     | 0   | 6   | 7.352709905888E-01            |
| 2     | -2    | 2     | -2    | 2   | 6   | 1.965094380869E+00            |
| 2     | -2    | 2     | 2     | 2   | 6   | 1.965094380869E+00            |
| 2     | 2     | 2     | -2    | 2   | 6   | 1.965094380869E+00            |
| 2     | 2     | 2     | 2     | 2   | 6   | 1.965094380869E+00            |
| 2     | -2    | 2     | -2    | 4   | 6   | 2.122301931339E+01            |
| 2     | -2    | 2     | 2     | 4   | 6   | 2.122301931339E+01            |
| 2     | 2     | 2     | -2    | 4   | 6   | 2.122301931339E+01            |
| 2     | 2     | 2     | 2     | 4   | 6   | 2.122301931339E+01            |
| 0     | 0     | 1     | 0     | 1   | 7   | -1.397864754960E+04           |
| 0     | 0     | 1     | -1    | 1   | 7   | 5.957737809504E+02            |
| 0     | 0     | 1     | 1     | 1   | 7   | -5.957737809504E+02           |
| 0     | 0     | 3     | 0     | 3   | 7   | -1.052573840119E+04           |
| 0     | 0     | 3     | -1    | 3   | 7   | 1.231242840184E+04            |
| 0     | 0     | 3     | 1     | 3   | 7   | -1.231242840184E+04           |
| 0     | 0     | 3     | -2    | 3   | 7   | -1.793485608365E+03           |
| 0     | 0     | 3     | 2     | 3   | 7   | -1.793485608365E+03           |
| 0     | 0     | 3     | -3    | 3   | 7   | 7.612885882146E+03            |
| 0     | 0     | 3     | 3     | 3   | 7   | -7.612885882146E+03           |
| 1     | 0     | 0     | 0     | 1   | 7   | 1.397864754960E+04            |
| 1     | 0     | 2     | 0     | 1   | 7   | 2.210714490960E+02            |
| 1     | 0     | 2     | 0     | 3   | 7   | -1.102898160687E+03           |
| 1     | 0     | 2     | -1    | 1   | 7   | -1.083398566479E+02           |
| 1     | 0     | 2     | 1     | 1   | 7   | 1.083398566479E+02            |
| 1     | 0     | 2     | -1    | 3   | 7   | 5.404941665448E+02            |
| 1     | 0     | 2     | 1     | 3   | 7   | -5.404941665448E+02           |
| 1     | 0     | 2     | -2    | 1   | 7   | -7.175435619545E+01           |
| 1     | 0     | 2     | 2     | 1   | 7   | -7.175435619545E+01           |
| 1     | 0     | 2     | -2    | 3   | 7   | 3.579736225226E+02            |
| 1     | 0     | 2     | 2     | 3   | 7   | 3.579736225226E+02            |
| 1     | -1    | 0     | 0     | 1   | 7   | -5.957737809504E+02           |
| 1     | 1     | 0     | 0     | 1   | 7   | 5.957737809504E+02            |
| 1     | -1    | 2     | 0     | 1   | 7   | -5.119772481664E+00           |
| 1     | 1     | 2     | 0     | 1   | 7   | 5.119772481664E+00            |
| 1     | -1    | 2     | 0     | 3   | 7   | 2.554191269949E+01            |
| 1     | 1     | 2     | 0     | 3   | 7   | -2.554191269949E+01           |
| 1     | -1    | 2     | -1    | 1   | 7   | 2.102947750917E+00            |
| 1     | -1    | 2     | 1     | 1   | 7   | -2.102947750917E+00           |
| 1     | 1     | 2     | -1    | 1   | 7   | -2.102947750917E+00           |
| 1     | 1     | 2     | 1     | 1   | 7   | 2.102947750917E+00            |
| 1     | -1    | 2     | -1    | 3   | 7   | -1.049134664829E+01           |
| 1     | -1    | 2     | 1     | 3   | 7   | 1.049134664829E+01            |
| 1     | 1     | 2     | -1    | 3   | 7   | 1.049134664829E+01            |
| 1     | 1     | 2     | 1     | 3   | 7   | -1.049134664829E+01           |
| 1     | -1    | 2     | -2    | 1   | 7   | 6.973567698476E-01            |
| 1     | -1    | 2     | 2     | 1   | 7   | 6.973567698476E-01            |
| 1     | 1     | 2     | -2    | 1   | 7   | -6.973567698476E-01           |
| 1     | 1     | 2     | 2     | 1   | 7   | -6.973567698476E-01           |
| 1     | -1    | 2     | -2    | 3   | 7   | -3.479026812156E+00           |
| 1     | -1    | 2     | 2     | 3   | 7   | -3.479026812156E+00           |
| 1     | 1     | 2     | -2    | 3   | 7   | 3.479026812156E+00            |
| 1     | 1     | 2     | 2     | 3   | 7   | 3.479026812156E+00            |
| 2     | 0     | 1     | 0     | 1   | 7   | -2.210714490960E+02           |
| 2     | 0     | 1     | 0     | 3   | 7   | 1.102898160687E+03            |
| 2     | 0     | 1     | -1    | 1   | 7   | 5.119772481664E+00            |
| 2     | 0     | 1     | 1     | 1   | 7   | -5.119772481664E+00           |
| 2     | 0     | 1     | -1    | 3   | 7   | -2.554191269949E+01           |

continued on next page

| $L_A$ | $K_A$ | $L_B$ | $K_B$ | $L$ | $N$ | $C_{L_A, K_A, L_B, K_B, L}^N$ |
|-------|-------|-------|-------|-----|-----|-------------------------------|
| 2     | 0     | 1     | 1     | 3   | 7   | 2.554191269949E+01            |
| 2     | 0     | 2     | -1    | 1   | 7   | 4.506666831563E+01            |
| 2     | 0     | 2     | 1     | 1   | 7   | 4.506666831563E+01            |
| 2     | 0     | 2     | -1    | 3   | 7   | 9.178729727814E+01            |
| 2     | 0     | 2     | 1     | 3   | 7   | 9.178729727814E+01            |
| 2     | 0     | 2     | -2    | 1   | 7   | -2.110189803985E+01           |
| 2     | 0     | 2     | 2     | 1   | 7   | 2.110189803985E+01            |
| 2     | 0     | 2     | -2    | 3   | 7   | -4.297824225549E+01           |
| 2     | 0     | 2     | 2     | 3   | 7   | 4.297824225549E+01            |
| 2     | 0     | 3     | 0     | 1   | 7   | 9.343047878588E+01            |
| 2     | 0     | 3     | 0     | 3   | 7   | 2.180044505004E+02            |
| 2     | 0     | 3     | 0     | 5   | 7   | 3.651898251209E+03            |
| 2     | 0     | 3     | -1    | 1   | 7   | -1.096475543327E+02           |
| 2     | 0     | 3     | 1     | 1   | 7   | 1.096475543327E+02            |
| 2     | 0     | 3     | -1    | 3   | 7   | -2.558442934429E+02           |
| 2     | 0     | 3     | 1     | 3   | 7   | 2.558442934429E+02            |
| 2     | 0     | 3     | -1    | 5   | 7   | -4.285771807235E+03           |
| 2     | 0     | 3     | 1     | 5   | 7   | 4.285771807235E+03            |
| 2     | 0     | 3     | -2    | 1   | 7   | 1.697724106617E+01            |
| 2     | 0     | 3     | 2     | 1   | 7   | 1.697724106617E+01            |
| 2     | 0     | 3     | -2    | 3   | 7   | 3.961356248774E+01            |
| 2     | 0     | 3     | 2     | 3   | 7   | 3.961356248774E+01            |
| 2     | 0     | 3     | -2    | 5   | 7   | 6.635859921258E+02            |
| 2     | 0     | 3     | 2     | 5   | 7   | 6.635859921258E+02            |
| 2     | 0     | 3     | -3    | 1   | 7   | -6.496787253885E+01           |
| 2     | 0     | 3     | 3     | 1   | 7   | 6.496787253885E+01            |
| 2     | 0     | 3     | -3    | 3   | 7   | -1.515917025907E+02           |
| 2     | 0     | 3     | 3     | 3   | 7   | 1.515917025907E+02            |
| 2     | 0     | 3     | -3    | 5   | 7   | -2.539386110320E+03           |
| 2     | 0     | 3     | 3     | 5   | 7   | 2.539386110320E+03            |
| 2     | -1    | 1     | 0     | 1   | 7   | 1.083398566479E+02            |
| 2     | 1     | 1     | 0     | 1   | 7   | -1.083398566479E+02           |
| 2     | -1    | 1     | 0     | 3   | 7   | -5.404941665448E+02           |
| 2     | 1     | 1     | 0     | 3   | 7   | 5.404941665448E+02            |
| 2     | -1    | 1     | -1    | 1   | 7   | -2.102947750917E+00           |
| 2     | -1    | 1     | 1     | 1   | 7   | 2.102947750917E+00            |
| 2     | 1     | 1     | -1    | 1   | 7   | 2.102947750917E+00            |
| 2     | 1     | 1     | 1     | 1   | 7   | -2.102947750917E+00           |
| 2     | -1    | 1     | -1    | 3   | 7   | 1.049134664829E+01            |
| 2     | -1    | 1     | 1     | 3   | 7   | -1.049134664829E+01           |
| 2     | 1     | 1     | -1    | 3   | 7   | -1.049134664829E+01           |
| 2     | 1     | 1     | 1     | 3   | 7   | 1.049134664829E+01            |
| 2     | -1    | 2     | 0     | 1   | 7   | 4.506666831563E+01            |
| 2     | 1     | 2     | 0     | 1   | 7   | 4.506666831563E+01            |
| 2     | -1    | 2     | 0     | 3   | 7   | 9.178729727814E+01            |
| 2     | 1     | 2     | 0     | 3   | 7   | 9.178729727814E+01            |
| 2     | -1    | 2     | -1    | 1   | 7   | -4.469465788971E+01           |
| 2     | 1     | 2     | 1     | 1   | 7   | 4.469465788971E+01            |
| 2     | -1    | 2     | -1    | 3   | 7   | -9.102962352878E+01           |
| 2     | 1     | 2     | 1     | 3   | 7   | 9.102962352878E+01            |
| 2     | -1    | 2     | 2     | 1   | 7   | -2.567343828140E+01           |
| 2     | 1     | 2     | -2    | 1   | 7   | -2.567343828140E+01           |
| 2     | -1    | 2     | -2    | 1   | 7   | -4.778854524584E+00           |
| 2     | 1     | 2     | 2     | 1   | 7   | -4.778854524584E+00           |
| 2     | -1    | 2     | 2     | 3   | 7   | -5.228909967747E+01           |
| 2     | 1     | 2     | -2    | 3   | 7   | -5.228909967747E+01           |
| 2     | -1    | 2     | -2    | 3   | 7   | -9.733094486262E+00           |
| 2     | 1     | 2     | 2     | 3   | 7   | -9.733094486262E+00           |
| 2     | -1    | 3     | 0     | 1   | 7   | -4.631956601945E+01           |
| 2     | 1     | 3     | 0     | 1   | 7   | 4.631956601945E+01            |
| 2     | -1    | 3     | 0     | 3   | 7   | -1.080789873787E+02           |
| 2     | 1     | 3     | 0     | 3   | 7   | 1.080789873787E+02            |
| 2     | -1    | 3     | 0     | 5   | 7   | -1.810483520382E+03           |
| 2     | 1     | 3     | 0     | 5   | 7   | 1.810483520382E+03            |
| 2     | -1    | 3     | -1    | 1   | 7   | 5.439434892052E+01            |
| 2     | -1    | 3     | 1     | 1   | 7   | -5.439434892052E+01           |

continued on next page

| $L_A$ | $K_A$ | $L_B$ | $K_B$ | $L$ | $N$ | $C_{L_A, K_A, L_B, K_B, L}^N$ |
|-------|-------|-------|-------|-----|-----|-------------------------------|
| 2     | 1     | 3     | -1    | 1   | 7   | -5.439434892052E+01           |
| 2     | 1     | 3     | 1     | 1   | 7   | 5.439434892052E+01            |
| 2     | -1    | 3     | -1    | 3   | 7   | 1.269201474812E+02            |
| 2     | -1    | 3     | 1     | 3   | 7   | -1.269201474812E+02           |
| 2     | 1     | 3     | -1    | 3   | 7   | -1.269201474812E+02           |
| 2     | 1     | 3     | 1     | 3   | 7   | 1.269201474812E+02            |
| 2     | -1    | 3     | -1    | 5   | 7   | 2.126100928518E+03            |
| 2     | -1    | 3     | 1     | 5   | 7   | -2.126100928518E+03           |
| 2     | 1     | 3     | -1    | 5   | 7   | -2.126100928518E+03           |
| 2     | 1     | 3     | 1     | 5   | 7   | 2.126100928518E+03            |
| 2     | -1    | 3     | -2    | 1   | 7   | -8.507378946648E+00           |
| 2     | -1    | 3     | 2     | 1   | 7   | -8.507378946648E+00           |
| 2     | 1     | 3     | -2    | 1   | 7   | 8.507378946648E+00            |
| 2     | 1     | 3     | 2     | 1   | 7   | 8.507378946648E+00            |
| 2     | -1    | 3     | -2    | 3   | 7   | -1.985055087551E+01           |
| 2     | -1    | 3     | 2     | 3   | 7   | -1.985055087551E+01           |
| 2     | 1     | 3     | -2    | 3   | 7   | 1.985055087551E+01            |
| 2     | 1     | 3     | 2     | 3   | 7   | 1.985055087551E+01            |
| 2     | -1    | 3     | -2    | 5   | 7   | -3.325262023846E+02           |
| 2     | -1    | 3     | 2     | 5   | 7   | -3.325262023846E+02           |
| 2     | 1     | 3     | -2    | 5   | 7   | 3.325262023846E+02            |
| 2     | 1     | 3     | 2     | 5   | 7   | 3.325262023846E+02            |
| 2     | -1    | 3     | -3    | 1   | 7   | 3.198082299599E+01            |
| 2     | -1    | 3     | 3     | 1   | 7   | -3.198082299599E+01           |
| 2     | 1     | 3     | -3    | 1   | 7   | -3.198082299599E+01           |
| 2     | 1     | 3     | 3     | 1   | 7   | 3.198082299599E+01            |
| 2     | -1    | 3     | -3    | 3   | 7   | 7.462192032398E+01            |
| 2     | -1    | 3     | 3     | 3   | 7   | -7.462192032398E+01           |
| 2     | 1     | 3     | -3    | 3   | 7   | -7.462192032398E+01           |
| 2     | 1     | 3     | 3     | 3   | 7   | 7.462192032398E+01            |
| 2     | -1    | 3     | -3    | 5   | 7   | 1.250027968271E+03            |
| 2     | -1    | 3     | 3     | 5   | 7   | -1.250027968271E+03           |
| 2     | 1     | 3     | -3    | 5   | 7   | -1.250027968271E+03           |
| 2     | 1     | 3     | 3     | 5   | 7   | 1.250027968271E+03            |
| 2     | -2    | 1     | 0     | 1   | 7   | 7.175435619545E+01            |
| 2     | 2     | 1     | 0     | 1   | 7   | 7.175435619545E+01            |
| 2     | -2    | 1     | 0     | 3   | 7   | -3.579736225226E+02           |
| 2     | 2     | 1     | 0     | 3   | 7   | -3.579736225226E+02           |
| 2     | -2    | 1     | -1    | 1   | 7   | -6.973567698476E-01           |
| 2     | -2    | 1     | 1     | 1   | 7   | 6.973567698476E-01            |
| 2     | 2     | 1     | -1    | 1   | 7   | -6.973567698476E-01           |
| 2     | 2     | 1     | 1     | 1   | 7   | 6.973567698476E-01            |
| 2     | -2    | 1     | -1    | 3   | 7   | 3.479026812156E+00            |
| 2     | -2    | 1     | 1     | 3   | 7   | -3.479026812156E+00           |
| 2     | 2     | 1     | -1    | 3   | 7   | 3.479026812156E+00            |
| 2     | 2     | 1     | 1     | 3   | 7   | -3.479026812156E+00           |
| 2     | -2    | 2     | 0     | 1   | 7   | -2.110189803985E+01           |
| 2     | 2     | 2     | 0     | 1   | 7   | 2.110189803985E+01            |
| 2     | -2    | 2     | 0     | 3   | 7   | -4.297824225549E+01           |
| 2     | 2     | 2     | 0     | 3   | 7   | 4.297824225549E+01            |
| 2     | -2    | 2     | 1     | 1   | 7   | -2.567343828140E+01           |
| 2     | 2     | 2     | -1    | 1   | 7   | -2.567343828140E+01           |
| 2     | -2    | 2     | -1    | 1   | 7   | -4.778854524584E+00           |
| 2     | 2     | 2     | 1     | 1   | 7   | -4.778854524584E+00           |
| 2     | -2    | 2     | 1     | 3   | 7   | -5.228909967747E+01           |
| 2     | 2     | 2     | -1    | 3   | 7   | -5.228909967747E+01           |
| 2     | -2    | 2     | -1    | 3   | 7   | -9.733094486262E+00           |
| 2     | 2     | 2     | 1     | 3   | 7   | -9.733094486262E+00           |
| 2     | -2    | 2     | -2    | 1   | 7   | 1.417527740238E+01            |
| 2     | 2     | 2     | 2     | 1   | 7   | -1.417527740238E+01           |
| 2     | -2    | 2     | -2    | 3   | 7   | 2.887079186373E+01            |
| 2     | 2     | 2     | 2     | 3   | 7   | -2.887079186373E+01           |
| 2     | -2    | 3     | 0     | 1   | 7   | -3.154702701092E+01           |
| 2     | 2     | 3     | 0     | 1   | 7   | -3.154702701092E+01           |
| 2     | -2    | 3     | 0     | 3   | 7   | -7.360972969214E+01           |
| 2     | 2     | 3     | 0     | 3   | 7   | -7.360972969214E+01           |

continued on next page

| $L_A$ | $K_A$ | $L_B$ | $K_B$ | $L$ | $N$ | $C_{L_A, K_A, L_B, K_B, L}^N$ |
|-------|-------|-------|-------|-----|-----|-------------------------------|
| 2     | -2    | 3     | 0     | 5   | 7   | -1.233072272230E+03           |
| 2     | 2     | 3     | 0     | 5   | 7   | -1.233072272230E+03           |
| 2     | -2    | 3     | -1    | 1   | 7   | 3.710398781225E+01            |
| 2     | -2    | 3     | 1     | 1   | 7   | -3.710398781225E+01           |
| 2     | 2     | 3     | -1    | 1   | 7   | 3.710398781225E+01            |
| 2     | 2     | 3     | 1     | 1   | 7   | -3.710398781225E+01           |
| 2     | -2    | 3     | -1    | 3   | 7   | 8.657597156192E+01            |
| 2     | -2    | 3     | 1     | 3   | 7   | -8.657597156192E+01           |
| 2     | 2     | 3     | -1    | 3   | 7   | 8.657597156192E+01            |
| 2     | 2     | 3     | 1     | 3   | 7   | -8.657597156192E+01           |
| 2     | -2    | 3     | -1    | 5   | 7   | 1.450276076557E+03            |
| 2     | -2    | 3     | 1     | 5   | 7   | -1.450276076557E+03           |
| 2     | 2     | 3     | -1    | 5   | 7   | 1.450276076557E+03            |
| 2     | 2     | 3     | 1     | 5   | 7   | -1.450276076557E+03           |
| 2     | -2    | 3     | -2    | 1   | 7   | -5.935893554937E+00           |
| 2     | -2    | 3     | 2     | 1   | 7   | -5.935893554937E+00           |
| 2     | 2     | 3     | -2    | 1   | 7   | -5.935893554937E+00           |
| 2     | 2     | 3     | 2     | 1   | 7   | -5.935893554937E+00           |
| 2     | -2    | 3     | -2    | 3   | 7   | -1.385041829485E+01           |
| 2     | -2    | 3     | 2     | 3   | 7   | -1.385041829485E+01           |
| 2     | 2     | 3     | -2    | 3   | 7   | -1.385041829485E+01           |
| 2     | 2     | 3     | 2     | 3   | 7   | -1.385041829485E+01           |
| 2     | -2    | 3     | -2    | 5   | 7   | -2.320150723226E+02           |
| 2     | -2    | 3     | 2     | 5   | 7   | -2.320150723226E+02           |
| 2     | 2     | 3     | -2    | 5   | 7   | -2.320150723226E+02           |
| 2     | 2     | 3     | 2     | 5   | 7   | -2.320150723226E+02           |
| 2     | -2    | 3     | -3    | 1   | 7   | 2.140935773471E+01            |
| 2     | -2    | 3     | 3     | 1   | 7   | -2.140935773471E+01           |
| 2     | 2     | 3     | -3    | 1   | 7   | 2.140935773471E+01            |
| 2     | 2     | 3     | 3     | 1   | 7   | -2.140935773471E+01           |
| 2     | -2    | 3     | -3    | 3   | 7   | 4.995516804766E+01            |
| 2     | -2    | 3     | 3     | 3   | 7   | -4.995516804766E+01           |
| 2     | 2     | 3     | -3    | 3   | 7   | 4.995516804766E+01            |
| 2     | 2     | 3     | 3     | 3   | 7   | -4.995516804766E+01           |
| 2     | -2    | 3     | -3    | 5   | 7   | 8.368232410548E+02            |
| 2     | -2    | 3     | 3     | 5   | 7   | -8.368232410548E+02           |
| 2     | 2     | 3     | -3    | 5   | 7   | 8.368232410548E+02            |
| 2     | 2     | 3     | 3     | 5   | 7   | -8.368232410548E+02           |
| 3     | 0     | 0     | 0     | 3   | 7   | 1.052573840119E+04            |
| 3     | 0     | 2     | 0     | 1   | 7   | -9.343047878588E+01           |
| 3     | 0     | 2     | 0     | 3   | 7   | -2.180044505004E+02           |
| 3     | 0     | 2     | 0     | 5   | 7   | -3.651898251209E+03           |
| 3     | 0     | 2     | -1    | 1   | 7   | 4.631956601945E+01            |
| 3     | 0     | 2     | 1     | 1   | 7   | -4.631956601945E+01           |
| 3     | 0     | 2     | -1    | 3   | 7   | 1.080789873787E+02            |
| 3     | 0     | 2     | 1     | 3   | 7   | -1.080789873787E+02           |
| 3     | 0     | 2     | -1    | 5   | 7   | 1.810483520382E+03            |
| 3     | 0     | 2     | 1     | 5   | 7   | -1.810483520382E+03           |
| 3     | 0     | 2     | -2    | 1   | 7   | 3.154702701092E+01            |
| 3     | 0     | 2     | 2     | 1   | 7   | 3.154702701092E+01            |
| 3     | 0     | 2     | -2    | 3   | 7   | 7.360972969214E+01            |
| 3     | 0     | 2     | 2     | 3   | 7   | 7.360972969214E+01            |
| 3     | 0     | 2     | -2    | 5   | 7   | 1.233072272230E+03            |
| 3     | 0     | 2     | 2     | 5   | 7   | 1.233072272230E+03            |
| 3     | -1    | 0     | 0     | 3   | 7   | -1.231242840184E+04           |
| 3     | 1     | 0     | 0     | 3   | 7   | 1.231242840184E+04            |
| 3     | -1    | 2     | 0     | 1   | 7   | 1.096475543327E+02            |
| 3     | 1     | 2     | 0     | 1   | 7   | -1.096475543327E+02           |
| 3     | -1    | 2     | 0     | 3   | 7   | 2.558442934429E+02            |
| 3     | 1     | 2     | 0     | 3   | 7   | -2.558442934429E+02           |
| 3     | -1    | 2     | 0     | 5   | 7   | 4.285771807235E+03            |
| 3     | 1     | 2     | 0     | 5   | 7   | -4.285771807235E+03           |
| 3     | -1    | 2     | -1    | 1   | 7   | -5.439434892052E+01           |
| 3     | -1    | 2     | 1     | 1   | 7   | 5.439434892052E+01            |
| 3     | 1     | 2     | -1    | 1   | 7   | 5.439434892052E+01            |
| 3     | 1     | 2     | 1     | 1   | 7   | -5.439434892052E+01           |

continued on next page

| $L_A$ | $K_A$ | $L_B$ | $K_B$ | $L$ | $N$ | $C_{L_A, K_A, L_B, K_B, L}^N$ |
|-------|-------|-------|-------|-----|-----|-------------------------------|
| 3     | -1    | 2     | -1    | 3   | 7   | -1.269201474812E+02           |
| 3     | -1    | 2     | 1     | 3   | 7   | 1.269201474812E+02            |
| 3     | 1     | 2     | -1    | 3   | 7   | 1.269201474812E+02            |
| 3     | 1     | 2     | 1     | 3   | 7   | -1.269201474812E+02           |
| 3     | -1    | 2     | -1    | 5   | 7   | -2.126100928518E+03           |
| 3     | -1    | 2     | 1     | 5   | 7   | 2.126100928518E+03            |
| 3     | 1     | 2     | -1    | 5   | 7   | 2.126100928518E+03            |
| 3     | 1     | 2     | 1     | 5   | 7   | -2.126100928518E+03           |
| 3     | -1    | 2     | -2    | 1   | 7   | -3.710398781225E+01           |
| 3     | -1    | 2     | 2     | 1   | 7   | -3.710398781225E+01           |
| 3     | 1     | 2     | -2    | 1   | 7   | 3.710398781225E+01            |
| 3     | 1     | 2     | 2     | 1   | 7   | 3.710398781225E+01            |
| 3     | -1    | 2     | -2    | 3   | 7   | -8.657597156192E+01           |
| 3     | -1    | 2     | 2     | 3   | 7   | -8.657597156192E+01           |
| 3     | 1     | 2     | -2    | 3   | 7   | 8.657597156192E+01            |
| 3     | 1     | 2     | 2     | 3   | 7   | 8.657597156192E+01            |
| 3     | -1    | 2     | -2    | 5   | 7   | -1.450276076557E+03           |
| 3     | -1    | 2     | 2     | 5   | 7   | -1.450276076557E+03           |
| 3     | 1     | 2     | -2    | 5   | 7   | 1.450276076557E+03            |
| 3     | 1     | 2     | 2     | 5   | 7   | 1.450276076557E+03            |
| 3     | -2    | 0     | 0     | 3   | 7   | 1.793485608365E+03            |
| 3     | 2     | 0     | 0     | 3   | 7   | 1.793485608365E+03            |
| 3     | -2    | 2     | 0     | 1   | 7   | -1.697724106617E+01           |
| 3     | 2     | 2     | 0     | 1   | 7   | -1.697724106617E+01           |
| 3     | -2    | 2     | 0     | 3   | 7   | -3.961356248774E+01           |
| 3     | 2     | 2     | 0     | 3   | 7   | -3.961356248774E+01           |
| 3     | -2    | 2     | 0     | 5   | 7   | -6.635859921258E+02           |
| 3     | 2     | 2     | 0     | 5   | 7   | -6.635859921258E+02           |
| 3     | -2    | 2     | -1    | 1   | 7   | 8.507378946648E+00            |
| 3     | -2    | 2     | 1     | 1   | 7   | -8.507378946648E+00           |
| 3     | 2     | 2     | -1    | 1   | 7   | 8.507378946648E+00            |
| 3     | 2     | 2     | 1     | 1   | 7   | -8.507378946648E+00           |
| 3     | -2    | 2     | -1    | 3   | 7   | 1.985055087551E+01            |
| 3     | -2    | 2     | 1     | 3   | 7   | -1.985055087551E+01           |
| 3     | 2     | 2     | -1    | 3   | 7   | 1.985055087551E+01            |
| 3     | 2     | 2     | 1     | 3   | 7   | -1.985055087551E+01           |
| 3     | -2    | 2     | -1    | 5   | 7   | 3.325262023846E+02            |
| 3     | -2    | 2     | 1     | 5   | 7   | -3.325262023846E+02           |
| 3     | 2     | 2     | -1    | 5   | 7   | 3.325262023846E+02            |
| 3     | 2     | 2     | 1     | 5   | 7   | -3.325262023846E+02           |
| 3     | -2    | 2     | -2    | 1   | 7   | 5.935893554937E+00            |
| 3     | -2    | 2     | 2     | 1   | 7   | 5.935893554937E+00            |
| 3     | 2     | 2     | -2    | 1   | 7   | 5.935893554937E+00            |
| 3     | 2     | 2     | 2     | 1   | 7   | 5.935893554937E+00            |
| 3     | -2    | 2     | -2    | 3   | 7   | 1.385041829485E+01            |
| 3     | -2    | 2     | 2     | 3   | 7   | 1.385041829485E+01            |
| 3     | 2     | 2     | -2    | 3   | 7   | 1.385041829485E+01            |
| 3     | 2     | 2     | 2     | 3   | 7   | 1.385041829485E+01            |
| 3     | -2    | 2     | -2    | 5   | 7   | 2.320150723226E+02            |
| 3     | -2    | 2     | 2     | 5   | 7   | 2.320150723226E+02            |
| 3     | 2     | 2     | -2    | 5   | 7   | 2.320150723226E+02            |
| 3     | 2     | 2     | 2     | 5   | 7   | 2.320150723226E+02            |
| 3     | -3    | 0     | 0     | 3   | 7   | -7.612885882146E+03           |
| 3     | 3     | 0     | 0     | 3   | 7   | 7.612885882146E+03            |
| 3     | -3    | 2     | 0     | 1   | 7   | 6.496787253885E+01            |
| 3     | 3     | 2     | 0     | 1   | 7   | -6.496787253885E+01           |
| 3     | -3    | 2     | 0     | 3   | 7   | 1.515917025907E+02            |
| 3     | 3     | 2     | 0     | 3   | 7   | -1.515917025907E+02           |
| 3     | -3    | 2     | 0     | 5   | 7   | 2.539386110320E+03            |
| 3     | 3     | 2     | 0     | 5   | 7   | -2.539386110320E+03           |
| 3     | -3    | 2     | -1    | 1   | 7   | -3.198082299599E+01           |
| 3     | -3    | 2     | 1     | 1   | 7   | 3.198082299599E+01            |
| 3     | 3     | 2     | -1    | 1   | 7   | 3.198082299599E+01            |
| 3     | 3     | 2     | 1     | 1   | 7   | -3.198082299599E+01           |
| 3     | -3    | 2     | -1    | 3   | 7   | -7.462192032398E+01           |
| 3     | -3    | 2     | 1     | 3   | 7   | 7.462192032398E+01            |

continued on next page

| $L_A$ | $K_A$ | $L_B$ | $K_B$ | $L$ | $N$ | $C_{L_A, K_A, L_B, K_B, L}^N$ |
|-------|-------|-------|-------|-----|-----|-------------------------------|
| 3     | 3     | 2     | -1    | 3   | 7   | 7.462192032398E+01            |
| 3     | 3     | 2     | 1     | 3   | 7   | -7.462192032398E+01           |
| 3     | -3    | 2     | -1    | 5   | 7   | -1.250027968271E+03           |
| 3     | -3    | 2     | 1     | 5   | 7   | 1.250027968271E+03            |
| 3     | 3     | 2     | -1    | 5   | 7   | 1.250027968271E+03            |
| 3     | 3     | 2     | 1     | 5   | 7   | -1.250027968271E+03           |
| 3     | -3    | 2     | -2    | 1   | 7   | -2.140935773471E+01           |
| 3     | -3    | 2     | 2     | 1   | 7   | -2.140935773471E+01           |
| 3     | 3     | 2     | -2    | 1   | 7   | 2.140935773471E+01            |
| 3     | 3     | 2     | 2     | 1   | 7   | 2.140935773471E+01            |
| 3     | -3    | 2     | -2    | 3   | 7   | -4.995516804766E+01           |
| 3     | -3    | 2     | 2     | 3   | 7   | -4.995516804766E+01           |
| 3     | 3     | 2     | -2    | 3   | 7   | 4.995516804766E+01            |
| 3     | 3     | 2     | 2     | 3   | 7   | 4.995516804766E+01            |
| 3     | -3    | 2     | -2    | 5   | 7   | -8.368232410548E+02           |
| 3     | -3    | 2     | 2     | 5   | 7   | -8.368232410548E+02           |
| 3     | 3     | 2     | -2    | 5   | 7   | 8.368232410548E+02            |
| 3     | 3     | 2     | 2     | 5   | 7   | 8.368232410548E+02            |
| 0     | 0     | 0     | 0     | 0   | 8   | 1.170637402399E+06            |
| 0     | 0     | 2     | 0     | 2   | 8   | -9.616738897118E+05           |
| 0     | 0     | 2     | -1    | 2   | 8   | 5.640291506733E+05            |
| 0     | 0     | 2     | 1     | 2   | 8   | -5.640291506733E+05           |
| 0     | 0     | 2     | -2    | 2   | 8   | 2.504467117041E+05            |
| 0     | 0     | 2     | 2     | 2   | 8   | 2.504467117041E+05            |
| 0     | 0     | 4     | 0     | 4   | 8   | -5.368927075565E+02           |
| 0     | 0     | 4     | -1    | 4   | 8   | -9.451931859295E+04           |
| 0     | 0     | 4     | 1     | 4   | 8   | 9.451931859295E+04            |
| 0     | 0     | 4     | -2    | 4   | 8   | -7.170625009708E+04           |
| 0     | 0     | 4     | 2     | 4   | 8   | -7.170625009708E+04           |
| 0     | 0     | 4     | -3    | 4   | 8   | -1.066961967907E+04           |
| 0     | 0     | 4     | 3     | 4   | 8   | 1.066961967907E+04            |
| 0     | 0     | 4     | -4    | 4   | 8   | 1.225067405972E+04            |
| 0     | 0     | 4     | 4     | 4   | 8   | 1.225067405972E+04            |
| 1     | 0     | 1     | 0     | 0   | 8   | 5.772323134544E+03            |
| 1     | 0     | 1     | 0     | 2   | 8   | -2.920590159303E+04           |
| 1     | 0     | 1     | -1    | 0   | 8   | -2.729078481353E+02           |
| 1     | 0     | 1     | 1     | 0   | 8   | 2.729078481353E+02            |
| 1     | 0     | 1     | -1    | 2   | 8   | 1.380816626309E+03            |
| 1     | 0     | 1     | 1     | 2   | 8   | -1.380816626309E+03           |
| 1     | 0     | 3     | 0     | 2   | 8   | 4.281360270902E+03            |
| 1     | 0     | 3     | 0     | 4   | 8   | -2.210884937109E+04           |
| 1     | 0     | 3     | -1    | 2   | 8   | -5.002766213434E+03           |
| 1     | 0     | 3     | 1     | 2   | 8   | 5.002766213434E+03            |
| 1     | 0     | 3     | -1    | 4   | 8   | 2.583417363946E+04            |
| 1     | 0     | 3     | 1     | 4   | 8   | -2.583417363946E+04           |
| 1     | 0     | 3     | -2    | 2   | 8   | 7.203835198878E+02            |
| 1     | 0     | 3     | 2     | 2   | 8   | 7.203835198878E+02            |
| 1     | 0     | 3     | -2    | 4   | 8   | -3.720044500544E+03           |
| 1     | 0     | 3     | 2     | 4   | 8   | -3.720044500544E+03           |
| 1     | 0     | 3     | -3    | 2   | 8   | -3.123517342995E+03           |
| 1     | 0     | 3     | 3     | 2   | 8   | 3.123517342995E+03            |
| 1     | 0     | 3     | -3    | 4   | 8   | 1.612977420135E+04            |
| 1     | 0     | 3     | 3     | 4   | 8   | -1.612977420135E+04           |
| 1     | -1    | 1     | 0     | 0   | 8   | -2.729078481353E+02           |
| 1     | 1     | 1     | 0     | 0   | 8   | 2.729078481353E+02            |
| 1     | -1    | 1     | 0     | 2   | 8   | 1.380816626309E+03            |
| 1     | 1     | 1     | 0     | 2   | 8   | -1.380816626309E+03           |
| 1     | -1    | 1     | -1    | 0   | 8   | 6.787518512496E+01            |
| 1     | -1    | 1     | 1     | 0   | 8   | -6.787518512496E+01           |
| 1     | 1     | 1     | -1    | 0   | 8   | -6.787518512496E+01           |
| 1     | 1     | 1     | 1     | 0   | 8   | 6.787518512496E+01            |
| 1     | -1    | 1     | -1    | 2   | 8   | -3.434242905607E+02           |
| 1     | -1    | 1     | 1     | 2   | 8   | 3.434242905607E+02            |
| 1     | 1     | 1     | -1    | 2   | 8   | 3.434242905607E+02            |
| 1     | 1     | 1     | 1     | 2   | 8   | -3.434242905607E+02           |
| 1     | -1    | 3     | 0     | 2   | 8   | -6.858786914736E+01           |

continued on next page

| $L_A$ | $K_A$ | $L_B$ | $K_B$ | $L$ | $N$ | $C_{L_A, K_A, L_B, K_B, L}^N$ |
|-------|-------|-------|-------|-----|-----|-------------------------------|
| 1     | 1     | 3     | 0     | 2   | 8   | 6.858786914736E+01            |
| 1     | -1    | 3     | 0     | 4   | 8   | 3.541862332794E+02            |
| 1     | 1     | 3     | 0     | 4   | 8   | -3.541862332794E+02           |
| 1     | -1    | 3     | -1    | 2   | 8   | 7.078539277236E+01            |
| 1     | -1    | 3     | 1     | 2   | 8   | -7.078539277236E+01           |
| 1     | 1     | 3     | -1    | 2   | 8   | -7.078539277236E+01           |
| 1     | 1     | 3     | 1     | 2   | 8   | 7.078539277236E+01            |
| 1     | -1    | 3     | -1    | 4   | 8   | -3.655341964828E+02           |
| 1     | -1    | 3     | 1     | 4   | 8   | 3.655341964828E+02            |
| 1     | 1     | 3     | -1    | 4   | 8   | 3.655341964828E+02            |
| 1     | 1     | 3     | 1     | 4   | 8   | -3.655341964828E+02           |
| 1     | -1    | 3     | -2    | 2   | 8   | 1.247234627981E+01            |
| 1     | -1    | 3     | 2     | 2   | 8   | 1.247234627981E+01            |
| 1     | 1     | 3     | -2    | 2   | 8   | -1.247234627981E+01           |
| 1     | 1     | 3     | 2     | 2   | 8   | -1.247234627981E+01           |
| 1     | -1    | 3     | -2    | 4   | 8   | -6.440691923979E+01           |
| 1     | -1    | 3     | 2     | 4   | 8   | -6.440691923979E+01           |
| 1     | 1     | 3     | -2    | 4   | 8   | 6.440691923979E+01            |
| 1     | 1     | 3     | 2     | 4   | 8   | 6.440691923979E+01            |
| 1     | -1    | 3     | -3    | 2   | 8   | 1.118586811746E+02            |
| 1     | -1    | 3     | 3     | 2   | 8   | -1.118586811746E+02           |
| 1     | 1     | 3     | -3    | 2   | 8   | -1.118586811746E+02           |
| 1     | 1     | 3     | 3     | 2   | 8   | 1.118586811746E+02            |
| 1     | -1    | 3     | -3    | 4   | 8   | -5.776357457574E+02           |
| 1     | -1    | 3     | 3     | 4   | 8   | 5.776357457574E+02            |
| 1     | 1     | 3     | -3    | 4   | 8   | 5.776357457574E+02            |
| 1     | 1     | 3     | 3     | 4   | 8   | -5.776357457574E+02           |
| 2     | 0     | 0     | 0     | 2   | 8   | -9.616738897118E+05           |
| 2     | 0     | 2     | 0     | 0   | 8   | 6.766176823378E+03            |
| 2     | 0     | 2     | 0     | 2   | 8   | -1.894215311291E+04           |
| 2     | 0     | 2     | 0     | 4   | 8   | 1.486222447479E+05            |
| 2     | 0     | 2     | -1    | 0   | 8   | -3.462106478277E+03           |
| 2     | 0     | 2     | 1     | 0   | 8   | 3.462106478277E+03            |
| 2     | 0     | 2     | -1    | 2   | 8   | 1.112524309873E+04            |
| 2     | 0     | 2     | 1     | 2   | 8   | -1.112524309873E+04           |
| 2     | 0     | 2     | -1    | 4   | 8   | -7.962917285980E+04           |
| 2     | 0     | 2     | 1     | 4   | 8   | 7.962917285980E+04            |
| 2     | 0     | 2     | -2    | 0   | 8   | -1.811743453402E+03           |
| 2     | 0     | 2     | 2     | 0   | 8   | -1.811743453402E+03           |
| 2     | 0     | 2     | -2    | 2   | 8   | 6.305413657989E+03            |
| 2     | 0     | 2     | 2     | 2   | 8   | 6.305413657989E+03            |
| 2     | 0     | 2     | -2    | 4   | 8   | -4.287922724641E+04           |
| 2     | 0     | 2     | 2     | 4   | 8   | -4.287922724641E+04           |
| 2     | 0     | 3     | -1    | 2   | 8   | -5.824342097567E+02           |
| 2     | 0     | 3     | 1     | 2   | 8   | -5.824342097567E+02           |
| 2     | 0     | 3     | -1    | 4   | 8   | -1.647372717256E+03           |
| 2     | 0     | 3     | 1     | 4   | 8   | -1.647372717256E+03           |
| 2     | 0     | 3     | -2    | 2   | 8   | -6.661160256705E+02           |
| 2     | 0     | 3     | 2     | 2   | 8   | 6.661160256705E+02            |
| 2     | 0     | 3     | -2    | 4   | 8   | -1.884060635235E+03           |
| 2     | 0     | 3     | 2     | 4   | 8   | 1.884060635235E+03            |
| 2     | 0     | 3     | -3    | 2   | 8   | -9.090145002383E+02           |
| 2     | 0     | 3     | 3     | 2   | 8   | -9.090145002383E+02           |
| 2     | 0     | 3     | -3    | 4   | 8   | -2.571081269262E+03           |
| 2     | 0     | 3     | 3     | 4   | 8   | -2.571081269262E+03           |
| 2     | 0     | 4     | 0     | 2   | 8   | 1.455572676892E+01            |
| 2     | 0     | 4     | 0     | 4   | 8   | 7.276694425542E+01            |
| 2     | 0     | 4     | 0     | 6   | 8   | 6.329022326908E+02            |
| 2     | 0     | 4     | -1    | 2   | 8   | 6.766202508728E+02            |
| 2     | 0     | 4     | 1     | 2   | 8   | -6.766202508728E+02           |
| 2     | 0     | 4     | -1    | 4   | 8   | 1.565678419174E+03            |
| 2     | 0     | 4     | 1     | 4   | 8   | -1.565678419174E+03           |
| 2     | 0     | 4     | -1    | 6   | 8   | 3.684831051961E+04            |
| 2     | 0     | 4     | 1     | 6   | 8   | -3.684831051961E+04           |
| 2     | 0     | 4     | -2    | 2   | 8   | 5.183809568636E+02            |
| 2     | 0     | 4     | 2     | 2   | 8   | 5.183809568636E+02            |

continued on next page

| $L_A$ | $K_A$ | $L_B$ | $K_B$ | $L$ | $N$ | $C_{L_A, K_A, L_B, K_B, L}^N$ |
|-------|-------|-------|-------|-----|-----|-------------------------------|
| 2     | 0     | 4     | -2    | 4   | 8   | 1.202300768749E+03            |
| 2     | 0     | 4     | 2     | 4   | 8   | 1.202300768749E+03            |
| 2     | 0     | 4     | -2    | 6   | 8   | 2.821932014907E+04            |
| 2     | 0     | 4     | 2     | 6   | 8   | 2.821932014907E+04            |
| 2     | 0     | 4     | -3    | 2   | 8   | 9.021570409352E+01            |
| 2     | 0     | 4     | 3     | 2   | 8   | -9.021570409352E+01           |
| 2     | 0     | 4     | -3    | 4   | 8   | 2.566553453484E+02            |
| 2     | 0     | 4     | 3     | 4   | 8   | -2.566553453484E+02           |
| 2     | 0     | 4     | -3    | 6   | 8   | 4.717264192400E+03            |
| 2     | 0     | 4     | 3     | 6   | 8   | -4.717264192400E+03           |
| 2     | 0     | 4     | -4    | 2   | 8   | -9.237746429058E+01           |
| 2     | 0     | 4     | 4     | 2   | 8   | -9.237746429058E+01           |
| 2     | 0     | 4     | -4    | 4   | 8   | -2.084957872098E+02           |
| 2     | 0     | 4     | 4     | 4   | 8   | -2.084957872098E+02           |
| 2     | 0     | 4     | -4    | 6   | 8   | -5.052334267652E+03           |
| 2     | 0     | 4     | 4     | 6   | 8   | -5.052334267652E+03           |
| 2     | -1    | 0     | 0     | 2   | 8   | 5.640291506733E+05            |
| 2     | 1     | 0     | 0     | 2   | 8   | -5.640291506733E+05           |
| 2     | -1    | 2     | 0     | 0   | 8   | -3.462106478277E+03           |
| 2     | 1     | 2     | 0     | 0   | 8   | 3.462106478277E+03            |
| 2     | -1    | 2     | 0     | 2   | 8   | 1.112524309873E+04            |
| 2     | 1     | 2     | 0     | 2   | 8   | -1.112524309873E+04           |
| 2     | -1    | 2     | 0     | 4   | 8   | -7.962917285980E+04           |
| 2     | 1     | 2     | 0     | 4   | 8   | 7.962917285980E+04            |
| 2     | -1    | 2     | 1     | 0   | 8   | -1.709074142129E+03           |
| 2     | 1     | 2     | -1    | 0   | 8   | -1.709074142129E+03           |
| 2     | -1    | 2     | -1    | 0   | 8   | 1.826185536033E+03            |
| 2     | 1     | 2     | 1     | 0   | 8   | 1.826185536033E+03            |
| 2     | -1    | 2     | -1    | 2   | 8   | -6.114145379101E+03           |
| 2     | 1     | 2     | 1     | 2   | 8   | -6.114145379101E+03           |
| 2     | -1    | 2     | 1     | 2   | 8   | 6.614934764332E+03            |
| 2     | 1     | 2     | -1    | 2   | 8   | 6.614934764332E+03            |
| 2     | -1    | 2     | 1     | 4   | 8   | -4.211641646459E+04           |
| 2     | 1     | 2     | -1    | 4   | 8   | -4.211641646459E+04           |
| 2     | -1    | 2     | -1    | 4   | 8   | 4.261720584982E+04            |
| 2     | 1     | 2     | 1     | 4   | 8   | 4.261720584982E+04            |
| 2     | -1    | 2     | -2    | 0   | 8   | 9.075201659416E+02            |
| 2     | 1     | 2     | 2     | 0   | 8   | -9.075201659416E+02           |
| 2     | -1    | 2     | 2     | 0   | 8   | 9.621751986968E+02            |
| 2     | 1     | 2     | -2    | 0   | 8   | -9.621751986968E+02           |
| 2     | -1    | 2     | 2     | 2   | 8   | -3.592261161468E+03           |
| 2     | 1     | 2     | -2    | 2   | 8   | 3.592261161468E+03            |
| 2     | -1    | 2     | -2    | 2   | 8   | -3.825975912362E+03           |
| 2     | 1     | 2     | 2     | 2   | 8   | 3.825975912362E+03            |
| 2     | -1    | 2     | -2    | 4   | 8   | 2.314745791107E+04            |
| 2     | 1     | 2     | 2     | 4   | 8   | -2.314745791107E+04           |
| 2     | -1    | 2     | 2     | 4   | 8   | 2.338117266197E+04            |
| 2     | 1     | 2     | -2    | 4   | 8   | -2.338117266197E+04           |
| 2     | -1    | 3     | 0     | 2   | 8   | 6.067467086333E+02            |
| 2     | 1     | 3     | 0     | 2   | 8   | 6.067467086333E+02            |
| 2     | -1    | 3     | 0     | 4   | 8   | 1.716138848549E+03            |
| 2     | 1     | 3     | 0     | 4   | 8   | 1.716138848549E+03            |
| 2     | -1    | 3     | 1     | 2   | 8   | 1.001155465402E+03            |
| 2     | 1     | 3     | -1    | 2   | 8   | -1.001155465402E+03           |
| 2     | -1    | 3     | -1    | 2   | 8   | -4.247909370244E+02           |
| 2     | 1     | 3     | 1     | 2   | 8   | 4.247909370244E+02            |
| 2     | -1    | 3     | -1    | 4   | 8   | -1.201490208626E+03           |
| 2     | 1     | 3     | 1     | 4   | 8   | 1.201490208626E+03            |
| 2     | -1    | 3     | 1     | 4   | 8   | 2.831695274430E+03            |
| 2     | 1     | 3     | -1    | 4   | 8   | -2.831695274430E+03           |
| 2     | -1    | 3     | 2     | 2   | 8   | -2.171932266245E+02           |
| 2     | 1     | 3     | -2    | 2   | 8   | -2.171932266245E+02           |
| 2     | -1    | 3     | -2    | 2   | 8   | 4.422443253823E+02            |
| 2     | 1     | 3     | 2     | 2   | 8   | 4.422443253823E+02            |
| 2     | -1    | 3     | -2    | 4   | 8   | 1.250855845676E+03            |
| 2     | 1     | 3     | 2     | 4   | 8   | 1.250855845676E+03            |

continued on next page

| $L_A$ | $K_A$ | $L_B$ | $K_B$ | $L$ | $N$ | $C_{L_A, K_A, L_B, K_B, L}^N$ |
|-------|-------|-------|-------|-----|-----|-------------------------------|
| 2     | -1    | 3     | 2     | 4   | 8   | -6.143152134959E+02           |
| 2     | 1     | 3     | -2    | 4   | 8   | -6.143152134959E+02           |
| 2     | -1    | 3     | -3    | 2   | 8   | 3.463507298357E+01            |
| 2     | 1     | 3     | 3     | 2   | 8   | -3.463507298357E+01           |
| 2     | -1    | 3     | 3     | 2   | 8   | 8.667006106875E+02            |
| 2     | 1     | 3     | -3    | 2   | 8   | -8.667006106875E+02           |
| 2     | -1    | 3     | 3     | 4   | 8   | 2.451399516303E+03            |
| 2     | 1     | 3     | -3    | 4   | 8   | -2.451399516303E+03           |
| 2     | -1    | 3     | -3    | 4   | 8   | 9.796277989429E+01            |
| 2     | 1     | 3     | 3     | 4   | 8   | -9.796277989429E+01           |
| 2     | -1    | 4     | 0     | 2   | 8   | -7.541254489782E+00           |
| 2     | 1     | 4     | 0     | 2   | 8   | 7.541254489782E+00            |
| 2     | -1    | 4     | 0     | 4   | 8   | -3.679074684477E+01           |
| 2     | 1     | 4     | 0     | 4   | 8   | 3.679074684477E+01            |
| 2     | -1    | 4     | 0     | 6   | 8   | -3.316219027751E+02           |
| 2     | 1     | 4     | 0     | 6   | 8   | 3.316219027751E+02            |
| 2     | -1    | 4     | -1    | 2   | 8   | -3.357842119518E+02           |
| 2     | -1    | 4     | 1     | 2   | 8   | 3.357842119518E+02            |
| 2     | 1     | 4     | -1    | 2   | 8   | 3.357842119518E+02            |
| 2     | 1     | 4     | 1     | 2   | 8   | -3.357842119518E+02           |
| 2     | -1    | 4     | -1    | 4   | 8   | -7.768923746327E+02           |
| 2     | -1    | 4     | 1     | 4   | 8   | 7.768923746327E+02            |
| 2     | 1     | 4     | -1    | 4   | 8   | 7.768923746327E+02            |
| 2     | 1     | 4     | 1     | 4   | 8   | -7.768923746327E+02           |
| 2     | -1    | 4     | -1    | 6   | 8   | -1.828701240951E+04           |
| 2     | -1    | 4     | 1     | 6   | 8   | 1.828701240951E+04            |
| 2     | 1     | 4     | -1    | 6   | 8   | 1.828701240951E+04            |
| 2     | 1     | 4     | 1     | 6   | 8   | -1.828701240951E+04           |
| 2     | -1    | 4     | -2    | 2   | 8   | -2.577006219697E+02           |
| 2     | -1    | 4     | 2     | 2   | 8   | -2.577006219697E+02           |
| 2     | 1     | 4     | -2    | 2   | 8   | 2.577006219697E+02            |
| 2     | 1     | 4     | 2     | 2   | 8   | 2.577006219697E+02            |
| 2     | -1    | 4     | -2    | 4   | 8   | -5.978551703745E+02           |
| 2     | -1    | 4     | 2     | 4   | 8   | -5.978551703745E+02           |
| 2     | 1     | 4     | -2    | 4   | 8   | 5.978551703745E+02            |
| 2     | 1     | 4     | 2     | 4   | 8   | 5.978551703745E+02            |
| 2     | -1    | 4     | -2    | 6   | 8   | -1.402790091601E+04           |
| 2     | -1    | 4     | 2     | 6   | 8   | -1.402790091601E+04           |
| 2     | 1     | 4     | -2    | 6   | 8   | 1.402790091601E+04            |
| 2     | 1     | 4     | 2     | 6   | 8   | 1.402790091601E+04            |
| 2     | -1    | 4     | -3    | 2   | 8   | -4.512381375247E+01           |
| 2     | -1    | 4     | 3     | 2   | 8   | 4.512381375247E+01            |
| 2     | 1     | 4     | -3    | 2   | 8   | 4.512381375247E+01            |
| 2     | 1     | 4     | 3     | 2   | 8   | -4.512381375247E+01           |
| 2     | -1    | 4     | -3    | 4   | 8   | -1.282293905106E+02           |
| 2     | -1    | 4     | 3     | 4   | 8   | 1.282293905106E+02            |
| 2     | 1     | 4     | -3    | 4   | 8   | 1.282293905106E+02            |
| 2     | 1     | 4     | 3     | 4   | 8   | -1.282293905106E+02           |
| 2     | -1    | 4     | -3    | 6   | 8   | -2.360054169959E+03           |
| 2     | -1    | 4     | 3     | 6   | 8   | 2.360054169959E+03            |
| 2     | 1     | 4     | -3    | 6   | 8   | 2.360054169959E+03            |
| 2     | 1     | 4     | 3     | 6   | 8   | -2.360054169959E+03           |
| 2     | -1    | 4     | -4    | 2   | 8   | 4.634952399582E+01            |
| 2     | -1    | 4     | 4     | 2   | 8   | 4.634952399582E+01            |
| 2     | 1     | 4     | -4    | 2   | 8   | -4.634952399582E+01           |
| 2     | 1     | 4     | 4     | 2   | 8   | -4.634952399582E+01           |
| 2     | -1    | 4     | -4    | 4   | 8   | 1.047038098325E+02            |
| 2     | -1    | 4     | 4     | 4   | 8   | 1.047038098325E+02            |
| 2     | 1     | 4     | -4    | 4   | 8   | -1.047038098325E+02           |
| 2     | 1     | 4     | 4     | 4   | 8   | -1.047038098325E+02           |
| 2     | -1    | 4     | -4    | 6   | 8   | 2.534580956098E+03            |
| 2     | -1    | 4     | 4     | 6   | 8   | 2.534580956098E+03            |
| 2     | 1     | 4     | -4    | 6   | 8   | -2.534580956098E+03           |
| 2     | 1     | 4     | 4     | 6   | 8   | -2.534580956098E+03           |
| 2     | -2    | 0     | 0     | 2   | 8   | 2.504467117041E+05            |
| 2     | 2     | 0     | 0     | 2   | 8   | 2.504467117041E+05            |

continued on next page

| $L_A$ | $K_A$ | $L_B$ | $K_B$ | $L$ | $N$ | $C_{L_A, K_A, L_B, K_B, L}^N$ |
|-------|-------|-------|-------|-----|-----|-------------------------------|
| 2     | -2    | 2     | 0     | 0   | 8   | -1.811743453402E+03           |
| 2     | 2     | 2     | 0     | 0   | 8   | -1.811743453402E+03           |
| 2     | -2    | 2     | 0     | 2   | 8   | 6.305413657989E+03            |
| 2     | 2     | 2     | 0     | 2   | 8   | 6.305413657989E+03            |
| 2     | -2    | 2     | 0     | 4   | 8   | -4.287922724641E+04           |
| 2     | 2     | 2     | 0     | 4   | 8   | -4.287922724641E+04           |
| 2     | -2    | 2     | -1    | 0   | 8   | 9.075201659416E+02            |
| 2     | 2     | 2     | 1     | 0   | 8   | -9.075201659416E+02           |
| 2     | -2    | 2     | 1     | 0   | 8   | -9.621751986968E+02           |
| 2     | 2     | 2     | -1    | 0   | 8   | 9.621751986968E+02            |
| 2     | -2    | 2     | 1     | 2   | 8   | 3.592261161468E+03            |
| 2     | 2     | 2     | -1    | 2   | 8   | -3.592261161468E+03           |
| 2     | -2    | 2     | -1    | 2   | 8   | -3.825975912362E+03           |
| 2     | 2     | 2     | 1     | 2   | 8   | 3.825975912362E+03            |
| 2     | -2    | 2     | -1    | 4   | 8   | 2.314745791107E+04            |
| 2     | 2     | 2     | 1     | 4   | 8   | -2.314745791107E+04           |
| 2     | -2    | 2     | 1     | 4   | 8   | -2.338117266197E+04           |
| 2     | 2     | 2     | -1    | 4   | 8   | 2.338117266197E+04            |
| 2     | -2    | 2     | 2     | 0   | 8   | 4.486503305121E+02            |
| 2     | 2     | 2     | -2    | 0   | 8   | 4.486503305121E+02            |
| 2     | -2    | 2     | -2    | 0   | 8   | 4.742282789532E+02            |
| 2     | 2     | 2     | 2     | 0   | 8   | 4.742282789532E+02            |
| 2     | -2    | 2     | -2    | 2   | 8   | -2.074210904218E+03           |
| 2     | 2     | 2     | 2     | 2   | 8   | -2.074210904218E+03           |
| 2     | -2    | 2     | 2     | 2   | 8   | -2.183586812473E+03           |
| 2     | 2     | 2     | -2    | 2   | 8   | -2.183586812473E+03           |
| 2     | -2    | 2     | 2     | 4   | 8   | 1.217375032414E+04            |
| 2     | 2     | 2     | -2    | 4   | 8   | 1.217375032414E+04            |
| 2     | -2    | 2     | -2    | 4   | 8   | 1.228312623239E+04            |
| 2     | 2     | 2     | 2     | 4   | 8   | 1.228312623239E+04            |
| 2     | -2    | 3     | 0     | 2   | 8   | -2.831897954743E+02           |
| 2     | 2     | 3     | 0     | 2   | 8   | 2.831897954743E+02            |
| 2     | -2    | 3     | 0     | 4   | 8   | -8.009816989708E+02           |
| 2     | 2     | 3     | 0     | 4   | 8   | 8.009816989708E+02            |
| 2     | -2    | 3     | 1     | 2   | 8   | -1.370843796236E+02           |
| 2     | 2     | 3     | -1    | 2   | 8   | -1.370843796236E+02           |
| 2     | -2    | 3     | -1    | 2   | 8   | 5.279466751232E+02            |
| 2     | 2     | 3     | 1     | 2   | 8   | 5.279466751232E+02            |
| 2     | -2    | 3     | -1    | 4   | 8   | 1.493258696338E+03            |
| 2     | 2     | 3     | 1     | 4   | 8   | 1.493258696338E+03            |
| 2     | -2    | 3     | 1     | 4   | 8   | -3.877331777065E+02           |
| 2     | 2     | 3     | -1    | 4   | 8   | -3.877331777065E+02           |
| 2     | -2    | 3     | -2    | 2   | 8   | 1.719889038313E+02            |
| 2     | 2     | 3     | 2     | 2   | 8   | -1.719889038313E+02           |
| 2     | -2    | 3     | 2     | 2   | 8   | -2.756592906077E+02           |
| 2     | 2     | 3     | -2    | 2   | 8   | 2.756592906077E+02            |
| 2     | -2    | 3     | -2    | 4   | 8   | 4.864580807517E+02            |
| 2     | 2     | 3     | 2     | 4   | 8   | -4.864580807517E+02           |
| 2     | -2    | 3     | 2     | 4   | 8   | -7.796822147430E+02           |
| 2     | 2     | 3     | -2    | 4   | 8   | 7.796822147430E+02            |
| 2     | -2    | 3     | 3     | 2   | 8   | 1.110125684866E+02            |
| 2     | 2     | 3     | -3    | 2   | 8   | 1.110125684866E+02            |
| 2     | -2    | 3     | -3    | 2   | 8   | 5.029561585337E+02            |
| 2     | 2     | 3     | 3     | 2   | 8   | 5.029561585337E+02            |
| 2     | -2    | 3     | -3    | 4   | 8   | 1.422574841355E+03            |
| 2     | 2     | 3     | 3     | 4   | 8   | 1.422574841355E+03            |
| 2     | -2    | 3     | 3     | 4   | 8   | 3.139909598951E+02            |
| 2     | 2     | 3     | -3    | 4   | 8   | 3.139909598951E+02            |
| 2     | -2    | 4     | 0     | 2   | 8   | -5.669687411849E+00           |
| 2     | 2     | 4     | 0     | 2   | 8   | -5.669687411849E+00           |
| 2     | -2    | 4     | 0     | 4   | 8   | -2.620057570371E+01           |
| 2     | 2     | 4     | 0     | 4   | 8   | -2.620057570371E+01           |
| 2     | -2    | 4     | 0     | 6   | 8   | -2.552880098242E+02           |
| 2     | 2     | 4     | 0     | 6   | 8   | -2.552880098242E+02           |
| 2     | -2    | 4     | -1    | 2   | 8   | -2.292573751343E+02           |
| 2     | -2    | 4     | 1     | 2   | 8   | 2.292573751343E+02            |

continued on next page

| $L_A$ | $K_A$ | $L_B$ | $K_B$ | $L$ | $N$ | $C_{L_A, K_A, L_B, K_B, L}^N$ |
|-------|-------|-------|-------|-----|-----|-------------------------------|
| 2     | 2     | 4     | -1    | 2   | 8   | -2.292573751343E+02           |
| 2     | 2     | 4     | 1     | 2   | 8   | 2.292573751343E+02            |
| 2     | -2    | 4     | -1    | 4   | 8   | -5.302225831556E+02           |
| 2     | -2    | 4     | 1     | 4   | 8   | 5.302225831556E+02            |
| 2     | 2     | 4     | -1    | 4   | 8   | -5.302225831556E+02           |
| 2     | 2     | 4     | 1     | 4   | 8   | 5.302225831556E+02            |
| 2     | -2    | 4     | -1    | 6   | 8   | -1.248632321432E+04           |
| 2     | -2    | 4     | 1     | 6   | 8   | 1.248632321432E+04            |
| 2     | 2     | 4     | -1    | 6   | 8   | -1.248632321432E+04           |
| 2     | 2     | 4     | 1     | 6   | 8   | 1.248632321432E+04            |
| 2     | -2    | 4     | -2    | 2   | 8   | -1.765825633296E+02           |
| 2     | -2    | 4     | 2     | 2   | 8   | 1.765825633296E+02            |
| 2     | 2     | 4     | -2    | 2   | 8   | -1.765825633296E+02           |
| 2     | 2     | 4     | 2     | 2   | 8   | 1.765825633296E+02            |
| 2     | -2    | 4     | -2    | 4   | 8   | -4.099919541302E+02           |
| 2     | -2    | 4     | 2     | 4   | 8   | 4.099919541302E+02            |
| 2     | 2     | 4     | -2    | 4   | 8   | -4.099919541302E+02           |
| 2     | 2     | 4     | 2     | 4   | 8   | 4.099919541302E+02            |
| 2     | -2    | 4     | -2    | 6   | 8   | -9.610910903587E+03           |
| 2     | -2    | 4     | 2     | 6   | 8   | 9.610910903587E+03            |
| 2     | 2     | 4     | -2    | 6   | 8   | -9.610910903587E+03           |
| 2     | 2     | 4     | 2     | 6   | 8   | 9.610910903587E+03            |
| 2     | -2    | 4     | -3    | 2   | 8   | -3.113639837238E+01           |
| 2     | -2    | 4     | 3     | 2   | 8   | 3.113639837238E+01            |
| 2     | 2     | 4     | -3    | 2   | 8   | -3.113639837238E+01           |
| 2     | 2     | 4     | 3     | 2   | 8   | 3.113639837238E+01            |
| 2     | -2    | 4     | -3    | 4   | 8   | -8.832498744783E+01           |
| 2     | -2    | 4     | 3     | 4   | 8   | 8.832498744783E+01            |
| 2     | 2     | 4     | -3    | 4   | 8   | -8.832498744783E+01           |
| 2     | 2     | 4     | 3     | 4   | 8   | 8.832498744783E+01            |
| 2     | -2    | 4     | -3    | 6   | 8   | -1.629125885418E+03           |
| 2     | -2    | 4     | 3     | 6   | 8   | 1.629125885418E+03            |
| 2     | 2     | 4     | -3    | 6   | 8   | -1.629125885418E+03           |
| 2     | 2     | 4     | 3     | 6   | 8   | 1.629125885418E+03            |
| 2     | -2    | 4     | -4    | 2   | 8   | 3.236854280613E+01            |
| 2     | -2    | 4     | 4     | 2   | 8   | 3.236854280613E+01            |
| 2     | 2     | 4     | -4    | 2   | 8   | 3.236854280613E+01            |
| 2     | 2     | 4     | 4     | 2   | 8   | 3.236854280613E+01            |
| 2     | -2    | 4     | -4    | 4   | 8   | 7.327228046783E+01            |
| 2     | -2    | 4     | 4     | 4   | 8   | 7.327228046783E+01            |
| 2     | 2     | 4     | -4    | 4   | 8   | 7.327228046783E+01            |
| 2     | 2     | 4     | 4     | 4   | 8   | 7.327228046783E+01            |
| 2     | -2    | 4     | -4    | 6   | 8   | 1.769424200802E+03            |
| 2     | -2    | 4     | 4     | 6   | 8   | 1.769424200802E+03            |
| 2     | 2     | 4     | -4    | 6   | 8   | 1.769424200802E+03            |
| 2     | 2     | 4     | 4     | 6   | 8   | 1.769424200802E+03            |
| 3     | 0     | 1     | 0     | 2   | 8   | 4.281360270902E+03            |
| 3     | 0     | 1     | 0     | 4   | 8   | -2.210884937109E+04           |
| 3     | 0     | 1     | -1    | 2   | 8   | -6.858786914736E+01           |
| 3     | 0     | 1     | 1     | 2   | 8   | 6.858786914736E+01            |
| 3     | 0     | 1     | -1    | 4   | 8   | 3.541862332794E+02            |
| 3     | 0     | 1     | 1     | 4   | 8   | -3.541862332794E+02           |
| 3     | 0     | 2     | -1    | 2   | 8   | -6.067467086333E+02           |
| 3     | 0     | 2     | 1     | 2   | 8   | 6.067467086333E+02            |
| 3     | 0     | 2     | -1    | 4   | 8   | -1.716138848549E+03           |
| 3     | 0     | 2     | 1     | 4   | 8   | 1.716138848549E+03            |
| 3     | 0     | 2     | -2    | 2   | 8   | 2.831897954743E+02            |
| 3     | 0     | 2     | 2     | 2   | 8   | -2.831897954743E+02           |
| 3     | 0     | 2     | -2    | 4   | 8   | 8.009816989708E+02            |
| 3     | 0     | 2     | 2     | 4   | 8   | -8.009816989708E+02           |
| 3     | 0     | 3     | 0     | 0   | 8   | 3.719695904854E+02            |
| 3     | 0     | 3     | 0     | 2   | 8   | -5.762528116983E+02           |
| 3     | 0     | 3     | 0     | 4   | 8   | -2.696342227236E+03           |
| 3     | 0     | 3     | 0     | 6   | 8   | -8.404746975787E+04           |
| 3     | 0     | 3     | -1    | 0   | 8   | -4.370476890079E+02           |
| 3     | 0     | 3     | 1     | 0   | 8   | 4.370476890079E+02            |

continued on next page

| $L_A$ | $K_A$ | $L_B$ | $K_B$ | $L$ | $N$ | $C_{L_A, K_A, L_B, K_B, L}^N$ |
|-------|-------|-------|-------|-----|-----|-------------------------------|
| 3     | 0     | 3     | -1    | 2   | 8   | 6.770713684104E+02            |
| 3     | 0     | 3     | 1     | 2   | 8   | -6.770713684104E+02           |
| 3     | 0     | 3     | -1    | 4   | 8   | 3.168081932853E+03            |
| 3     | 0     | 3     | 1     | 4   | 8   | -3.168081932853E+03           |
| 3     | 0     | 3     | -1    | 6   | 8   | 9.875203071492E+04            |
| 3     | 0     | 3     | 1     | 6   | 8   | -9.875203071492E+04           |
| 3     | 0     | 3     | -2    | 0   | 8   | 6.888009136864E+01            |
| 3     | 0     | 3     | 2     | 0   | 8   | 6.888009136864E+01            |
| 3     | 0     | 3     | -2    | 2   | 8   | -1.067085787024E+02           |
| 3     | 0     | 3     | 2     | 2   | 8   | -1.067085787024E+02           |
| 3     | 0     | 3     | -2    | 4   | 8   | -4.992996839628E+02           |
| 3     | 0     | 3     | 2     | 4   | 8   | -4.992996839628E+02           |
| 3     | 0     | 3     | -2    | 6   | 8   | -1.556363085668E+04           |
| 3     | 0     | 3     | 2     | 6   | 8   | -1.556363085668E+04           |
| 3     | 0     | 3     | -3    | 0   | 8   | -2.553018457467E+02           |
| 3     | 0     | 3     | 3     | 0   | 8   | 2.553018457467E+02            |
| 3     | 0     | 3     | -3    | 2   | 8   | 3.955119187331E+02            |
| 3     | 0     | 3     | 3     | 2   | 8   | -3.955119187331E+02           |
| 3     | 0     | 3     | -3    | 4   | 8   | 1.850638237603E+03            |
| 3     | 0     | 3     | 3     | 4   | 8   | -1.850638237603E+03           |
| 3     | 0     | 3     | -3    | 6   | 8   | 5.768609775739E+04            |
| 3     | 0     | 3     | 3     | 6   | 8   | -5.768609775739E+04           |
| 3     | -1    | 1     | 0     | 2   | 8   | -5.002766213434E+03           |
| 3     | 1     | 1     | 0     | 2   | 8   | 5.002766213434E+03            |
| 3     | -1    | 1     | 0     | 4   | 8   | 2.583417363946E+04            |
| 3     | 1     | 1     | 0     | 4   | 8   | -2.583417363946E+04           |
| 3     | -1    | 1     | -1    | 2   | 8   | 7.078539277236E+01            |
| 3     | -1    | 1     | 1     | 2   | 8   | -7.078539277236E+01           |
| 3     | 1     | 1     | -1    | 2   | 8   | -7.078539277236E+01           |
| 3     | 1     | 1     | 1     | 2   | 8   | 7.078539277236E+01            |
| 3     | -1    | 1     | -1    | 4   | 8   | -3.655341964828E+02           |
| 3     | -1    | 1     | 1     | 4   | 8   | 3.655341964828E+02            |
| 3     | 1     | 1     | -1    | 4   | 8   | 3.655341964828E+02            |
| 3     | 1     | 1     | 1     | 4   | 8   | -3.655341964828E+02           |
| 3     | -1    | 2     | 0     | 2   | 8   | 5.824342097567E+02            |
| 3     | 1     | 2     | 0     | 2   | 8   | 5.824342097567E+02            |
| 3     | -1    | 2     | 0     | 4   | 8   | 1.647372717256E+03            |
| 3     | 1     | 2     | 0     | 4   | 8   | 1.647372717256E+03            |
| 3     | -1    | 2     | 1     | 2   | 8   | 1.001155465402E+03            |
| 3     | 1     | 2     | -1    | 2   | 8   | -1.001155465402E+03           |
| 3     | -1    | 2     | -1    | 2   | 8   | 4.247909370244E+02            |
| 3     | 1     | 2     | 1     | 2   | 8   | -4.247909370244E+02           |
| 3     | -1    | 2     | -1    | 4   | 8   | 1.201490208626E+03            |
| 3     | 1     | 2     | 1     | 4   | 8   | -1.201490208626E+03           |
| 3     | -1    | 2     | 1     | 4   | 8   | 2.831695274430E+03            |
| 3     | 1     | 2     | -1    | 4   | 8   | -2.831695274430E+03           |
| 3     | -1    | 2     | 2     | 2   | 8   | 1.370843796236E+02            |
| 3     | 1     | 2     | -2    | 2   | 8   | 1.370843796236E+02            |
| 3     | -1    | 2     | -2    | 2   | 8   | -5.279466751232E+02           |
| 3     | 1     | 2     | 2     | 2   | 8   | -5.279466751232E+02           |
| 3     | -1    | 2     | -2    | 4   | 8   | -1.493258696338E+03           |
| 3     | 1     | 2     | 2     | 4   | 8   | -1.493258696338E+03           |
| 3     | -1    | 2     | 2     | 4   | 8   | 3.877331777065E+02            |
| 3     | 1     | 2     | -2    | 4   | 8   | 3.877331777065E+02            |
| 3     | -1    | 3     | 0     | 0   | 8   | -4.370476890079E+02           |
| 3     | 1     | 3     | 0     | 0   | 8   | 4.370476890079E+02            |
| 3     | -1    | 3     | 0     | 2   | 8   | 6.770713684104E+02            |
| 3     | 1     | 3     | 0     | 2   | 8   | -6.770713684104E+02           |
| 3     | -1    | 3     | 0     | 4   | 8   | 3.168081932853E+03            |
| 3     | 1     | 3     | 0     | 4   | 8   | -3.168081932853E+03           |
| 3     | -1    | 3     | 0     | 6   | 8   | 9.875203071492E+04            |
| 3     | 1     | 3     | 0     | 6   | 8   | -9.875203071492E+04           |
| 3     | -1    | 3     | -1    | 0   | 8   | 5.136720875624E+02            |
| 3     | -1    | 3     | 1     | 0   | 8   | -5.136720875624E+02           |
| 3     | 1     | 3     | -1    | 0   | 8   | -5.136720875624E+02           |
| 3     | 1     | 3     | 1     | 0   | 8   | 5.136720875624E+02            |

continued on next page

| $L_A$ | $K_A$ | $L_B$ | $K_B$ | $L$ | $N$ | $C_{L_A, K_A, L_B, K_B, L}^N$ |
|-------|-------|-------|-------|-----|-----|-------------------------------|
| 3     | -1    | 3     | -1    | 2   | 8   | -7.957773762163E+02           |
| 3     | -1    | 3     | 1     | 2   | 8   | 7.957773762163E+02            |
| 3     | 1     | 3     | -1    | 2   | 8   | 7.957773762163E+02            |
| 3     | 1     | 3     | 1     | 2   | 8   | -7.957773762163E+02           |
| 3     | -1    | 3     | -1    | 4   | 8   | -3.723518739366E+03           |
| 3     | -1    | 3     | 1     | 4   | 8   | 3.723518739366E+03            |
| 3     | 1     | 3     | -1    | 4   | 8   | 3.723518739366E+03            |
| 3     | 1     | 3     | 1     | 4   | 8   | -3.723518739366E+03           |
| 3     | -1    | 3     | -1    | 6   | 8   | -1.160655073672E+05           |
| 3     | -1    | 3     | 1     | 6   | 8   | 1.160655073672E+05            |
| 3     | 1     | 3     | -1    | 6   | 8   | 1.160655073672E+05            |
| 3     | 1     | 3     | 1     | 6   | 8   | -1.160655073672E+05           |
| 3     | -1    | 3     | -2    | 0   | 8   | -8.133209851138E+01           |
| 3     | -1    | 3     | 2     | 0   | 8   | -8.133209851138E+01           |
| 3     | 1     | 3     | -2    | 0   | 8   | 8.133209851138E+01            |
| 3     | 1     | 3     | 2     | 0   | 8   | 8.133209851138E+01            |
| 3     | -1    | 3     | -2    | 2   | 8   | 1.259991452187E+02            |
| 3     | -1    | 3     | 2     | 2   | 8   | 1.259991452187E+02            |
| 3     | 1     | 3     | -2    | 2   | 8   | -1.259991452187E+02           |
| 3     | 1     | 3     | 2     | 2   | 8   | -1.259991452187E+02           |
| 3     | -1    | 3     | -2    | 4   | 8   | 5.895620966212E+02            |
| 3     | -1    | 3     | 2     | 4   | 8   | 5.895620966212E+02            |
| 3     | 1     | 3     | -2    | 4   | 8   | -5.895620966212E+02           |
| 3     | 1     | 3     | 2     | 4   | 8   | -5.895620966212E+02           |
| 3     | -1    | 3     | -2    | 6   | 8   | 1.837719336427E+04            |
| 3     | -1    | 3     | 2     | 6   | 8   | 1.837719336427E+04            |
| 3     | 1     | 3     | -2    | 6   | 8   | -1.837719336427E+04           |
| 3     | 1     | 3     | 2     | 6   | 8   | -1.837719336427E+04           |
| 3     | -1    | 3     | -3    | 0   | 8   | 2.989446049545E+02            |
| 3     | -1    | 3     | 3     | 0   | 8   | -2.989446049545E+02           |
| 3     | 1     | 3     | -3    | 0   | 8   | -2.989446049545E+02           |
| 3     | 1     | 3     | 3     | 0   | 8   | 2.989446049545E+02            |
| 3     | -1    | 3     | -3    | 2   | 8   | -4.631229905710E+02           |
| 3     | -1    | 3     | 3     | 2   | 8   | 4.631229905710E+02            |
| 3     | 1     | 3     | -3    | 2   | 8   | 4.631229905710E+02            |
| 3     | 1     | 3     | 3     | 2   | 8   | -4.631229905710E+02           |
| 3     | -1    | 3     | -3    | 4   | 8   | -2.166996933516E+03           |
| 3     | -1    | 3     | 3     | 4   | 8   | 2.166996933516E+03            |
| 3     | 1     | 3     | -3    | 4   | 8   | 2.166996933516E+03            |
| 3     | 1     | 3     | 3     | 4   | 8   | -2.166996933516E+03           |
| 3     | -1    | 3     | -3    | 6   | 8   | -6.754728958194E+04           |
| 3     | -1    | 3     | 3     | 6   | 8   | 6.754728958194E+04            |
| 3     | 1     | 3     | -3    | 6   | 8   | 6.754728958194E+04            |
| 3     | 1     | 3     | 3     | 6   | 8   | -6.754728958194E+04           |
| 3     | -2    | 1     | 0     | 2   | 8   | 7.203835198878E+02            |
| 3     | 2     | 1     | 0     | 2   | 8   | 7.203835198878E+02            |
| 3     | -2    | 1     | 0     | 4   | 8   | -3.720044500544E+03           |
| 3     | 2     | 1     | 0     | 4   | 8   | -3.720044500544E+03           |
| 3     | -2    | 1     | -1    | 2   | 8   | 1.247234627981E+01            |
| 3     | -2    | 1     | 1     | 2   | 8   | -1.247234627981E+01           |
| 3     | 2     | 1     | -1    | 2   | 8   | 1.247234627981E+01            |
| 3     | 2     | 1     | 1     | 2   | 8   | -1.247234627981E+01           |
| 3     | -2    | 1     | -1    | 4   | 8   | -6.440691923979E+01           |
| 3     | -2    | 1     | 1     | 4   | 8   | 6.440691923979E+01            |
| 3     | 2     | 1     | -1    | 4   | 8   | -6.440691923979E+01           |
| 3     | 2     | 1     | 1     | 4   | 8   | 6.440691923979E+01            |
| 3     | -2    | 2     | 0     | 2   | 8   | 6.661160256705E+02            |
| 3     | 2     | 2     | 0     | 2   | 8   | -6.661160256705E+02           |
| 3     | -2    | 2     | 0     | 4   | 8   | 1.884060635235E+03            |
| 3     | 2     | 2     | 0     | 4   | 8   | -1.884060635235E+03           |
| 3     | -2    | 2     | 1     | 2   | 8   | 2.171932266245E+02            |
| 3     | 2     | 2     | -1    | 2   | 8   | 2.171932266245E+02            |
| 3     | -2    | 2     | -1    | 2   | 8   | -4.422443253823E+02           |
| 3     | 2     | 2     | 1     | 2   | 8   | -4.422443253823E+02           |
| 3     | -2    | 2     | -1    | 4   | 8   | -1.250855845676E+03           |
| 3     | 2     | 2     | 1     | 4   | 8   | -1.250855845676E+03           |

continued on next page

| $L_A$ | $K_A$ | $L_B$ | $K_B$ | $L$ | $N$ | $C_{L_A, K_A, L_B, K_B, L}^N$ |
|-------|-------|-------|-------|-----|-----|-------------------------------|
| 3     | -2    | 2     | 1     | 4   | 8   | 6.143152134959E+02            |
| 3     | 2     | 2     | -1    | 4   | 8   | 6.143152134959E+02            |
| 3     | -2    | 2     | -2    | 2   | 8   | -1.719889038313E+02           |
| 3     | 2     | 2     | 2     | 2   | 8   | 1.719889038313E+02            |
| 3     | -2    | 2     | 2     | 2   | 8   | -2.756592906077E+02           |
| 3     | 2     | 2     | -2    | 2   | 8   | 2.756592906077E+02            |
| 3     | -2    | 2     | -2    | 4   | 8   | -4.864580807517E+02           |
| 3     | 2     | 2     | 2     | 4   | 8   | 4.864580807517E+02            |
| 3     | -2    | 2     | 2     | 4   | 8   | -7.796822147430E+02           |
| 3     | 2     | 2     | -2    | 4   | 8   | 7.796822147430E+02            |
| 3     | -2    | 3     | 0     | 0   | 8   | 6.888009136864E+01            |
| 3     | 2     | 3     | 0     | 0   | 8   | 6.888009136864E+01            |
| 3     | -2    | 3     | 0     | 2   | 8   | -1.067085787024E+02           |
| 3     | 2     | 3     | 0     | 2   | 8   | -1.067085787024E+02           |
| 3     | -2    | 3     | 0     | 4   | 8   | -4.992996839628E+02           |
| 3     | 2     | 3     | 0     | 4   | 8   | -4.992996839628E+02           |
| 3     | -2    | 3     | 0     | 6   | 8   | -1.556363085668E+04           |
| 3     | 2     | 3     | 0     | 6   | 8   | -1.556363085668E+04           |
| 3     | -2    | 3     | -1    | 0   | 8   | -8.133209851138E+01           |
| 3     | -2    | 3     | 1     | 0   | 8   | 8.133209851138E+01            |
| 3     | 2     | 3     | -1    | 0   | 8   | -8.133209851138E+01           |
| 3     | 2     | 3     | 1     | 0   | 8   | 8.133209851138E+01            |
| 3     | -2    | 3     | -1    | 2   | 8   | 1.259991452187E+02            |
| 3     | -2    | 3     | 1     | 2   | 8   | -1.259991452187E+02           |
| 3     | 2     | 3     | -1    | 2   | 8   | 1.259991452187E+02            |
| 3     | 2     | 3     | 1     | 2   | 8   | -1.259991452187E+02           |
| 3     | -2    | 3     | -1    | 4   | 8   | 5.895620966212E+02            |
| 3     | -2    | 3     | 1     | 4   | 8   | -5.895620966212E+02           |
| 3     | 2     | 3     | -1    | 4   | 8   | 5.895620966212E+02            |
| 3     | 2     | 3     | 1     | 4   | 8   | -5.895620966212E+02           |
| 3     | -2    | 3     | -1    | 6   | 8   | 1.837719336427E+04            |
| 3     | -2    | 3     | 1     | 6   | 8   | -1.837719336427E+04           |
| 3     | 2     | 3     | -1    | 6   | 8   | 1.837719336427E+04            |
| 3     | 2     | 3     | 1     | 6   | 8   | -1.837719336427E+04           |
| 3     | -2    | 3     | -2    | 0   | 8   | 1.379702352599E+01            |
| 3     | -2    | 3     | 2     | 0   | 8   | 1.379702352599E+01            |
| 3     | 2     | 3     | -2    | 0   | 8   | 1.379702352599E+01            |
| 3     | 2     | 3     | 2     | 0   | 8   | 1.379702352599E+01            |
| 3     | -2    | 3     | -2    | 2   | 8   | -2.137425693736E+01           |
| 3     | -2    | 3     | 2     | 2   | 8   | -2.137425693736E+01           |
| 3     | 2     | 3     | -2    | 2   | 8   | -2.137425693736E+01           |
| 3     | 2     | 3     | 2     | 2   | 8   | -2.137425693736E+01           |
| 3     | -2    | 3     | -2    | 4   | 8   | -1.000122001768E+02           |
| 3     | -2    | 3     | 2     | 4   | 8   | -1.000122001768E+02           |
| 3     | 2     | 3     | -2    | 4   | 8   | -1.000122001768E+02           |
| 3     | 2     | 3     | 2     | 4   | 8   | -1.000122001768E+02           |
| 3     | -2    | 3     | -2    | 6   | 8   | -3.117472361211E+03           |
| 3     | -2    | 3     | 2     | 6   | 8   | -3.117472361211E+03           |
| 3     | 2     | 3     | -2    | 6   | 8   | -3.117472361211E+03           |
| 3     | 2     | 3     | 2     | 6   | 8   | -3.117472361211E+03           |
| 3     | -2    | 3     | -3    | 0   | 8   | -4.463583338244E+01           |
| 3     | -2    | 3     | 3     | 0   | 8   | 4.463583338244E+01            |
| 3     | 2     | 3     | -3    | 0   | 8   | -4.463583338244E+01           |
| 3     | 2     | 3     | 3     | 0   | 8   | 4.463583338244E+01            |
| 3     | -2    | 3     | -3    | 2   | 8   | 6.914953573371E+01            |
| 3     | -2    | 3     | 3     | 2   | 8   | -6.914953573371E+01           |
| 3     | 2     | 3     | -3    | 2   | 8   | 6.914953573371E+01            |
| 3     | 2     | 3     | 3     | 2   | 8   | -6.914953573371E+01           |
| 3     | -2    | 3     | -3    | 4   | 8   | 3.235573161770E+02            |
| 3     | -2    | 3     | 3     | 4   | 8   | -3.235573161770E+02           |
| 3     | 2     | 3     | -3    | 4   | 8   | 3.235573161770E+02            |
| 3     | 2     | 3     | 3     | 4   | 8   | -3.235573161770E+02           |
| 3     | -2    | 3     | -3    | 6   | 8   | 1.008557944598E+04            |
| 3     | -2    | 3     | 3     | 6   | 8   | -1.008557944598E+04           |
| 3     | 2     | 3     | -3    | 6   | 8   | 1.008557944598E+04            |
| 3     | 2     | 3     | 3     | 6   | 8   | -1.008557944598E+04           |

continued on next page

| $L_A$ | $K_A$ | $L_B$ | $K_B$ | $L$ | $N$ | $C_{L_A, K_A, L_B, K_B, L}^N$ |
|-------|-------|-------|-------|-----|-----|-------------------------------|
| 3     | -3    | 1     | 0     | 2   | 8   | -3.123517342995E+03           |
| 3     | 3     | 1     | 0     | 2   | 8   | 3.123517342995E+03            |
| 3     | -3    | 1     | 0     | 4   | 8   | 1.612977420135E+04            |
| 3     | 3     | 1     | 0     | 4   | 8   | -1.612977420135E+04           |
| 3     | -3    | 1     | -1    | 2   | 8   | 1.118586811746E+02            |
| 3     | -3    | 1     | 1     | 2   | 8   | -1.118586811746E+02           |
| 3     | 3     | 1     | -1    | 2   | 8   | -1.118586811746E+02           |
| 3     | 3     | 1     | 1     | 2   | 8   | 1.118586811746E+02            |
| 3     | -3    | 1     | -1    | 4   | 8   | -5.776357457574E+02           |
| 3     | -3    | 1     | 1     | 4   | 8   | 5.776357457574E+02            |
| 3     | 3     | 1     | -1    | 4   | 8   | 5.776357457574E+02            |
| 3     | 3     | 1     | 1     | 4   | 8   | -5.776357457574E+02           |
| 3     | -3    | 2     | 0     | 2   | 8   | 9.090145002383E+02            |
| 3     | 3     | 2     | 0     | 2   | 8   | 9.090145002383E+02            |
| 3     | -3    | 2     | 0     | 4   | 8   | 2.571081269262E+03            |
| 3     | 3     | 2     | 0     | 4   | 8   | 2.571081269262E+03            |
| 3     | -3    | 2     | -1    | 2   | 8   | -3.463507298357E+01           |
| 3     | 3     | 2     | 1     | 2   | 8   | 3.463507298357E+01            |
| 3     | -3    | 2     | 1     | 2   | 8   | 8.667006106875E+02            |
| 3     | 3     | 2     | -1    | 2   | 8   | -8.667006106875E+02           |
| 3     | -3    | 2     | 1     | 4   | 8   | 2.451399516303E+03            |
| 3     | 3     | 2     | -1    | 4   | 8   | -2.451399516303E+03           |
| 3     | -3    | 2     | -1    | 4   | 8   | -9.796277989429E+01           |
| 3     | 3     | 2     | 1     | 4   | 8   | 9.796277989429E+01            |
| 3     | -3    | 2     | 2     | 2   | 8   | -1.110125684866E+02           |
| 3     | 3     | 2     | -2    | 2   | 8   | -1.110125684866E+02           |
| 3     | -3    | 2     | -2    | 2   | 8   | -5.029561585337E+02           |
| 3     | 3     | 2     | 2     | 2   | 8   | -5.029561585337E+02           |
| 3     | -3    | 2     | -2    | 4   | 8   | -1.422574841355E+03           |
| 3     | 3     | 2     | 2     | 4   | 8   | -1.422574841355E+03           |
| 3     | -3    | 2     | 2     | 4   | 8   | -3.139909598951E+02           |
| 3     | 3     | 2     | -2    | 4   | 8   | -3.139909598951E+02           |
| 3     | -3    | 3     | 0     | 0   | 8   | -2.553018457467E+02           |
| 3     | 3     | 3     | 0     | 0   | 8   | 2.553018457467E+02            |
| 3     | -3    | 3     | 0     | 2   | 8   | 3.955119187331E+02            |
| 3     | 3     | 3     | 0     | 2   | 8   | -3.955119187331E+02           |
| 3     | -3    | 3     | 0     | 4   | 8   | 1.850638237603E+03            |
| 3     | 3     | 3     | 0     | 4   | 8   | -1.850638237603E+03           |
| 3     | -3    | 3     | 0     | 6   | 8   | 5.768609775739E+04            |
| 3     | 3     | 3     | 0     | 6   | 8   | -5.768609775739E+04           |
| 3     | -3    | 3     | -1    | 0   | 8   | 2.989446049545E+02            |
| 3     | -3    | 3     | 1     | 0   | 8   | -2.989446049545E+02           |
| 3     | 3     | 3     | -1    | 0   | 8   | -2.989446049545E+02           |
| 3     | 3     | 3     | 1     | 0   | 8   | 2.989446049545E+02            |
| 3     | -3    | 3     | -1    | 2   | 8   | -4.631229905710E+02           |
| 3     | -3    | 3     | 1     | 2   | 8   | 4.631229905710E+02            |
| 3     | 3     | 3     | -1    | 2   | 8   | 4.631229905710E+02            |
| 3     | 3     | 3     | 1     | 2   | 8   | -4.631229905710E+02           |
| 3     | -3    | 3     | -1    | 4   | 8   | -2.166996933516E+03           |
| 3     | -3    | 3     | 1     | 4   | 8   | 2.166996933516E+03            |
| 3     | 3     | 3     | -1    | 4   | 8   | 2.166996933516E+03            |
| 3     | 3     | 3     | 1     | 4   | 8   | -2.166996933516E+03           |
| 3     | -3    | 3     | -1    | 6   | 8   | -6.754728958194E+04           |
| 3     | -3    | 3     | 1     | 6   | 8   | 6.754728958194E+04            |
| 3     | 3     | 3     | -1    | 6   | 8   | 6.754728958194E+04            |
| 3     | 3     | 3     | 1     | 6   | 8   | -6.754728958194E+04           |
| 3     | -3    | 3     | -2    | 0   | 8   | -4.463583338244E+01           |
| 3     | -3    | 3     | 2     | 0   | 8   | -4.463583338244E+01           |
| 3     | 3     | 3     | -2    | 0   | 8   | 4.463583338244E+01            |
| 3     | 3     | 3     | 2     | 0   | 8   | 4.463583338244E+01            |
| 3     | -3    | 3     | -2    | 2   | 8   | 6.914953573371E+01            |
| 3     | -3    | 3     | 2     | 2   | 8   | 6.914953573371E+01            |
| 3     | 3     | 3     | -2    | 2   | 8   | -6.914953573371E+01           |
| 3     | 3     | 3     | 2     | 2   | 8   | -6.914953573371E+01           |
| 3     | -3    | 3     | -2    | 4   | 8   | 3.235573161770E+02            |
| 3     | -3    | 3     | 2     | 4   | 8   | 3.235573161770E+02            |

continued on next page

| $L_A$ | $K_A$ | $L_B$ | $K_B$ | $L$ | $N$ | $C_{L_A, K_A, L_B, K_B, L}^N$ |
|-------|-------|-------|-------|-----|-----|-------------------------------|
| 3     | 3     | 3     | -2    | 4   | 8   | -3.235573161770E+02           |
| 3     | 3     | 3     | 2     | 4   | 8   | -3.235573161770E+02           |
| 3     | -3    | 3     | -2    | 6   | 8   | 1.008557944598E+04            |
| 3     | -3    | 3     | 2     | 6   | 8   | 1.008557944598E+04            |
| 3     | 3     | 3     | -2    | 6   | 8   | -1.008557944598E+04           |
| 3     | 3     | 3     | 2     | 6   | 8   | -1.008557944598E+04           |
| 3     | -3    | 3     | -3    | 0   | 8   | 1.819711528553E+02            |
| 3     | -3    | 3     | 3     | 0   | 8   | -1.819711528553E+02           |
| 3     | 3     | 3     | -3    | 0   | 8   | -1.819711528553E+02           |
| 3     | 3     | 3     | 3     | 0   | 8   | 1.819711528553E+02            |
| 3     | -3    | 3     | -3    | 2   | 8   | -2.819084977996E+02           |
| 3     | -3    | 3     | 3     | 2   | 8   | 2.819084977996E+02            |
| 3     | 3     | 3     | -3    | 2   | 8   | 2.819084977996E+02            |
| 3     | 3     | 3     | 3     | 2   | 8   | -2.819084977996E+02           |
| 3     | -3    | 3     | -3    | 4   | 8   | -1.319076924924E+03           |
| 3     | -3    | 3     | 3     | 4   | 8   | 1.319076924924E+03            |
| 3     | 3     | 3     | -3    | 4   | 8   | 1.319076924924E+03            |
| 3     | 3     | 3     | 3     | 4   | 8   | -1.319076924924E+03           |
| 3     | -3    | 3     | -3    | 6   | 8   | -4.111684223018E+04           |
| 3     | -3    | 3     | 3     | 6   | 8   | 4.111684223018E+04            |
| 3     | 3     | 3     | -3    | 6   | 8   | 4.111684223018E+04            |
| 3     | 3     | 3     | 3     | 6   | 8   | -4.111684223018E+04           |
| 4     | 0     | 0     | 0     | 4   | 8   | -5.368927075565E+02           |
| 4     | 0     | 2     | 0     | 2   | 8   | 1.455572676892E+01            |
| 4     | 0     | 2     | 0     | 4   | 8   | 7.276694425542E+01            |
| 4     | 0     | 2     | 0     | 6   | 8   | 6.329022326908E+02            |
| 4     | 0     | 2     | -1    | 2   | 8   | -7.541254489782E+00           |
| 4     | 0     | 2     | 1     | 2   | 8   | 7.541254489782E+00            |
| 4     | 0     | 2     | -1    | 4   | 8   | -3.679074684477E+01           |
| 4     | 0     | 2     | 1     | 4   | 8   | 3.679074684477E+01            |
| 4     | 0     | 2     | -1    | 6   | 8   | -3.316219027751E+02           |
| 4     | 0     | 2     | 1     | 6   | 8   | 3.316219027751E+02            |
| 4     | 0     | 2     | -2    | 2   | 8   | -5.669687411849E+00           |
| 4     | 0     | 2     | 2     | 2   | 8   | -5.669687411849E+00           |
| 4     | 0     | 2     | -2    | 4   | 8   | -2.620057570371E+01           |
| 4     | 0     | 2     | 2     | 4   | 8   | -2.620057570371E+01           |
| 4     | 0     | 2     | -2    | 6   | 8   | -2.552880098242E+02           |
| 4     | 0     | 2     | 2     | 6   | 8   | -2.552880098242E+02           |
| 4     | -1    | 0     | 0     | 4   | 8   | -9.451931859295E+04           |
| 4     | 1     | 0     | 0     | 4   | 8   | 9.451931859295E+04            |
| 4     | -1    | 2     | 0     | 2   | 8   | 6.766202508728E+02            |
| 4     | 1     | 2     | 0     | 2   | 8   | -6.766202508728E+02           |
| 4     | -1    | 2     | 0     | 4   | 8   | 1.565678419174E+03            |
| 4     | 1     | 2     | 0     | 4   | 8   | -1.565678419174E+03           |
| 4     | -1    | 2     | 0     | 6   | 8   | 3.684831051961E+04            |
| 4     | 1     | 2     | 0     | 6   | 8   | -3.684831051961E+04           |
| 4     | -1    | 2     | -1    | 2   | 8   | -3.357842119518E+02           |
| 4     | -1    | 2     | 1     | 2   | 8   | 3.357842119518E+02            |
| 4     | 1     | 2     | -1    | 2   | 8   | 3.357842119518E+02            |
| 4     | 1     | 2     | 1     | 2   | 8   | -3.357842119518E+02           |
| 4     | -1    | 2     | -1    | 4   | 8   | -7.768923746327E+02           |
| 4     | -1    | 2     | 1     | 4   | 8   | 7.768923746327E+02            |
| 4     | 1     | 2     | -1    | 4   | 8   | 7.768923746327E+02            |
| 4     | 1     | 2     | 1     | 4   | 8   | -7.768923746327E+02           |
| 4     | -1    | 2     | -1    | 6   | 8   | -1.828701240951E+04           |
| 4     | -1    | 2     | 1     | 6   | 8   | 1.828701240951E+04            |
| 4     | 1     | 2     | -1    | 6   | 8   | 1.828701240951E+04            |
| 4     | 1     | 2     | 1     | 6   | 8   | -1.828701240951E+04           |
| 4     | -1    | 2     | -2    | 2   | 8   | -2.292573751343E+02           |
| 4     | -1    | 2     | 2     | 2   | 8   | -2.292573751343E+02           |
| 4     | 1     | 2     | -2    | 2   | 8   | 2.292573751343E+02            |
| 4     | 1     | 2     | 2     | 2   | 8   | 2.292573751343E+02            |
| 4     | -1    | 2     | -2    | 4   | 8   | -5.302225831556E+02           |
| 4     | -1    | 2     | 2     | 4   | 8   | -5.302225831556E+02           |
| 4     | 1     | 2     | -2    | 4   | 8   | 5.302225831556E+02            |
| 4     | 1     | 2     | 2     | 4   | 8   | 5.302225831556E+02            |

continued on next page

| $L_A$ | $K_A$ | $L_B$ | $K_B$ | $L$ | $N$ | $C_{L_A, K_A, L_B, K_B, L}^N$ |
|-------|-------|-------|-------|-----|-----|-------------------------------|
| 4     | -1    | 2     | -2    | 6   | 8   | -1.248632321432E+04           |
| 4     | -1    | 2     | 2     | 6   | 8   | -1.248632321432E+04           |
| 4     | 1     | 2     | -2    | 6   | 8   | 1.248632321432E+04            |
| 4     | 1     | 2     | 2     | 6   | 8   | 1.248632321432E+04            |
| 4     | -2    | 0     | 0     | 4   | 8   | -7.170625009708E+04           |
| 4     | 2     | 0     | 0     | 4   | 8   | -7.170625009708E+04           |
| 4     | -2    | 2     | 0     | 2   | 8   | 5.183809568636E+02            |
| 4     | 2     | 2     | 0     | 2   | 8   | 5.183809568636E+02            |
| 4     | -2    | 2     | 0     | 4   | 8   | 1.202300768749E+03            |
| 4     | 2     | 2     | 0     | 4   | 8   | 1.202300768749E+03            |
| 4     | -2    | 2     | 0     | 6   | 8   | 2.821932014907E+04            |
| 4     | 2     | 2     | 0     | 6   | 8   | 2.821932014907E+04            |
| 4     | -2    | 2     | -1    | 2   | 8   | -2.577006219697E+02           |
| 4     | -2    | 2     | 1     | 2   | 8   | 2.577006219697E+02            |
| 4     | 2     | 2     | -1    | 2   | 8   | -2.577006219697E+02           |
| 4     | 2     | 2     | 1     | 2   | 8   | 2.577006219697E+02            |
| 4     | -2    | 2     | -1    | 4   | 8   | -5.978551703745E+02           |
| 4     | -2    | 2     | 1     | 4   | 8   | 5.978551703745E+02            |
| 4     | 2     | 2     | -1    | 4   | 8   | -5.978551703745E+02           |
| 4     | 2     | 2     | 1     | 4   | 8   | 5.978551703745E+02            |
| 4     | -2    | 2     | -1    | 6   | 8   | -1.402790091601E+04           |
| 4     | -2    | 2     | 1     | 6   | 8   | 1.402790091601E+04            |
| 4     | 2     | 2     | -1    | 6   | 8   | -1.402790091601E+04           |
| 4     | 2     | 2     | 1     | 6   | 8   | 1.402790091601E+04            |
| 4     | -2    | 2     | -2    | 2   | 8   | -1.765825633296E+02           |
| 4     | -2    | 2     | 2     | 2   | 8   | -1.765825633296E+02           |
| 4     | 2     | 2     | -2    | 2   | 8   | -1.765825633296E+02           |
| 4     | 2     | 2     | 2     | 2   | 8   | -1.765825633296E+02           |
| 4     | -2    | 2     | -2    | 4   | 8   | -4.099919541302E+02           |
| 4     | -2    | 2     | 2     | 4   | 8   | -4.099919541302E+02           |
| 4     | 2     | 2     | -2    | 4   | 8   | -4.099919541302E+02           |
| 4     | 2     | 2     | 2     | 4   | 8   | -4.099919541302E+02           |
| 4     | -2    | 2     | -2    | 6   | 8   | -9.610910903587E+03           |
| 4     | -2    | 2     | 2     | 6   | 8   | -9.610910903587E+03           |
| 4     | 2     | 2     | -2    | 6   | 8   | -9.610910903587E+03           |
| 4     | 2     | 2     | 2     | 6   | 8   | -9.610910903587E+03           |
| 4     | -3    | 0     | 0     | 4   | 8   | -1.066961967907E+04           |
| 4     | 3     | 0     | 0     | 4   | 8   | 1.066961967907E+04            |
| 4     | -3    | 2     | 0     | 2   | 8   | 9.021570409352E+01            |
| 4     | 3     | 2     | 0     | 2   | 8   | -9.021570409352E+01           |
| 4     | -3    | 2     | 0     | 4   | 8   | 2.566553453484E+02            |
| 4     | 3     | 2     | 0     | 4   | 8   | -2.566553453484E+02           |
| 4     | -3    | 2     | 0     | 6   | 8   | 4.717264192400E+03            |
| 4     | 3     | 2     | 0     | 6   | 8   | -4.717264192400E+03           |
| 4     | -3    | 2     | -1    | 2   | 8   | -4.512381375247E+01           |
| 4     | -3    | 2     | 1     | 2   | 8   | 4.512381375247E+01            |
| 4     | 3     | 2     | -1    | 2   | 8   | 4.512381375247E+01            |
| 4     | 3     | 2     | 1     | 2   | 8   | -4.512381375247E+01           |
| 4     | -3    | 2     | -1    | 4   | 8   | -1.282293905106E+02           |
| 4     | -3    | 2     | 1     | 4   | 8   | 1.282293905106E+02            |
| 4     | 3     | 2     | -1    | 4   | 8   | 1.282293905106E+02            |
| 4     | 3     | 2     | 1     | 4   | 8   | -1.282293905106E+02           |
| 4     | -3    | 2     | -1    | 6   | 8   | -2.360054169959E+03           |
| 4     | -3    | 2     | 1     | 6   | 8   | 2.360054169959E+03            |
| 4     | 3     | 2     | -1    | 6   | 8   | 2.360054169959E+03            |
| 4     | 3     | 2     | 1     | 6   | 8   | -2.360054169959E+03           |
| 4     | -3    | 2     | -2    | 2   | 8   | -3.113639837238E+01           |
| 4     | -3    | 2     | 2     | 2   | 8   | -3.113639837238E+01           |
| 4     | 3     | 2     | -2    | 2   | 8   | 3.113639837238E+01            |
| 4     | 3     | 2     | 2     | 2   | 8   | 3.113639837238E+01            |
| 4     | -3    | 2     | -2    | 4   | 8   | -8.832498744783E+01           |
| 4     | -3    | 2     | 2     | 4   | 8   | -8.832498744783E+01           |
| 4     | 3     | 2     | -2    | 4   | 8   | 8.832498744783E+01            |
| 4     | 3     | 2     | 2     | 4   | 8   | 8.832498744783E+01            |
| 4     | -3    | 2     | -2    | 6   | 8   | -1.629125885418E+03           |
| 4     | -3    | 2     | 2     | 6   | 8   | -1.629125885418E+03           |

continued on next page

Dispersion coefficients continued from previous page

| $L_A$ | $K_A$ | $L_B$ | $K_B$ | $L$ | $N$ | $C_{L_A, K_A, L_B, K_B, L}^N$ |
|-------|-------|-------|-------|-----|-----|-------------------------------|
| 4     | 3     | 2     | -2    | 6   | 8   | 1.629125885418E+03            |
| 4     | 3     | 2     | 2     | 6   | 8   | 1.629125885418E+03            |
| 4     | -4    | 0     | 0     | 4   | 8   | 1.225067405972E+04            |
| 4     | 4     | 0     | 0     | 4   | 8   | 1.225067405972E+04            |
| 4     | -4    | 2     | 0     | 2   | 8   | -9.237746429058E+01           |
| 4     | 4     | 2     | 0     | 2   | 8   | -9.237746429058E+01           |
| 4     | -4    | 2     | 0     | 4   | 8   | -2.084957872098E+02           |
| 4     | 4     | 2     | 0     | 4   | 8   | -2.084957872098E+02           |
| 4     | -4    | 2     | 0     | 6   | 8   | -5.052334267652E+03           |
| 4     | 4     | 2     | 0     | 6   | 8   | -5.052334267652E+03           |
| 4     | -4    | 2     | -1    | 2   | 8   | 4.634952399582E+01            |
| 4     | -4    | 2     | 1     | 2   | 8   | -4.634952399582E+01           |
| 4     | 4     | 2     | -1    | 2   | 8   | 4.634952399582E+01            |
| 4     | 4     | 2     | 1     | 2   | 8   | -4.634952399582E+01           |
| 4     | -4    | 2     | -1    | 4   | 8   | 1.047038098325E+02            |
| 4     | -4    | 2     | 1     | 4   | 8   | -1.047038098325E+02           |
| 4     | 4     | 2     | -1    | 4   | 8   | 1.047038098325E+02            |
| 4     | 4     | 2     | 1     | 4   | 8   | -1.047038098325E+02           |
| 4     | -4    | 2     | -1    | 6   | 8   | 2.534580956098E+03            |
| 4     | -4    | 2     | 1     | 6   | 8   | -2.534580956098E+03           |
| 4     | 4     | 2     | -1    | 6   | 8   | 2.534580956098E+03            |
| 4     | 4     | 2     | 1     | 6   | 8   | -2.534580956098E+03           |
| 4     | -4    | 2     | -2    | 2   | 8   | 3.236854280613E+01            |
| 4     | -4    | 2     | 2     | 2   | 8   | 3.236854280613E+01            |
| 4     | 4     | 2     | -2    | 2   | 8   | 3.236854280613E+01            |
| 4     | 4     | 2     | 2     | 2   | 8   | 3.236854280613E+01            |
| 4     | -4    | 2     | -2    | 4   | 8   | 7.327228046783E+01            |
| 4     | -4    | 2     | 2     | 4   | 8   | 7.327228046783E+01            |
| 4     | 4     | 2     | -2    | 4   | 8   | 7.327228046783E+01            |
| 4     | 4     | 2     | 2     | 4   | 8   | 7.327228046783E+01            |
| 4     | -4    | 2     | -2    | 6   | 8   | 1.769424200802E+03            |
| 4     | -4    | 2     | 2     | 6   | 8   | 1.769424200802E+03            |
| 4     | 4     | 2     | -2    | 6   | 8   | 1.769424200802E+03            |
| 4     | 4     | 2     | 2     | 6   | 8   | 1.769424200802E+03            |

- 
- [1] A. J. Stone, *The Theory of Intermolecular Forces* (Clarendon Press, Oxford, 1996).
  - [2] M. Grüning, O. V. Gritsenko, S. J. A. van Gisbergen, and E. J. Baerends, J. Chem. Phys. **114**, 652 (2001).
  - [3] P. E. S. Wormer and H. Hettema, *POLCOR package*, *University of Nijmegen* (1992).
  - [4] A. van der Avoird, P. E. S. Wormer, F. Mulder, and R. M. Berns, Top. Curr. Chem. **93**, 1 (1980).
